# Supplementary material
Source: PubMed Central journal article supplement (PMC5071162)
Supplement: NIHMS821233-supplement-Supporting_information.pdf [file NIHMS821233-supplement-Supporting_information.pdf]

**Effect of Substitution on the Aniline Moiety of the GPR88 Agonist 2-PCCA: Synthesis, Structure-Activity Relationships and Molecular Modeling Studies**

*Chunyang Jin,\* Ann M. Decker, Danni L. Harris, and Bruce E. Blough*

Center for Drug Discovery, Research Triangle Institute, Research Triangle Park, North Carolina 27709

**Supporting Information**

- I. HPLC results of **4a–g** and **5a–aa**.
- II. QSAR models A and B description (Table 1).
- III. ANOVA evaluations testing the relative statistical merit of model B relative to model A and model C relative to model B (Table 2).
- IV. Sequence alignment of GPR88 with selected GPCR templates (Figure 1).
- V. Sequence alignment of GPR88 with  $\beta$ 1-adrenergic receptor template (Figure 2).
- VI. PDB coordinates for GPR88 homology model.

**Method Notes**

XTerra MS C-18, 5um, 3.9 mm x 150 mm Compound 4a  
20-70% Acetonitrile with 0.1 % TFA - Water with 0.1% TFA, 1 mL/min

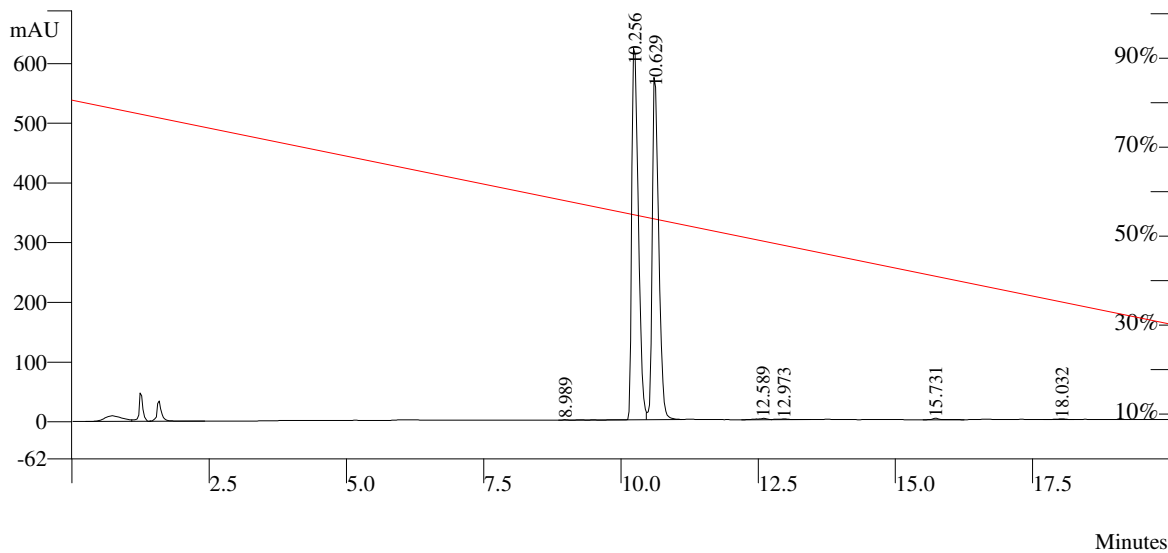

| Peak No | Result (%)     | Ret Time (min) | Rel Ret Time | Sep. Code | Width 1/2 (sec) | Peak Area (counts) | Peak Height (counts) |
|---------|----------------|----------------|--------------|-----------|-----------------|--------------------|----------------------|
| 1       | 0.0466         | 8.989          | 0.00         | BP        | 6.1             | 23830              | 3971                 |
| 2       | 51.8148        | 10.256         | 0.00         | PV        | 8.0             | 26508896           | 3134198              |
| 3       | 47.2975        | 10.629         | 0.00         | VB        | 7.8             | 24197796           | 2851500              |
| 4       | 0.2964         | 12.589         | 0.00         | BV        | 8.6             | 151648             | 12521                |
| 5       | 0.2007         | 12.973         | 0.00         | VB        | 0.0             | 102700             | 6918                 |
| 6       | 0.2108         | 15.731         | 0.00         | BB        | 6.9             | 107861             | 13082                |
| 7       | 0.1331         | 18.032         | 0.00         | BB        | 7.7             | 68110              | 6821                 |
|         | <b>99.9999</b> |                |              |           |                 | <b>51160840</b>    | <b>6029011</b>       |

**Method Notes**

XTerra MS C-18, 5um, 3.9x150 mm column Compound **4b**  
30-50% Acetonitrile with 0.1% TFA- Water with 0.1% TFA, 1 mL/min

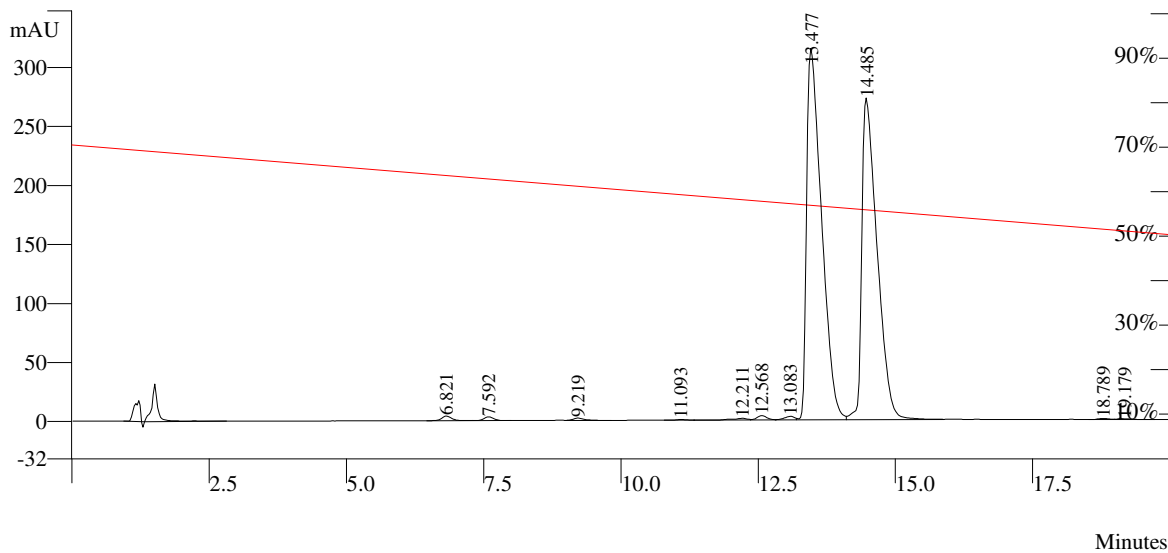

| Peak No | Result (%)     | Ret Time (min) | Rel Ret Time | Sep. Code | Width 1/2 (sec) | Peak Area (counts) | Peak Height (counts) |
|---------|----------------|----------------|--------------|-----------|-----------------|--------------------|----------------------|
| 1       | 0.4344         | 6.821          | 0.00         | BV        | 11.5            | 255640             | 19976                |
| 2       | 0.3346         | 7.592          | 0.00         | VB        | 11.5            | 196876             | 16131                |
| 3       | 0.2195         | 9.219          | 0.00         | BB        | 11.0            | 129179             | 10180                |
| 4       | 0.0683         | 11.093         | 0.00         | BV        | 11.4            | 40205              | 3478                 |
| 5       | 0.2437         | 12.211         | 0.00         | VV        | 33.6            | 143402             | 7394                 |
| 6       | 0.4014         | 12.568         | 0.00         | VV        | 12.0            | 236193             | 18886                |
| 7       | 0.3323         | 13.083         | 0.00         | VV        | 15.4            | 195557             | 15346                |
| 8       | 51.7365        | 13.477         | 0.00         | VV        | 17.9            | 30443684           | 1613560              |
| 9       | 46.0244        | 14.485         | 0.00         | VB        | 17.9            | 27082486           | 1396922              |
| 10      | 0.1102         | 18.789         | 0.00         | BV        | 13.8            | 64856              | 4550                 |
| 11      | 0.0946         | 19.179         | 0.00         | VB        | 15.0            | 55685              | 3275                 |
|         | <b>99.9999</b> |                |              |           |                 | <b>58843764</b>    | <b>3109698</b>       |

**Method Notes**

XTerra MS C-18, 5um, 3.9 mm x 150 mm Compound **4c**  
20-70% Acetonitrile with 0.1 % TFA - Water with 0.1% TFA, 1 mL/min

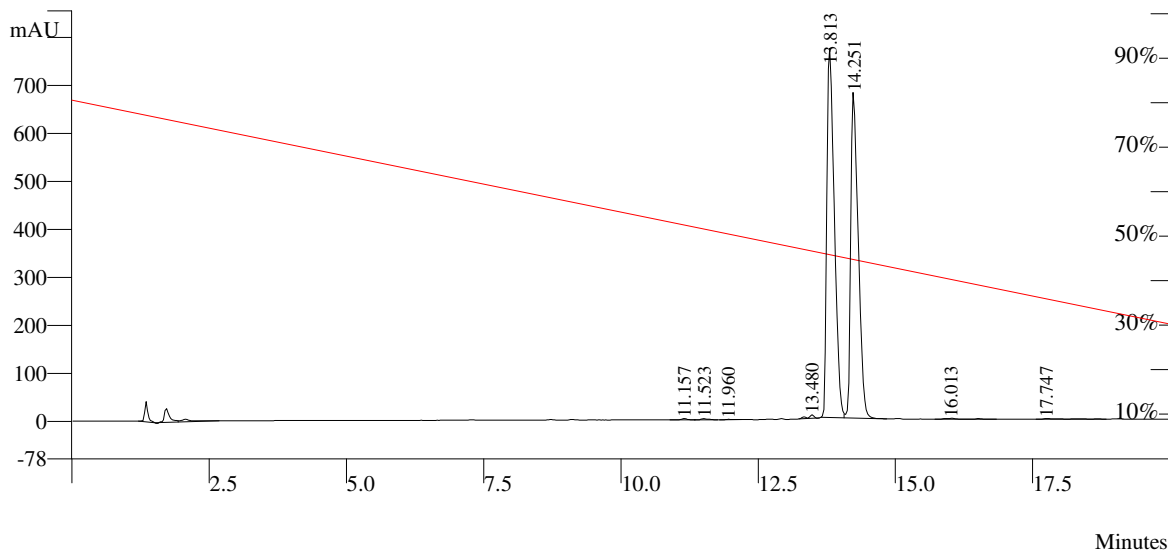

| Peak No | Result (%)     | Ret Time (min) | Rel Ret Time | Sep. Code | Width 1/2 (sec) | Peak Area (counts) | Peak Height (counts) |
|---------|----------------|----------------|--------------|-----------|-----------------|--------------------|----------------------|
| 1       | 0.1299         | 11.157         | 0.00         | BV        | 5.6             | 93122              | 14856                |
| 2       | 0.1462         | 11.523         | 0.00         | VB        | 10.2            | 104835             | 12133                |
| 3       | 0.0207         | 11.960         | 0.00         | BB        | 10.3            | 14862              | 3205                 |
| 4       | 0.3827         | 13.480         | 0.00         | BB        | 5.5             | 274446             | 36394                |
| 5       | 52.4284        | 13.813         | 0.00         | BV        | 9.1             | 37593520           | 3941338              |
| 6       | 46.5007        | 14.251         | 0.00         | VB        | 9.0             | 33343112           | 3473717              |
| 7       | 0.2429         | 16.013         | 0.00         | BB        | 13.7            | 174190             | 9622                 |
| 8       | 0.1484         | 17.747         | 0.00         | BB        | 7.8             | 106443             | 7562                 |
|         | <b>99.9999</b> |                |              |           |                 | <b>71704528</b>    | <b>7498827</b>       |

**Method Notes**XTerra MS C-18, 5um, 3.9x150 mm column Compound **4d**  
30-50% Acetonitrile with 0.1% TFA- Water with 0.1% TFA, 1 mL/min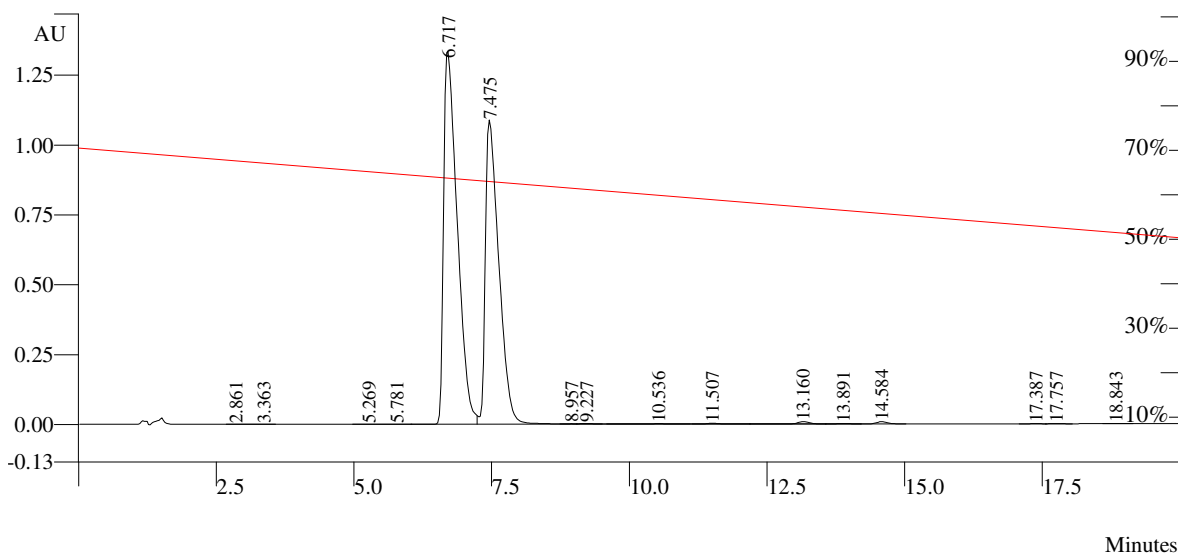

| Peak No        | Result (%) | Ret Time (min) | Rel Ret Time | Sep. Code | Width 1/2 (sec) | Peak Area (counts) | Peak Height (counts) |
|----------------|------------|----------------|--------------|-----------|-----------------|--------------------|----------------------|
| 1              | 0.0056     | 2.861          | 0.00         | BP        | 12.2            | 12097              | 1073                 |
| 2              | 0.0051     | 3.363          | 0.00         | PB        | 0.0             | 10995              | 960                  |
| 3              | 0.0075     | 5.269          | 0.00         | BP        | 11.5            | 16181              | 1478                 |
| 4              | 0.0096     | 5.781          | 0.00         | PV        | 16.3            | 20615              | 1564                 |
| 5              | 54.7631    | 6.717          | 0.00         | VV        | 16.2            | 117690464          | 6832873              |
| 6              | 44.3492    | 7.475          | 0.00         | VP        | 15.8            | 95310032           | 5574384              |
| 7              | 0.0149     | 8.957          | 0.00         | TF        | 0.0             | 31921              | 3074                 |
| 8              | 0.0545     | 9.227          | 0.00         | TF        | 0.0             | 117062             | 9107                 |
| 9              | 0.0464     | 10.536         | 0.00         | TS        | 0.0             | 99811              | 7874                 |
| 10             | 0.0921     | 11.507         | 0.00         | TF        | 0.0             | 198002             | 13038                |
| 11             | 0.2922     | 13.160         | 0.00         | TF        | 0.0             | 628011             | 43463                |
| 12             | 0.0585     | 13.891         | 0.00         | TF        | 0.0             | 125764             | 8650                 |
| 13             | 0.2543     | 14.584         | 0.00         | PB        | 0.0             | 546470             | 41334                |
| 14             | 0.0174     | 17.387         | 0.00         | BV        | 14.9            | 37482              | 2861                 |
| 15             | 0.0181     | 17.757         | 0.00         | VB        | 20.2            | 38895              | 2557                 |
| 16             | 0.0114     | 18.843         | 0.00         | BB        | 14.1            | 24489              | 1725                 |
| <b>99.9999</b> |            |                |              |           |                 | <b>214908288</b>   | <b>12546015</b>      |

**Method Notes**

XTerra MS C-18, 5um, 3.9 mm x 150 mm Compound **4e**  
20-70% Acetonitrile with 0.1 % TFA - Water with 0.1% TFA, 1 mL/min

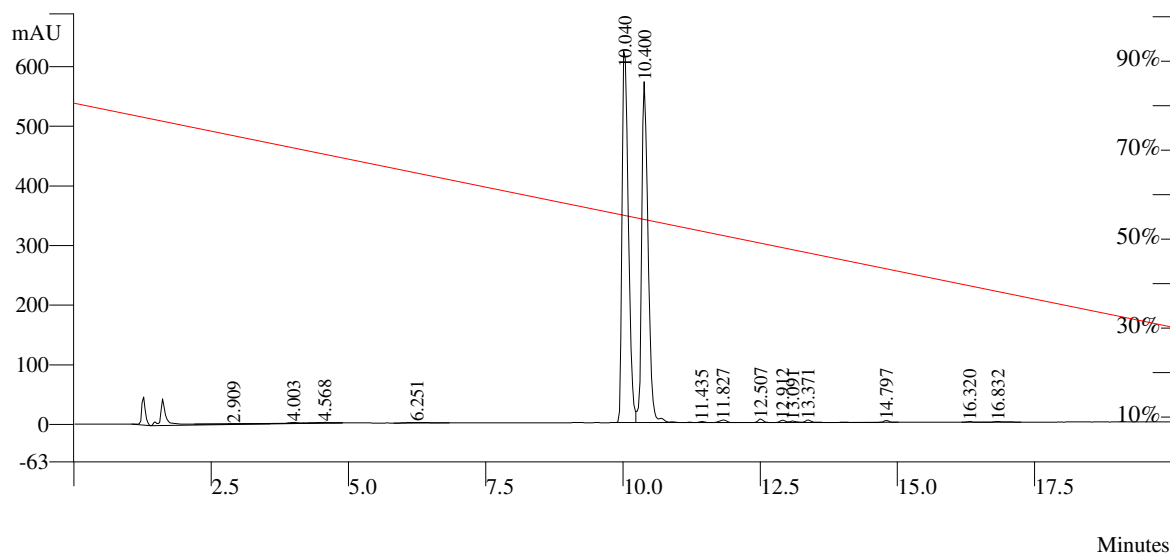

| Peak No | Result (%)      | Ret Time (min) | Rel Ret Time | Sep. Code | Width 1/2 (sec) | Peak Area (counts) | Peak Height (counts) |
|---------|-----------------|----------------|--------------|-----------|-----------------|--------------------|----------------------|
| 1       | 0.0321          | 2.909          | 0.00         | TF        | 0.0             | 16291              | 1038                 |
| 2       | 0.1535          | 4.003          | 0.00         | TF        | 0.0             | 78001              | 7577                 |
| 3       | 0.2432          | 4.568          | 0.00         | TF        | 0.0             | 123595             | 6313                 |
| 4       | 0.2706          | 6.251          | 0.00         | BB        | 0.0             | 137524             | 4627                 |
| 5       | 50.3593         | 10.040         | 0.00         | BV        | 7.5             | 25595768           | 3190548              |
| 6       | 46.7721         | 10.400         | 0.00         | VP        | 7.4             | 23772538           | 2929404              |
| 7       | 0.1526          | 11.435         | 0.00         | TS        | 0.0             | 77570              | 9492                 |
| 8       | 0.4219          | 11.827         | 0.00         | TS        | 0.0             | 214443             | 22779                |
| 9       | 0.3925          | 12.507         | 0.00         | PV        | 0.0             | 199512             | 29559                |
| 10      | 0.2832          | 12.912         | 0.00         | VV        | 0.0             | 143938             | 20308                |
| 11      | 0.1804          | 13.091         | 0.00         | VV        | 0.0             | 91692              | 12219                |
| 12      | 0.3159          | 13.371         | 0.00         | VP        | 0.0             | 160582             | 20648                |
| 13      | 0.1899          | 14.797         | 0.00         | PB        | 0.0             | 96532              | 15476                |
| 14      | 0.0784          | 16.320         | 0.00         | BP        | 6.6             | 39852              | 5695                 |
| 15      | 0.1544          | 16.832         | 0.00         | PB        | 11.4            | 78486              | 6241                 |
|         | <b>100.0000</b> |                |              |           |                 | <b>50826328</b>    | <b>6281924</b>       |

**Method Notes**

XTerra MS C-18, 5um, 3.9 mm x 150 mm Compound **4f**  
20-70% Acetonitrile with 0.1 % TFA - Water with 0.1% TFA, 1 mL/min

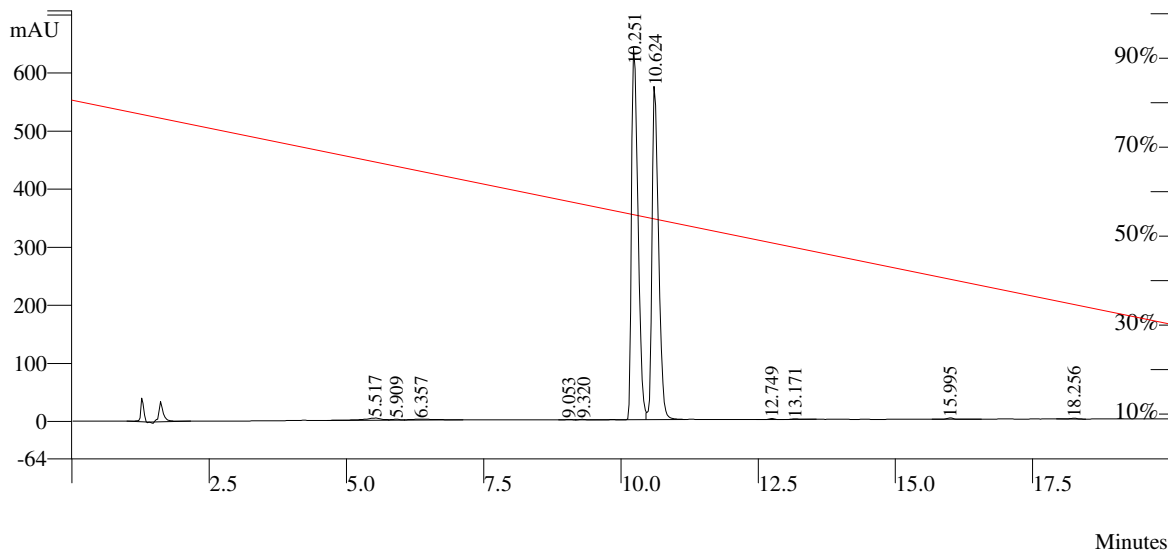

| Peak No | Result (%)     | Ret Time (min) | Rel Ret Time | Sep. Code | Width 1/2 (sec) | Peak Area (counts) | Peak Height (counts) |
|---------|----------------|----------------|--------------|-----------|-----------------|--------------------|----------------------|
| 1       | 0.7523         | 5.517          | 0.00         | BV        | 17.0            | 394966             | 18805                |
| 2       | 0.1599         | 5.909          | 0.00         | VV        | 14.7            | 83973              | 8630                 |
| 3       | 0.4467         | 6.357          | 0.00         | VB        | 0.0             | 234515             | 7977                 |
| 4       | 0.0553         | 9.053          | 0.00         | BV        | 6.2             | 29056              | 4417                 |
| 5       | 0.0542         | 9.320          | 0.00         | VP        | 6.7             | 28436              | 3657                 |
| 6       | 51.1678        | 10.251         | 0.00         | PV        | 7.8             | 26864188           | 3276966              |
| 7       | 46.7652        | 10.624         | 0.00         | VB        | 7.7             | 24552740           | 2940130              |
| 8       | 0.1276         | 12.749         | 0.00         | BP        | 6.4             | 66992              | 8992                 |
| 9       | 0.1266         | 13.171         | 0.00         | PB        | 9.6             | 66487              | 6402                 |
| 10      | 0.2113         | 15.995         | 0.00         | BB        | 6.9             | 110945             | 13073                |
| 11      | 0.1330         | 18.256         | 0.00         | BB        | 8.2             | 69810              | 7123                 |
|         | <b>99.9999</b> |                |              |           |                 | <b>52502104</b>    | <b>6296172</b>       |

**Method Notes**

XTerra MS C-18, 5um, 3.9 mm x 150 mm Compound **4g**  
20-70% Acetonitrile with 0.1 % TFA - Water with 0.1% TFA, 1 mL/min

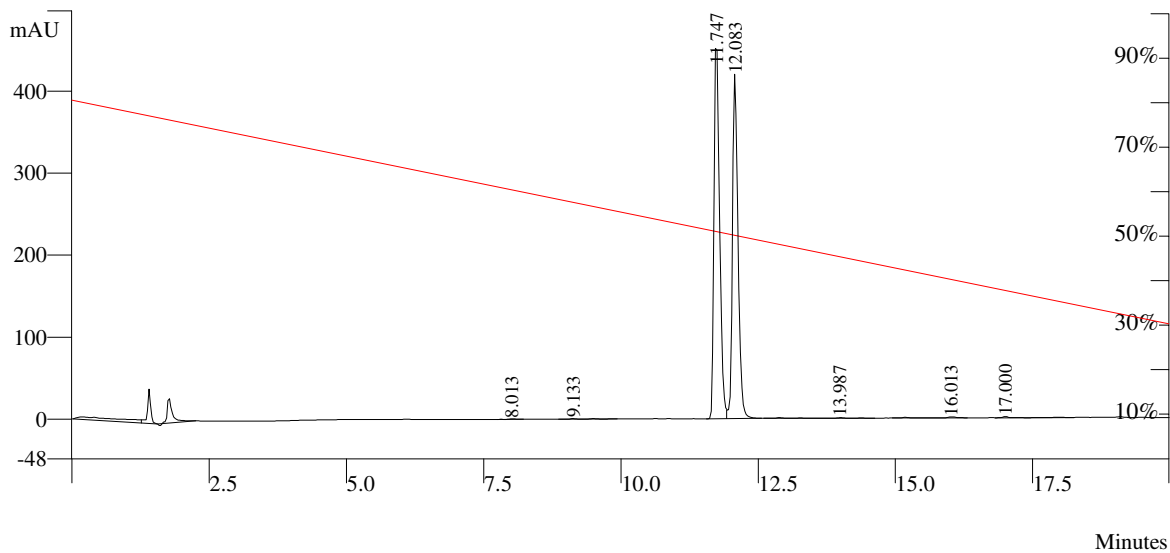

| Peak No         | Result (%) | Ret Time (min) | Rel Ret Time | Sep. Code | Width 1/2 (sec) | Peak Area (counts) | Peak Height (counts) |
|-----------------|------------|----------------|--------------|-----------|-----------------|--------------------|----------------------|
| 1               | 0.0765     | 8.013          | 0.00         | BB        | 7.9             | 24677              | 3252                 |
| 2               | 0.1097     | 9.133          | 0.00         | BB        | 5.7             | 35402              | 3608                 |
| 3               | 52.0175    | 11.747         | 0.00         | BV        | 6.7             | 16788882           | 2314297              |
| 4               | 47.3675    | 12.083         | 0.00         | VB        | 6.6             | 15288089           | 2151137              |
| 5               | 0.0729     | 13.987         | 0.00         | BB        | 5.7             | 23525              | 4419                 |
| 6               | 0.2185     | 16.013         | 0.00         | BB        | 9.7             | 70507              | 6426                 |
| 7               | 0.1375     | 17.000         | 0.00         | BB        | 6.1             | 44390              | 7632                 |
| <b>100.0001</b> |            |                |              |           |                 | <b>32275470</b>    | <b>4490771</b>       |



**Method Notes**

XTerra MS C-18, 5um, 3.9x150 mm column Compound **5a**  
30-60% Acetonitrile with 0.1% TFA- Water with 0.1% TFA, 1 mL/min

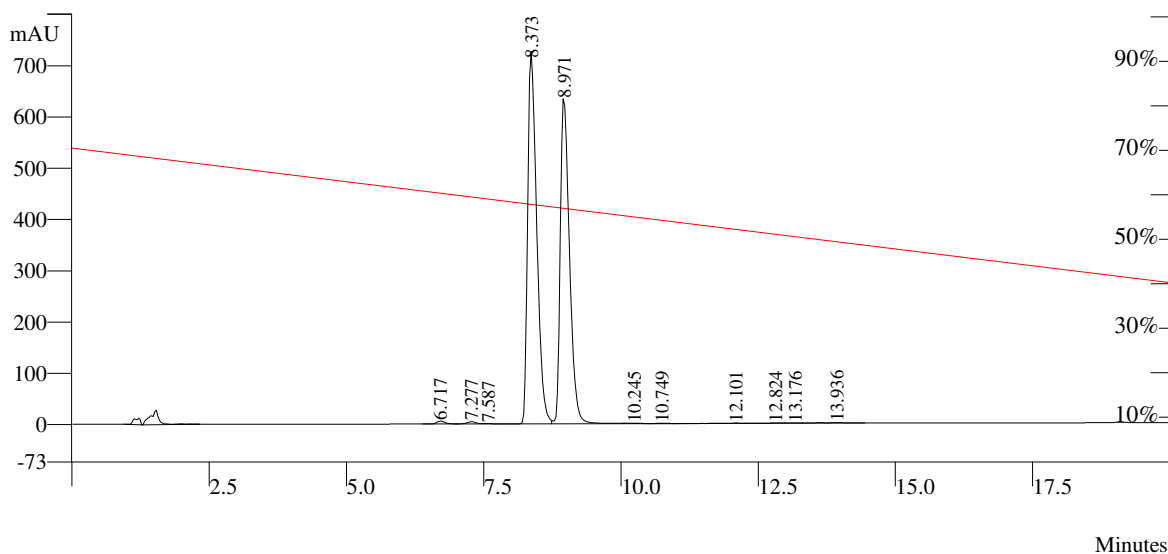

| Peak No | Result (%)      | Ret Time (min) | Rel Ret Time | Sep. Code | Width 1/2 (sec) | Peak Area (counts) | Peak Height (counts) |
|---------|-----------------|----------------|--------------|-----------|-----------------|--------------------|----------------------|
| 1       | 0.3688          | 6.717          | 0.00         | BV        | 9.6             | 300588             | 29082                |
| 2       | 0.3142          | 7.277          | 0.00         | VV        | 9.8             | 256043             | 23141                |
| 3       | 0.0205          | 7.587          | 0.00         | VP        | 9.6             | 16745              | 1910                 |
| 4       | 52.1697         | 8.373          | 0.00         | PV        | 10.7            | 42515264           | 3721851              |
| 5       | 46.7194         | 8.971          | 0.00         | VP        | 10.9            | 38073636           | 3246045              |
| 6       | 0.0369          | 10.245         | 0.00         | TS        | 0.0             | 30058              | 2713                 |
| 7       | 0.0325          | 10.749         | 0.00         | TS        | 0.0             | 26507              | 2044                 |
| 8       | 0.0254          | 12.101         | 0.00         | PV        | 0.0             | 20687              | 2759                 |
| 9       | 0.0627          | 12.824         | 0.00         | VV        | 0.0             | 51095              | 3235                 |
| 10      | 0.0567          | 13.176         | 0.00         | VV        | 0.0             | 46204              | 3588                 |
| 11      | 0.1932          | 13.936         | 0.00         | VB        | 0.0             | 157426             | 3583                 |
|         | <b>100.0000</b> |                |              |           |                 | <b>81494240</b>    | <b>7039951</b>       |

**Method Notes**XTerra MS C-18, 5um, 3.9x150 mm column Compound **5b**  
30-60% Acetonitrile with 0.1% TFA- Water with 0.1% TFA, 1 mL/min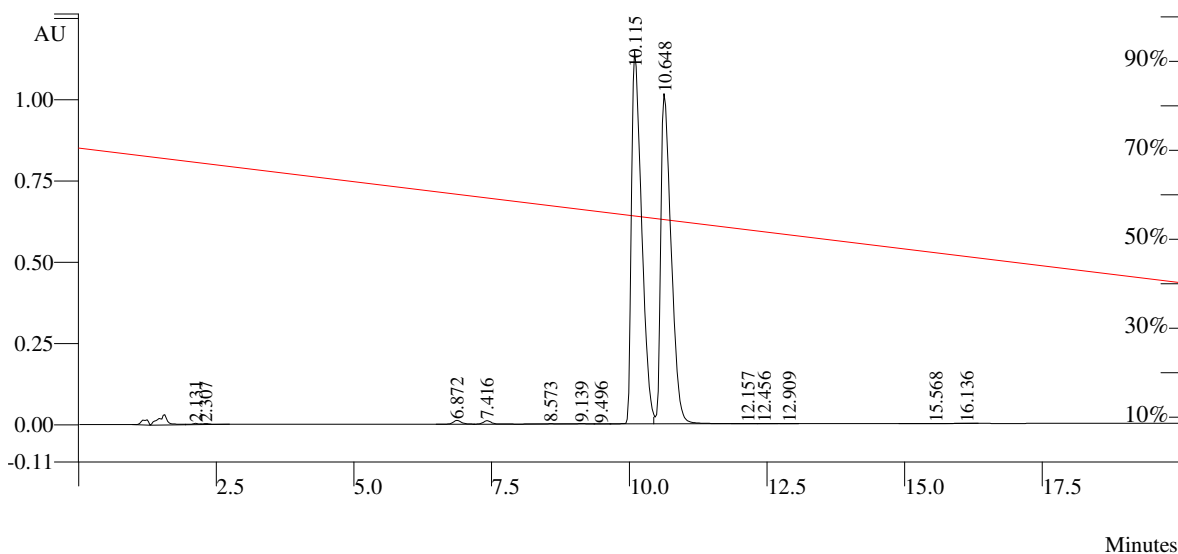

| Peak No | Result (%) | Ret Time (min) | Rel Ret Time | Sep. Code | Width 1/2 (sec) | Peak Area (counts) | Peak Height (counts) |
|---------|------------|----------------|--------------|-----------|-----------------|--------------------|----------------------|
| 1       | 0.1448     | 2.131          | 0.00         | VV        | 7.7             | 210849             | 20457                |
| 2       | 0.1307     | 2.307          | 0.00         | VB        | 9.0             | 190351             | 17444                |
| 3       | 0.3995     | 6.872          | 0.00         | BV        | 9.1             | 581566             | 58628                |
| 4       | 0.3667     | 7.416          | 0.00         | VP        | 9.3             | 533835             | 52671                |
| 5       | 0.0411     | 8.573          | 0.00         | PP        | 11.5            | 59784              | 5965                 |
| 6       | 0.0524     | 9.139          | 0.00         | PV        | 13.9            | 76301              | 6667                 |
| 7       | 0.0163     | 9.496          | 0.00         | VV        | 0.0             | 23717              | 2264                 |
| 8       | 51.6030    | 10.115         | 0.00         | VV        | 12.0            | 75129176           | 5876753              |
| 9       | 47.1527    | 10.648         | 0.00         | VB        | 12.2            | 68650064           | 5206575              |
| 10      | 0.0345     | 12.157         | 0.00         | TF        | 0.0             | 50256              | 3734                 |
| 11      | 0.0184     | 12.456         | 0.00         | TF        | 0.0             | 26741              | 2308                 |
| 12      | 0.0044     | 12.909         | 0.00         | TS        | 0.0             | 6442               | 696                  |
| 13      | 0.0168     | 15.568         | 0.00         | BP        | 18.9            | 24475              | 1167                 |
| 14      | 0.0187     | 16.136         | 0.00         | PB        | 0.0             | 27264              | 1230                 |
|         |            |                |              |           |                 | <b>145590832</b>   | <b>11256559</b>      |

**Method Notes**

XTerra MS C-18, 5um, 3.9x150 mm column Compound **5c**  
30-60% Acetonitrile with 0.1% TFA- Water with 0.1% TFA, 1 mL/min

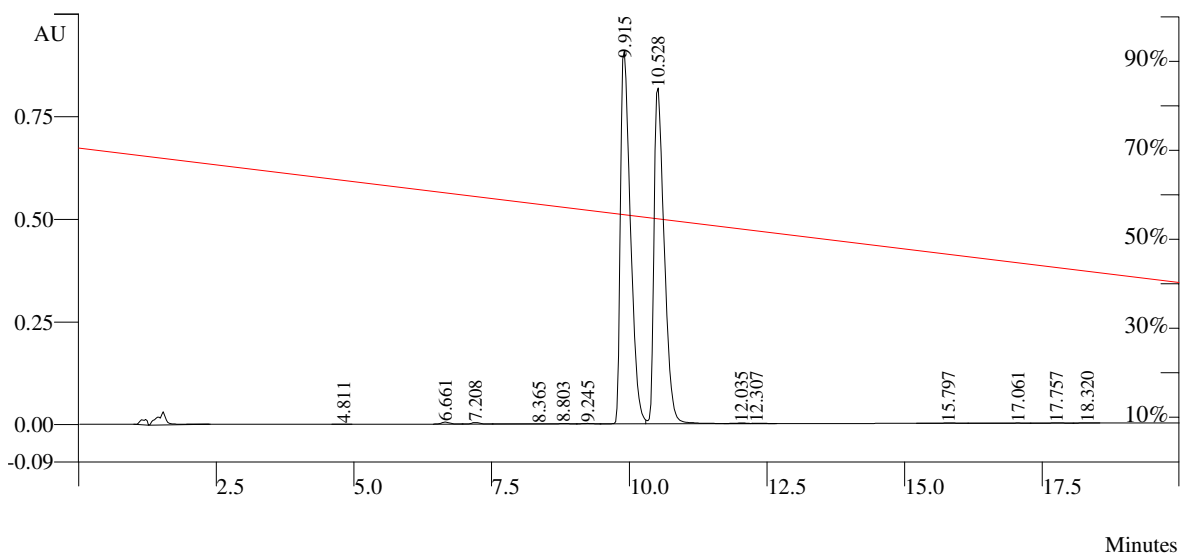

| Peak No         | Result (%) | Ret Time (min) | Rel Ret Time | Sep. Code | Width 1/2 (sec) | Peak Area (counts) | Peak Height (counts) |
|-----------------|------------|----------------|--------------|-----------|-----------------|--------------------|----------------------|
| 1               | 0.0057     | 4.811          | 0.00         | BB        | 0.0             | 6507               | 687                  |
| 2               | 0.2204     | 6.661          | 0.00         | BV        | 9.3             | 250811             | 24745                |
| 3               | 0.1699     | 7.208          | 0.00         | VV        | 9.4             | 193299             | 19124                |
| 4               | 0.0137     | 8.365          | 0.00         | VP        | 19.5            | 15570              | 1366                 |
| 5               | 0.0446     | 8.803          | 0.00         | PV        | 17.8            | 50786              | 4420                 |
| 6               | 0.0488     | 9.245          | 0.00         | VV        | 13.8            | 55495              | 5343                 |
| 7               | 51.6434    | 9.915          | 0.00         | VV        | 11.8            | 58761424           | 4650629              |
| 8               | 47.5653    | 10.528         | 0.00         | VB        | 11.8            | 54121300           | 4193585              |
| 9               | 0.0781     | 12.035         | 0.00         | TF        | 0.0             | 88863              | 7387                 |
| 10              | 0.0245     | 12.307         | 0.00         | TF        | 0.0             | 27849              | 1615                 |
| 11              | 0.0857     | 15.797         | 0.00         | BV        | 15.0            | 97559              | 5443                 |
| 12              | 0.0544     | 17.061         | 0.00         | VV        | 0.0             | 61851              | 1675                 |
| 13              | 0.0299     | 17.757         | 0.00         | VV        | 0.0             | 34063              | 1682                 |
| 14              | 0.0156     | 18.320         | 0.00         | VB        | 0.0             | 17763              | 1320                 |
| <b>100.0000</b> |            |                |              |           |                 | <b>113783136</b>   | <b>8919021</b>       |

**Method Notes**XTerra MS C-18, 5um, 3.9 mm x 150 mm Compound **5d**  
20-70% Acetonitrile with 0.1 % TFA - Water with 0.1% TFA, 1 mL/min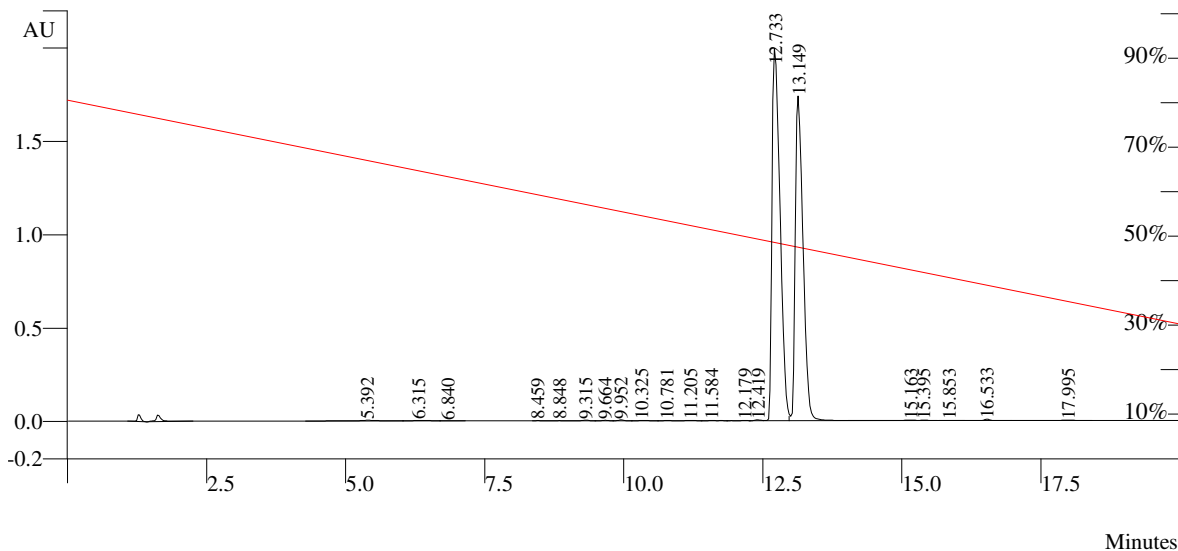

| Peak No         | Result (%) | Ret Time (min) | Rel Ret Time | Sep. Code | Width 1/2 (sec) | Peak Area (counts) | Peak Height (counts) |
|-----------------|------------|----------------|--------------|-----------|-----------------|--------------------|----------------------|
| 1               | 0.2721     | 5.392          | 0.00         | BV        | 20.0            | 521510             | 18955                |
| 2               | 0.1179     | 6.315          | 0.00         | VV        | 0.0             | 226009             | 8542                 |
| 3               | 0.0309     | 6.840          | 0.00         | VB        | 58.1            | 59155              | 4384                 |
| 4               | 0.0122     | 8.459          | 0.00         | BP        | 4.8             | 23431              | 4307                 |
| 5               | 0.0229     | 8.848          | 0.00         | PP        | 6.7             | 43947              | 4300                 |
| 6               | 0.0703     | 9.315          | 0.00         | PV        | 6.2             | 134701             | 18499                |
| 7               | 0.0518     | 9.664          | 0.00         | VV        | 5.8             | 99324              | 14552                |
| 8               | 0.0740     | 9.952          | 0.00         | VV        | 5.8             | 141859             | 21961                |
| 9               | 0.0451     | 10.325         | 0.00         | VV        | 6.4             | 86368              | 9282                 |
| 10              | 0.0366     | 10.781         | 0.00         | VP        | 6.1             | 70154              | 11035                |
| 11              | 0.0476     | 11.205         | 0.00         | PV        | 12.2            | 91159              | 7415                 |
| 12              | 0.0378     | 11.584         | 0.00         | VV        | 6.7             | 72395              | 6893                 |
| 13              | 0.0276     | 12.179         | 0.00         | VV        | 8.5             | 52980              | 4952                 |
| 14              | 0.0818     | 12.419         | 0.00         | VV        | 6.9             | 156806             | 23122                |
| 15              | 53.3255    | 12.733         | 0.00         | VV        | 9.6             | 102209296          | 10222125             |
| 16              | 45.2921    | 13.149         | 0.00         | VP        | 9.3             | 86811608           | 8906684              |
| 17              | 0.0499     | 15.163         | 0.00         | TF        | 0.0             | 95697              | 10082                |
| 18              | 0.0520     | 15.395         | 0.00         | TF        | 0.0             | 99662              | 9177                 |
| 19              | 0.0293     | 15.853         | 0.00         | TS        | 0.0             | 56152              | 7523                 |
| 20              | 0.1982     | 16.533         | 0.00         | PV        | 0.0             | 379886             | 36456                |
| 21              | 0.1244     | 17.995         | 0.00         | VB        | 0.0             | 238384             | 10009                |
| <b>100.0000</b> |            |                |              |           |                 | <b>191670496</b>   | <b>19360256</b>      |

**Method Notes**

XTerra MS C-18, 5um, 3.9x150 mm column Compound **5e**  
30-60% Acetonitrile with 0.1% TFA- Water with 0.1% TFA, 1 mL/min

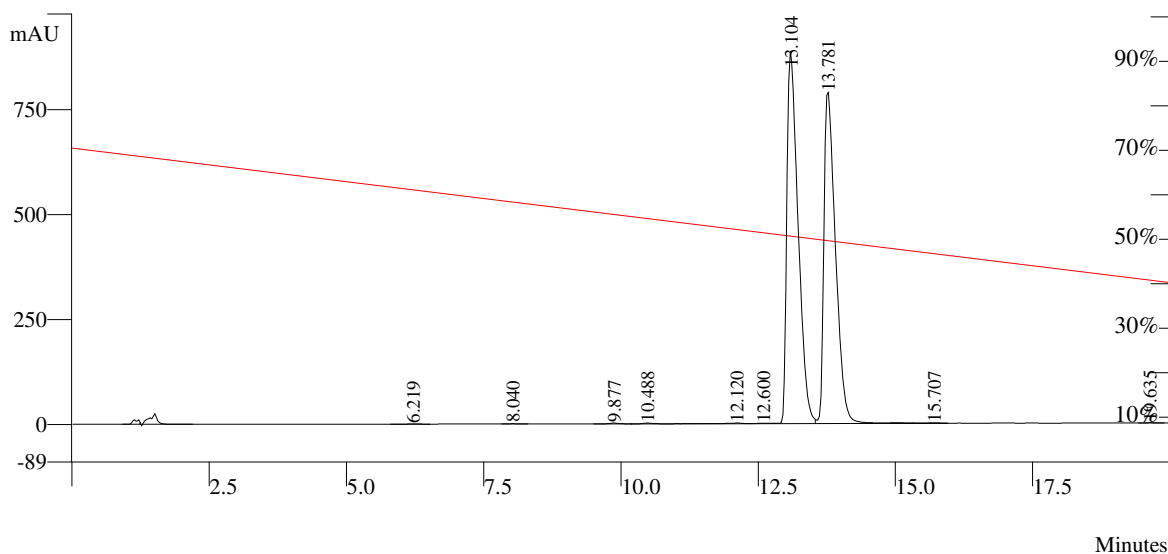

| Peak No         | Result (%) | Ret Time (min) | Rel Ret Time | Sep. Code | Width 1/2 (sec) | Peak Area (counts) | Peak Height (counts) |
|-----------------|------------|----------------|--------------|-----------|-----------------|--------------------|----------------------|
| 1               | 0.0212     | 6.219          | 0.00         | BB        | 14.7            | 26374              | 1995                 |
| 2               | 0.0266     | 8.040          | 0.00         | BB        | 10.9            | 33030              | 3052                 |
| 3               | 0.0844     | 9.877          | 0.00         | BV        | 10.2            | 104947             | 9515                 |
| 4               | 0.0746     | 10.488         | 0.00         | VP        | 10.4            | 92777              | 8790                 |
| 5               | 0.0847     | 12.120         | 0.00         | PV        | 23.4            | 105332             | 6883                 |
| 6               | 0.0583     | 12.600         | 0.00         | VV        | 17.6            | 72556              | 5488                 |
| 7               | 51.8248    | 13.104         | 0.00         | VV        | 13.3            | 64454060           | 4540041              |
| 8               | 47.7843    | 13.781         | 0.00         | VB        | 13.6            | 59428928           | 4040021              |
| 9               | 0.0184     | 15.707         | 0.00         | TS        | 0.0             | 22831              | 3044                 |
| 10              | 0.0228     | 19.635         | 0.00         | BB        | 11.2            | 28295              | 2442                 |
|                 |            |                |              |           |                 | <b>124369128</b>   | <b>8621271</b>       |
| <b>100.0001</b> |            |                |              |           |                 |                    |                      |

**Method Notes**XTerra MS C-18, 5um, 3.9x150 mm column Compound **5f**  
30-60% Acetonitrile with 0.1% TFA- Water with 0.1% TFA, 1 mL/min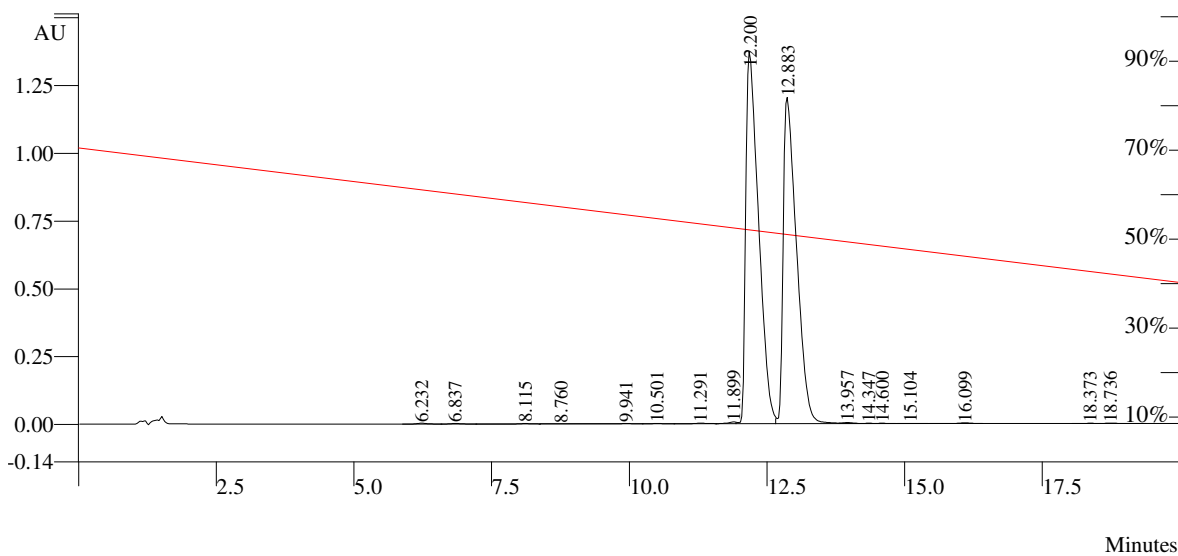

| Peak No         | Result (%) | Ret Time (min) | Rel Ret Time | Sep. Code | Width 1/2 (sec) | Peak Area (counts) | Peak Height (counts) |
|-----------------|------------|----------------|--------------|-----------|-----------------|--------------------|----------------------|
| 1               | 0.0958     | 6.232          | 0.00         | BV        | 11.5            | 210189             | 17108                |
| 2               | 0.0586     | 6.837          | 0.00         | VV        | 11.4            | 128597             | 10994                |
| 3               | 0.0390     | 8.115          | 0.00         | VV        | 12.2            | 85449              | 8031                 |
| 4               | 0.0331     | 8.760          | 0.00         | VP        | 24.8            | 72619              | 4877                 |
| 5               | 0.0539     | 9.941          | 0.00         | PV        | 25.8            | 118129             | 7497                 |
| 6               | 0.0407     | 10.501         | 0.00         | VV        | 15.0            | 89313              | 8398                 |
| 7               | 0.0854     | 11.291         | 0.00         | VV        | 24.5            | 187364             | 11418                |
| 8               | 0.1488     | 11.899         | 0.00         | VV        | 13.4            | 326333             | 34256                |
| 9               | 51.7633    | 12.200         | 0.00         | VV        | 15.4            | 113542904          | 7039422              |
| 10              | 47.4813    | 12.883         | 0.00         | VB        | 15.8            | 104150296          | 6166047              |
| 11              | 0.0467     | 13.957         | 0.00         | TS        | 0.0             | 102369             | 10663                |
| 12              | 0.0099     | 14.347         | 0.00         | TF        | 0.0             | 21808              | 2004                 |
| 13              | 0.0163     | 14.600         | 0.00         | TF        | 0.0             | 35802              | 2712                 |
| 14              | 0.0118     | 15.104         | 0.00         | TS        | 0.0             | 25861              | 1986                 |
| 15              | 0.0744     | 16.099         | 0.00         | TS        | 0.0             | 163104             | 13318                |
| 16              | 0.0156     | 18.373         | 0.00         | BV        | 13.4            | 34175              | 2569                 |
| 17              | 0.0255     | 18.736         | 0.00         | VB        | 13.9            | 55897              | 3554                 |
|                 |            |                |              |           |                 | <b>219350224</b>   | <b>13344854</b>      |
| <b>100.0001</b> |            |                |              |           |                 |                    |                      |

**Method Notes**

XTerra MS C-18, 5um, 3.9 mm x 150 mm Compound **5g**  
 20-70% Acetonitrile with 0.1 % TFA - Water with 0.1% TFA, 1 mL/min

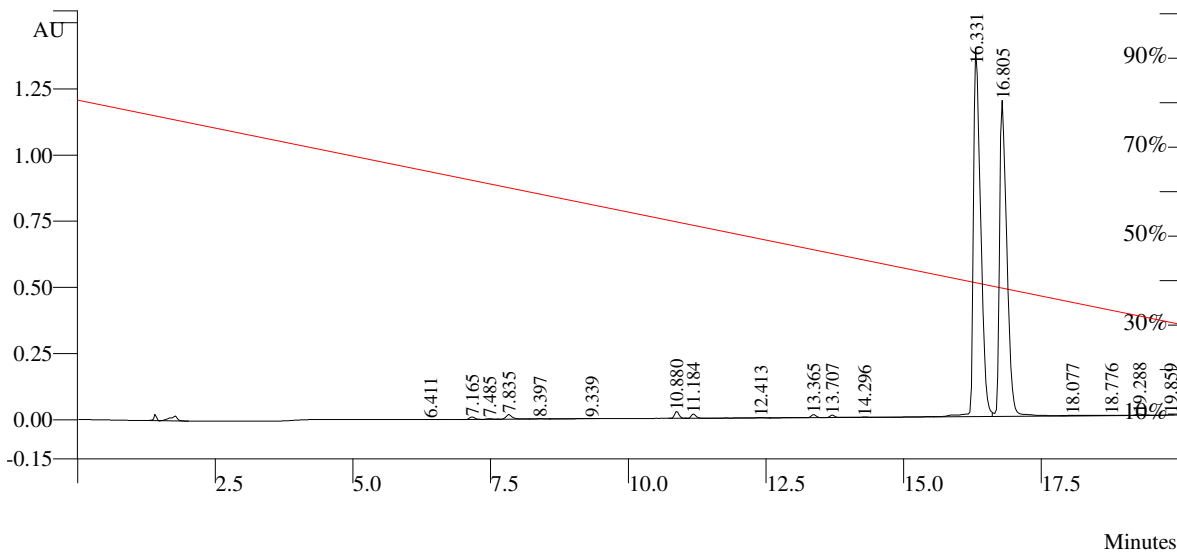

| Peak No | Result (%)      | Ret Time (min) | Rel Ret Time | Sep. Code | Width 1/2 (sec) | Peak Area (counts) | Peak Height (counts) |
|---------|-----------------|----------------|--------------|-----------|-----------------|--------------------|----------------------|
| 1       | 0.0176          | 6.411          | 0.00         | BB        | 5.9             | 22390              | 3418                 |
| 2       | 0.2823          | 7.165          | 0.00         | BV        | 6.6             | 359006             | 51731                |
| 3       | 0.0834          | 7.485          | 0.00         | VV        | 7.7             | 106086             | 15136                |
| 4       | 0.6150          | 7.835          | 0.00         | VV        | 7.0             | 782221             | 92410                |
| 5       | 0.0887          | 8.397          | 0.00         | VV        | 0.0             | 112874             | 10061                |
| 6       | 0.0943          | 9.339          | 0.00         | VB        | 0.0             | 119992             | 2756                 |
| 7       | 0.6037          | 10.880         | 0.00         | BV        | 5.4             | 767827             | 133541               |
| 8       | 0.3778          | 11.184         | 0.00         | VP        | 5.4             | 480479             | 81295                |
| 9       | 0.0462          | 12.413         | 0.00         | PV        | 32.0            | 58749              | 4887                 |
| 10      | 0.3041          | 13.365         | 0.00         | VP        | 7.4             | 386794             | 54961                |
| 11      | 0.2166          | 13.707         | 0.00         | PV        | 7.4             | 275539             | 45395                |
| 12      | 0.0685          | 14.296         | 0.00         | VP        | 0.0             | 87103              | 5007                 |
| 13      | 51.7056         | 16.331         | 0.00         | VV        | 8.5             | 65766360           | 7131405              |
| 14      | 45.2050         | 16.805         | 0.00         | VP        | 8.6             | 57498092           | 6112522              |
| 15      | 0.0426          | 18.077         | 0.00         | TF        | 0.0             | 54218              | 4289                 |
| 16      | 0.0386          | 18.776         | 0.00         | TF        | 0.0             | 49152              | 3040                 |
| 17      | 0.2004          | 19.288         | 0.00         | TF        | 0.0             | 254848             | 24524                |
| 18      | 0.0096          | 19.859         | 0.00         | PB        | 0.0             | 12261              | 3351                 |
|         | <b>100.0000</b> |                |              |           |                 | <b>127194000</b>   | <b>13779729</b>      |

**Method Notes**

XTerra MS C-18, 5um, 3.9x150 mm column Compound **5h**  
40-60% Acetonitrile with 0.1% TFA- Water with 0.1% TFA, 1 mL/min

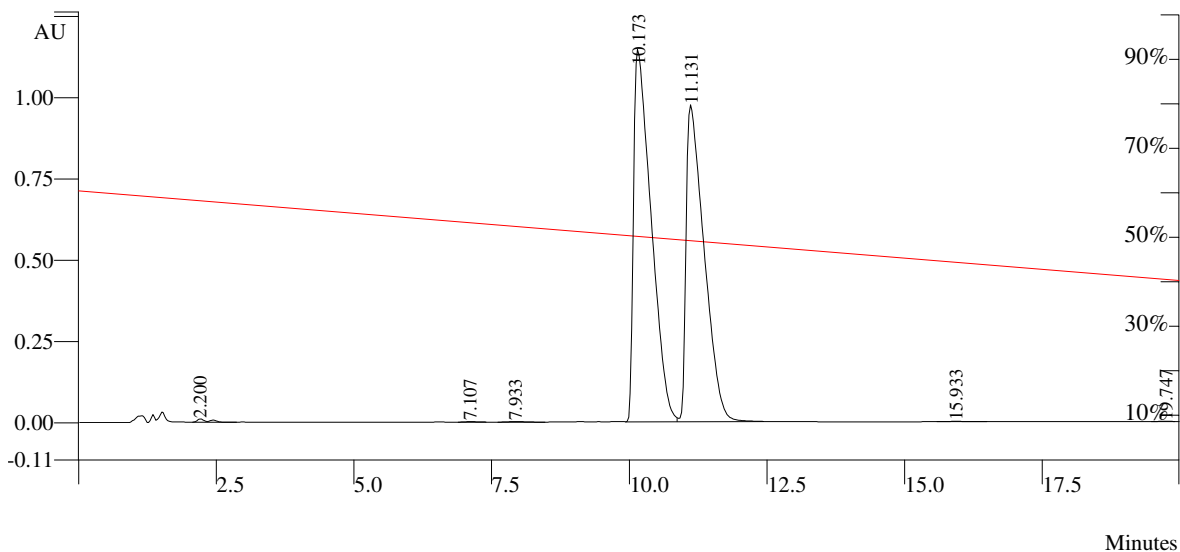

| Peak No | Result (%)      | Ret Time (min) | Rel Ret Time | Sep. Code | Width 1/2 (sec) | Peak Area (counts) | Peak Height (counts) |
|---------|-----------------|----------------|--------------|-----------|-----------------|--------------------|----------------------|
| 1       | 0.2816          | 2.200          | 0.00         | BB        | 7.5             | 690213             | 50673                |
| 2       | 0.0454          | 7.107          | 0.00         | BB        | 13.6            | 111358             | 7961                 |
| 3       | 0.0765          | 7.933          | 0.00         | BB        | 21.2            | 187414             | 8911                 |
| 4       | 53.0973         | 10.173         | 0.00         | BV        | 21.1            | 130160784          | 5872025              |
| 5       | 46.4307         | 11.131         | 0.00         | VB        | 21.6            | 113818368          | 4995556              |
| 6       | 0.0529          | 15.933         | 0.00         | BB        | 21.9            | 129601             | 5538                 |
| 7       | 0.0157          | 19.747         | 0.00         | BB        | 15.5            | 38433              | 2781                 |
|         | <b>100.0001</b> |                |              |           |                 | <b>245136160</b>   | <b>10943445</b>      |



**Method Notes**

XTerra MS C-18, 5um, 3.9 mm x 150 mm Compound **5i**  
20-70% Acetonitrile with 0.1 % TFA - Water with 0.1% TFA, 1 mL/min

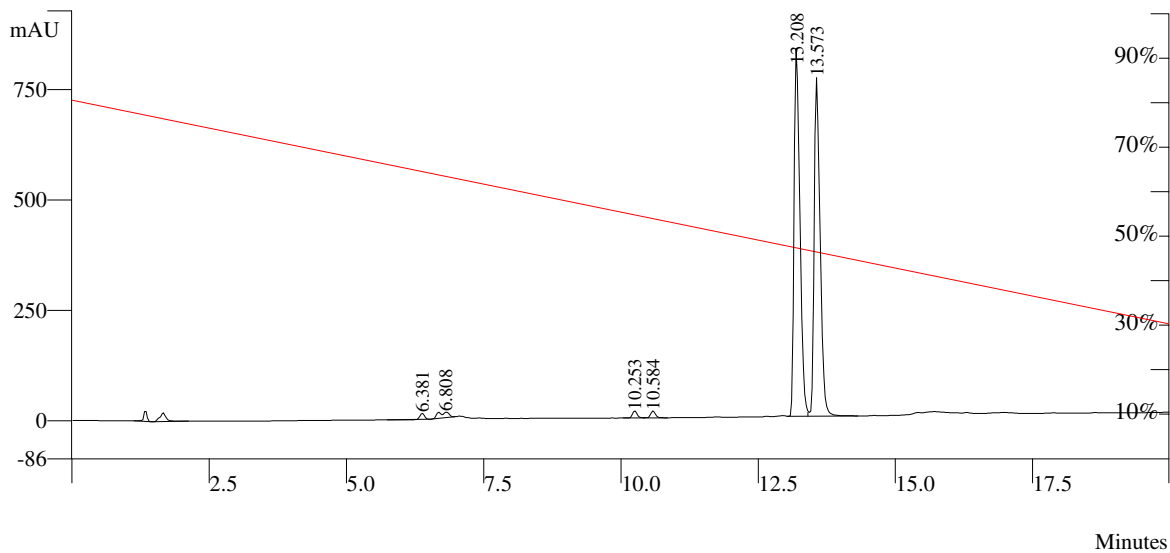

| Peak No         | Result (%) | Ret Time (min) | Rel Ret Time | Sep. Code | Width 1/2 (sec) | Peak Area (counts) | Peak Height (counts) |
|-----------------|------------|----------------|--------------|-----------|-----------------|--------------------|----------------------|
| 1               | 0.5569     | 6.381          | 0.00         | BP        | 5.9             | 354263             | 68133                |
| 2               | 1.4074     | 6.808          | 0.00         | PB        | 16.6            | 895342             | 66271                |
| 3               | 0.7721     | 10.253         | 0.00         | BV        | 5.4             | 491165             | 83034                |
| 4               | 0.7650     | 10.584         | 0.00         | VB        | 5.6             | 486648             | 79846                |
| 5               | 49.7041    | 13.208         | 0.00         | BV        | 6.9             | 31619608           | 4273018              |
| 6               | 46.7946    | 13.573         | 0.00         | VB        | 6.9             | 29768726           | 3928184              |
| <b>100.0001</b> |            |                |              |           |                 | <b>63615752</b>    | <b>8498486</b>       |

**Method Notes**XTerra MS C-18, 5um, 3.9x150 mm column Compound **5j**  
30-60% Acetonitrile with 0.1% TFA- Water with 0.1% TFA, 1 mL/min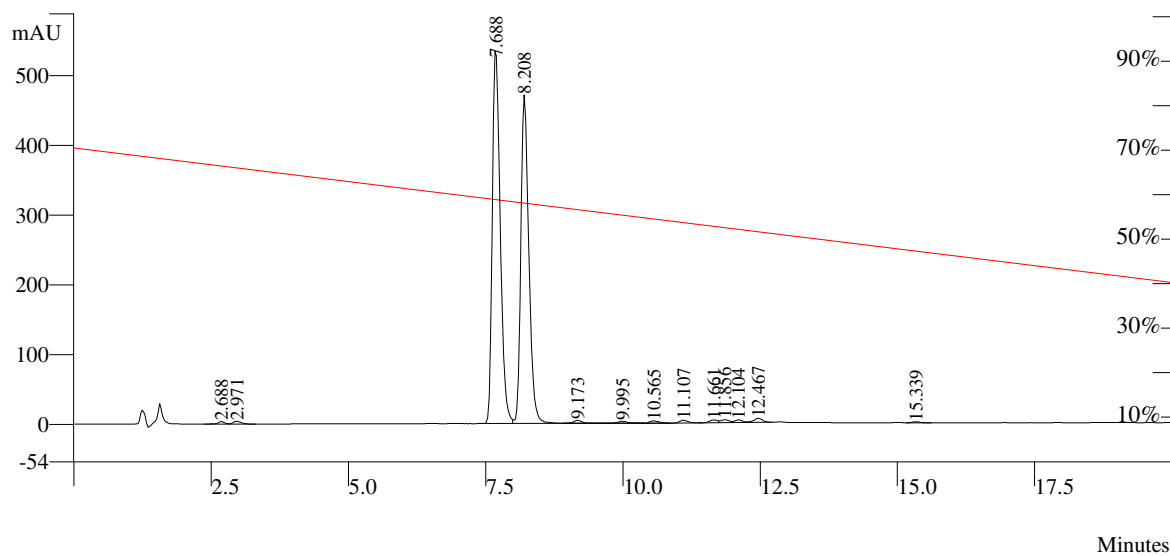

| Peak No | Result (%)     | Ret Time (min) | Rel Ret Time | Sep. Code | Width 1/2 (sec) | Peak Area (counts) | Peak Height (counts) |
|---------|----------------|----------------|--------------|-----------|-----------------|--------------------|----------------------|
| 1       | 0.3054         | 2.688          | 0.00         | BV        | 8.0             | 165891             | 18251                |
| 2       | 0.3841         | 2.971          | 0.00         | VB        | 9.6             | 208676             | 20072                |
| 3       | 50.8097        | 7.688          | 0.00         | BV        | 9.3             | 27601178           | 2733965              |
| 4       | 45.1284        | 8.208          | 0.00         | VP        | 9.3             | 24514964           | 2412045              |
| 5       | 0.3979         | 9.173          | 0.00         | TF        | 0.0             | 216155             | 20940                |
| 6       | 0.3150         | 9.995          | 0.00         | TF        | 0.0             | 171105             | 12763                |
| 7       | 0.3396         | 10.565         | 0.00         | TF        | 0.0             | 184487             | 16685                |
| 8       | 0.3779         | 11.107         | 0.00         | PV        | 0.0             | 205278             | 19996                |
| 9       | 0.3776         | 11.661         | 0.00         | VV        | 0.0             | 205112             | 20888                |
| 10      | 0.4294         | 11.856         | 0.00         | VV        | 0.0             | 233270             | 21596                |
| 11      | 0.3601         | 12.104         | 0.00         | VV        | 0.0             | 195600             | 18891                |
| 12      | 0.6278         | 12.467         | 0.00         | VB        | 0.0             | 341038             | 30648                |
| 13      | 0.1470         | 15.339         | 0.00         | BB        | 9.8             | 79877              | 7539                 |
|         | <b>99.9999</b> |                |              |           |                 | <b>54322636</b>    | <b>5354279</b>       |

**Method Notes**

XTerra MS C-18, 5um, 3.9 mm x 150 mm Compound **5k**  
20-70% Acetonitrile with 0.1 % TFA - Water with 0.1% TFA, 1 mL/min

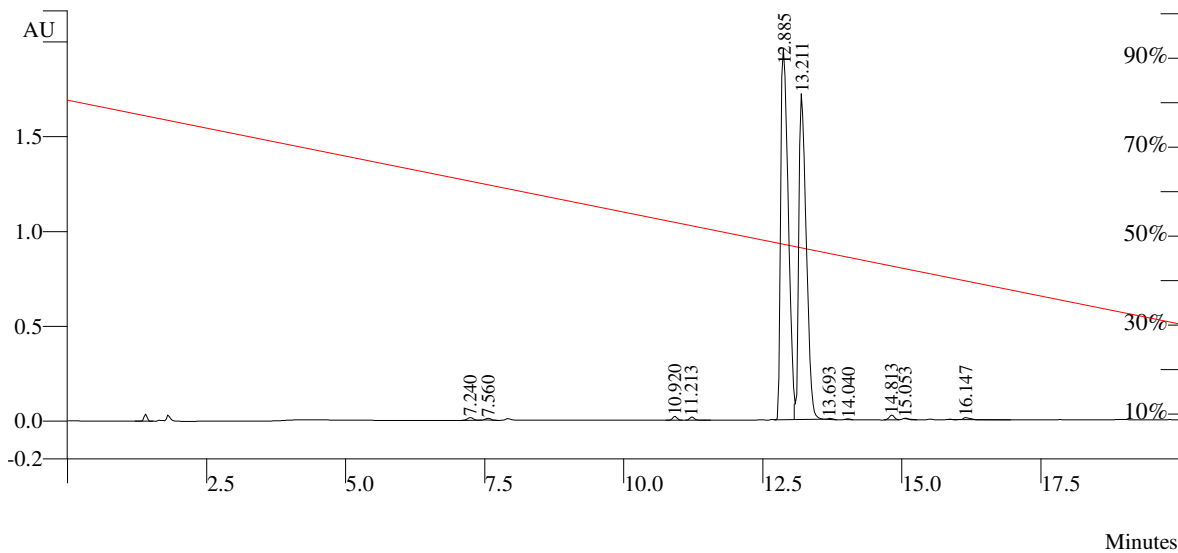

| Peak No | Result (%)     | Ret Time (min) | Rel Ret Time | Sep. Code | Width 1/2 (sec) | Peak Area (counts) | Peak Height (counts) |
|---------|----------------|----------------|--------------|-----------|-----------------|--------------------|----------------------|
| 1       | 0.2920         | 7.240          | 0.00         | BB        | 7.1             | 530883             | 76349                |
| 2       | 0.1422         | 7.560          | 0.00         | BB        | 5.6             | 258432             | 44371                |
| 3       | 0.3140         | 10.920         | 0.00         | BB        | 5.3             | 570850             | 101500               |
| 4       | 0.2736         | 11.213         | 0.00         | BB        | 5.3             | 497363             | 85203                |
| 5       | 52.3992        | 12.885         | 0.00         | BV        | 9.4             | 95252728           | 10034806             |
| 6       | 45.7698        | 13.211         | 0.00         | VB        | 8.8             | 83201568           | 8799541              |
| 7       | 0.0921         | 13.693         | 0.00         | BB        | 4.7             | 167426             | 28680                |
| 8       | 0.0658         | 14.040         | 0.00         | BB        | 4.8             | 119617             | 23529                |
| 9       | 0.4555         | 14.813         | 0.00         | BB        | 6.2             | 828068             | 129177               |
| 10      | 0.0131         | 15.053         | 0.00         | BB        | 2.9             | 23878              | 17122                |
| 11      | 0.1826         | 16.147         | 0.00         | BB        | 8.4             | 331987             | 56808                |
|         | <b>99.9999</b> |                |              |           |                 | <b>181782784</b>   | <b>19397086</b>      |

**Method Notes**XTerra MS C-18, 5um, 3.9 mm x 150 mm Compound **51**  
20-70% Acetonitrile with 0.1 % TFA - Water with 0.1% TFA, 1 mL/min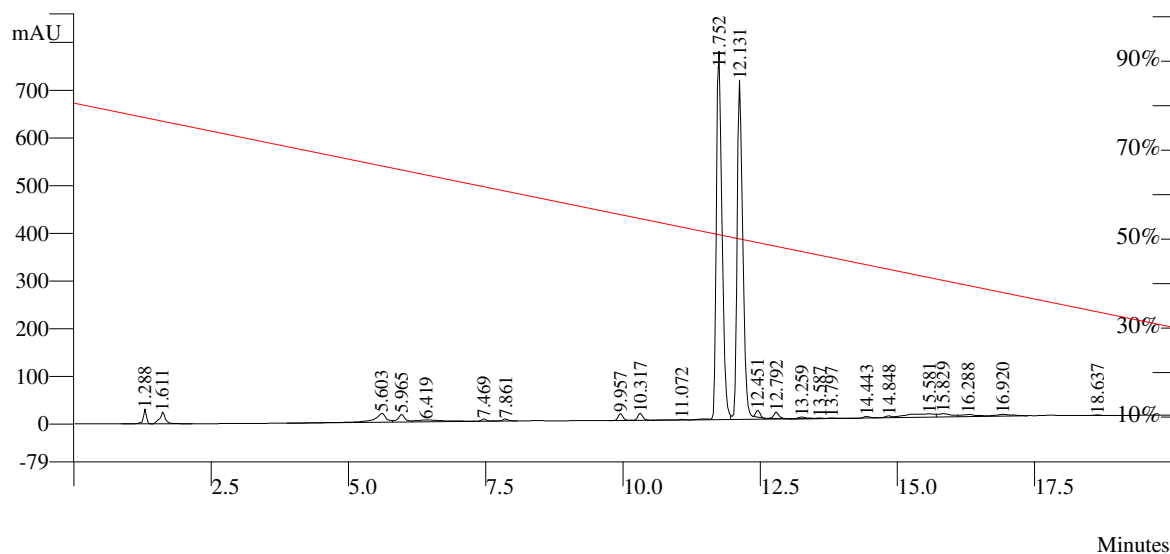

| Peak No | Result (%)      | Ret Time (min) | Rel Ret Time | Sep. Code | Width 1/2 (sec) | Peak Area (counts) | Peak Height (counts) |
|---------|-----------------|----------------|--------------|-----------|-----------------|--------------------|----------------------|
| 1       | 1.0401          | 5.613          | 0.00         | BV        | 7.4             | 923552             | 104287               |
| 2       | 0.7519          | 5.968          | 0.00         | VB        | 6.6             | 667621             | 96080                |
| 3       | 0.2200          | 7.467          | 0.00         | BV        | 5.9             | 195351             | 30388                |
| 4       | 0.2037          | 7.861          | 0.00         | VB        | 5.8             | 180902             | 29138                |
| 5       | 0.3212          | 9.957          | 0.00         | BV        | 5.8             | 285165             | 45290                |
| 6       | 0.3329          | 10.317         | 0.00         | VV        | 5.8             | 295596             | 45683                |
| 7       | 0.0947          | 11.069         | 0.00         | VV        | 7.2             | 84056              | 8499                 |
| 8       | 0.0776          | 11.387         | 0.00         | VV        | 10.9            | 68890              | 6342                 |
| 9       | 49.7080         | 11.752         | 0.00         | VV        | 6.6             | 44137616           | 6163506              |
| 10      | 46.0126         | 12.133         | 0.00         | VP        | 6.6             | 40856252           | 5598505              |
| 11      | 0.3170          | 12.792         | 0.00         | TS        | 0.0             | 281481             | 42294                |
| 12      | 0.1527          | 13.232         | 0.00         | TF        | 0.0             | 135567             | 16339                |
| 13      | 0.0956          | 13.587         | 0.00         | TF        | 0.0             | 84863              | 12267                |
| 14      | 0.0896          | 13.797         | 0.00         | TF        | 0.0             | 79527              | 10618                |
| 15      | 0.1017          | 14.445         | 0.00         | TF        | 0.0             | 90329              | 13279                |
| 16      | 0.1449          | 14.821         | 0.00         | TF        | 0.0             | 128649             | 11906                |
| 17      | 0.1310          | 15.227         | 0.00         | TF        | 0.0             | 116311             | 13280                |
| 18      | 0.0882          | 15.851         | 0.00         | PP        | 0.0             | 78297              | 9063                 |
| 19      | 0.1168          | 16.296         | 0.00         | PB        | 0.0             | 103692             | 9876                 |
|         | <b>100.0002</b> |                |              |           |                 | <b>88793712</b>    | <b>12266640</b>      |

**Method Notes**XTerra MS C-18, 5um, 3.9x150 mm column Compound **5m**

30-60% Acetonitrile with 0.1% TFA- Water with 0.1% TFA, 1 mL/min

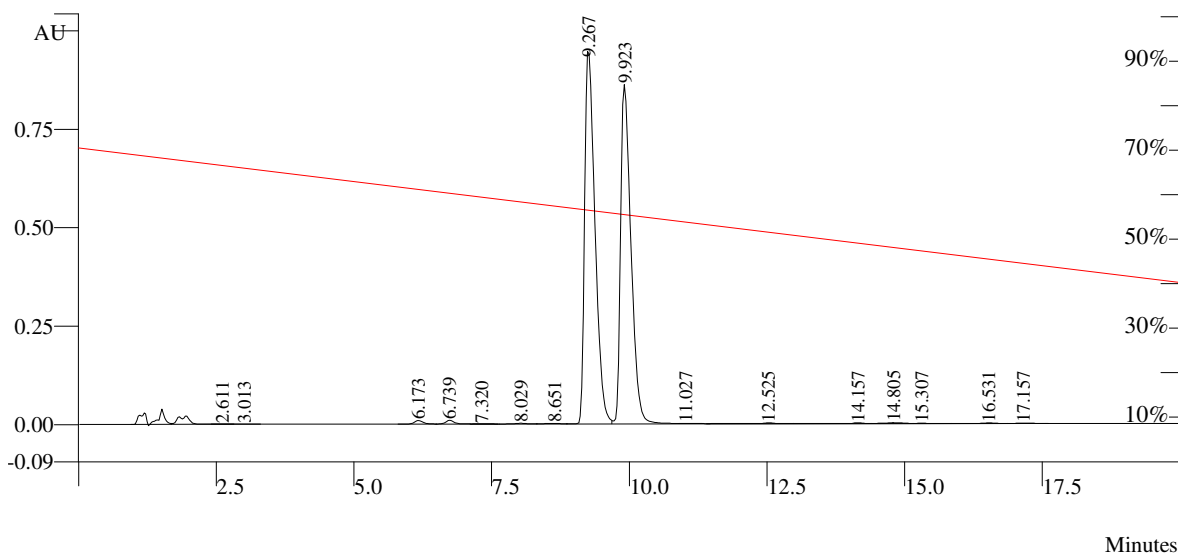

| Peak No | Result (%)     | Ret Time (min) | Rel Ret Time | Sep. Code | Width 1/2 (sec) | Peak Area (counts) | Peak Height (counts) |
|---------|----------------|----------------|--------------|-----------|-----------------|--------------------|----------------------|
| 1       | 0.0207         | 2.611          | 0.00         | TS        | 0.0             | 25753              | 2753                 |
| 2       | 0.0158         | 3.013          | 0.00         | PB        | 0.0             | 19685              | 1910                 |
| 3       | 0.3863         | 6.173          | 0.00         | BV        | 9.6             | 480097             | 45169                |
| 4       | 0.4046         | 6.739          | 0.00         | VP        | 9.6             | 502855             | 46897                |
| 5       | 0.0217         | 7.320          | 0.00         | TS        | 0.0             | 26970              | 2595                 |
| 6       | 0.0927         | 8.029          | 0.00         | PV        | 13.0            | 115259             | 8495                 |
| 7       | 0.1001         | 8.651          | 0.00         | VV        | 28.8            | 124421             | 5735                 |
| 8       | 51.2168        | 9.267          | 0.00         | VV        | 12.2            | 63658336           | 4849031              |
| 9       | 46.9516        | 9.923          | 0.00         | VB        | 12.2            | 58357048           | 4414676              |
| 10      | 0.0119         | 11.027         | 0.00         | TS        | 0.0             | 14797              | 1646                 |
| 11      | 0.1748         | 12.525         | 0.00         | TF        | 0.0             | 217296             | 10085                |
| 12      | 0.1219         | 14.157         | 0.00         | TF        | 0.0             | 151556             | 11249                |
| 13      | 0.2270         | 14.805         | 0.00         | TF        | 0.0             | 282187             | 12051                |
| 14      | 0.0595         | 15.307         | 0.00         | TF        | 0.0             | 73950              | 5082                 |
| 15      | 0.1037         | 16.531         | 0.00         | TF        | 0.0             | 128887             | 7567                 |
| 16      | 0.0907         | 17.157         | 0.00         | TF        | 0.0             | 112793             | 5213                 |
|         | <b>99.9998</b> |                |              |           |                 | <b>124291896</b>   | <b>9430154</b>       |

**Method Notes**

XTerra MS C-18, 5um, 3.9 mm x 150 mm Compound **5n**  
20-70% Acetonitrile with 0.1 % TFA - Water with 0.1% TFA, 1 mL/min

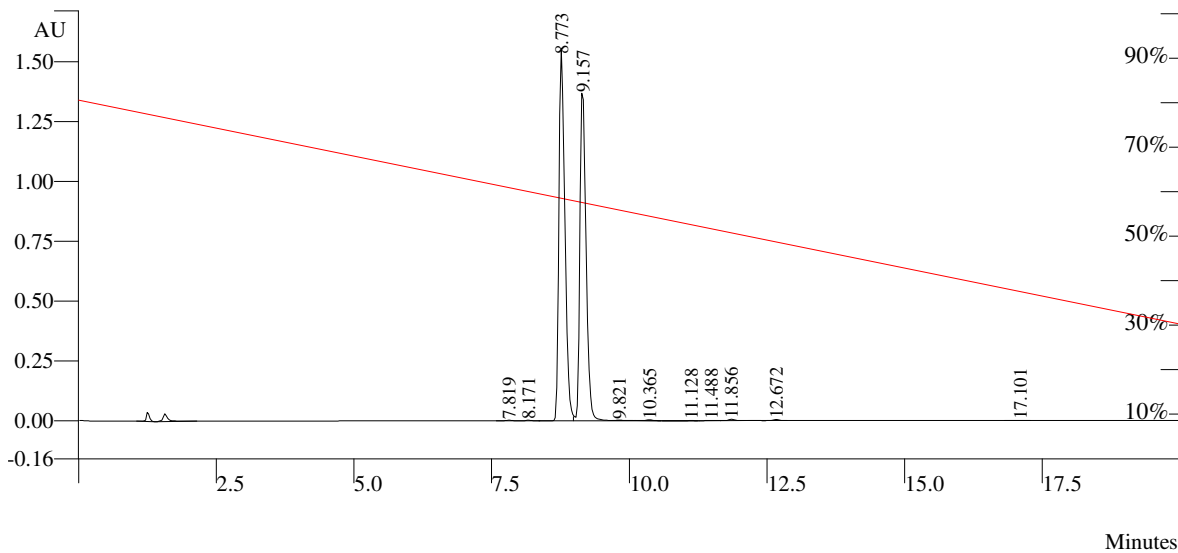

| Peak No         | Result (%) | Ret Time (min) | Rel Ret Time | Sep. Code | Width 1/2 (sec) | Peak Area (counts) | Peak Height (counts) |
|-----------------|------------|----------------|--------------|-----------|-----------------|--------------------|----------------------|
| 1               | 0.0874     | 7.819          | 0.00         | BP        | 8.6             | 101718             | 11103                |
| 2               | 0.0642     | 8.171          | 0.00         | PV        | 6.1             | 74652              | 11071                |
| 3               | 51.8717    | 8.773          | 0.00         | VV        | 7.2             | 60360768           | 7981299              |
| 4               | 47.3328    | 9.157          | 0.00         | VP        | 7.2             | 55079088           | 7019504              |
| 5               | 0.0536     | 9.821          | 0.00         | TS        | 0.0             | 62315              | 6616                 |
| 6               | 0.1441     | 10.365         | 0.00         | TS        | 0.0             | 167639             | 18761                |
| 7               | 0.0155     | 11.128         | 0.00         | TS        | 0.0             | 18079              | 3065                 |
| 8               | 0.0393     | 11.488         | 0.00         | PV        | 0.0             | 45726              | 3823                 |
| 9               | 0.2161     | 11.856         | 0.00         | VP        | 0.0             | 251449             | 29939                |
| 10              | 0.1456     | 12.672         | 0.00         | PB        | 0.0             | 169485             | 21880                |
| 11              | 0.0298     | 17.101         | 0.00         | BB        | 0.0             | 34695              | 3050                 |
| <b>100.0001</b> |            |                |              |           |                 | <b>116365616</b>   | <b>15110111</b>      |

**Method Notes**

XTerra MS C-18, 5um, 3.9 mm x 150 mm Compound **5o**  
20-70% Acetonitrile with 0.1 % TFA - Water with 0.1% TFA, 1 mL/min

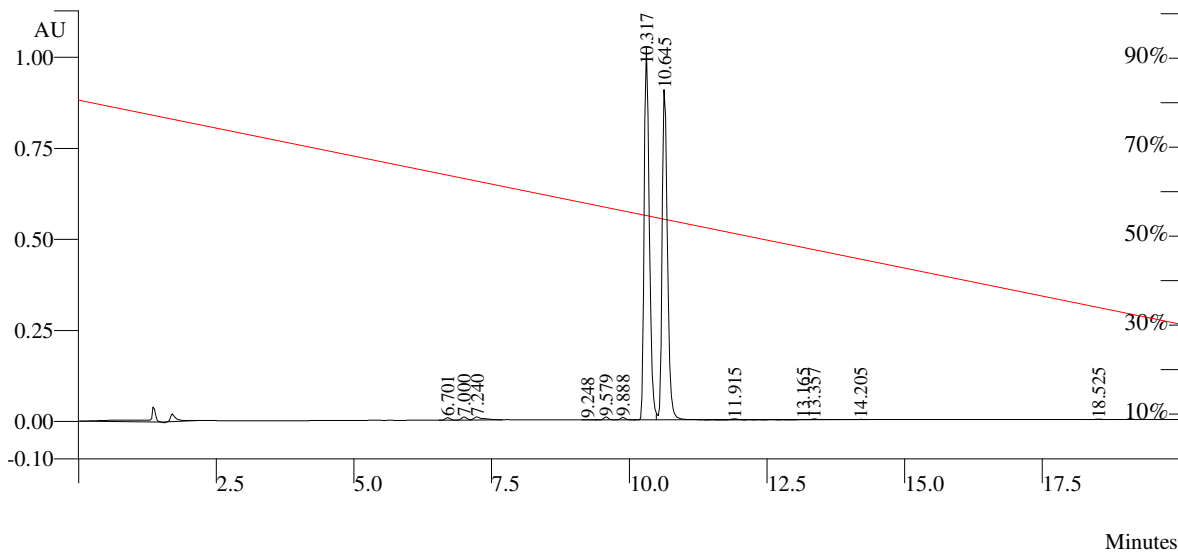

| Peak No         | Result (%) | Ret Time (min) | Rel Ret Time | Sep. Code | Width 1/2 (sec) | Peak Area (counts) | Peak Height (counts) |
|-----------------|------------|----------------|--------------|-----------|-----------------|--------------------|----------------------|
| 1               | 0.3251     | 6.701          | 0.00         | BP        | 6.1             | 217487             | 34036                |
| 2               | 0.4309     | 7.000          | 0.00         | PV        | 6.2             | 288235             | 45163                |
| 3               | 0.7345     | 7.240          | 0.00         | VB        | 9.9             | 491302             | 42462                |
| 4               | 0.0399     | 9.248          | 0.00         | BV        | 6.2             | 26721              | 3893                 |
| 5               | 0.3642     | 9.579          | 0.00         | VP        | 5.6             | 243639             | 39903                |
| 6               | 0.3229     | 9.888          | 0.00         | PV        | 5.6             | 216000             | 35388                |
| 7               | 50.7085    | 10.317         | 0.00         | VV        | 6.1             | 33919400           | 5228876              |
| 8               | 46.6294    | 10.645         | 0.00         | VB        | 6.2             | 31190826           | 4644766              |
| 9               | 0.1758     | 11.915         | 0.00         | TF        | 0.0             | 117609             | 13524                |
| 10              | 0.0409     | 13.165         | 0.00         | TF        | 0.0             | 27355              | 2102                 |
| 11              | 0.1206     | 13.357         | 0.00         | TF        | 0.0             | 80662              | 12052                |
| 12              | 0.0527     | 14.205         | 0.00         | TF        | 0.0             | 35219              | 3718                 |
| 13              | 0.0546     | 18.525         | 0.00         | BB        | 7.0             | 36493              | 4830                 |
| <b>100.0000</b> |            |                |              |           |                 | <b>66890944</b>    | <b>10110713</b>      |

**Method Notes**XTerra MS C-18, 5um, 3.9x150 mm column Compound **5p**  
30-60% Acetonitrile with 0.1% TFA- Water with 0.1% TFA, 1 mL/min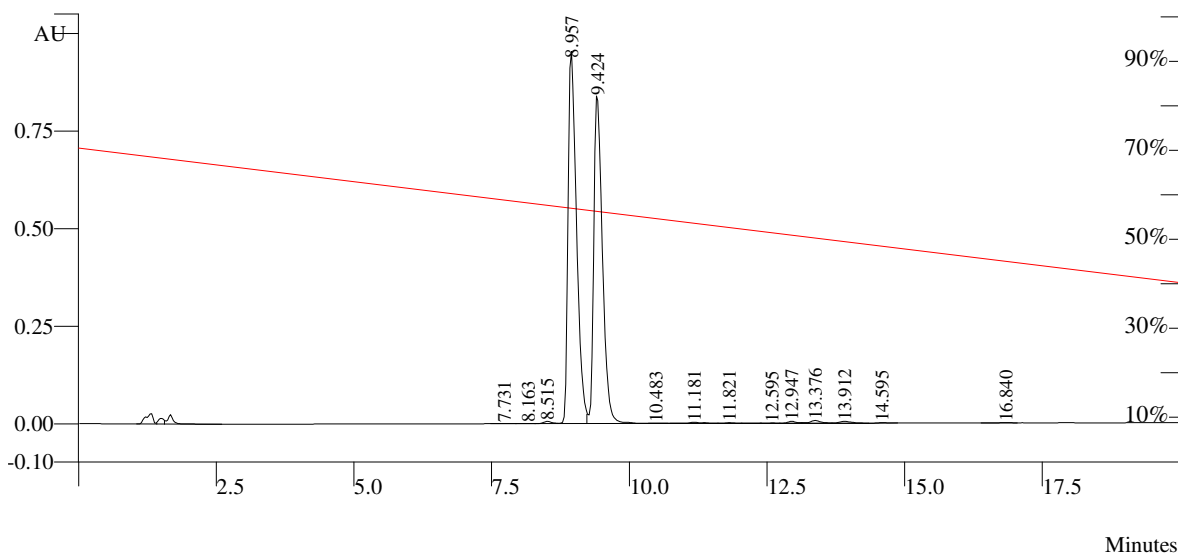

| Peak No         | Result (%) | Ret Time (min) | Rel Ret Time | Sep. Code | Width 1/2 (sec) | Peak Area (counts) | Peak Height (counts) |
|-----------------|------------|----------------|--------------|-----------|-----------------|--------------------|----------------------|
| 1               | 0.0296     | 7.731          | 0.00         | BV        | 12.0            | 30186              | 2532                 |
| 2               | 0.0352     | 8.163          | 0.00         | VV        | 13.1            | 35964              | 3076                 |
| 3               | 0.3168     | 8.515          | 0.00         | VV        | 10.7            | 323383             | 28299                |
| 4               | 51.4618    | 8.957          | 0.00         | VV        | 10.1            | 52537620           | 4887166              |
| 5               | 46.5940    | 9.424          | 0.00         | VP        | 9.9             | 47568104           | 4301179              |
| 6               | 0.0213     | 10.483         | 0.00         | TS        | 0.0             | 21796              | 2294                 |
| 7               | 0.2199     | 11.181         | 0.00         | TF        | 0.0             | 224545             | 14146                |
| 8               | 0.0689     | 11.821         | 0.00         | TF        | 0.0             | 70293              | 7722                 |
| 9               | 0.0505     | 12.595         | 0.00         | TF        | 0.0             | 51545              | 2507                 |
| 10              | 0.2583     | 12.947         | 0.00         | TF        | 0.0             | 263718             | 25849                |
| 11              | 0.4733     | 13.376         | 0.00         | TF        | 0.0             | 483228             | 36203                |
| 12              | 0.3663     | 13.912         | 0.00         | TF        | 0.0             | 373962             | 25940                |
| 13              | 0.0764     | 14.595         | 0.00         | PB        | 0.0             | 77965              | 7650                 |
| 14              | 0.0277     | 16.840         | 0.00         | BB        | 0.0             | 28291              | 1485                 |
| <b>100.0000</b> |            |                |              |           |                 | <b>102090600</b>   | <b>9346048</b>       |



**Method Notes**

XTerra MS C-18, 5um, 3.9x150 mm column Compound **5q**  
30-60% Acetonitrile with 0.1% TFA- Water with 0.1% TFA, 1 mL/min

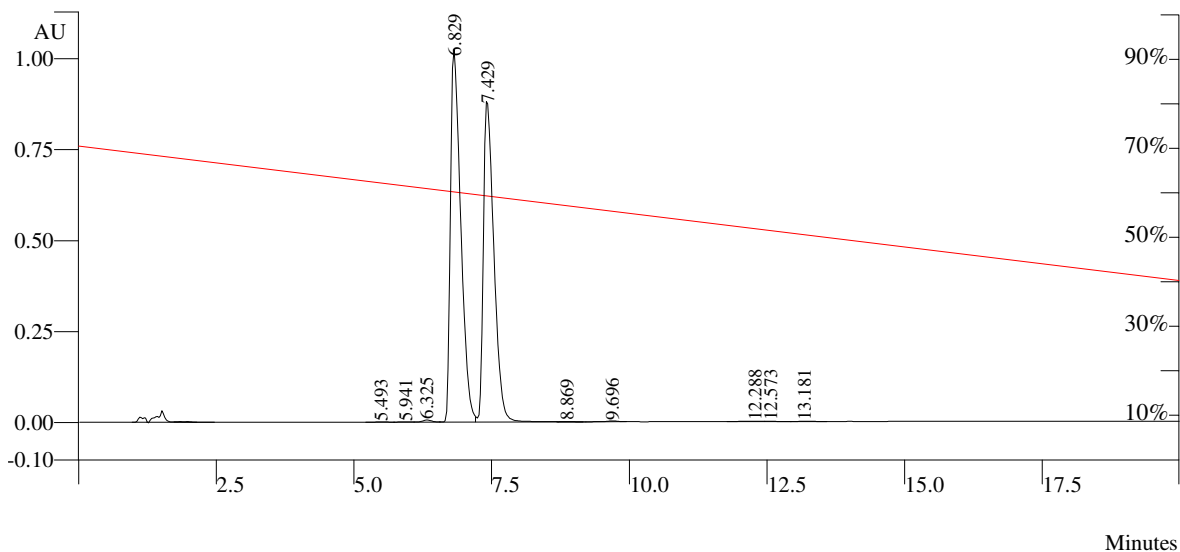

| Peak No         | Result (%) | Ret Time (min) | Rel Ret Time | Sep. Code | Width 1/2 (sec) | Peak Area (counts) | Peak Height (counts) |
|-----------------|------------|----------------|--------------|-----------|-----------------|--------------------|----------------------|
| 1               | 0.0305     | 5.493          | 0.00         | BV        | 11.5            | 39459              | 3291                 |
| 2               | 0.0284     | 5.941          | 0.00         | VV        | 13.3            | 36801              | 3326                 |
| 3               | 0.2453     | 6.325          | 0.00         | VV        | 10.1            | 317349             | 29444                |
| 4               | 52.6871    | 6.829          | 0.00         | VV        | 12.2            | 68157272           | 5246506              |
| 5               | 46.5998    | 7.429          | 0.00         | VP        | 12.5            | 60282552           | 4480238              |
| 6               | 0.0257     | 8.869          | 0.00         | TS        | 0.0             | 33258              | 3428                 |
| 7               | 0.1374     | 9.696          | 0.00         | PB        | 0.0             | 177749             | 12489                |
| 8               | 0.1278     | 12.288         | 0.00         | BV        | 37.8            | 165279             | 6665                 |
| 9               | 0.0569     | 12.573         | 0.00         | VV        | 40.5            | 73569              | 5038                 |
| 10              | 0.0611     | 13.181         | 0.00         | VB        | 22.2            | 79067              | 4343                 |
| <b>100.0000</b> |            |                |              |           |                 | <b>129362352</b>   | <b>9794768</b>       |

**Method Notes**

XTerra MS C-18, 5um, 3.9 mm x 150 mm Compound **5r**  
20-70% Acetonitrile with 0.1 % TFA - Water with 0.1% TFA, 1 mL/min

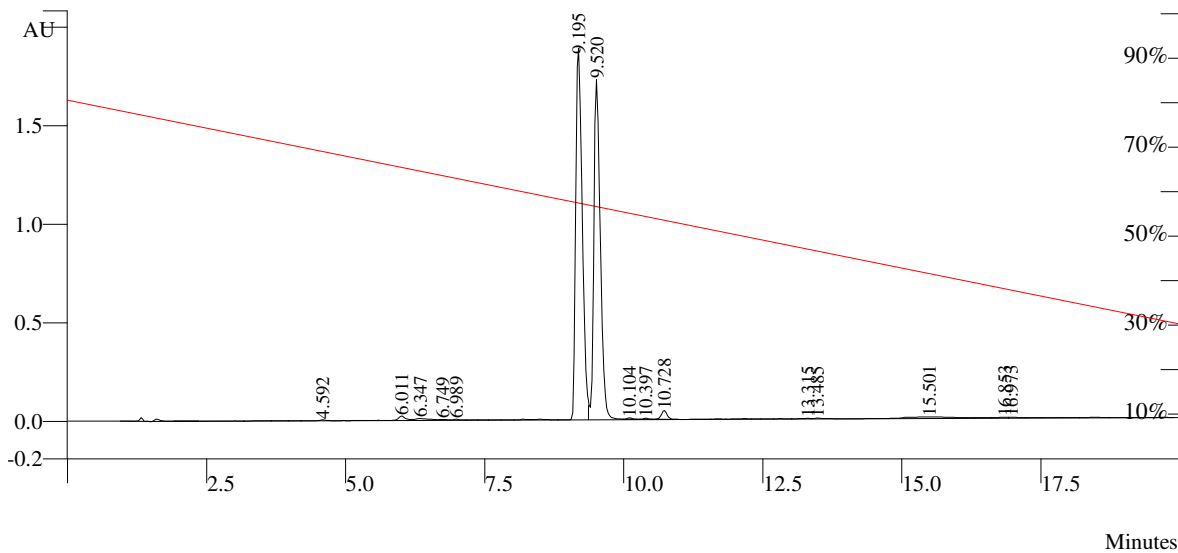

| Peak No | Result (%)     | Ret Time (min) | Rel Ret Time | Sep. Code | Width 1/2 (sec) | Peak Area (counts) | Peak Height (counts) |
|---------|----------------|----------------|--------------|-----------|-----------------|--------------------|----------------------|
| 1       | 0.1323         | 4.592          | 0.00         | VP        | 9.9             | 210314             | 25851                |
| 2       | 0.6452         | 6.011          | 0.00         | VV        | 8.8             | 1025447            | 111683               |
| 3       | 0.5786         | 6.347          | 0.00         | VV        | 0.0             | 919580             | 47139                |
| 4       | 0.1220         | 6.749          | 0.00         | VV        | 0.0             | 193913             | 18267                |
| 5       | 0.1621         | 6.989          | 0.00         | VV        | 0.0             | 257565             | 23873                |
| 6       | 49.4987        | 9.195          | 0.00         | VV        | 7.8             | 78668664           | 9656671              |
| 7       | 45.3956        | 9.520          | 0.00         | VP        | 7.5             | 72147648           | 8836462              |
| 8       | 0.1209         | 10.104         | 0.00         | TS        | 0.0             | 192197             | 34953                |
| 9       | 0.0877         | 10.397         | 0.00         | TS        | 0.0             | 139310             | 24646                |
| 10      | 1.0419         | 10.728         | 0.00         | TS        | 0.0             | 1655955            | 227150               |
| 11      | 0.1000         | 13.315         | 0.00         | VV        | 0.0             | 158948             | 14917                |
| 12      | 0.1684         | 13.485         | 0.00         | VP        | 0.0             | 267651             | 20941                |
| 13      | 1.5293         | 15.501         | 0.00         | PV        | 0.0             | 2430553            | 40424                |
| 14      | 0.2267         | 16.853         | 0.00         | VV        | 0.0             | 360336             | 25305                |
| 15      | 0.1905         | 16.973         | 0.00         | VV        | 0.0             | 302813             | 23515                |
|         | <b>99.9999</b> |                |              |           |                 | <b>158930896</b>   | <b>19131796</b>      |

**Method Notes**XTerra MS C-18, 5um, 3.9 mm x 150 mm Compound **5s**  
20-70% Acetonitrile with 0.1 % TFA - Water with 0.1% TFA, 1 mL/min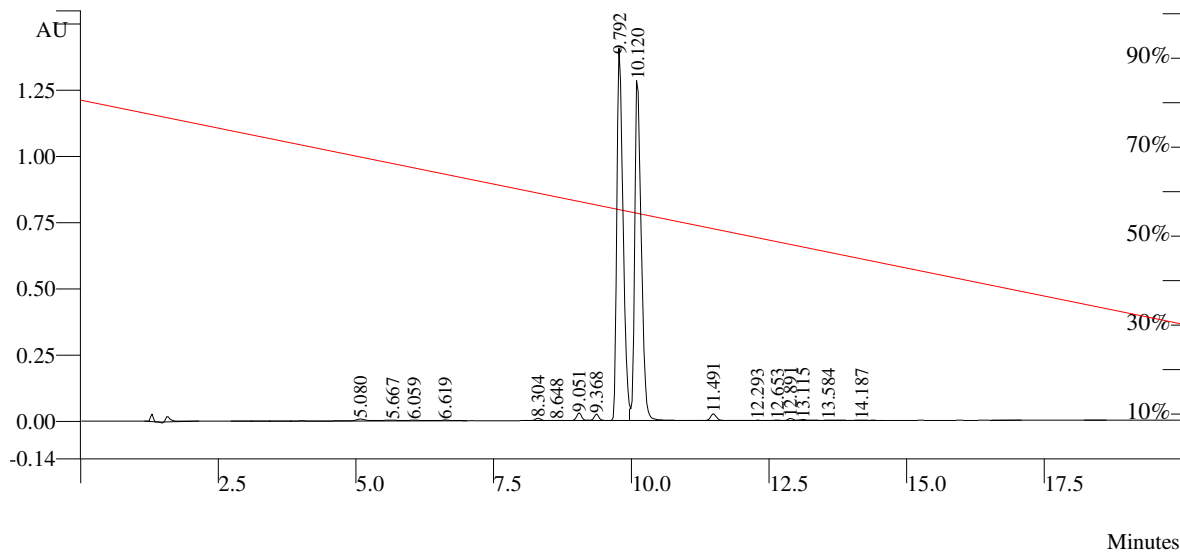

| Peak No | Result (%)     | Ret Time (min) | Rel Ret Time | Sep. Code | Width 1/2 (sec) | Peak Area (counts) | Peak Height (counts) |
|---------|----------------|----------------|--------------|-----------|-----------------|--------------------|----------------------|
| 1       | 0.3844         | 5.080          | 0.00         | PV        | 11.2            | 448881             | 36754                |
| 2       | 0.2792         | 5.667          | 0.00         | VV        | 10.9            | 326003             | 12096                |
| 3       | 0.2316         | 6.059          | 0.00         | VV        | 0.0             | 270415             | 10155                |
| 4       | 0.1296         | 6.619          | 0.00         | VB        | 15.4            | 151344             | 16749                |
| 5       | 0.2876         | 8.304          | 0.00         | BP        | 6.2             | 335917             | 47543                |
| 6       | 0.0130         | 8.648          | 0.00         | TS        | 0.0             | 15217              | 2694                 |
| 7       | 0.8307         | 9.051          | 0.00         | PV        | 5.8             | 970112             | 151718               |
| 8       | 0.6951         | 9.368          | 0.00         | VV        | 5.8             | 811794             | 123657               |
| 9       | 48.8645        | 9.792          | 0.00         | VV        | 7.5             | 57064840           | 7198850              |
| 10      | 46.9362        | 10.120         | 0.00         | VB        | 7.7             | 54812976           | 6568893              |
| 11      | 0.8070         | 11.491         | 0.00         | TF        | 0.0             | 942483             | 128863               |
| 12      | 0.0114         | 12.293         | 0.00         | TF        | 0.0             | 13344              | 2529                 |
| 13      | 0.0242         | 12.653         | 0.00         | TF        | 0.0             | 28310              | 4414                 |
| 14      | 0.2211         | 12.891         | 0.00         | TF        | 0.0             | 258221             | 38212                |
| 15      | 0.1372         | 13.115         | 0.00         | TF        | 0.0             | 160265             | 17434                |
| 16      | 0.0732         | 13.584         | 0.00         | TF        | 0.0             | 85459              | 5013                 |
| 17      | 0.0738         | 14.187         | 0.00         | TF        | 0.0             | 86182              | 7322                 |
|         | <b>99.9998</b> |                |              |           |                 | <b>116781768</b>   | <b>14372896</b>      |

**Method Notes**

XTerra MS C-18, 5um, 3.9x150 mm column Compound **5t**  
30-60% Acetonitrile with 0.1% TFA- Water with 0.1% TFA, 1 mL/min

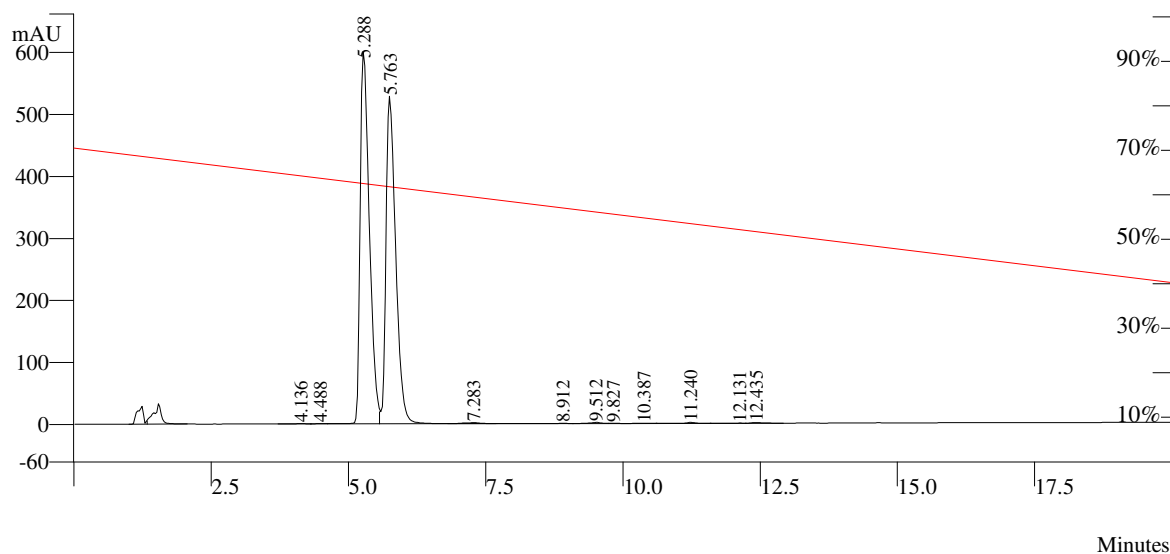

| Peak No | Result (%)     | Ret Time (min) | Rel Ret Time | Sep. Code | Width 1/2 (sec) | Peak Area (counts) | Peak Height (counts) |
|---------|----------------|----------------|--------------|-----------|-----------------|--------------------|----------------------|
| 1       | 0.0585         | 4.136          | 0.00         | BV        | 13.1            | 40806              | 2914                 |
| 2       | 0.0493         | 4.488          | 0.00         | VV        | 13.8            | 34370              | 2711                 |
| 3       | 51.0487        | 5.288          | 0.00         | VV        | 10.9            | 35620840           | 3076206              |
| 4       | 47.9881        | 5.763          | 0.00         | VP        | 11.4            | 33485210           | 2706122              |
| 5       | 0.2469         | 7.283          | 0.00         | TS        | 0.0             | 172315             | 9025                 |
| 6       | 0.0548         | 8.912          | 0.00         | PV        | 0.0             | 38242              | 2497                 |
| 7       | 0.2011         | 9.512          | 0.00         | VV        | 0.0             | 140343             | 9221                 |
| 8       | 0.0290         | 9.827          | 0.00         | VP        | 0.0             | 20269              | 2074                 |
| 9       | 0.0414         | 10.387         | 0.00         | PV        | 0.0             | 28880              | 2072                 |
| 10      | 0.1378         | 11.240         | 0.00         | VV        | 0.0             | 96163              | 8028                 |
| 11      | 0.0236         | 12.131         | 0.00         | VV        | 0.0             | 16436              | 1459                 |
| 12      | 0.1207         | 12.435         | 0.00         | VB        | 0.0             | 84228              | 6069                 |
|         | <b>99.9999</b> |                |              |           |                 | <b>69778096</b>    | <b>5828398</b>       |

**Method Notes**

XTerra MS C-18, 5um, 3.9 mm x 150 mm Compound **5u**  
20-70% Acetonitrile with 0.1 % TFA - Water with 0.1% TFA, 1 mL/min

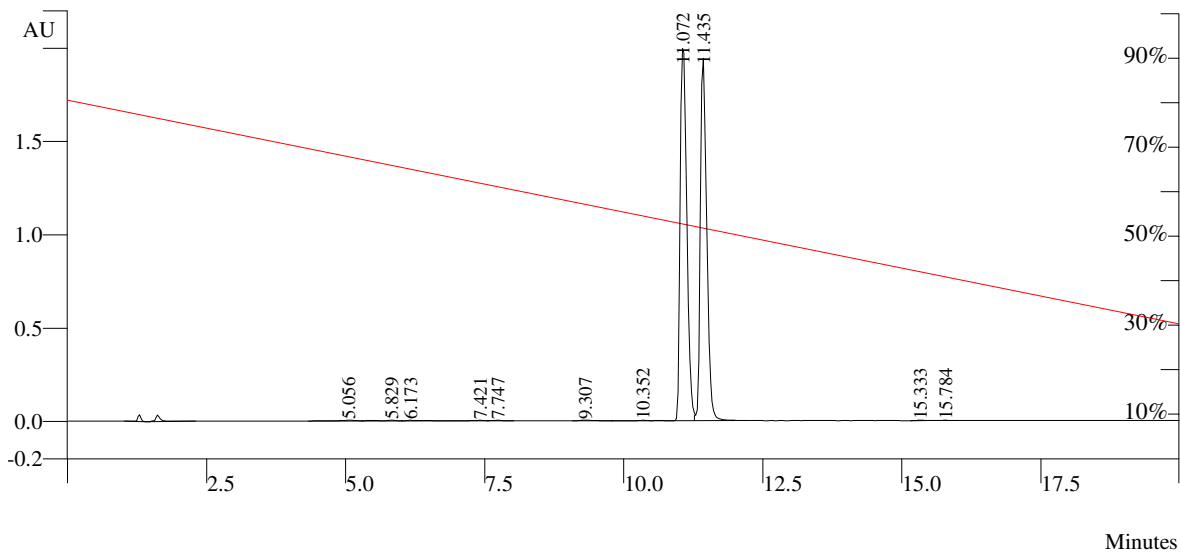

| Peak No | Result (%) | Ret Time (min) | Rel Ret Time | Sep. Code | Width 1/2 (sec) | Peak Area (counts) | Peak Height (counts) |
|---------|------------|----------------|--------------|-----------|-----------------|--------------------|----------------------|
| 1       | 0.2433     | 5.056          | 0.00         | BV        | 18.4            | 405919             | 19316                |
| 2       | 0.2334     | 5.829          | 0.00         | VV        | 8.5             | 389363             | 20770                |
| 3       | 0.1142     | 6.173          | 0.00         | VV        | 9.3             | 190571             | 16976                |
| 4       | 0.2328     | 7.421          | 0.00         | VV        | 8.8             | 388357             | 17553                |
| 5       | 0.0928     | 7.747          | 0.00         | VB        | 0.0             | 154784             | 14305                |
| 6       | 0.1523     | 9.307          | 0.00         | BV        | 13.0            | 254004             | 17156                |
| 7       | 0.0690     | 10.352         | 0.00         | VP        | 7.5             | 115111             | 13433                |
| 8       | 50.9453    | 11.072         | 0.00         | PV        | 7.7             | 84992776           | 10223341             |
| 9       | 47.7896    | 11.435         | 0.00         | VB        | 7.4             | 79728216           | 9949035              |
| 10      | 0.0666     | 15.333         | 0.00         | BP        | 6.6             | 111105             | 16071                |
| 11      | 0.0607     | 15.784         | 0.00         | PB        | 6.9             | 101348             | 13451                |
|         |            |                |              |           |                 | <b>166831552</b>   | <b>20321408</b>      |

**Method Notes**XTerra MS C-18, 5um, 3.9 mm x 150 mm Compound **5v**  
10-60% Acetonitrile with 0.1 % TFA - Water with 0.1% TFA, 1 mL/min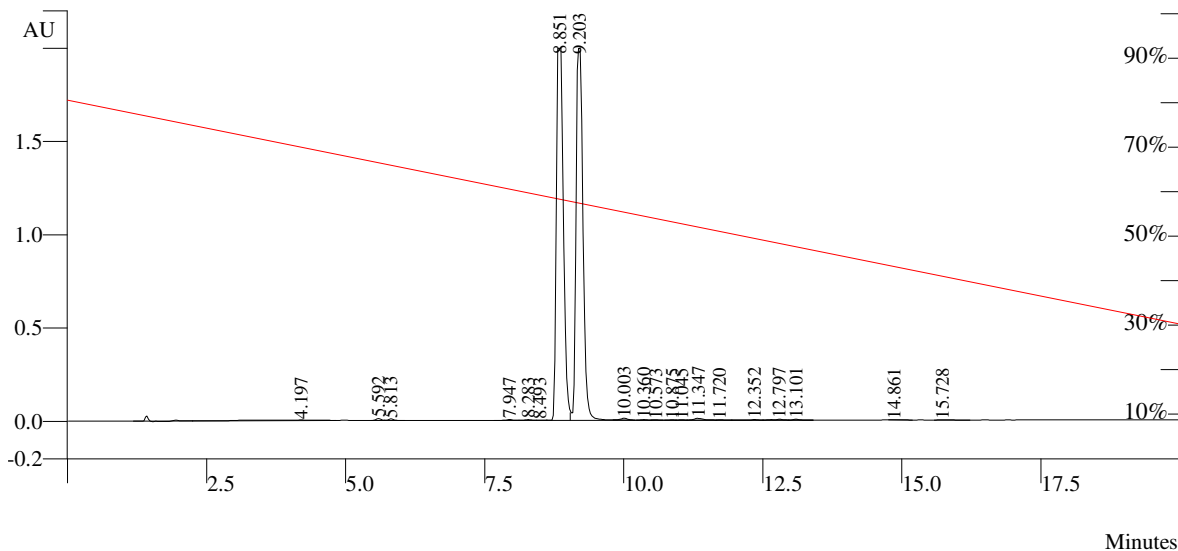

| Peak No         | Result (%) | Ret Time (min) | Rel Ret Time | Sep. Code | Width 1/2 (sec) | Peak Area (counts) | Peak Height (counts) |
|-----------------|------------|----------------|--------------|-----------|-----------------|--------------------|----------------------|
| 1               | 0.7772     | 4.197          | 0.00         | VB        | 0.0             | 1418264            | 16226                |
| 2               | 0.1756     | 5.592          | 0.00         | BV        | 5.4             | 320363             | 54607                |
| 3               | 0.1591     | 5.813          | 0.00         | VB        | 5.9             | 290421             | 43650                |
| 4               | 0.0963     | 7.947          | 0.00         | BV        | 6.6             | 175676             | 24095                |
| 5               | 0.0815     | 8.283          | 0.00         | VV        | 6.1             | 148655             | 21395                |
| 6               | 0.0213     | 8.493          | 0.00         | VV        | 6.4             | 38942              | 5014                 |
| 7               | 49.0247    | 8.851          | 0.00         | VV        | 8.3             | 89462896           | 10216704             |
| 8               | 48.6606    | 9.203          | 0.00         | VB        | 7.8             | 88798496           | 10216251             |
| 9               | 0.1938     | 10.003         | 0.00         | TS        | 0.0             | 353566             | 46678                |
| 10              | 0.0435     | 10.360         | 0.00         | TF        | 0.0             | 79386              | 12928                |
| 11              | 0.0223     | 10.573         | 0.00         | TF        | 0.0             | 40706              | 5397                 |
| 12              | 0.0189     | 10.875         | 0.00         | TF        | 0.0             | 34534              | 5677                 |
| 13              | 0.0312     | 11.045         | 0.00         | TF        | 0.0             | 56855              | 8133                 |
| 14              | 0.3242     | 11.347         | 0.00         | TF        | 0.0             | 591614             | 52273                |
| 15              | 0.0257     | 11.720         | 0.00         | TF        | 0.0             | 46977              | 7316                 |
| 16              | 0.0529     | 12.352         | 0.00         | TF        | 0.0             | 96546              | 12379                |
| 17              | 0.1478     | 12.797         | 0.00         | TF        | 0.0             | 269640             | 27793                |
| 18              | 0.1046     | 13.101         | 0.00         | TF        | 0.0             | 190898             | 28150                |
| 19              | 0.0159     | 14.861         | 0.00         | BB        | 5.4             | 28978              | 4368                 |
| 20              | 0.0231     | 15.728         | 0.00         | BB        | 7.5             | 42078              | 3845                 |
| <b>100.0002</b> |            |                |              |           |                 | <b>182485472</b>   | <b>20812876</b>      |

**Method Notes**

XTerra MS C-18, 5um, 3.9 mm x 150 mm Compound **5w**  
 10-60% Acetonitrile with 0.1 % TFA - Water with 0.1% TFA, 1 mL/min

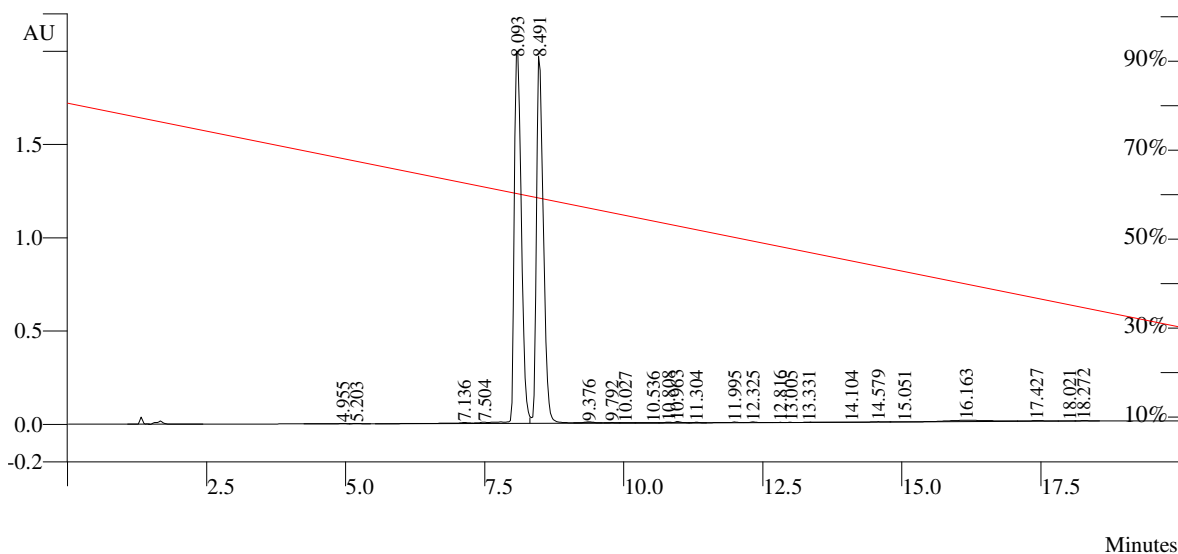

| Peak No | Result (%)      | Ret Time (min) | Rel Ret Time | Sep. Code | Width 1/2 (sec) | Peak Area (counts) | Peak Height (counts) |
|---------|-----------------|----------------|--------------|-----------|-----------------|--------------------|----------------------|
| 1       | 0.0359          | 4.955          | 0.00         | BV        | 8.0             | 65900              | 8396                 |
| 2       | 0.0458          | 5.203          | 0.00         | VB        | 9.0             | 84041              | 10271                |
| 3       | 0.2724          | 7.136          | 0.00         | BV        | 16.3            | 499712             | 23935                |
| 4       | 0.1978          | 7.504          | 0.00         | VV        | 21.8            | 362872             | 30908                |
| 5       | 49.2890         | 8.093          | 0.00         | VV        | 8.3             | 90422992           | 10216282             |
| 6       | 47.8527         | 8.491          | 0.00         | VP        | 8.0             | 87788064           | 10079022             |
| 7       | 0.1764          | 9.376          | 0.00         | TS        | 0.0             | 323562             | 29612                |
| 8       | 0.0397          | 9.792          | 0.00         | TF        | 0.0             | 72823              | 10801                |
| 9       | 0.0207          | 10.027         | 0.00         | TF        | 0.0             | 38039              | 4848                 |
| 10      | 0.0345          | 10.536         | 0.00         | TF        | 0.0             | 63253              | 4218                 |
| 11      | 0.0767          | 10.808         | 0.00         | TF        | 0.0             | 140737             | 21401                |
| 12      | 0.1408          | 10.963         | 0.00         | TF        | 0.0             | 258273             | 31697                |
| 13      | 0.0491          | 11.304         | 0.00         | TF        | 0.0             | 90081              | 14963                |
| 14      | 0.0633          | 11.995         | 0.00         | PV        | 0.0             | 116069             | 17665                |
| 15      | 0.0824          | 12.325         | 0.00         | VV        | 0.0             | 151132             | 15555                |
| 16      | 0.0103          | 12.816         | 0.00         | VV        | 0.0             | 18830              | 2756                 |
| 17      | 0.0076          | 13.005         | 0.00         | VP        | 0.0             | 13894              | 1851                 |
| 18      | 0.0035          | 13.331         | 0.00         | PV        | 0.0             | 6360               | 699                  |
| 19      | 0.0190          | 14.104         | 0.00         | VP        | 0.0             | 34791              | 2492                 |
| 20      | 0.0553          | 14.579         | 0.00         | PV        | 0.0             | 101531             | 8989                 |
| 21      | 0.0177          | 15.051         | 0.00         | VP        | 0.0             | 32436              | 2782                 |
| 22      | 1.1588          | 16.163         | 0.00         | PV        | 0.0             | 2125895            | 37753                |
| 23      | 0.2476          | 17.427         | 0.00         | VV        | 0.0             | 454160             | 19852                |
| 24      | 0.0499          | 18.021         | 0.00         | VV        | 0.0             | 91623              | 7310                 |
| 25      | 0.0532          | 18.272         | 0.00         | VB        | 0.0             | 97624              | 6079                 |
|         | <b>100.0001</b> |                |              |           |                 | <b>183454656</b>   | <b>20610140</b>      |

**Method Notes**

XTerra MS C-18, 5um, 3.9 mm x 150 mm Compound 5x  
20-70% Acetonitrile with 0.1 % TFA - Water with 0.1% TFA, 1 mL/min

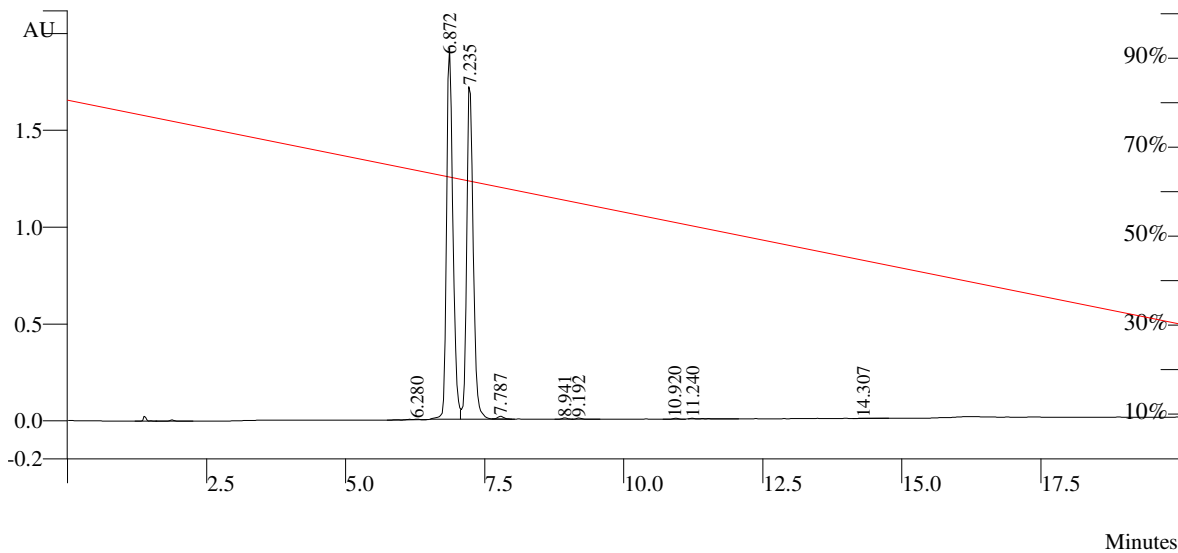

| Peak No | Result (%)     | Ret Time (min) | Rel Ret Time | Sep. Code | Width 1/2 (sec) | Peak Area (counts) | Peak Height (counts) |
|---------|----------------|----------------|--------------|-----------|-----------------|--------------------|----------------------|
| 1       | 0.0660         | 6.280          | 0.00         | BB        | 16.5            | 99739              | 11309                |
| 2       | 51.3499        | 6.872          | 0.00         | BV        | 7.4             | 77551536           | 9813007              |
| 3       | 47.6334        | 7.235          | 0.00         | VB        | 7.4             | 71938752           | 8792520              |
| 4       | 0.3805         | 7.787          | 0.00         | TS        | 0.0             | 574682             | 74913                |
| 5       | 0.1642         | 8.941          | 0.00         | BV        | 6.4             | 248007             | 35235                |
| 6       | 0.1743         | 9.192          | 0.00         | VB        | 5.9             | 263239             | 36423                |
| 7       | 0.0935         | 10.920         | 0.00         | BB        | 5.6             | 141234             | 25696                |
| 8       | 0.0986         | 11.240         | 0.00         | BB        | 4.9             | 148970             | 21391                |
| 9       | 0.0395         | 14.307         | 0.00         | BB        | 9.7             | 59618              | 5716                 |
|         | <b>99.9999</b> |                |              |           |                 | <b>151025760</b>   | <b>18816212</b>      |



**Method Notes**

XTerra MS C-18, 5um, 3.9 mm x 150 mm    Compound **5y**  
20-70% Acetonitrile with 0.1 % TFA - Water with 0.1% TFA, 1 mL/min

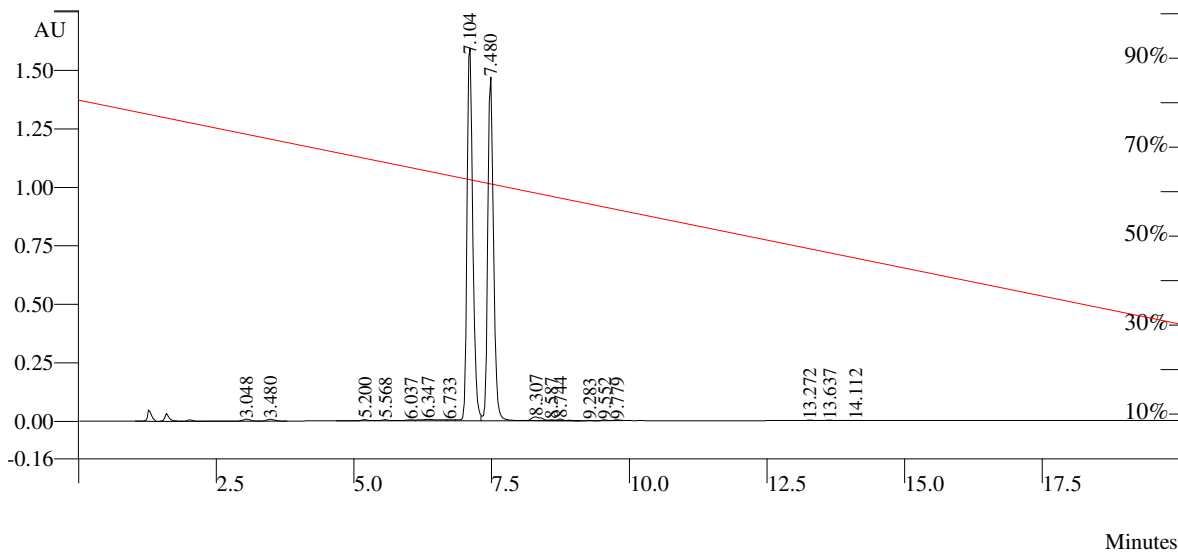

| Peak No         | Result (%) | Ret Time (min) | Rel Ret Time | Sep. Code | Width 1/2 (sec) | Peak Area (counts) | Peak Height (counts) |
|-----------------|------------|----------------|--------------|-----------|-----------------|--------------------|----------------------|
| 1               | 0.3863     | 3.048          | 0.00         | VV        | 9.4             | 460477             | 42021                |
| 2               | 0.3162     | 3.480          | 0.00         | VB        | 9.6             | 376845             | 38129                |
| 3               | 0.2117     | 5.200          | 0.00         | BV        | 7.0             | 252309             | 25665                |
| 4               | 0.2110     | 5.568          | 0.00         | VV        | 7.5             | 251483             | 25183                |
| 5               | 0.2365     | 6.037          | 0.00         | VV        | 14.7            | 281836             | 21141                |
| 6               | 0.6660     | 6.347          | 0.00         | VV        | 0.0             | 793763             | 31889                |
| 7               | 0.1511     | 6.733          | 0.00         | VV        | 0.0             | 180157             | 20599                |
| 8               | 50.3695    | 7.104          | 0.00         | VV        | 6.7             | 60036604           | 8156786              |
| 9               | 45.8353    | 7.480          | 0.00         | VP        | 6.6             | 54632200           | 7522079              |
| 10              | 0.8693     | 8.307          | 0.00         | TF        | 0.0             | 1036115            | 83835                |
| 11              | 0.0664     | 8.587          | 0.00         | TF        | 0.0             | 79184              | 19640                |
| 12              | 0.2947     | 8.744          | 0.00         | TF        | 0.0             | 351268             | 37908                |
| 13              | 0.0391     | 9.283          | 0.00         | PP        | 0.0             | 46577              | 7784                 |
| 14              | 0.0916     | 9.552          | 0.00         | PV        | 0.0             | 109193             | 16495                |
| 15              | 0.1108     | 9.779          | 0.00         | VB        | 0.0             | 132057             | 15179                |
| 16              | 0.0633     | 13.272         | 0.00         | BP        | 6.7             | 75478              | 10577                |
| 17              | 0.0723     | 13.637         | 0.00         | PP        | 6.4             | 86190              | 11492                |
| 18              | 0.0090     | 14.112         | 0.00         | PB        | 0.0             | 10732              | 1556                 |
| <b>100.0001</b> |            |                |              |           |                 | <b>119192464</b>   | <b>16087958</b>      |

**Method Notes**

XTerra MS C-18, 5um, 3.9 mm x 150 mm Compound **5z**  
20-70% Acetonitrile with 0.1 % TFA - Water with 0.1% TFA, 1 mL/min

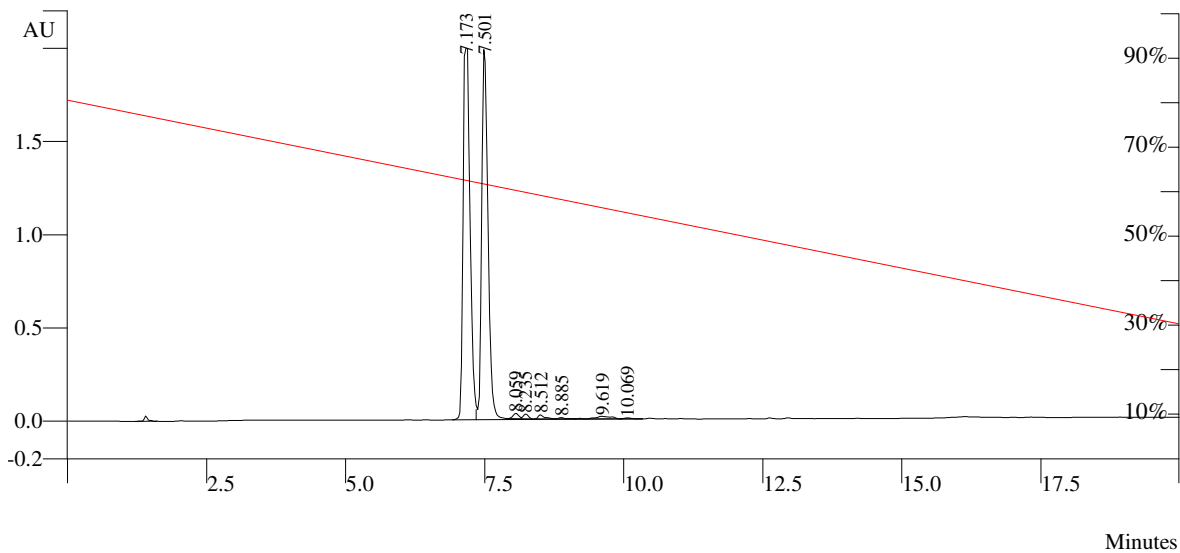

| Peak No         | Result (%) | Ret Time (min) | Rel Ret Time | Sep. Code | Width 1/2 (sec) | Peak Area (counts) | Peak Height (counts) |
|-----------------|------------|----------------|--------------|-----------|-----------------|--------------------|----------------------|
| 1               | 50.6831    | 7.173          | 0.00         | BV        | 8.0             | 88635136           | 10207425             |
| 2               | 46.5527    | 7.501          | 0.00         | VB        | 7.2             | 81411888           | 10165637             |
| 3               | 0.5949     | 8.059          | 0.00         | TF        | 0.0             | 1040417            | 145957               |
| 4               | 0.4563     | 8.235          | 0.00         | TF        | 0.0             | 797978             | 130091               |
| 5               | 0.5172     | 8.512          | 0.00         | TF        | 0.0             | 904444             | 114564               |
| 6               | 0.1913     | 8.885          | 0.00         | TF        | 0.0             | 334508             | 35552                |
| 7               | 0.8554     | 9.619          | 0.00         | TF        | 0.0             | 1496013            | 69892                |
| 8               | 0.1491     | 10.069         | 0.00         | TF        | 0.0             | 260768             | 30853                |
| <b>100.0000</b> |            |                |              |           |                 | <b>174881168</b>   | <b>20899972</b>      |

**Method Notes**

XTerra MS C-18, 5um, 3.9 mm x 150 mm Compound **5aa**  
20-70% Acetonitrile with 0.1 % TFA - Water with 0.1% TFA, 1 mL/min

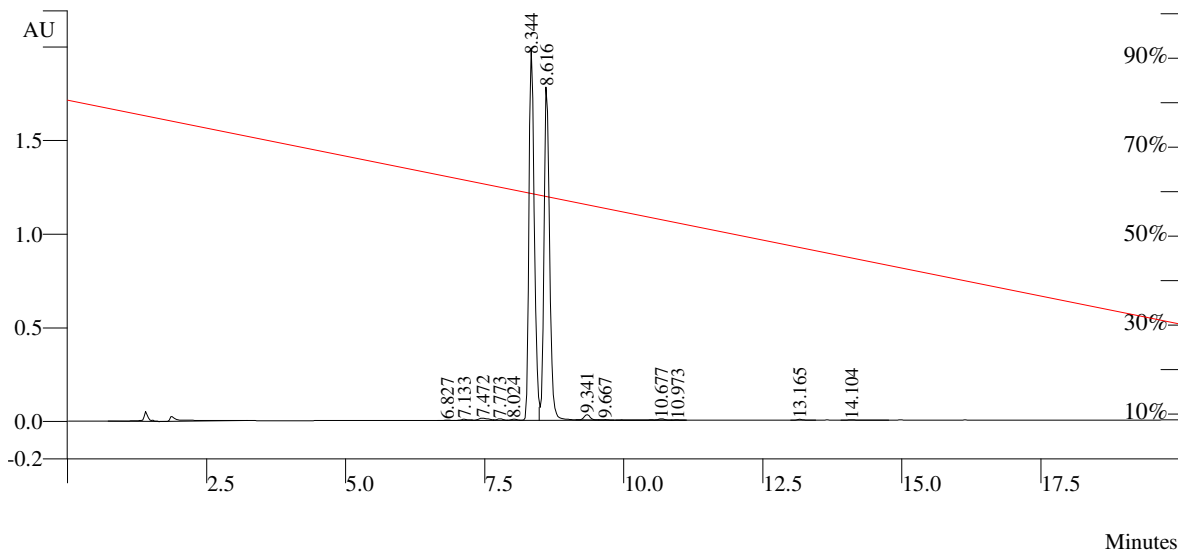

| Peak No        | Result (%) | Ret Time (min) | Rel Ret Time | Sep. Code | Width 1/2 (sec) | Peak Area (counts) | Peak Height (counts) |
|----------------|------------|----------------|--------------|-----------|-----------------|--------------------|----------------------|
| 1              | 0.0459     | 6.827          | 0.00         | BV        | 6.6             | 62262              | 8638                 |
| 2              | 0.2063     | 7.133          | 0.00         | VV        | 7.2             | 279782             | 31393                |
| 3              | 0.5972     | 7.472          | 0.00         | VV        | 12.8            | 809796             | 61982                |
| 4              | 0.2729     | 7.773          | 0.00         | VV        | 7.5             | 370087             | 45488                |
| 5              | 0.1903     | 8.024          | 0.00         | VV        | 7.5             | 258068             | 33077                |
| 6              | 49.8517    | 8.344          | 0.00         | VV        | 6.2             | 67593352           | 10180037             |
| 7              | 47.3622    | 8.616          | 0.00         | VB        | 6.4             | 64217788           | 9117663              |
| 8              | 0.8332     | 9.341          | 0.00         | TF        | 0.0             | 1129712            | 144906               |
| 9              | 0.0764     | 9.667          | 0.00         | TF        | 0.0             | 103614             | 13090                |
| 10             | 0.3140     | 10.677         | 0.00         | TF        | 0.0             | 425792             | 37889                |
| 11             | 0.0466     | 10.973         | 0.00         | TF        | 0.0             | 63128              | 8557                 |
| 12             | 0.1269     | 13.165         | 0.00         | BB        | 6.4             | 172018             | 23544                |
| 13             | 0.0762     | 14.104         | 0.00         | BB        | 7.7             | 103320             | 10769                |
| <b>99.9998</b> |            |                |              |           |                 | <b>135588704</b>   | <b>19717032</b>      |

**Table 1.** QSAR models A and B description. Models A and B buildup to final model C presented in the body of the manuscript.

(a) Model A:  $\ln EC_{50} \sim L + TotalHyd + V\_S + PSA$

| Descriptor | Estimate coefficients | Std. error | t-value | Pr (> t ) |
|------------|-----------------------|------------|---------|-----------|
| Intercept  | 11.27560              | 1.57864    | 7.143   | 6.04e-08  |
| L          | -1.01510              | 0.24946    | -4.069  | 0.000316  |
| TotalHyd   | 1.02512               | 0.48184    | 2.128   | 0.041710  |
| V_S        | 0.03624               | 0.01132    | 3.202   | 0.003221  |
| PSA        | 0.12540               | 0.03047    | 4.115   | 0.000278  |

Residual standard error = 0.9213 on 30 degrees of freedom, multiple  $R^2 = 0.5186$ , adjusted  $R^2 = 0.4544$ , F-statistic = 8.08 on 4 and 30 degrees of freedom, p-value = 0.0001516.

(b) Model B:  $\ln EC_{50} \sim L + TotalHyd + V\_S + PSA + \log P$

| Descriptor | Estimate coefficients | Std. error | t-value | Pr (> t ) |
|------------|-----------------------|------------|---------|-----------|
| Intercept  | 10.83080              | 1.48314    | 7.303   | 4.82e-08  |
| L          | -0.88445              | 0.23898    | -3.701  | 0.000895  |
| TotalHyd   | 1.56983               | 0.50506    | 3.108   | 0.004191  |
| V_S        | 0.03727               | 0.01055    | 3.531   | 0.001406  |
| PSA        | 0.13352               | 0.02860    | 4.668   | 6.38e-05  |
| logP       | -0.96054              | 0.40781    | -2.355  | 0.025481  |

Residual standard error = 0.8585 on 29 degrees of freedom, multiple  $R^2 = 0.5959$ , adjusted  $R^2 = 0.5262$ , F-statistic = 8.554 on 5 and 29 degrees of freedom, p-value = 4.538e-05.

**Table 2.** ANOVA evaluations testing the relative statistical merit of model B relative to model A and model C relative to model B.

(a) Models A and B comparison

| Model | Res. Df | RSS    | Df | Sum of Sq | F      | Pr (>F) |
|-------|---------|--------|----|-----------|--------|---------|
| A     | 30      | 25.462 |    |           |        |         |
| B     | 29      | 21.373 | 1  | 4.0888    | 5.5478 | 0.02548 |

Res. Df = degrees of freedom in residuals (number of points minus constraints). RSS = sums of squares of deviations for all points. Df = degrees of freedom. F = F-statistic. Pr (>F) = p-value.

(b) Models B and C comparison

| Model | Res. Df | RSS    | Df | Sum of Sq | F      | Pr (>F) |
|-------|---------|--------|----|-----------|--------|---------|
| B     | 29      | 21.373 |    |           |        |         |
| C     | 28      | 16.942 | 1  | 4.4311    | 7.3231 | 0.01146 |

Res. Df = degrees of freedom in residuals = (number of points minus constraints). RSS = sums of squares of deviations for all points. Df = degrees of freedom. F = F-statistic. Pr (>F) = p-value.

**Figure 1.** Sequence identities of selected GPCR templates to GPR88. The PDB code of selected GPCRs is indicated. Note: ‘without’ is an indication that the chimera proteins were removed in instances of structures crystallized in a chimeric form.

| IDENTITY RESULTS |                 |                 |        |                 |                 |                 |                 |                 |                 |      |
|------------------|-----------------|-----------------|--------|-----------------|-----------------|-----------------|-----------------|-----------------|-----------------|------|
| 2R4Rwithout.pdb  | 100%            |                 |        |                 |                 |                 |                 |                 |                 |      |
| 3SN6without.pdb  | 94.44%          | 100%            |        |                 |                 |                 |                 |                 |                 |      |
| 5A8E             | 63.42%          | 62.32%          | 100%   |                 |                 |                 |                 |                 |                 |      |
| 3PBLwithout.pdb  | 30.52%          | 34.21%          | 33.15% | 100%            |                 |                 |                 |                 |                 |      |
| 3MBLwithout.pdb  | 36.57%          | 29.57%          | 30.87% | 23.15%          | 100%            |                 |                 |                 |                 |      |
| 4DJHwithout.pdb  | 25.92%          | 22.53%          | 20.35% | 20%             | 20.2%           | 100%            |                 |                 |                 |      |
| 4EA3without.pdb  | 24.53%          | 22.3%           | 21.58% | 22.1%           | 20.14%          | 60.43%          | 100%            |                 |                 |      |
| 3OE6without.pdb  | 17.18%          | 20.83%          | 21.87% | 19.47%          | 18.75%          | 28.12%          | 30.72%          | 100%            |                 |      |
| 3RZEwithout.pdb  | 26.2%           | 29.94%          | 29.94% | 26.73%          | 28.87%          | 25.13%          | 21.39%          |                 | 100%            |      |
| GR88             | 18.98%          | 16.9%           | 20.35% | 18.94%          | 18.4%           | 14.98%          | 17.98%          | 15.1%           | 20.32%          | 100% |
|                  | 2R4Rwithout.pdb | 3SN6without.pdb | 5A8E   | 3PBLwithout.pdb | 3MBLwithout.pdb | 4DJHwithout.pdb | 4EA3without.pdb | 3OE6without.pdb | 3RZEwithout.pdb | GR88 |

### Multiple Sequence Alignment employed to build GPR88 model

CLUSTAL 2.1 multiple sequence alignment

```

2R4R      -----GIVMSLIVLAIIVFGNVLVITAI--FE 25
3SN6      -----EVVVVGMGIVMSLIVLAIIVFGNVLVITAIKFE 33
5A8E      -----LSQQWEAGMSLLMALVLLIVAGNVLVIAAIGSTQ 35
3PBL      -----YALSYCALILAIVFGNGLVCMAVLKER 27
3MBL      -----IMGSSVYITVELAIAVLAAILGNVLCVAVWLNS 33
4DJH      -----SPAIPVLIITAVYSVVFVGLVGNLSVMFVIIRYT 34
4EA3      -----PLGLKVTIVGLYLAVCVGGLLGNCLVMYVILRHT 34
3OE6      -----NFNKIFLPTIYSIIFLTGIVGNGLVILVMGYQK 33
3RZE      -----MPLVVVLSTICLVTVGLNLLVLYAVRSER 29
GPR88     MTNSSSTSTSSTTGGSLLLLCEEEESWAGRRIIPVSLLYSGLAIGGTLANGMVLYLVSSFR 60
          : : * : * :

2R4R      RLQTVTNYFITSLACADLVMLGLAVVPPFG-----FWTSID 59
3SN6      RLQTVTNYFITSLACADLVMLGLAVVPPFGAAHLLTK-----TWTFGNFWECEFWTSID 84
5A8E      RLQTLTNLFITSLACADLVVGLLVVPPFGATLVVRG-----TWLWGSFLCELWTSID 86
3PBL      ALQTTTNYLVVSLAVADLLVATLVMPVWVYLEVTGG-----VWNFSRICCDVFTLD 79
3MBL      NLQVNTNYFVVSLLAAADIAVGLAIPFAITISTG-----FCAACHGCLFIACFV 82
4DJH      KMKATATNIYIFNLALADALVTTTTPFQSTVYLMNS-----WPFQDVLCKIVLSID 84
4EA3      KMKATATNIYIFNLALADTLVLLTLPFQGTDLILGF-----WPFGNALCKTVIAID 84
3OE6      KLRSMTDKYRHLHLSVADLLFVITLFPWAVDAVAN-----WYFGNFLCKAVHVIY 82
3RZE      KLHTVGNLYIVLSVADLIVGAVVMPMNIYLMS-----KWSLGRPLCLFWLSMD 80
GPR88     KLQTTSNAFIVNGCAADLSVCLWMPQEAVLGLLPTGSAEPPADWDGAGGSYRLLRGGLL 120
          : : . : . * * . :

2R4R      VLCVTASIE TLCVIAVDRYFAI-TSPFKYQSLLTKNKARVILMVVIVSGLT----- 110
3SN6      VLCVTASIE TLCVIAVDRYFAI-TSPFKYQSLLTKNKARVILMVVIVSGLTSLFLPIQM 143
5A8E      VLCVTASVWTL CVIAIDRYLAI-TSPFRYQSLMTRARAKVIICTVWAI SALVSFLPIMM 145
3PBL      VMMCTASIWNLCAISIDRYTAV-VMPVHYQHGTGQSSCRRVALMITAVVWLAFVSCPLL 138
3MBL      LVLTQSSIFSLLAIAIDRYIAI-RIPLRYNGLVTGTRAKGIIAICWVLSFAIGLTPMLG 141
4DJH      YYNMFTSTFTLTAMSVDRIYAI-CHP-----TSSKAQAVNVAIWALASVVGVPVIM 136
4EA3      TVNLYSSVWILAFISLDRYLAI-VHATNSQRPRKLLAEKVYVGVWIPALLLTPDFIFA 141
3OE6      YVASTASIFSVFILCIDRYRSV-QQPLRYLKYRTKTRASATILGAWFLSFLVWVPIILGW 139
3RZE      GLGLTVSLLSHCLVALNRYLLITRAPATYQALYQRRHTAGMLALS SWALALGLVLLPPWA 180
          * : : : * * :

2R4R      -----SSIVSFYVPLVIMVFVYSRVFQEAQRQLQK 140
3SN6      WYRQE---AINCYAEETCCDFFTNQAYAIASSIVSFYVPLVIMVFVYSRVFQEAQRQLQ 200
5A8E      WWRDEDPQALKCYQDPGCCDFVTNRAYAIASSIISFYIPLLLIMIFVALRVYREAEQIRK 205
3PBL      FGFNTTG-----DPTVCSISNPDFVIYSSVVSFYLPFGVTVLVYARIYVVLKQRRRK 190
3MBL      NNCGQSQCQEGEVACLFEVDVPMNYMVFYFNFFACVLPVLLMLGVLVLRIFLAARRQLRS 201
4DJH      GTKVRED--VDVIECSLQFPDDDYSDWDLFMKICVFI FAFVIVPVLIIIVCYTLMILRLKS 201
4EA3      SAQVED---EEIECLVEIPTP-QDYWGPVFAICIFLFSFIVPVLVISVCYSLMIRRLRG 191
3OE6      NVSEAD---DRYICDRFPND---LWVVVFQFQHIMVGLILPGIVILSCYCIISKL-- 192
3RZE      HRREDK-----CETDFYDVTWFKVMTAIINFYLPVLLMLWYAKIYKAVRQHC-- 187

```

GPR88 PRGAAPPRVHYPALLAAALLAQTALLLHCYLGIVRRVRVSVKRVSVLNFHLLHQLPGC 240

2R4R IDKSEGRF-----HVFCLKEHKALKTLGIIMGTFTLCWLPFFIL- 179  
3SN6 IDKSEGR-----CLKEHKALKTLGIIMGTFTLCWLPFFIVN 236  
5A8E RKTSRVM-----LMREHKALKTLGIIMGVFTLCWLPFFLVN 241  
3PBL -----  
3MBL T-----LQKEVHAAKSLAIIVGLFALCWLPPLHIIN 231  
4DJH VRLLSG-----REKDRNLRRITRLVLVVAVFVVCWTPPIHIFI 239  
4EA3 VRLLSGS-----REKDRNLRRITRLVLVVAVFVGCWTPVQVQFV 230  
3OE6 -----  
3RZE -----  
GPR88 AAAAAFPGAQHAPGPGGAHPAQAPLPPALHPRRAQRRLSGLSVLLCCVFLLATQPL 300

2R4R -----NWIGYVNSGFNPLIYCRSP-DFRIAFQELLCRRSSLK- 216  
3SN6 IVHVIQDNL---IRKEVYILLNWIGYVNSGFNPLIYCRSP-DFRIAFQELLC----- 284  
5A8E IVNVFNRL---VPDWLFVAFNWLGYANSAMNP IILCRSP-DFRKAFK----- 285  
3PBL -----  
3MBL CFTFFCPDCS-HAPLWLMYLAIVLSHTNSVVPFIYAYRIREFRQTFRKIIIRSHVLRQ-- 288  
4DJH LVEALGS----AALSSYYFCIALGYTNSSLNP ILYAFDENFKRCFRDFCFP----- 287  
4EA3 LAQQLGVQPSETAVAILRFCTALGYVNSCLNP ILYAFDENFKACFR----- 278  
3OE6 -----  
3RZE -----  
GPR88 VVWSLASGFSLPVPGVQAASWLLCCALSALNPLLYTWRNEEFRRSVRSVLPVGVGDAAAA 360

2R4R -----  
3SN6 -----  
5A8E -----  
3PBL -----  
3MBL -----  
4DJH -----  
4EA3 -----  
3OE6 -----  
3RZE -----  
GPR88 AVAATAVPAVSQAQLGTRAAGQHW 384

**Figure 2.** Sequence identity of the  $\beta$ 1-adrenergic template (PDB: 5A8E) to human GPR88.

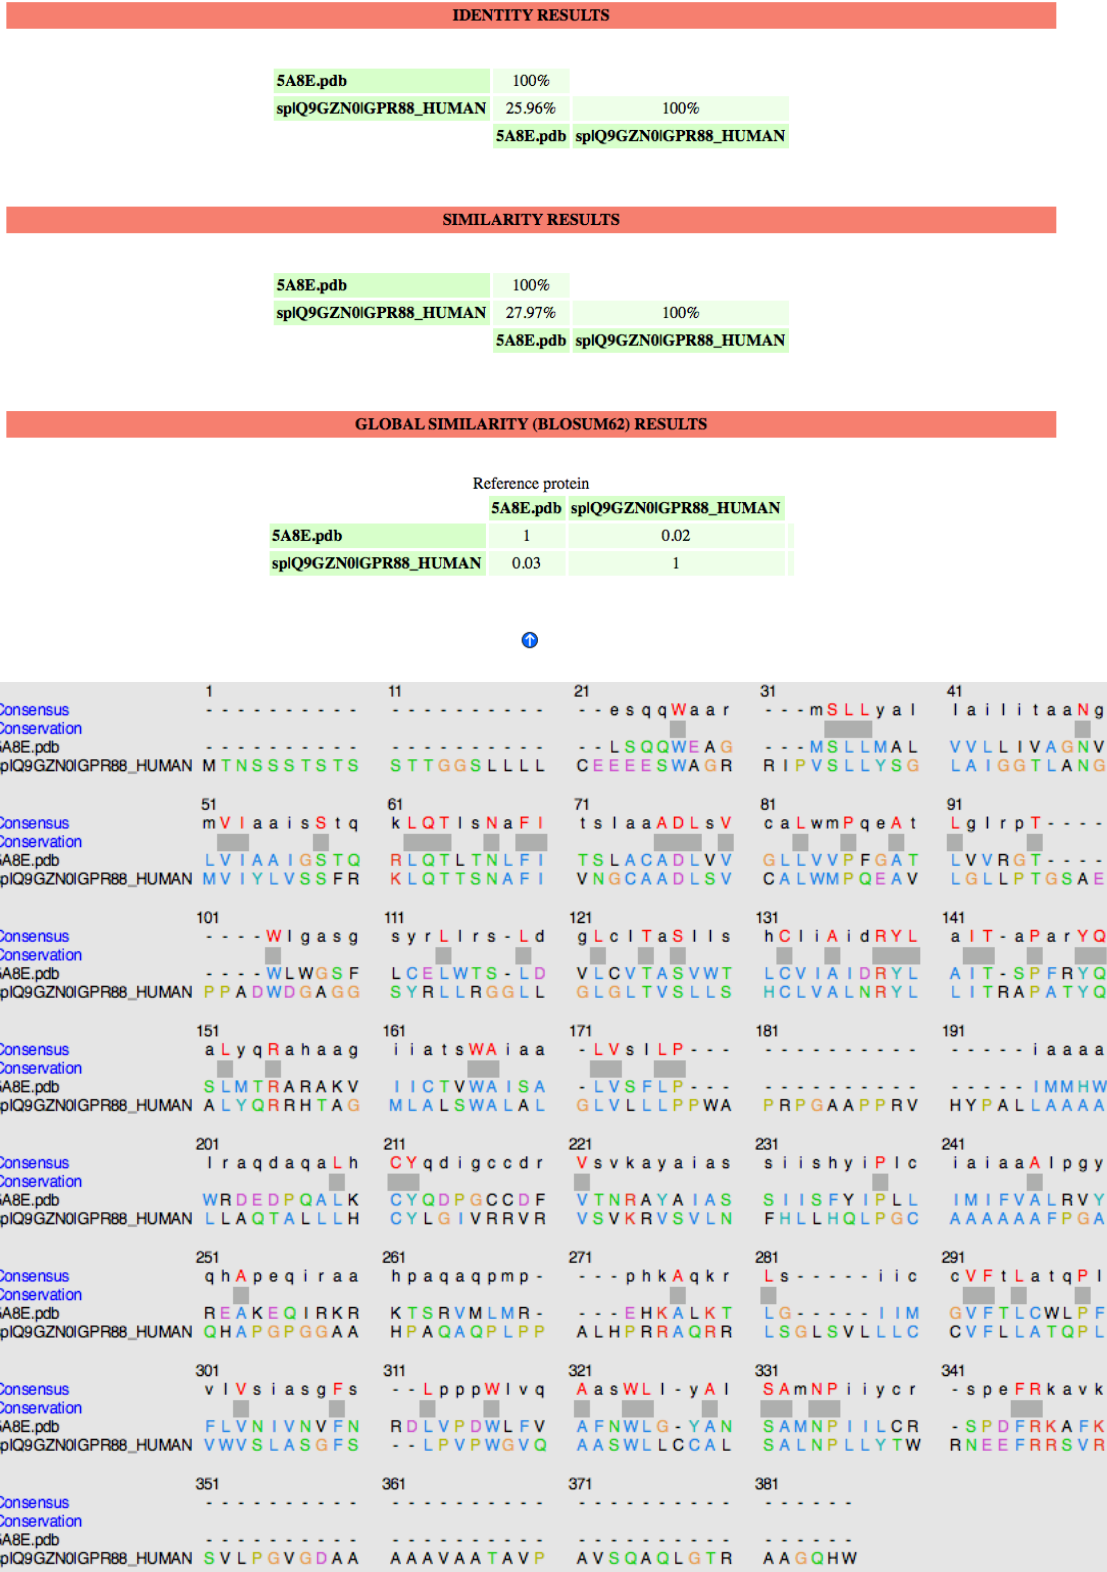

## PDB coordinates for GPR88 homology model.

The initial GPR88 homology model was based on sequence alignment/MODELLER backbone annealing with topological constrains and SCWRL rotamer exploration for non-conserved residues. Note: PDB coordinates are of the initial AMBER-PDB format. The initial model is N- and C-terminal end truncated and does not incorporate loop annealing or equilibration in a membrane/water/ion environment. The latter facets are work in progress and beyond the scope of this work to examine probable binding site characteristics for comparison with our QSAR. This initial model was used in docking and MMGBSA rescoring of docking poses to assess the degree to which the unrefined model was consistent with QSAR/SAR conjectures.

|      |    |     |     |    |        |        |        |
|------|----|-----|-----|----|--------|--------|--------|
| ATOM | 1  | N   | SER | 26 | 30.610 | 41.379 | 37.421 |
| ATOM | 2  | H1  | SER | 26 | 30.858 | 40.800 | 38.210 |
| ATOM | 3  | H2  | SER | 26 | 31.242 | 42.166 | 37.385 |
| ATOM | 4  | H3  | SER | 26 | 30.491 | 40.789 | 36.610 |
| ATOM | 5  | CA  | SER | 26 | 29.274 | 41.962 | 37.680 |
| ATOM | 6  | HA  | SER | 26 | 29.340 | 43.050 | 37.684 |
| ATOM | 7  | CB  | SER | 26 | 28.284 | 41.536 | 36.594 |
| ATOM | 8  | HB2 | SER | 26 | 27.361 | 42.101 | 36.722 |
| ATOM | 9  | HB3 | SER | 26 | 28.716 | 41.763 | 35.619 |
| ATOM | 10 | OG  | SER | 26 | 28.004 | 40.149 | 36.675 |
| ATOM | 11 | HG  | SER | 26 | 27.466 | 39.941 | 36.078 |
| ATOM | 12 | C   | SER | 26 | 28.779 | 41.554 | 39.024 |
| ATOM | 13 | O   | SER | 26 | 29.454 | 40.834 | 39.754 |
| ATOM | 14 | N   | TRP | 27 | 27.593 | 42.066 | 39.398 |
| ATOM | 15 | H   | TRP | 27 | 27.198 | 42.654 | 38.843 |
| ATOM | 16 | CA  | TRP | 27 | 26.958 | 41.707 | 40.629 |
| ATOM | 17 | HA  | TRP | 27 | 26.482 | 40.732 | 40.528 |
| ATOM | 18 | CB  | TRP | 27 | 27.985 | 41.635 | 41.761 |
| ATOM | 19 | HB2 | TRP | 27 | 28.777 | 40.931 | 41.507 |
| ATOM | 20 | HB3 | TRP | 27 | 28.418 | 42.619 | 41.938 |
| ATOM | 21 | CG  | TRP | 27 | 27.409 | 41.179 | 43.066 |
| ATOM | 22 | CD1 | TRP | 27 | 26.960 | 41.968 | 44.085 |
| ATOM | 23 | HD1 | TRP | 27 | 27.027 | 43.046 | 43.938 |
| ATOM | 24 | NE1 | TRP | 27 | 26.502 | 41.191 | 45.121 |
| ATOM | 25 | HE1 | TRP | 27 | 26.147 | 41.518 | 45.924 |
| ATOM | 26 | CE2 | TRP | 27 | 26.651 | 39.870 | 44.779 |
| ATOM | 27 | CZ2 | TRP | 27 | 26.333 | 38.717 | 45.497 |
| ATOM | 28 | HZ2 | TRP | 27 | 25.896 | 38.827 | 46.489 |
| ATOM | 29 | CH2 | TRP | 27 | 26.592 | 37.513 | 44.906 |
| ATOM | 30 | HH2 | TRP | 27 | 26.356 | 36.589 | 45.435 |
| ATOM | 31 | CZ3 | TRP | 27 | 27.157 | 37.438 | 43.628 |
| ATOM | 32 | HZ3 | TRP | 27 | 27.361 | 36.472 | 43.167 |
| ATOM | 33 | CE3 | TRP | 27 | 27.473 | 38.578 | 42.913 |
| ATOM | 34 | HE3 | TRP | 27 | 27.909 | 38.463 | 41.921 |
| ATOM | 35 | CD2 | TRP | 27 | 27.219 | 39.824 | 43.493 |
| ATOM | 36 | C   | TRP | 27 | 25.914 | 42.751 | 40.846 |



|      |    |      |     |    |        |        |        |
|------|----|------|-----|----|--------|--------|--------|
| ATOM | 37 | O    | TRP | 27 | 25.745 | 43.650 | 40.024 |
| ATOM | 38 | N    | ALA | 28 | 25.166 | 42.643 | 41.954 |
| ATOM | 39 | H    | ALA | 28 | 25.272 | 41.929 | 42.492 |
| ATOM | 40 | CA   | ALA | 28 | 24.209 | 43.647 | 42.283 |
| ATOM | 41 | HA   | ALA | 28 | 23.505 | 43.864 | 41.480 |
| ATOM | 42 | CB   | ALA | 28 | 23.424 | 43.245 | 43.522 |
| ATOM | 43 | HB1  | ALA | 28 | 24.115 | 43.033 | 44.338 |
| ATOM | 44 | HB2  | ALA | 28 | 22.760 | 44.059 | 43.812 |
| ATOM | 45 | HB3  | ALA | 28 | 22.834 | 42.355 | 43.306 |
| ATOM | 46 | C    | ALA | 28 | 25.016 | 44.886 | 42.464 |
| ATOM | 47 | O    | ALA | 28 | 24.601 | 45.981 | 42.092 |
| ATOM | 48 | N    | GLY | 29 | 26.229 | 44.720 | 43.021 |
| ATOM | 49 | H    | GLY | 29 | 26.495 | 43.885 | 43.227 |
| ATOM | 50 | CA   | GLY | 29 | 27.090 | 45.831 | 43.287 |
| ATOM | 51 | HA2  | GLY | 29 | 26.618 | 46.526 | 43.981 |
| ATOM | 52 | HA3  | GLY | 29 | 28.039 | 45.492 | 43.703 |
| ATOM | 53 | C    | GLY | 29 | 27.349 | 46.534 | 41.997 |
| ATOM | 54 | O    | GLY | 29 | 27.473 | 47.753 | 41.962 |
| ATOM | 55 | N    | ARG | 30 | 27.504 | 45.799 | 40.889 |
| ATOM | 56 | H    | ARG | 30 | 27.492 | 44.899 | 40.882 |
| ATOM | 57 | CA   | ARG | 30 | 27.696 | 46.521 | 39.669 |
| ATOM | 58 | HA   | ARG | 30 | 28.498 | 47.249 | 39.793 |
| ATOM | 59 | CB   | ARG | 30 | 28.074 | 45.566 | 38.535 |
| ATOM | 60 | HB2  | ARG | 30 | 28.981 | 45.045 | 38.842 |
| ATOM | 61 | HB3  | ARG | 30 | 27.260 | 44.848 | 38.435 |
| ATOM | 62 | CG   | ARG | 30 | 28.312 | 46.252 | 37.199 |
| ATOM | 63 | HG2  | ARG | 30 | 28.517 | 45.489 | 36.448 |
| ATOM | 64 | HG3  | ARG | 30 | 27.410 | 46.799 | 36.924 |
| ATOM | 65 | CD   | ARG | 30 | 29.485 | 47.215 | 37.275 |
| ATOM | 66 | HD2  | ARG | 30 | 29.260 | 47.989 | 38.008 |
| ATOM | 67 | HD3  | ARG | 30 | 30.375 | 46.669 | 37.586 |
| ATOM | 68 | NE   | ARG | 30 | 29.753 | 47.853 | 35.988 |
| ATOM | 69 | HE   | ARG | 30 | 29.375 | 47.511 | 35.294 |
| ATOM | 70 | CZ   | ARG | 30 | 30.534 | 48.917 | 35.830 |
| ATOM | 71 | NH1  | ARG | 30 | 30.719 | 49.430 | 34.621 |
| ATOM | 72 | HH11 | ARG | 30 | 30.334 | 49.074 | 33.939 |
| ATOM | 73 | HH12 | ARG | 30 | 31.224 | 50.118 | 34.519 |
| ATOM | 74 | NH2  | ARG | 30 | 31.128 | 49.465 | 36.881 |
| ATOM | 75 | HH21 | ARG | 30 | 31.008 | 49.133 | 37.665 |
| ATOM | 76 | HH22 | ARG | 30 | 31.633 | 50.154 | 36.778 |
| ATOM | 77 | C    | ARG | 30 | 26.429 | 47.265 | 39.373 |
| ATOM | 78 | O    | ARG | 30 | 26.451 | 48.434 | 38.987 |
| ATOM | 79 | N    | ARG | 31 | 25.279 | 46.594 | 39.578 |
| ATOM | 80 | H    | ARG | 31 | 25.331 | 45.776 | 39.951 |
| ATOM | 81 | CA   | ARG | 31 | 24.000 | 47.142 | 39.223 |
| ATOM | 82 | HA   | ARG | 31 | 24.005 | 47.442 | 38.175 |
| ATOM | 83 | CB   | ARG | 31 | 22.896 | 46.103 | 39.429 |
| ATOM | 84 | HB2  | ARG | 31 | 23.156 | 45.234 | 38.824 |
| ATOM | 85 | HB3  | ARG | 31 | 22.907 | 45.827 | 40.484 |
| ATOM | 86 | CG   | ARG | 31 | 21.507 | 46.589 | 39.047 |
| ATOM | 87 | HG2  | ARG | 31 | 21.298 | 47.509 | 39.594 |
| ATOM | 88 | HG3  | ARG | 31 | 21.492 | 46.792 | 37.976 |

|      |     |      |     |    |        |        |        |
|------|-----|------|-----|----|--------|--------|--------|
| ATOM | 89  | CD   | ARG | 31 | 20.448 | 45.550 | 39.380 |
| ATOM | 90  | HD2  | ARG | 31 | 19.479 | 45.905 | 39.027 |
| ATOM | 91  | HD3  | ARG | 31 | 20.697 | 44.616 | 38.877 |
| ATOM | 92  | NE   | ARG | 31 | 20.360 | 45.299 | 40.816 |
| ATOM | 93  | HE   | ARG | 31 | 20.730 | 44.580 | 41.112 |
| ATOM | 94  | CZ   | ARG | 31 | 19.750 | 46.105 | 41.679 |
| ATOM | 95  | NH1  | ARG | 31 | 19.720 | 45.795 | 42.968 |
| ATOM | 96  | HH11 | ARG | 31 | 20.095 | 45.072 | 43.246 |
| ATOM | 97  | HH12 | ARG | 31 | 19.325 | 46.316 | 43.527 |
| ATOM | 98  | NH2  | ARG | 31 | 19.172 | 47.219 | 41.252 |
| ATOM | 99  | HH21 | ARG | 31 | 19.192 | 47.420 | 40.416 |
| ATOM | 100 | HH22 | ARG | 31 | 18.778 | 47.741 | 41.810 |
| ATOM | 101 | C    | ARG | 31 | 23.663 | 48.379 | 39.999 |
| ATOM | 102 | O    | ARG | 31 | 23.247 | 49.377 | 39.411 |
| ATOM | 103 | N    | ILE | 32 | 23.823 | 48.376 | 41.336 |
| ATOM | 104 | H    | ILE | 32 | 24.188 | 47.695 | 41.798 |
| ATOM | 105 | CA   | ILE | 32 | 23.370 | 49.551 | 42.027 |
| ATOM | 106 | HA   | ILE | 32 | 22.371 | 49.849 | 41.709 |
| ATOM | 107 | CB   | ILE | 32 | 23.384 | 49.349 | 43.554 |
| ATOM | 108 | HB   | ILE | 32 | 24.347 | 48.931 | 43.847 |
| ATOM | 109 | CG2  | ILE | 32 | 23.168 | 50.674 | 44.269 |
| ATOM | 110 | HG21 | ILE | 32 | 22.205 | 51.093 | 43.976 |
| ATOM | 111 | HG22 | ILE | 32 | 23.181 | 50.512 | 45.347 |
| ATOM | 112 | HG23 | ILE | 32 | 23.963 | 51.368 | 43.997 |
| ATOM | 113 | CG1  | ILE | 32 | 22.344 | 48.304 | 43.963 |
| ATOM | 114 | HG12 | ILE | 32 | 21.361 | 48.750 | 43.814 |
| ATOM | 115 | HG13 | ILE | 32 | 22.461 | 47.452 | 43.294 |
| ATOM | 116 | CD1  | ILE | 32 | 22.475 | 47.840 | 45.397 |
| ATOM | 117 | HD11 | ILE | 32 | 22.358 | 48.692 | 46.067 |
| ATOM | 118 | HD12 | ILE | 32 | 21.704 | 47.100 | 45.612 |
| ATOM | 119 | HD13 | ILE | 32 | 23.458 | 47.393 | 45.546 |
| ATOM | 120 | C    | ILE | 32 | 24.207 | 50.743 | 41.659 |
| ATOM | 121 | O    | ILE | 32 | 23.647 | 51.787 | 41.331 |
| ATOM | 122 | N    | PRO | 33 | 25.512 | 50.665 | 41.690 |
| ATOM | 123 | CD   | PRO | 33 | 26.386 | 49.622 | 42.361 |
| ATOM | 124 | HD2  | PRO | 33 | 26.588 | 48.795 | 41.680 |
| ATOM | 125 | HD3  | PRO | 33 | 25.906 | 49.241 | 43.262 |
| ATOM | 126 | CG   | PRO | 33 | 27.615 | 50.433 | 42.665 |
| ATOM | 127 | HG2  | PRO | 33 | 28.489 | 49.781 | 42.668 |
| ATOM | 128 | HG3  | PRO | 33 | 27.508 | 50.901 | 43.644 |
| ATOM | 129 | CB   | PRO | 33 | 27.707 | 51.463 | 41.589 |
| ATOM | 130 | HB2  | PRO | 33 | 28.196 | 51.089 | 40.689 |
| ATOM | 131 | HB3  | PRO | 33 | 28.239 | 52.342 | 41.952 |
| ATOM | 132 | CA   | PRO | 33 | 26.253 | 51.824 | 41.279 |
| ATOM | 133 | HA   | PRO | 33 | 25.898 | 52.645 | 41.901 |
| ATOM | 134 | C    | PRO | 33 | 26.136 | 52.205 | 39.837 |
| ATOM | 135 | O    | PRO | 33 | 26.298 | 53.386 | 39.537 |
| ATOM | 136 | N    | VAL | 34 | 25.891 | 51.250 | 38.921 |
| ATOM | 137 | H    | VAL | 34 | 25.807 | 50.389 | 39.169 |
| ATOM | 138 | CA   | VAL | 34 | 25.763 | 51.615 | 37.539 |
| ATOM | 139 | HA   | VAL | 34 | 26.585 | 52.254 | 37.216 |
| ATOM | 140 | CB   | VAL | 34 | 25.718 | 50.373 | 36.629 |

|      |     |      |     |    |        |        |        |
|------|-----|------|-----|----|--------|--------|--------|
| ATOM | 141 | HB   | VAL | 34 | 24.946 | 49.695 | 36.993 |
| ATOM | 142 | CG1  | VAL | 34 | 25.405 | 50.774 | 35.196 |
| ATOM | 143 | HG11 | VAL | 34 | 26.176 | 51.452 | 34.831 |
| ATOM | 144 | HG12 | VAL | 34 | 25.377 | 49.884 | 34.567 |
| ATOM | 145 | HG13 | VAL | 34 | 24.437 | 51.273 | 35.161 |
| ATOM | 146 | CG2  | VAL | 34 | 27.033 | 49.614 | 36.699 |
| ATOM | 147 | HG21 | VAL | 34 | 27.214 | 49.294 | 37.725 |
| ATOM | 148 | HG22 | VAL | 34 | 26.983 | 48.740 | 36.050 |
| ATOM | 149 | HG23 | VAL | 34 | 27.845 | 50.263 | 36.372 |
| ATOM | 150 | C    | VAL | 34 | 24.529 | 52.445 | 37.397 |
| ATOM | 151 | O    | VAL | 34 | 24.501 | 53.426 | 36.655 |
| ATOM | 152 | N    | SER | 35 | 23.470 | 52.068 | 38.135 |
| ATOM | 153 | H    | SER | 35 | 23.563 | 51.371 | 38.697 |
| ATOM | 154 | CA   | SER | 35 | 22.216 | 52.749 | 38.041 |
| ATOM | 155 | HA   | SER | 35 | 21.860 | 52.727 | 37.011 |
| ATOM | 156 | CB   | SER | 35 | 21.172 | 52.075 | 38.934 |
| ATOM | 157 | HB2  | SER | 35 | 21.566 | 52.017 | 39.949 |
| ATOM | 158 | HB3  | SER | 35 | 20.266 | 52.681 | 38.931 |
| ATOM | 159 | OG   | SER | 35 | 20.869 | 50.771 | 38.470 |
| ATOM | 160 | HG   | SER | 35 | 21.559 | 50.310 | 38.473 |
| ATOM | 161 | C    | SER | 35 | 22.402 | 54.183 | 38.421 |
| ATOM | 162 | O    | SER | 35 | 21.840 | 55.073 | 37.785 |
| ATOM | 163 | N    | LEU | 36 | 23.202 | 54.448 | 39.468 |
| ATOM | 164 | H    | LEU | 36 | 23.624 | 53.767 | 39.878 |
| ATOM | 165 | CA   | LEU | 36 | 23.389 | 55.794 | 39.934 |
| ATOM | 166 | HA   | LEU | 36 | 22.420 | 56.260 | 40.114 |
| ATOM | 167 | CB   | LEU | 36 | 24.186 | 55.803 | 41.240 |
| ATOM | 168 | HB2  | LEU | 36 | 25.070 | 55.208 | 41.012 |
| ATOM | 169 | HB3  | LEU | 36 | 24.484 | 56.831 | 41.447 |
| ATOM | 170 | CG   | LEU | 36 | 23.482 | 55.220 | 42.467 |
| ATOM | 171 | HG   | LEU | 36 | 23.114 | 54.224 | 42.222 |
| ATOM | 172 | CD1  | LEU | 36 | 24.441 | 55.131 | 43.645 |
| ATOM | 173 | HD11 | LEU | 36 | 24.809 | 56.127 | 43.890 |
| ATOM | 174 | HD12 | LEU | 36 | 23.921 | 54.714 | 44.507 |
| ATOM | 175 | HD13 | LEU | 36 | 25.281 | 54.488 | 43.382 |
| ATOM | 176 | CD2  | LEU | 36 | 22.266 | 56.055 | 42.837 |
| ATOM | 177 | HD21 | LEU | 36 | 21.565 | 56.067 | 42.002 |
| ATOM | 178 | HD22 | LEU | 36 | 21.780 | 55.623 | 43.712 |
| ATOM | 179 | HD23 | LEU | 36 | 22.579 | 57.074 | 43.063 |
| ATOM | 180 | C    | LEU | 36 | 24.084 | 56.575 | 38.862 |
| ATOM | 181 | O    | LEU | 36 | 23.735 | 57.723 | 38.590 |
| ATOM | 182 | N    | LEU | 37 | 25.089 | 55.965 | 38.207 |
| ATOM | 183 | H    | LEU | 37 | 25.281 | 55.105 | 38.390 |
| ATOM | 184 | CA   | LEU | 37 | 25.853 | 56.676 | 37.222 |
| ATOM | 185 | HA   | LEU | 37 | 26.270 | 57.582 | 37.662 |
| ATOM | 186 | CB   | LEU | 37 | 27.003 | 55.808 | 36.707 |
| ATOM | 187 | HB2  | LEU | 37 | 26.520 | 54.872 | 36.427 |
| ATOM | 188 | HB3  | LEU | 37 | 27.413 | 56.285 | 35.817 |
| ATOM | 189 | CG   | LEU | 37 | 28.133 | 55.521 | 37.698 |
| ATOM | 190 | HG   | LEU | 37 | 27.703 | 55.127 | 38.619 |
| ATOM | 191 | CD1  | LEU | 37 | 29.109 | 54.508 | 37.121 |
| ATOM | 192 | HD11 | LEU | 37 | 29.540 | 54.901 | 36.200 |

|      |     |      |     |    |        |        |        |
|------|-----|------|-----|----|--------|--------|--------|
| ATOM | 193 | HD12 | LEU | 37 | 29.905 | 54.318 | 37.841 |
| ATOM | 194 | HD13 | LEU | 37 | 28.583 | 53.577 | 36.907 |
| ATOM | 195 | CD2  | LEU | 37 | 28.860 | 56.804 | 38.070 |
| ATOM | 196 | HD21 | LEU | 37 | 28.158 | 57.500 | 38.529 |
| ATOM | 197 | HD22 | LEU | 37 | 29.660 | 56.578 | 38.775 |
| ATOM | 198 | HD23 | LEU | 37 | 29.284 | 57.255 | 37.173 |
| ATOM | 199 | C    | LEU | 37 | 24.948 | 57.090 | 36.108 |
| ATOM | 200 | O    | LEU | 37 | 25.024 | 58.217 | 35.618 |
| ATOM | 201 | N    | TYR | 38 | 24.052 | 56.183 | 35.682 |
| ATOM | 202 | H    | TYR | 38 | 24.018 | 55.380 | 36.087 |
| ATOM | 203 | CA   | TYR | 38 | 23.159 | 56.479 | 34.600 |
| ATOM | 204 | HA   | TYR | 38 | 23.728 | 56.819 | 33.735 |
| ATOM | 205 | CB   | TYR | 38 | 22.365 | 55.233 | 34.204 |
| ATOM | 206 | HB2  | TYR | 38 | 21.969 | 54.797 | 35.121 |
| ATOM | 207 | HB3  | TYR | 38 | 21.539 | 55.563 | 33.573 |
| ATOM | 208 | CG   | TYR | 38 | 23.180 | 54.196 | 33.465 |
| ATOM | 209 | CD1  | TYR | 38 | 23.349 | 52.920 | 33.987 |
| ATOM | 210 | HD1  | TYR | 38 | 22.882 | 52.678 | 34.942 |
| ATOM | 211 | CE1  | TYR | 38 | 24.093 | 51.965 | 33.319 |
| ATOM | 212 | HE1  | TYR | 38 | 24.218 | 50.968 | 33.740 |
| ATOM | 213 | CZ   | TYR | 38 | 24.679 | 52.282 | 32.112 |
| ATOM | 214 | OH   | TYR | 38 | 25.419 | 51.333 | 31.445 |
| ATOM | 215 | HH   | TYR | 38 | 25.711 | 51.658 | 30.738 |
| ATOM | 216 | CE2  | TYR | 38 | 24.525 | 53.555 | 31.566 |
| ATOM | 217 | HE2  | TYR | 38 | 24.986 | 53.812 | 30.612 |
| ATOM | 218 | CD2  | TYR | 38 | 23.778 | 54.496 | 32.248 |
| ATOM | 219 | HD2  | TYR | 38 | 23.649 | 55.495 | 31.832 |
| ATOM | 220 | C    | TYR | 38 | 22.231 | 57.590 | 34.972 |
| ATOM | 221 | O    | TYR | 38 | 21.926 | 58.444 | 34.140 |
| ATOM | 222 | N    | SER | 39 | 21.744 | 57.612 | 36.226 |
| ATOM | 223 | H    | SER | 39 | 21.984 | 56.987 | 36.828 |
| ATOM | 224 | CA   | SER | 39 | 20.829 | 58.653 | 36.598 |
| ATOM | 225 | HA   | SER | 39 | 19.967 | 58.643 | 35.931 |
| ATOM | 226 | CB   | SER | 39 | 20.339 | 58.448 | 38.033 |
| ATOM | 227 | HB2  | SER | 39 | 21.205 | 58.368 | 38.690 |
| ATOM | 228 | HB3  | SER | 39 | 19.741 | 59.311 | 38.324 |
| ATOM | 229 | OG   | SER | 39 | 19.555 | 57.272 | 38.141 |
| ATOM | 230 | HG   | SER | 39 | 20.011 | 56.615 | 37.919 |
| ATOM | 231 | C    | SER | 39 | 21.522 | 59.971 | 36.437 |
| ATOM | 232 | O    | SER | 39 | 20.920 | 60.949 | 35.994 |
| ATOM | 233 | N    | GLY | 40 | 22.819 | 60.030 | 36.791 |
| ATOM | 234 | H    | GLY | 40 | 23.220 | 59.284 | 37.096 |
| ATOM | 235 | CA   | GLY | 40 | 23.562 | 61.254 | 36.690 |
| ATOM | 236 | HA2  | GLY | 40 | 23.058 | 62.038 | 37.255 |
| ATOM | 237 | HA3  | GLY | 40 | 24.566 | 61.109 | 37.088 |
| ATOM | 238 | C    | GLY | 40 | 23.662 | 61.674 | 35.256 |
| ATOM | 239 | O    | GLY | 40 | 23.593 | 62.861 | 34.949 |
| ATOM | 240 | N    | LEU | 41 | 23.879 | 60.715 | 34.338 |
| ATOM | 241 | H    | LEU | 41 | 23.945 | 59.857 | 34.601 |
| ATOM | 242 | CA   | LEU | 41 | 24.005 | 61.052 | 32.947 |
| ATOM | 243 | HA   | LEU | 41 | 24.730 | 61.857 | 32.827 |
| ATOM | 244 | CB   | LEU | 41 | 24.482 | 59.841 | 32.143 |

|      |     |      |     |    |        |        |        |
|------|-----|------|-----|----|--------|--------|--------|
| ATOM | 245 | HB2  | LEU | 41 | 23.785 | 59.051 | 32.421 |
| ATOM | 246 | HB3  | LEU | 41 | 24.365 | 60.072 | 31.084 |
| ATOM | 247 | CG   | LEU | 41 | 25.914 | 59.373 | 32.407 |
| ATOM | 248 | HG   | LEU | 41 | 26.045 | 59.226 | 33.479 |
| ATOM | 249 | CD1  | LEU | 41 | 26.197 | 58.068 | 31.679 |
| ATOM | 250 | HD11 | LEU | 41 | 26.067 | 58.214 | 30.607 |
| ATOM | 251 | HD12 | LEU | 41 | 27.221 | 57.753 | 31.881 |
| ATOM | 252 | HD13 | LEU | 41 | 25.506 | 57.300 | 32.027 |
| ATOM | 253 | CD2  | LEU | 41 | 26.914 | 60.440 | 31.988 |
| ATOM | 254 | HD21 | LEU | 41 | 26.732 | 61.353 | 32.556 |
| ATOM | 255 | HD22 | LEU | 41 | 27.926 | 60.087 | 32.184 |
| ATOM | 256 | HD23 | LEU | 41 | 26.802 | 60.646 | 30.924 |
| ATOM | 257 | C    | LEU | 41 | 22.679 | 61.551 | 32.449 |
| ATOM | 258 | O    | LEU | 41 | 22.621 | 62.510 | 31.680 |
| ATOM | 259 | N    | ALA | 42 | 21.573 | 60.902 | 32.868 |
| ATOM | 260 | H    | ALA | 42 | 21.655 | 60.215 | 33.444 |
| ATOM | 261 | CA   | ALA | 42 | 20.272 | 61.298 | 32.403 |
| ATOM | 262 | HA   | ALA | 42 | 20.226 | 61.313 | 31.314 |
| ATOM | 263 | CB   | ALA | 42 | 19.210 | 60.341 | 32.921 |
| ATOM | 264 | HB1  | ALA | 42 | 19.237 | 60.322 | 34.010 |
| ATOM | 265 | HB2  | ALA | 42 | 18.227 | 60.674 | 32.588 |
| ATOM | 266 | HB3  | ALA | 42 | 19.403 | 59.340 | 32.536 |
| ATOM | 267 | C    | ALA | 42 | 20.032 | 62.694 | 32.860 |
| ATOM | 268 | O    | ALA | 42 | 19.617 | 63.553 | 32.083 |
| ATOM | 269 | N    | ILE | 43 | 20.310 | 62.964 | 34.145 |
| ATOM | 270 | H    | ILE | 43 | 20.554 | 62.312 | 34.716 |
| ATOM | 271 | CA   | ILE | 43 | 20.213 | 64.312 | 34.601 |
| ATOM | 272 | HA   | ILE | 43 | 19.309 | 64.800 | 34.237 |
| ATOM | 273 | CB   | ILE | 43 | 20.255 | 64.392 | 36.138 |
| ATOM | 274 | HB   | ILE | 43 | 20.213 | 65.439 | 36.440 |
| ATOM | 275 | CG2  | ILE | 43 | 19.078 | 63.642 | 36.743 |
| ATOM | 276 | HG21 | ILE | 43 | 19.120 | 62.595 | 36.442 |
| ATOM | 277 | HG22 | ILE | 43 | 19.124 | 63.709 | 37.830 |
| ATOM | 278 | HG23 | ILE | 43 | 18.146 | 64.083 | 36.391 |
| ATOM | 279 | CG1  | ILE | 43 | 21.594 | 63.870 | 36.663 |
| ATOM | 280 | HG12 | ILE | 43 | 21.619 | 62.796 | 36.476 |
| ATOM | 281 | HG13 | ILE | 43 | 22.380 | 64.357 | 36.086 |
| ATOM | 282 | CD1  | ILE | 43 | 21.815 | 64.130 | 38.137 |
| ATOM | 283 | HD11 | ILE | 43 | 21.029 | 63.643 | 38.714 |
| ATOM | 284 | HD12 | ILE | 43 | 22.785 | 63.732 | 38.435 |
| ATOM | 285 | HD13 | ILE | 43 | 21.790 | 65.203 | 38.325 |
| ATOM | 286 | C    | ILE | 43 | 21.360 | 64.961 | 33.918 |
| ATOM | 287 | O    | ILE | 43 | 22.248 | 64.319 | 33.394 |
| ATOM | 288 | N    | GLY | 44 | 21.372 | 66.251 | 33.706 |
| ATOM | 289 | H    | GLY | 44 | 20.745 | 66.866 | 33.901 |
| ATOM | 290 | CA   | GLY | 44 | 22.591 | 66.648 | 33.072 |
| ATOM | 291 | HA2  | GLY | 44 | 22.897 | 67.644 | 33.393 |
| ATOM | 292 | HA3  | GLY | 44 | 23.392 | 65.938 | 33.277 |
| ATOM | 293 | C    | GLY | 44 | 22.327 | 66.671 | 31.604 |
| ATOM | 294 | O    | GLY | 44 | 22.417 | 67.722 | 30.980 |
| ATOM | 295 | N    | GLY | 45 | 22.007 | 65.509 | 30.996 |
| ATOM | 296 | H    | GLY | 45 | 22.008 | 64.723 | 31.435 |

|      |     |      |     |    |        |        |        |
|------|-----|------|-----|----|--------|--------|--------|
| ATOM | 297 | CA   | GLY | 45 | 21.658 | 65.553 | 29.609 |
| ATOM | 298 | HA2  | GLY | 45 | 22.392 | 66.111 | 29.027 |
| ATOM | 299 | HA3  | GLY | 45 | 21.547 | 64.553 | 29.190 |
| ATOM | 300 | C    | GLY | 45 | 20.346 | 66.257 | 29.538 |
| ATOM | 301 | O    | GLY | 45 | 20.153 | 67.175 | 28.744 |
| ATOM | 302 | N    | THR | 46 | 19.399 | 65.821 | 30.392 |
| ATOM | 303 | H    | THR | 46 | 19.602 | 65.161 | 30.969 |
| ATOM | 304 | CA   | THR | 46 | 18.085 | 66.392 | 30.391 |
| ATOM | 305 | HA   | THR | 46 | 17.715 | 66.433 | 29.366 |
| ATOM | 306 | CB   | THR | 46 | 17.105 | 65.555 | 31.235 |
| ATOM | 307 | HB   | THR | 46 | 17.480 | 65.493 | 32.257 |
| ATOM | 308 | CG2  | THR | 46 | 15.726 | 66.196 | 31.240 |
| ATOM | 309 | HG21 | THR | 46 | 15.350 | 66.258 | 30.219 |
| ATOM | 310 | HG22 | THR | 46 | 15.046 | 65.592 | 31.841 |
| ATOM | 311 | HG23 | THR | 46 | 15.792 | 67.198 | 31.664 |
| ATOM | 312 | OG1  | THR | 46 | 16.997 | 64.238 | 30.681 |
| ATOM | 313 | HG1  | THR | 46 | 17.744 | 63.876 | 30.684 |
| ATOM | 314 | C    | THR | 46 | 18.130 | 67.795 | 30.907 |
| ATOM | 315 | O    | THR | 46 | 17.556 | 68.701 | 30.303 |
| ATOM | 316 | N    | LEU | 47 | 18.836 | 68.012 | 32.035 |
| ATOM | 317 | H    | LEU | 47 | 19.302 | 67.335 | 32.401 |
| ATOM | 318 | CA   | LEU | 47 | 18.849 | 69.310 | 32.653 |
| ATOM | 319 | HA   | LEU | 47 | 17.827 | 69.662 | 32.794 |
| ATOM | 320 | CB   | LEU | 47 | 19.537 | 69.247 | 34.018 |
| ATOM | 321 | HB2  | LEU | 47 | 18.931 | 68.540 | 34.584 |
| ATOM | 322 | HB3  | LEU | 47 | 20.535 | 68.834 | 33.873 |
| ATOM | 323 | CG   | LEU | 47 | 19.637 | 70.565 | 34.789 |
| ATOM | 324 | HG   | LEU | 47 | 20.205 | 71.280 | 34.193 |
| ATOM | 325 | CD1  | LEU | 47 | 18.253 | 71.128 | 35.073 |
| ATOM | 326 | HD11 | LEU | 47 | 17.685 | 70.414 | 35.669 |
| ATOM | 327 | HD12 | LEU | 47 | 18.347 | 72.065 | 35.622 |
| ATOM | 328 | HD13 | LEU | 47 | 17.734 | 71.309 | 34.132 |
| ATOM | 329 | CD2  | LEU | 47 | 20.406 | 70.372 | 36.087 |
| ATOM | 330 | HD21 | LEU | 47 | 21.412 | 70.017 | 35.864 |
| ATOM | 331 | HD22 | LEU | 47 | 20.465 | 71.321 | 36.619 |
| ATOM | 332 | HD23 | LEU | 47 | 19.892 | 69.639 | 36.709 |
| ATOM | 333 | C    | LEU | 47 | 19.540 | 70.271 | 31.741 |
| ATOM | 334 | O    | LEU | 47 | 19.059 | 71.382 | 31.512 |
| ATOM | 335 | N    | ALA | 48 | 20.691 | 69.858 | 31.181 |
| ATOM | 336 | H    | ALA | 48 | 20.988 | 69.017 | 31.301 |
| ATOM | 337 | CA   | ALA | 48 | 21.449 | 70.779 | 30.383 |
| ATOM | 338 | HA   | ALA | 48 | 21.646 | 71.680 | 30.964 |
| ATOM | 339 | CB   | ALA | 48 | 22.779 | 70.161 | 29.979 |
| ATOM | 340 | HB1  | ALA | 48 | 22.598 | 69.263 | 29.389 |
| ATOM | 341 | HB2  | ALA | 48 | 23.348 | 70.877 | 29.386 |
| ATOM | 342 | HB3  | ALA | 48 | 23.345 | 69.900 | 30.873 |
| ATOM | 343 | C    | ALA | 48 | 20.674 | 71.189 | 29.168 |
| ATOM | 344 | O    | ALA | 48 | 20.658 | 72.366 | 28.810 |
| ATOM | 345 | N    | ASN | 49 | 20.005 | 70.229 | 28.503 |
| ATOM | 346 | H    | ASN | 49 | 20.016 | 69.388 | 28.824 |
| ATOM | 347 | CA   | ASN | 49 | 19.280 | 70.529 | 27.298 |
| ATOM | 348 | HA   | ASN | 49 | 19.912 | 71.102 | 26.620 |

|      |     |      |     |    |        |        |        |
|------|-----|------|-----|----|--------|--------|--------|
| ATOM | 349 | CB   | ASN | 49 | 18.852 | 69.239 | 26.595 |
| ATOM | 350 | HB2  | ASN | 49 | 18.468 | 68.545 | 27.342 |
| ATOM | 351 | HB3  | ASN | 49 | 18.064 | 69.474 | 25.879 |
| ATOM | 352 | CG   | ASN | 49 | 19.994 | 68.572 | 25.856 |
| ATOM | 353 | OD1  | ASN | 49 | 20.635 | 69.183 | 25.001 |
| ATOM | 354 | ND2  | ASN | 49 | 20.253 | 67.311 | 26.183 |
| ATOM | 355 | HD21 | ASN | 49 | 20.921 | 66.868 | 25.774 |
| ATOM | 356 | HD22 | ASN | 49 | 19.760 | 66.900 | 26.814 |
| ATOM | 357 | C    | ASN | 49 | 18.096 | 71.392 | 27.595 |
| ATOM | 358 | O    | ASN | 49 | 17.683 | 72.190 | 26.755 |
| ATOM | 359 | N    | GLY | 50 | 17.472 | 71.210 | 28.773 |
| ATOM | 360 | H    | GLY | 50 | 17.760 | 70.572 | 29.339 |
| ATOM | 361 | CA   | GLY | 50 | 16.349 | 72.031 | 29.128 |
| ATOM | 362 | HA2  | GLY | 50 | 15.594 | 71.997 | 28.342 |
| ATOM | 363 | HA3  | GLY | 50 | 15.912 | 71.687 | 30.065 |
| ATOM | 364 | C    | GLY | 50 | 16.813 | 73.446 | 29.297 |
| ATOM | 365 | O    | GLY | 50 | 16.130 | 74.386 | 28.896 |
| ATOM | 366 | N    | MET | 51 | 17.993 | 73.641 | 29.914 |
| ATOM | 367 | H    | MET | 51 | 18.492 | 72.938 | 30.173 |
| ATOM | 368 | CA   | MET | 51 | 18.455 | 74.979 | 30.158 |
| ATOM | 369 | HA   | MET | 51 | 17.692 | 75.540 | 30.698 |
| ATOM | 370 | CB   | MET | 51 | 19.734 | 74.960 | 30.998 |
| ATOM | 371 | HB2  | MET | 51 | 20.433 | 74.286 | 30.503 |
| ATOM | 372 | HB3  | MET | 51 | 20.139 | 75.972 | 30.990 |
| ATOM | 373 | CG   | MET | 51 | 19.526 | 74.509 | 32.435 |
| ATOM | 374 | HG2  | MET | 51 | 18.894 | 75.244 | 32.933 |
| ATOM | 375 | HG3  | MET | 51 | 19.017 | 73.545 | 32.418 |
| ATOM | 376 | SD   | MET | 51 | 21.074 | 74.346 | 33.344 |
| ATOM | 377 | CE   | MET | 51 | 21.566 | 76.062 | 33.487 |
| ATOM | 378 | HE1  | MET | 51 | 20.799 | 76.616 | 34.028 |
| ATOM | 379 | HE2  | MET | 51 | 22.510 | 76.126 | 34.028 |
| ATOM | 380 | HE3  | MET | 51 | 21.688 | 76.490 | 32.492 |
| ATOM | 381 | C    | MET | 51 | 18.687 | 75.687 | 28.862 |
| ATOM | 382 | O    | MET | 51 | 18.314 | 76.849 | 28.721 |
| ATOM | 383 | N    | VAL | 52 | 19.298 | 75.009 | 27.870 |
| ATOM | 384 | H    | VAL | 52 | 19.523 | 74.144 | 27.973 |
| ATOM | 385 | CA   | VAL | 52 | 19.589 | 75.685 | 26.637 |
| ATOM | 386 | HA   | VAL | 52 | 20.159 | 76.599 | 26.806 |
| ATOM | 387 | CB   | VAL | 52 | 20.381 | 74.783 | 25.672 |
| ATOM | 388 | HB   | VAL | 52 | 20.482 | 75.292 | 24.713 |
| ATOM | 389 | CG1  | VAL | 52 | 21.762 | 74.484 | 26.235 |
| ATOM | 390 | HG11 | VAL | 52 | 21.662 | 73.975 | 27.193 |
| ATOM | 391 | HG12 | VAL | 52 | 22.308 | 73.846 | 25.540 |
| ATOM | 392 | HG13 | VAL | 52 | 22.308 | 75.417 | 26.375 |
| ATOM | 393 | CG2  | VAL | 52 | 19.621 | 73.494 | 25.403 |
| ATOM | 394 | HG21 | VAL | 52 | 18.655 | 73.728 | 24.956 |
| ATOM | 395 | HG22 | VAL | 52 | 20.195 | 72.869 | 24.719 |
| ATOM | 396 | HG23 | VAL | 52 | 19.467 | 72.960 | 26.341 |
| ATOM | 397 | C    | VAL | 52 | 18.311 | 76.139 | 26.009 |
| ATOM | 398 | O    | VAL | 52 | 18.220 | 77.268 | 25.531 |
| ATOM | 399 | N    | ILE | 53 | 17.285 | 75.270 | 25.999 |
| ATOM | 400 | H    | ILE | 53 | 17.397 | 74.467 | 26.390 |

|      |     |      |     |    |        |        |        |
|------|-----|------|-----|----|--------|--------|--------|
| ATOM | 401 | CA   | ILE | 53 | 16.032 | 75.599 | 25.384 |
| ATOM | 402 | HA   | ILE | 53 | 16.166 | 76.020 | 24.388 |
| ATOM | 403 | CB   | ILE | 53 | 15.104 | 74.373 | 25.302 |
| ATOM | 404 | HB   | ILE | 53 | 15.079 | 73.882 | 26.275 |
| ATOM | 405 | CG2  | ILE | 53 | 13.696 | 74.795 | 24.912 |
| ATOM | 406 | HG21 | ILE | 53 | 13.720 | 75.286 | 23.939 |
| ATOM | 407 | HG22 | ILE | 53 | 13.054 | 73.916 | 24.859 |
| ATOM | 408 | HG23 | ILE | 53 | 13.304 | 75.486 | 25.658 |
| ATOM | 409 | CG1  | ILE | 53 | 15.676 | 73.334 | 24.336 |
| ATOM | 410 | HG12 | ILE | 53 | 15.591 | 73.746 | 23.330 |
| ATOM | 411 | HG13 | ILE | 53 | 16.729 | 73.204 | 24.587 |
| ATOM | 412 | CD1  | ILE | 53 | 14.975 | 71.995 | 24.393 |
| ATOM | 413 | HD11 | ILE | 53 | 13.922 | 72.124 | 24.142 |
| ATOM | 414 | HD12 | ILE | 53 | 15.437 | 71.312 | 23.680 |
| ATOM | 415 | HD13 | ILE | 53 | 15.060 | 71.582 | 25.398 |
| ATOM | 416 | C    | ILE | 53 | 15.381 | 76.712 | 26.152 |
| ATOM | 417 | O    | ILE | 53 | 14.787 | 77.619 | 25.572 |
| ATOM | 418 | N    | TYR | 54 | 15.470 | 76.661 | 27.492 |
| ATOM | 419 | H    | TYR | 54 | 15.917 | 75.966 | 27.848 |
| ATOM | 420 | CA   | TYR | 54 | 14.888 | 77.656 | 28.349 |
| ATOM | 421 | HA   | TYR | 54 | 13.834 | 77.785 | 28.103 |
| ATOM | 422 | CB   | TYR | 54 | 14.999 | 77.232 | 29.815 |
| ATOM | 423 | HB2  | TYR | 54 | 14.486 | 76.275 | 29.913 |
| ATOM | 424 | HB3  | TYR | 54 | 16.058 | 77.100 | 30.035 |
| ATOM | 425 | CG   | TYR | 54 | 14.403 | 78.225 | 30.787 |
| ATOM | 426 | CD1  | TYR | 54 | 13.030 | 78.294 | 30.982 |
| ATOM | 427 | HD1  | TYR | 54 | 12.386 | 77.618 | 30.420 |
| ATOM | 428 | CE1  | TYR | 54 | 12.477 | 79.198 | 31.868 |
| ATOM | 429 | HE1  | TYR | 54 | 11.397 | 79.240 | 32.011 |
| ATOM | 430 | CZ   | TYR | 54 | 13.299 | 80.050 | 32.573 |
| ATOM | 431 | OH   | TYR | 54 | 12.751 | 80.952 | 33.456 |
| ATOM | 432 | HH   | TYR | 54 | 11.925 | 80.868 | 33.458 |
| ATOM | 433 | CE2  | TYR | 54 | 14.682 | 80.003 | 32.396 |
| ATOM | 434 | HE2  | TYR | 54 | 15.339 | 80.674 | 32.950 |
| ATOM | 435 | CD2  | TYR | 54 | 15.217 | 79.092 | 31.506 |
| ATOM | 436 | HD2  | TYR | 54 | 16.296 | 79.044 | 31.358 |
| ATOM | 437 | C    | TYR | 54 | 15.577 | 78.961 | 28.106 |
| ATOM | 438 | O    | TYR | 54 | 14.952 | 80.020 | 28.096 |
| ATOM | 439 | N    | LEU | 55 | 16.904 | 78.902 | 27.910 |
| ATOM | 440 | H    | LEU | 55 | 17.254 | 78.074 | 27.875 |
| ATOM | 441 | CA   | LEU | 55 | 17.752 | 80.044 | 27.761 |
| ATOM | 442 | HA   | LEU | 55 | 17.634 | 80.706 | 28.619 |
| ATOM | 443 | CB   | LEU | 55 | 19.218 | 79.615 | 27.672 |
| ATOM | 444 | HB2  | LEU | 55 | 19.219 | 78.843 | 26.902 |
| ATOM | 445 | HB3  | LEU | 55 | 19.800 | 80.470 | 27.329 |
| ATOM | 446 | CG   | LEU | 55 | 19.840 | 79.057 | 28.954 |
| ATOM | 447 | HG   | LEU | 55 | 19.194 | 78.272 | 29.347 |
| ATOM | 448 | CD1  | LEU | 55 | 21.221 | 78.485 | 28.677 |
| ATOM | 449 | HD11 | LEU | 55 | 21.868 | 79.270 | 28.285 |
| ATOM | 450 | HD12 | LEU | 55 | 21.645 | 78.094 | 29.602 |
| ATOM | 451 | HD13 | LEU | 55 | 21.142 | 77.681 | 27.946 |
| ATOM | 452 | CD2  | LEU | 55 | 19.918 | 80.133 | 30.026 |



|      |     |      |     |    |        |        |        |
|------|-----|------|-----|----|--------|--------|--------|
| ATOM | 453 | HD21 | LEU | 55 | 18.915 | 80.496 | 30.250 |
| ATOM | 454 | HD22 | LEU | 55 | 20.363 | 79.715 | 30.929 |
| ATOM | 455 | HD23 | LEU | 55 | 20.532 | 80.960 | 29.668 |
| ATOM | 456 | C    | LEU | 55 | 17.299 | 80.774 | 26.529 |
| ATOM | 457 | O    | LEU | 55 | 17.147 | 81.995 | 26.537 |
| ATOM | 458 | N    | VAL | 56 | 17.066 | 80.029 | 25.429 |
| ATOM | 459 | H    | VAL | 56 | 17.149 | 79.135 | 25.490 |
| ATOM | 460 | CA   | VAL | 56 | 16.693 | 80.633 | 24.179 |
| ATOM | 461 | HA   | VAL | 56 | 17.345 | 81.470 | 23.928 |
| ATOM | 462 | CB   | VAL | 56 | 16.733 | 79.614 | 23.025 |
| ATOM | 463 | HB   | VAL | 56 | 16.142 | 78.741 | 23.302 |
| ATOM | 464 | CG1  | VAL | 56 | 16.167 | 80.226 | 21.753 |
| ATOM | 465 | HG11 | VAL | 56 | 16.758 | 81.099 | 21.475 |
| ATOM | 466 | HG12 | VAL | 56 | 16.203 | 79.492 | 20.948 |
| ATOM | 467 | HG13 | VAL | 56 | 15.133 | 80.527 | 21.923 |
| ATOM | 468 | CG2  | VAL | 56 | 18.154 | 79.122 | 22.798 |
| ATOM | 469 | HG21 | VAL | 56 | 18.523 | 78.644 | 23.705 |
| ATOM | 470 | HG22 | VAL | 56 | 18.164 | 78.403 | 21.979 |
| ATOM | 471 | HG23 | VAL | 56 | 18.796 | 79.967 | 22.547 |
| ATOM | 472 | C    | VAL | 56 | 15.329 | 81.252 | 24.259 |
| ATOM | 473 | O    | VAL | 56 | 15.113 | 82.351 | 23.752 |
| ATOM | 474 | N    | SER | 57 | 14.363 | 80.556 | 24.889 |
| ATOM | 475 | H    | SER | 57 | 14.579 | 79.773 | 25.276 |
| ATOM | 476 | CA   | SER | 57 | 13.011 | 81.040 | 24.951 |
| ATOM | 477 | HA   | SER | 57 | 12.682 | 81.344 | 23.957 |
| ATOM | 478 | CB   | SER | 57 | 12.073 | 79.945 | 25.463 |
| ATOM | 479 | HB2  | SER | 57 | 11.046 | 80.304 | 25.393 |
| ATOM | 480 | HB3  | SER | 57 | 12.192 | 79.062 | 24.836 |
| ATOM | 481 | OG   | SER | 57 | 12.365 | 79.611 | 26.809 |
| ATOM | 482 | HG   | SER | 57 | 13.147 | 79.338 | 26.862 |
| ATOM | 483 | C    | SER | 57 | 12.916 | 82.254 | 25.827 |
| ATOM | 484 | O    | SER | 57 | 12.101 | 83.142 | 25.584 |
| ATOM | 485 | N    | SER | 58 | 13.733 | 82.297 | 26.894 |
| ATOM | 486 | H    | SER | 58 | 14.331 | 81.628 | 26.964 |
| ATOM | 487 | CA   | SER | 58 | 13.691 | 83.330 | 27.891 |
| ATOM | 488 | HA   | SER | 58 | 12.655 | 83.558 | 28.143 |
| ATOM | 489 | CB   | SER | 58 | 14.415 | 82.879 | 29.161 |
| ATOM | 490 | HB2  | SER | 58 | 15.428 | 82.575 | 28.896 |
| ATOM | 491 | HB3  | SER | 58 | 14.458 | 83.718 | 29.855 |
| ATOM | 492 | OG   | SER | 58 | 13.741 | 81.794 | 29.774 |
| ATOM | 493 | HG   | SER | 58 | 13.708 | 81.155 | 29.245 |
| ATOM | 494 | C    | SER | 58 | 14.282 | 84.641 | 27.451 |
| ATOM | 495 | O    | SER | 58 | 13.897 | 85.676 | 27.990 |
| ATOM | 496 | N    | PHE | 59 | 15.225 | 84.677 | 26.486 |
| ATOM | 497 | H    | PHE | 59 | 15.471 | 83.968 | 25.990 |
| ATOM | 498 | CA   | PHE | 59 | 15.851 | 85.956 | 26.273 |
| ATOM | 499 | HA   | PHE | 59 | 15.346 | 86.718 | 26.867 |
| ATOM | 500 | CB   | PHE | 59 | 17.323 | 85.908 | 26.688 |
| ATOM | 501 | HB2  | PHE | 59 | 17.834 | 85.102 | 26.162 |
| ATOM | 502 | HB3  | PHE | 59 | 17.809 | 86.856 | 26.458 |
| ATOM | 503 | CG   | PHE | 59 | 17.531 | 85.663 | 28.156 |
| ATOM | 504 | CD1  | PHE | 59 | 17.572 | 84.375 | 28.658 |

|      |     |      |     |    |        |        |        |
|------|-----|------|-----|----|--------|--------|--------|
| ATOM | 505 | HD1  | PHE | 59 | 17.452 | 83.533 | 27.977 |
| ATOM | 506 | CE1  | PHE | 59 | 17.763 | 84.150 | 30.008 |
| ATOM | 507 | HE1  | PHE | 59 | 17.793 | 83.130 | 30.391 |
| ATOM | 508 | CZ   | PHE | 59 | 17.916 | 85.218 | 30.872 |
| ATOM | 509 | HZ   | PHE | 59 | 18.068 | 85.046 | 31.938 |
| ATOM | 510 | CE2  | PHE | 59 | 17.876 | 86.497 | 30.384 |
| ATOM | 511 | HE2  | PHE | 59 | 17.995 | 87.339 | 31.065 |
| ATOM | 512 | CD2  | PHE | 59 | 17.685 | 86.722 | 29.033 |
| ATOM | 513 | HD2  | PHE | 59 | 17.655 | 87.742 | 28.649 |
| ATOM | 514 | C    | PHE | 59 | 15.737 | 86.389 | 24.838 |
| ATOM | 515 | O    | PHE | 59 | 15.687 | 85.572 | 23.919 |
| ATOM | 516 | N    | ARG | 60 | 15.673 | 87.725 | 24.633 |
| ATOM | 517 | H    | ARG | 60 | 15.734 | 88.223 | 25.380 |
| ATOM | 518 | CA   | ARG | 60 | 15.521 | 88.364 | 23.352 |
| ATOM | 519 | HA   | ARG | 60 | 14.687 | 87.915 | 22.812 |
| ATOM | 520 | CB   | ARG | 60 | 15.242 | 89.858 | 23.528 |
| ATOM | 521 | HB2  | ARG | 60 | 16.012 | 90.253 | 24.191 |
| ATOM | 522 | HB3  | ARG | 60 | 15.337 | 90.321 | 22.546 |
| ATOM | 523 | CG   | ARG | 60 | 13.870 | 90.169 | 24.104 |
| ATOM | 524 | HG2  | ARG | 60 | 13.112 | 89.796 | 23.416 |
| ATOM | 525 | HG3  | ARG | 60 | 13.772 | 89.659 | 25.062 |
| ATOM | 526 | CD   | ARG | 60 | 13.681 | 91.664 | 24.304 |
| ATOM | 527 | HD2  | ARG | 60 | 14.436 | 92.028 | 25.001 |
| ATOM | 528 | HD3  | ARG | 60 | 13.800 | 92.167 | 23.344 |
| ATOM | 529 | NE   | ARG | 60 | 12.359 | 91.982 | 24.838 |
| ATOM | 530 | HE   | ARG | 60 | 11.795 | 91.334 | 24.902 |
| ATOM | 531 | CZ   | ARG | 60 | 11.981 | 93.196 | 25.224 |
| ATOM | 532 | NH1  | ARG | 60 | 10.758 | 93.391 | 25.697 |
| ATOM | 533 | HH11 | ARG | 60 | 10.209 | 92.732 | 25.754 |
| ATOM | 534 | HH12 | ARG | 60 | 10.514 | 94.177 | 25.947 |
| ATOM | 535 | NH2  | ARG | 60 | 12.828 | 94.213 | 25.137 |
| ATOM | 536 | HH21 | ARG | 60 | 13.622 | 94.086 | 24.830 |
| ATOM | 537 | HH22 | ARG | 60 | 12.584 | 94.999 | 25.387 |
| ATOM | 538 | C    | ARG | 60 | 16.734 | 88.177 | 22.480 |
| ATOM | 539 | O    | ARG | 60 | 16.603 | 87.931 | 21.283 |
| ATOM | 540 | N    | LYS | 61 | 17.946 | 88.284 | 23.060 |
| ATOM | 541 | H    | LYS | 61 | 17.958 | 88.395 | 23.953 |
| ATOM | 542 | CA   | LYS | 61 | 19.184 | 88.228 | 22.324 |
| ATOM | 543 | HA   | LYS | 61 | 19.179 | 88.981 | 21.536 |
| ATOM | 544 | CB   | LYS | 61 | 20.371 | 88.498 | 23.251 |
| ATOM | 545 | HB2  | LYS | 61 | 20.264 | 87.836 | 24.111 |
| ATOM | 546 | HB3  | LYS | 61 | 21.274 | 88.235 | 22.701 |
| ATOM | 547 | CG   | LYS | 61 | 20.471 | 89.937 | 23.729 |
| ATOM | 548 | HG2  | LYS | 61 | 20.583 | 90.585 | 22.859 |
| ATOM | 549 | HG3  | LYS | 61 | 19.552 | 90.192 | 24.256 |
| ATOM | 550 | CD   | LYS | 61 | 21.658 | 90.129 | 24.659 |
| ATOM | 551 | HD2  | LYS | 61 | 21.542 | 89.462 | 25.513 |
| ATOM | 552 | HD3  | LYS | 61 | 22.569 | 89.871 | 24.118 |
| ATOM | 553 | CE   | LYS | 61 | 21.749 | 91.566 | 25.148 |
| ATOM | 554 | HE2  | LYS | 61 | 20.813 | 91.817 | 25.647 |
| ATOM | 555 | HE3  | LYS | 61 | 21.720 | 90.526 | 24.823 |
| ATOM | 556 | NZ   | LYS | 61 | 22.882 | 91.759 | 26.094 |

|      |     |      |     |    |        |        |        |
|------|-----|------|-----|----|--------|--------|--------|
| ATOM | 557 | HZ1  | LYS | 61 | 22.906 | 92.608 | 26.360 |
| ATOM | 558 | HZ2  | LYS | 61 | 23.647 | 91.555 | 25.687 |
| ATOM | 559 | HZ3  | LYS | 61 | 22.772 | 91.230 | 26.802 |
| ATOM | 560 | C    | LYS | 61 | 19.330 | 86.893 | 21.656 |
| ATOM | 561 | O    | LYS | 61 | 19.854 | 86.801 | 20.548 |
| ATOM | 562 | N    | LEU | 62 | 18.879 | 85.832 | 22.344 |
| ATOM | 563 | H    | LEU | 62 | 18.515 | 86.072 | 23.131 |
| ATOM | 564 | CA   | LEU | 62 | 18.922 | 84.443 | 21.964 |
| ATOM | 565 | HA   | LEU | 62 | 19.915 | 84.193 | 21.589 |
| ATOM | 566 | CB   | LEU | 62 | 18.614 | 83.549 | 23.167 |
| ATOM | 567 | HB2  | LEU | 62 | 17.865 | 84.110 | 23.726 |
| ATOM | 568 | HB3  | LEU | 62 | 18.172 | 82.624 | 22.795 |
| ATOM | 569 | CG   | LEU | 62 | 19.792 | 83.218 | 24.085 |
| ATOM | 570 | HG   | LEU | 62 | 19.422 | 82.663 | 24.947 |
| ATOM | 571 | CD1  | LEU | 62 | 20.828 | 82.381 | 23.350 |
| ATOM | 572 | HD11 | LEU | 62 | 21.199 | 82.936 | 22.488 |
| ATOM | 573 | HD12 | LEU | 62 | 21.657 | 82.157 | 24.021 |
| ATOM | 574 | HD13 | LEU | 62 | 20.372 | 81.450 | 23.014 |
| ATOM | 575 | CD2  | LEU | 62 | 20.427 | 84.490 | 24.625 |
| ATOM | 576 | HD21 | LEU | 62 | 19.686 | 85.054 | 25.192 |
| ATOM | 577 | HD22 | LEU | 62 | 21.263 | 84.232 | 25.275 |
| ATOM | 578 | HD23 | LEU | 62 | 20.788 | 85.097 | 23.795 |
| ATOM | 579 | C    | LEU | 62 | 17.964 | 84.125 | 20.845 |
| ATOM | 580 | O    | LEU | 62 | 17.945 | 83.006 | 20.341 |
| ATOM | 581 | N    | GLN | 63 | 17.113 | 85.092 | 20.473 |
| ATOM | 582 | H    | GLN | 63 | 17.303 | 85.869 | 20.885 |
| ATOM | 583 | CA   | GLN | 63 | 16.009 | 85.018 | 19.550 |
| ATOM | 584 | HA   | GLN | 63 | 15.291 | 84.273 | 19.892 |
| ATOM | 585 | CB   | GLN | 63 | 15.301 | 86.371 | 19.452 |
| ATOM | 586 | HB2  | GLN | 63 | 15.038 | 86.671 | 20.467 |
| ATOM | 587 | HB3  | GLN | 63 | 16.018 | 87.080 | 19.039 |
| ATOM | 588 | CG   | GLN | 63 | 14.050 | 86.355 | 18.589 |
| ATOM | 589 | HG2  | GLN | 63 | 13.669 | 87.373 | 18.506 |
| ATOM | 590 | HG3  | GLN | 63 | 14.313 | 85.984 | 17.598 |
| ATOM | 591 | CD   | GLN | 63 | 12.957 | 85.474 | 19.162 |
| ATOM | 592 | OE1  | GLN | 63 | 12.602 | 85.593 | 20.334 |
| ATOM | 593 | NE2  | GLN | 63 | 12.421 | 84.586 | 18.334 |
| ATOM | 594 | HE21 | GLN | 63 | 11.768 | 84.038 | 18.623 |
| ATOM | 595 | HE22 | GLN | 63 | 12.710 | 84.531 | 17.483 |
| ATOM | 596 | C    | GLN | 63 | 16.399 | 84.580 | 18.159 |
| ATOM | 597 | O    | GLN | 63 | 15.513 | 84.317 | 17.349 |
| ATOM | 598 | N    | THR | 64 | 17.703 | 84.581 | 17.821 |
| ATOM | 599 | H    | THR | 64 | 18.245 | 84.792 | 18.508 |
| ATOM | 600 | CA   | THR | 64 | 18.264 | 84.288 | 16.521 |
| ATOM | 601 | HA   | THR | 64 | 18.036 | 85.108 | 15.841 |
| ATOM | 602 | CB   | THR | 64 | 19.793 | 84.118 | 16.591 |
| ATOM | 603 | HB   | THR | 64 | 20.028 | 83.297 | 17.268 |
| ATOM | 604 | CG2  | THR | 64 | 20.359 | 83.815 | 15.213 |
| ATOM | 605 | HG21 | THR | 64 | 20.125 | 84.636 | 14.535 |
| ATOM | 606 | HG22 | THR | 64 | 21.441 | 83.698 | 15.282 |
| ATOM | 607 | HG23 | THR | 64 | 19.918 | 82.894 | 14.833 |
| ATOM | 608 | OG1  | THR | 64 | 20.390 | 85.327 | 17.077 |

|      |     |      |     |    |        |        |        |
|------|-----|------|-----|----|--------|--------|--------|
| ATOM | 609 | HG1  | THR | 64 | 21.213 | 85.232 | 17.114 |
| ATOM | 610 | C    | THR | 64 | 17.684 | 83.049 | 15.880 |
| ATOM | 611 | O    | THR | 64 | 17.183 | 82.139 | 16.539 |
| ATOM | 612 | N    | THR | 65 | 17.737 | 83.025 | 14.526 |
| ATOM | 613 | H    | THR | 65 | 18.098 | 83.763 | 14.159 |
| ATOM | 614 | CA   | THR | 65 | 17.279 | 81.955 | 13.684 |
| ATOM | 615 | HA   | THR | 65 | 16.258 | 81.695 | 13.963 |
| ATOM | 616 | CB   | THR | 65 | 17.296 | 82.359 | 12.198 |
| ATOM | 617 | HB   | THR | 65 | 16.951 | 81.517 | 11.598 |
| ATOM | 618 | CG2  | THR | 65 | 16.388 | 83.556 | 11.961 |
| ATOM | 619 | HG21 | THR | 65 | 16.733 | 84.398 | 12.561 |
| ATOM | 620 | HG22 | THR | 65 | 16.412 | 83.828 | 10.906 |
| ATOM | 621 | HG23 | THR | 65 | 15.368 | 83.301 | 12.247 |
| ATOM | 622 | OG1  | THR | 65 | 18.630 | 82.712 | 11.811 |
| ATOM | 623 | HG1  | THR | 65 | 19.132 | 82.061 | 11.926 |
| ATOM | 624 | C    | THR | 65 | 18.133 | 80.744 | 13.900 |
| ATOM | 625 | O    | THR | 65 | 17.632 | 79.621 | 13.936 |
| ATOM | 626 | N    | SER | 66 | 19.458 | 80.936 | 14.044 |
| ATOM | 627 | H    | SER | 66 | 19.798 | 81.769 | 14.033 |
| ATOM | 628 | CA   | SER | 66 | 20.326 | 79.811 | 14.215 |
| ATOM | 629 | HA   | SER | 66 | 20.181 | 79.105 | 13.397 |
| ATOM | 630 | CB   | SER | 66 | 21.789 | 80.259 | 14.221 |
| ATOM | 631 | HB2  | SER | 66 | 22.005 | 80.758 | 13.276 |
| ATOM | 632 | HB3  | SER | 66 | 21.936 | 80.959 | 15.043 |
| ATOM | 633 | OG   | SER | 66 | 22.660 | 79.153 | 14.381 |
| ATOM | 634 | HG   | SER | 66 | 23.447 | 79.419 | 14.381 |
| ATOM | 635 | C    | SER | 66 | 19.978 | 79.102 | 15.485 |
| ATOM | 636 | O    | SER | 66 | 20.004 | 77.874 | 15.535 |
| ATOM | 637 | N    | ASN | 67 | 19.588 | 79.851 | 16.531 |
| ATOM | 638 | H    | ASN | 67 | 19.533 | 80.741 | 16.412 |
| ATOM | 639 | CA   | ASN | 67 | 19.264 | 79.276 | 17.807 |
| ATOM | 640 | HA   | ASN | 67 | 20.088 | 78.651 | 18.150 |
| ATOM | 641 | CB   | ASN | 67 | 19.020 | 80.375 | 18.843 |
| ATOM | 642 | HB2  | ASN | 67 | 18.360 | 81.126 | 18.408 |
| ATOM | 643 | HB3  | ASN | 67 | 18.541 | 79.933 | 19.717 |
| ATOM | 644 | CG   | ASN | 67 | 20.302 | 81.054 | 19.285 |
| ATOM | 645 | OD1  | ASN | 67 | 21.309 | 80.394 | 19.539 |
| ATOM | 646 | ND2  | ASN | 67 | 20.266 | 82.378 | 19.378 |
| ATOM | 647 | HD21 | ASN | 67 | 21.000 | 82.831 | 19.636 |
| ATOM | 648 | HD22 | ASN | 67 | 19.509 | 82.823 | 19.183 |
| ATOM | 649 | C    | ASN | 67 | 18.073 | 78.381 | 17.672 |
| ATOM | 650 | O    | ASN | 67 | 17.915 | 77.446 | 18.454 |
| ATOM | 651 | N    | ALA | 68 | 17.176 | 78.675 | 16.711 |
| ATOM | 652 | H    | ALA | 68 | 17.301 | 79.418 | 16.219 |
| ATOM | 653 | CA   | ALA | 68 | 16.039 | 77.832 | 16.463 |
| ATOM | 654 | HA   | ALA | 68 | 15.466 | 77.652 | 17.373 |
| ATOM | 655 | CB   | ALA | 68 | 15.123 | 78.468 | 15.429 |
| ATOM | 656 | HB1  | ALA | 68 | 15.680 | 78.646 | 14.509 |
| ATOM | 657 | HB2  | ALA | 68 | 14.287 | 77.800 | 15.223 |
| ATOM | 658 | HB3  | ALA | 68 | 14.744 | 79.415 | 15.812 |
| ATOM | 659 | C    | ALA | 68 | 16.557 | 76.500 | 16.013 |
| ATOM | 660 | O    | ALA | 68 | 16.010 | 75.459 | 16.371 |

|      |     |      |     |    |        |        |        |
|------|-----|------|-----|----|--------|--------|--------|
| ATOM | 661 | N    | PHE | 69 | 17.623 | 76.509 | 15.185 |
| ATOM | 662 | H    | PHE | 69 | 17.944 | 77.311 | 14.933 |
| ATOM | 663 | CA   | PHE | 69 | 18.243 | 75.306 | 14.708 |
| ATOM | 664 | HA   | PHE | 69 | 17.488 | 74.645 | 14.284 |
| ATOM | 665 | CB   | PHE | 69 | 19.275 | 75.628 | 13.625 |
| ATOM | 666 | HB2  | PHE | 69 | 19.903 | 76.461 | 13.943 |
| ATOM | 667 | HB3  | PHE | 69 | 19.900 | 74.756 | 13.430 |
| ATOM | 668 | CG   | PHE | 69 | 18.669 | 76.025 | 12.309 |
| ATOM | 669 | CD1  | PHE | 69 | 18.663 | 77.349 | 11.905 |
| ATOM | 670 | HD1  | PHE | 69 | 19.104 | 78.107 | 12.553 |
| ATOM | 671 | CE1  | PHE | 69 | 18.106 | 77.714 | 10.694 |
| ATOM | 672 | HE1  | PHE | 69 | 18.109 | 78.760 | 10.386 |
| ATOM | 673 | CZ   | PHE | 69 | 17.545 | 76.754 | 9.874  |
| ATOM | 674 | HZ   | PHE | 69 | 17.103 | 77.037 | 8.919  |
| ATOM | 675 | CE2  | PHE | 69 | 17.546 | 75.441 | 10.266 |
| ATOM | 676 | HE2  | PHE | 69 | 17.105 | 74.683 | 9.619  |
| ATOM | 677 | CD2  | PHE | 69 | 18.104 | 75.076 | 11.477 |
| ATOM | 678 | HD2  | PHE | 69 | 18.102 | 74.030 | 11.785 |
| ATOM | 679 | C    | PHE | 69 | 18.875 | 74.593 | 15.868 |
| ATOM | 680 | O    | PHE | 69 | 18.837 | 73.366 | 15.941 |
| ATOM | 681 | N    | ILE | 70 | 19.484 | 75.351 | 16.804 |
| ATOM | 682 | H    | ILE | 70 | 19.512 | 76.241 | 16.676 |
| ATOM | 683 | CA   | ILE | 70 | 20.078 | 74.774 | 17.981 |
| ATOM | 684 | HA   | ILE | 70 | 20.794 | 73.991 | 17.732 |
| ATOM | 685 | CB   | ILE | 70 | 20.768 | 75.844 | 18.847 |
| ATOM | 686 | HB   | ILE | 70 | 20.094 | 76.692 | 18.967 |
| ATOM | 687 | CG2  | ILE | 70 | 21.118 | 75.278 | 20.215 |
| ATOM | 688 | HG21 | ILE | 70 | 21.793 | 74.430 | 20.096 |
| ATOM | 689 | HG22 | ILE | 70 | 21.605 | 76.048 | 20.814 |
| ATOM | 690 | HG23 | ILE | 70 | 20.208 | 74.950 | 20.717 |
| ATOM | 691 | CG1  | ILE | 70 | 21.999 | 76.399 | 18.129 |
| ATOM | 692 | HG12 | ILE | 70 | 22.753 | 75.612 | 18.124 |
| ATOM | 693 | HG13 | ILE | 70 | 21.702 | 76.624 | 17.105 |
| ATOM | 694 | CD1  | ILE | 70 | 22.573 | 77.643 | 18.772 |
| ATOM | 695 | HD11 | ILE | 70 | 22.870 | 77.419 | 19.796 |
| ATOM | 696 | HD12 | ILE | 70 | 23.443 | 77.977 | 18.206 |
| ATOM | 697 | HD13 | ILE | 70 | 21.820 | 78.431 | 18.777 |
| ATOM | 698 | C    | ILE | 70 | 19.019 | 74.054 | 18.759 |
| ATOM | 699 | O    | ILE | 70 | 19.282 | 73.005 | 19.343 |
| ATOM | 700 | N    | VAL | 71 | 17.790 | 74.601 | 18.791 |
| ATOM | 701 | H    | VAL | 71 | 17.654 | 75.360 | 18.327 |
| ATOM | 702 | CA   | VAL | 71 | 16.712 | 74.011 | 19.536 |
| ATOM | 703 | HA   | VAL | 71 | 16.975 | 73.879 | 20.585 |
| ATOM | 704 | CB   | VAL | 71 | 15.434 | 74.866 | 19.453 |
| ATOM | 705 | HB   | VAL | 71 | 15.221 | 75.085 | 18.407 |
| ATOM | 706 | CG1  | VAL | 71 | 14.256 | 74.124 | 20.065 |
| ATOM | 707 | HG11 | VAL | 71 | 14.468 | 73.905 | 21.112 |
| ATOM | 708 | HG12 | VAL | 71 | 13.361 | 74.743 | 19.998 |
| ATOM | 709 | HG13 | VAL | 71 | 14.093 | 73.191 | 19.525 |
| ATOM | 710 | CG2  | VAL | 71 | 15.643 | 76.205 | 20.144 |
| ATOM | 711 | HG21 | VAL | 71 | 16.459 | 76.741 | 19.660 |
| ATOM | 712 | HG22 | VAL | 71 | 14.730 | 76.796 | 20.076 |

|      |     |      |     |    |        |        |        |
|------|-----|------|-----|----|--------|--------|--------|
| ATOM | 713 | HG23 | VAL | 71 | 15.890 | 76.039 | 21.193 |
| ATOM | 714 | C    | VAL | 71 | 16.455 | 72.621 | 19.027 |
| ATOM | 715 | O    | VAL | 71 | 16.129 | 71.722 | 19.799 |
| ATOM | 716 | N    | ASN | 72 | 16.573 | 72.401 | 17.706 |
| ATOM | 717 | H    | ASN | 72 | 16.814 | 73.084 | 17.172 |
| ATOM | 718 | CA   | ASN | 72 | 16.322 | 71.102 | 17.143 |
| ATOM | 719 | HA   | ASN | 72 | 15.327 | 70.762 | 17.429 |
| ATOM | 720 | CB   | ASN | 72 | 16.401 | 71.155 | 15.616 |
| ATOM | 721 | HB2  | ASN | 72 | 15.735 | 71.940 | 15.257 |
| ATOM | 722 | HB3  | ASN | 72 | 17.426 | 71.388 | 15.327 |
| ATOM | 723 | CG   | ASN | 72 | 16.000 | 69.846 | 14.966 |
| ATOM | 724 | OD1  | ASN | 72 | 14.858 | 69.404 | 15.091 |
| ATOM | 725 | ND2  | ASN | 72 | 16.941 | 69.221 | 14.267 |
| ATOM | 726 | HD21 | ASN | 72 | 16.755 | 68.440 | 13.861 |
| ATOM | 727 | HD22 | ASN | 72 | 17.764 | 69.578 | 14.201 |
| ATOM | 728 | C    | ASN | 72 | 17.304 | 70.126 | 17.719 |
| ATOM | 729 | O    | ASN | 72 | 16.937 | 69.010 | 18.087 |
| ATOM | 730 | N    | GLY | 73 | 18.588 | 70.520 | 17.804 |
| ATOM | 731 | H    | GLY | 73 | 18.810 | 71.345 | 17.522 |
| ATOM | 732 | CA   | GLY | 73 | 19.595 | 69.649 | 18.333 |
| ATOM | 733 | HA2  | GLY | 73 | 19.605 | 68.708 | 17.783 |
| ATOM | 734 | HA3  | GLY | 73 | 20.575 | 70.121 | 18.264 |
| ATOM | 735 | C    | GLY | 73 | 19.290 | 69.370 | 19.770 |
| ATOM | 736 | O    | GLY | 73 | 19.426 | 68.236 | 20.228 |
| ATOM | 737 | N    | CYS | 74 | 18.861 | 70.404 | 20.523 |
| ATOM | 738 | H    | CYS | 74 | 18.729 | 71.209 | 20.143 |
| ATOM | 739 | CA   | CYS | 74 | 18.615 | 70.224 | 21.926 |
| ATOM | 740 | HA   | CYS | 74 | 19.496 | 69.794 | 22.403 |
| ATOM | 741 | CB   | CYS | 74 | 18.305 | 71.566 | 22.592 |
| ATOM | 742 | HB2  | CYS | 74 | 17.544 | 72.103 | 22.025 |
| ATOM | 743 | HB3  | CYS | 74 | 17.954 | 71.410 | 23.612 |
| ATOM | 744 | SG   | CYS | 74 | 19.721 | 72.684 | 22.714 |
| ATOM | 745 | HG   | CYS | 74 | 19.066 | 73.673 | 23.315 |
| ATOM | 746 | C    | CYS | 74 | 17.486 | 69.258 | 22.087 |
| ATOM | 747 | O    | CYS | 74 | 17.468 | 68.477 | 23.036 |
| ATOM | 748 | N    | ALA | 75 | 16.498 | 69.306 | 21.172 |
| ATOM | 749 | H    | ALA | 75 | 16.553 | 69.914 | 20.511 |
| ATOM | 750 | CA   | ALA | 75 | 15.375 | 68.413 | 21.235 |
| ATOM | 751 | HA   | ALA | 75 | 14.906 | 68.464 | 22.218 |
| ATOM | 752 | CB   | ALA | 75 | 14.342 | 68.786 | 20.183 |
| ATOM | 753 | HB1  | ALA | 75 | 14.794 | 68.730 | 19.193 |
| ATOM | 754 | HB2  | ALA | 75 | 13.501 | 68.094 | 20.237 |
| ATOM | 755 | HB3  | ALA | 75 | 13.989 | 69.801 | 20.364 |
| ATOM | 756 | C    | ALA | 75 | 15.852 | 67.003 | 21.048 |
| ATOM | 757 | O    | ALA | 75 | 15.412 | 66.096 | 21.751 |
| ATOM | 758 | N    | ALA | 76 | 16.771 | 66.785 | 20.086 |
| ATOM | 759 | H    | ALA | 76 | 17.071 | 67.490 | 19.614 |
| ATOM | 760 | CA   | ALA | 76 | 17.272 | 65.467 | 19.805 |
| ATOM | 761 | HA   | ALA | 76 | 16.450 | 64.777 | 19.617 |
| ATOM | 762 | CB   | ALA | 76 | 18.175 | 65.493 | 18.581 |
| ATOM | 763 | HB1  | ALA | 76 | 19.008 | 66.173 | 18.758 |
| ATOM | 764 | HB2  | ALA | 76 | 18.559 | 64.491 | 18.391 |

|      |     |      |     |    |        |        |        |
|------|-----|------|-----|----|--------|--------|--------|
| ATOM | 765 | HB3  | ALA | 76 | 17.606 | 65.834 | 17.716 |
| ATOM | 766 | C    | ALA | 76 | 18.002 | 64.959 | 21.009 |
| ATOM | 767 | O    | ALA | 76 | 17.876 | 63.793 | 21.376 |
| ATOM | 768 | N    | ASP | 77 | 18.794 | 65.833 | 21.656 |
| ATOM | 769 | H    | ASP | 77 | 18.835 | 66.676 | 21.343 |
| ATOM | 770 | CA   | ASP | 77 | 19.560 | 65.458 | 22.812 |
| ATOM | 771 | HA   | ASP | 77 | 20.153 | 64.571 | 22.590 |
| ATOM | 772 | CB   | ASP | 77 | 20.506 | 66.590 | 23.218 |
| ATOM | 773 | HB2  | ASP | 77 | 19.916 | 67.502 | 23.310 |
| ATOM | 774 | HB3  | ASP | 77 | 20.937 | 66.337 | 24.187 |
| ATOM | 775 | CG   | ASP | 77 | 21.619 | 66.808 | 22.212 |
| ATOM | 776 | OD1  | ASP | 77 | 22.502 | 65.932 | 22.103 |
| ATOM | 777 | OD2  | ASP | 77 | 21.608 | 67.856 | 21.533 |
| ATOM | 778 | C    | ASP | 77 | 18.619 | 65.110 | 23.925 |
| ATOM | 779 | O    | ASP | 77 | 18.882 | 64.203 | 24.714 |
| ATOM | 780 | N    | LEU | 78 | 17.497 | 65.847 | 24.025 |
| ATOM | 781 | H    | LEU | 78 | 17.367 | 66.486 | 23.405 |
| ATOM | 782 | CA   | LEU | 78 | 16.528 | 65.648 | 25.065 |
| ATOM | 783 | HA   | LEU | 78 | 17.020 | 65.669 | 26.037 |
| ATOM | 784 | CB   | LEU | 78 | 15.469 | 66.752 | 25.029 |
| ATOM | 785 | HB2  | LEU | 78 | 16.045 | 67.670 | 25.144 |
| ATOM | 786 | HB3  | LEU | 78 | 15.000 | 66.738 | 24.045 |
| ATOM | 787 | CG   | LEU | 78 | 14.388 | 66.690 | 26.110 |
| ATOM | 788 | HG   | LEU | 78 | 13.838 | 65.755 | 26.005 |
| ATOM | 789 | CD1  | LEU | 78 | 15.009 | 66.760 | 27.497 |
| ATOM | 790 | HD11 | LEU | 78 | 15.559 | 67.695 | 27.603 |
| ATOM | 791 | HD12 | LEU | 78 | 14.223 | 66.714 | 28.250 |
| ATOM | 792 | HD13 | LEU | 78 | 15.691 | 65.921 | 27.633 |
| ATOM | 793 | CD2  | LEU | 78 | 13.378 | 67.811 | 25.925 |
| ATOM | 794 | HD21 | LEU | 78 | 12.904 | 67.716 | 24.948 |
| ATOM | 795 | HD22 | LEU | 78 | 12.618 | 67.748 | 26.704 |
| ATOM | 796 | HD23 | LEU | 78 | 13.886 | 68.773 | 25.990 |
| ATOM | 797 | C    | LEU | 78 | 15.897 | 64.297 | 24.912 |
| ATOM | 798 | O    | LEU | 78 | 15.687 | 63.592 | 25.898 |
| ATOM | 799 | N    | SER | 79 | 15.573 | 63.896 | 23.666 |
| ATOM | 800 | H    | SER | 79 | 15.765 | 64.436 | 22.972 |
| ATOM | 801 | CA   | SER | 79 | 14.932 | 62.631 | 23.435 |
| ATOM | 802 | HA   | SER | 79 | 14.034 | 62.555 | 24.048 |
| ATOM | 803 | CB   | SER | 79 | 14.533 | 62.493 | 21.964 |
| ATOM | 804 | HB2  | SER | 79 | 13.960 | 61.574 | 21.842 |
| ATOM | 805 | HB3  | SER | 79 | 13.913 | 63.346 | 21.689 |
| ATOM | 806 | OG   | SER | 79 | 15.676 | 62.451 | 21.128 |
| ATOM | 807 | HG   | SER | 79 | 16.112 | 63.152 | 21.221 |
| ATOM | 808 | C    | SER | 79 | 15.869 | 61.544 | 23.854 |
| ATOM | 809 | O    | SER | 79 | 15.450 | 60.531 | 24.412 |
| ATOM | 810 | N    | VAL | 80 | 17.173 | 61.734 | 23.590 |
| ATOM | 811 | H    | VAL | 80 | 17.425 | 62.497 | 23.186 |
| ATOM | 812 | CA   | VAL | 80 | 18.154 | 60.750 | 23.939 |
| ATOM | 813 | HA   | VAL | 80 | 17.896 | 59.769 | 23.539 |
| ATOM | 814 | CB   | VAL | 80 | 19.552 | 61.139 | 23.423 |
| ATOM | 815 | HB   | VAL | 80 | 19.773 | 62.160 | 23.733 |
| ATOM | 816 | CG1  | VAL | 80 | 20.608 | 60.199 | 23.985 |

|      |     |      |     |    |        |        |        |
|------|-----|------|-----|----|--------|--------|--------|
| ATOM | 817 | HG11 | VAL | 80 | 20.388 | 59.177 | 23.675 |
| ATOM | 818 | HG12 | VAL | 80 | 21.590 | 60.489 | 23.610 |
| ATOM | 819 | HG13 | VAL | 80 | 20.604 | 60.256 | 25.073 |
| ATOM | 820 | CG2  | VAL | 80 | 19.580 | 61.128 | 21.902 |
| ATOM | 821 | HG21 | VAL | 80 | 18.850 | 61.842 | 21.519 |
| ATOM | 822 | HG22 | VAL | 80 | 20.575 | 61.405 | 21.554 |
| ATOM | 823 | HG23 | VAL | 80 | 19.335 | 60.129 | 21.541 |
| ATOM | 824 | C    | VAL | 80 | 18.152 | 60.586 | 25.425 |
| ATOM | 825 | O    | VAL | 80 | 18.160 | 59.469 | 25.940 |
| ATOM | 826 | N    | CYS | 81 | 18.137 | 61.712 | 26.157 |
| ATOM | 827 | H    | CYS | 81 | 18.074 | 62.506 | 25.738 |
| ATOM | 828 | CA   | CYS | 81 | 18.219 | 61.660 | 27.585 |
| ATOM | 829 | HA   | CYS | 81 | 19.092 | 61.080 | 27.884 |
| ATOM | 830 | CB   | CYS | 81 | 18.347 | 63.070 | 28.166 |
| ATOM | 831 | HB2  | CYS | 81 | 17.583 | 63.723 | 27.744 |
| ATOM | 832 | HB3  | CYS | 81 | 18.243 | 63.043 | 29.251 |
| ATOM | 833 | SG   | CYS | 81 | 19.932 | 63.873 | 27.835 |
| ATOM | 834 | HG   | CYS | 81 | 19.649 | 65.006 | 28.471 |
| ATOM | 835 | C    | CYS | 81 | 17.025 | 60.969 | 28.167 |
| ATOM | 836 | O    | CYS | 81 | 17.179 | 60.126 | 29.048 |
| ATOM | 837 | N    | ALA | 82 | 15.799 | 61.360 | 27.759 |
| ATOM | 838 | H    | ALA | 82 | 15.703 | 62.006 | 27.140 |
| ATOM | 839 | CA   | ALA | 82 | 14.638 | 60.731 | 28.327 |
| ATOM | 840 | HA   | ALA | 82 | 14.798 | 60.700 | 29.405 |
| ATOM | 841 | CB   | ALA | 82 | 13.394 | 61.559 | 28.044 |
| ATOM | 842 | HB1  | ALA | 82 | 13.216 | 61.592 | 26.969 |
| ATOM | 843 | HB2  | ALA | 82 | 12.535 | 61.107 | 28.540 |
| ATOM | 844 | HB3  | ALA | 82 | 13.538 | 62.572 | 28.419 |
| ATOM | 845 | C    | ALA | 82 | 14.393 | 59.326 | 27.842 |
| ATOM | 846 | O    | ALA | 82 | 14.280 | 58.402 | 28.644 |
| ATOM | 847 | N    | LEU | 83 | 14.246 | 59.149 | 26.509 |
| ATOM | 848 | H    | LEU | 83 | 14.383 | 59.859 | 25.974 |
| ATOM | 849 | CA   | LEU | 83 | 13.883 | 57.875 | 25.938 |
| ATOM | 850 | HA   | LEU | 83 | 13.171 | 57.368 | 26.589 |
| ATOM | 851 | CB   | LEU | 83 | 13.237 | 58.068 | 24.565 |
| ATOM | 852 | HB2  | LEU | 83 | 13.951 | 58.690 | 24.024 |
| ATOM | 853 | HB3  | LEU | 83 | 13.169 | 57.092 | 24.084 |
| ATOM | 854 | CG   | LEU | 83 | 11.862 | 58.740 | 24.551 |
| ATOM | 855 | HG   | LEU | 83 | 11.921 | 59.677 | 25.105 |
| ATOM | 856 | CD1  | LEU | 83 | 11.417 | 59.023 | 23.124 |
| ATOM | 857 | HD11 | LEU | 83 | 11.357 | 58.087 | 22.569 |
| ATOM | 858 | HD12 | LEU | 83 | 10.437 | 59.501 | 23.136 |
| ATOM | 859 | HD13 | LEU | 83 | 12.137 | 59.685 | 22.643 |
| ATOM | 860 | CD2  | LEU | 83 | 10.834 | 57.875 | 25.264 |
| ATOM | 861 | HD21 | LEU | 83 | 11.141 | 57.723 | 26.299 |
| ATOM | 862 | HD22 | LEU | 83 | 9.864  | 58.371 | 25.243 |
| ATOM | 863 | HD23 | LEU | 83 | 10.760 | 56.910 | 24.762 |
| ATOM | 864 | C    | LEU | 83 | 14.994 | 56.878 | 25.769 |
| ATOM | 865 | O    | LEU | 83 | 14.908 | 55.750 | 26.255 |
| ATOM | 866 | N    | TRP | 84 | 16.065 | 57.273 | 25.050 |
| ATOM | 867 | H    | TRP | 84 | 16.126 | 58.135 | 24.800 |
| ATOM | 868 | CA   | TRP | 84 | 17.099 | 56.343 | 24.683 |



|      |     |     |     |    |        |        |        |
|------|-----|-----|-----|----|--------|--------|--------|
| ATOM | 869 | HA  | TRP | 84 | 16.653 | 55.439 | 24.269 |
| ATOM | 870 | CB  | TRP | 84 | 18.024 | 56.958 | 23.631 |
| ATOM | 871 | HB2 | TRP | 84 | 17.456 | 57.223 | 22.739 |
| ATOM | 872 | HB3 | TRP | 84 | 18.508 | 57.849 | 24.030 |
| ATOM | 873 | CG  | TRP | 84 | 19.119 | 56.039 | 23.184 |
| ATOM | 874 | CD1 | TRP | 84 | 20.398 | 56.385 | 22.858 |
| ATOM | 875 | HD1 | TRP | 84 | 20.654 | 57.442 | 22.930 |
| ATOM | 876 | NE1 | TRP | 84 | 21.114 | 55.270 | 22.494 |
| ATOM | 877 | HE1 | TRP | 84 | 22.013 | 55.269 | 22.231 |
| ATOM | 878 | CE2 | TRP | 84 | 20.293 | 54.172 | 22.582 |
| ATOM | 879 | CZ2 | TRP | 84 | 20.561 | 52.830 | 22.319 |
| ATOM | 880 | HZ2 | TRP | 84 | 21.563 | 52.556 | 21.989 |
| ATOM | 881 | CH2 | TRP | 84 | 19.542 | 51.936 | 22.493 |
| ATOM | 882 | HH2 | TRP | 84 | 19.712 | 50.877 | 22.297 |
| ATOM | 883 | CZ3 | TRP | 84 | 18.277 | 52.352 | 22.920 |
| ATOM | 884 | HZ3 | TRP | 84 | 17.472 | 51.630 | 23.055 |
| ATOM | 885 | CE3 | TRP | 84 | 18.007 | 53.682 | 23.183 |
| ATOM | 886 | HE3 | TRP | 84 | 17.004 | 53.953 | 23.514 |
| ATOM | 887 | CD2 | TRP | 84 | 19.031 | 54.618 | 23.013 |
| ATOM | 888 | C   | TRP | 84 | 17.936 | 55.871 | 25.826 |
| ATOM | 889 | O   | TRP | 84 | 18.104 | 54.669 | 26.019 |
| ATOM | 890 | N   | MET | 85 | 18.481 | 56.808 | 26.620 |
| ATOM | 891 | H   | MET | 85 | 18.245 | 57.668 | 26.497 |
| ATOM | 892 | CA  | MET | 85 | 19.421 | 56.462 | 27.648 |
| ATOM | 893 | HA  | MET | 85 | 20.241 | 55.886 | 27.220 |
| ATOM | 894 | CB  | MET | 85 | 19.996 | 57.724 | 28.295 |
| ATOM | 895 | HB2 | MET | 85 | 19.151 | 58.344 | 28.595 |
| ATOM | 896 | HB3 | MET | 85 | 20.547 | 57.408 | 29.181 |
| ATOM | 897 | CG  | MET | 85 | 20.914 | 58.524 | 27.387 |
| ATOM | 898 | HG2 | MET | 85 | 21.792 | 57.915 | 27.171 |
| ATOM | 899 | HG3 | MET | 85 | 20.378 | 58.731 | 26.460 |
| ATOM | 900 | SD  | MET | 85 | 21.441 | 60.081 | 28.127 |
| ATOM | 901 | CE  | MET | 85 | 22.518 | 59.489 | 29.430 |
| ATOM | 902 | HE1 | MET | 85 | 23.336 | 58.915 | 28.994 |
| ATOM | 903 | HE2 | MET | 85 | 22.924 | 60.338 | 29.980 |
| ATOM | 904 | HE3 | MET | 85 | 21.951 | 58.853 | 30.110 |
| ATOM | 905 | C   | MET | 85 | 18.804 | 55.592 | 28.701 |
| ATOM | 906 | O   | MET | 85 | 19.435 | 54.637 | 29.149 |
| ATOM | 907 | N   | PRO | 86 | 17.616 | 55.867 | 29.146 |
| ATOM | 908 | CD  | PRO | 86 | 16.775 | 57.149 | 28.921 |
| ATOM | 909 | HD2 | PRO | 86 | 16.182 | 57.069 | 28.010 |
| ATOM | 910 | HD3 | PRO | 86 | 17.416 | 58.028 | 28.861 |
| ATOM | 911 | CG  | PRO | 86 | 15.928 | 57.141 | 30.163 |
| ATOM | 912 | HG2 | PRO | 86 | 14.977 | 57.632 | 29.957 |
| ATOM | 913 | HG3 | PRO | 86 | 16.447 | 57.675 | 30.960 |
| ATOM | 914 | CB  | PRO | 86 | 15.734 | 55.706 | 30.522 |
| ATOM | 915 | HB2 | PRO | 86 | 14.941 | 55.266 | 29.918 |
| ATOM | 916 | HB3 | PRO | 86 | 15.505 | 55.567 | 31.579 |
| ATOM | 917 | CA  | PRO | 86 | 17.071 | 55.043 | 30.187 |
| ATOM | 918 | HA  | PRO | 86 | 17.763 | 55.076 | 31.028 |
| ATOM | 919 | C   | PRO | 86 | 16.862 | 53.623 | 29.771 |
| ATOM | 920 | O   | PRO | 86 | 17.063 | 52.731 | 30.593 |

|      |     |      |     |    |        |        |        |
|------|-----|------|-----|----|--------|--------|--------|
| ATOM | 921 | N    | GLN | 87 | 16.442 | 53.390 | 28.516 |
| ATOM | 922 | H    | GLN | 87 | 16.297 | 54.094 | 27.975 |
| ATOM | 923 | CA   | GLN | 87 | 16.225 | 52.060 | 28.033 |
| ATOM | 924 | HA   | GLN | 87 | 15.617 | 51.503 | 28.746 |
| ATOM | 925 | CB   | GLN | 87 | 15.496 | 52.091 | 26.688 |
| ATOM | 926 | HB2  | GLN | 87 | 14.595 | 52.688 | 26.825 |
| ATOM | 927 | HB3  | GLN | 87 | 16.156 | 52.587 | 25.976 |
| ATOM | 928 | CG   | GLN | 87 | 15.118 | 50.718 | 26.156 |
| ATOM | 929 | HG2  | GLN | 87 | 14.671 | 50.837 | 25.169 |
| ATOM | 930 | HG3  | GLN | 87 | 16.021 | 50.113 | 26.075 |
| ATOM | 931 | CD   | GLN | 87 | 14.130 | 49.997 | 27.051 |
| ATOM | 932 | OE1  | GLN | 87 | 13.066 | 50.527 | 27.370 |
| ATOM | 933 | NE2  | GLN | 87 | 14.480 | 48.783 | 27.460 |
| ATOM | 934 | HE21 | GLN | 87 | 13.929 | 48.312 | 27.993 |
| ATOM | 935 | HE22 | GLN | 87 | 15.268 | 48.432 | 27.203 |
| ATOM | 936 | C    | GLN | 87 | 17.550 | 51.372 | 27.922 |
| ATOM | 937 | O    | GLN | 87 | 17.678 | 50.196 | 28.260 |
| ATOM | 938 | N    | GLU | 88 | 18.575 | 52.104 | 27.439 |
| ATOM | 939 | H    | GLU | 88 | 18.417 | 52.968 | 27.240 |
| ATOM | 940 | CA   | GLU | 88 | 19.883 | 51.549 | 27.239 |
| ATOM | 941 | HA   | GLU | 88 | 19.809 | 50.627 | 26.662 |
| ATOM | 942 | CB   | GLU | 88 | 20.772 | 52.533 | 26.476 |
| ATOM | 943 | HB2  | GLU | 88 | 20.261 | 52.771 | 25.543 |
| ATOM | 944 | HB3  | GLU | 88 | 20.852 | 53.433 | 27.086 |
| ATOM | 945 | CG   | GLU | 88 | 22.164 | 52.004 | 26.170 |
| ATOM | 946 | HG2  | GLU | 88 | 22.737 | 52.812 | 25.716 |
| ATOM | 947 | HG3  | GLU | 88 | 22.628 | 51.715 | 27.113 |
| ATOM | 948 | CD   | GLU | 88 | 22.141 | 50.813 | 25.233 |
| ATOM | 949 | OE1  | GLU | 88 | 21.125 | 50.628 | 24.532 |
| ATOM | 950 | OE2  | GLU | 88 | 23.141 | 50.064 | 25.201 |
| ATOM | 951 | C    | GLU | 88 | 20.506 | 51.192 | 28.553 |
| ATOM | 952 | O    | GLU | 88 | 21.175 | 50.167 | 28.666 |
| ATOM | 953 | N    | ALA | 89 | 20.294 | 52.024 | 29.590 |
| ATOM | 954 | H    | ALA | 89 | 19.754 | 52.735 | 29.476 |
| ATOM | 955 | CA   | ALA | 89 | 20.915 | 51.791 | 30.864 |
| ATOM | 956 | HA   | ALA | 89 | 21.999 | 51.735 | 30.760 |
| ATOM | 957 | CB   | ALA | 89 | 20.577 | 52.914 | 31.832 |
| ATOM | 958 | HB1  | ALA | 89 | 19.496 | 52.976 | 31.954 |
| ATOM | 959 | HB2  | ALA | 89 | 21.040 | 52.713 | 32.798 |
| ATOM | 960 | HB3  | ALA | 89 | 20.953 | 53.859 | 31.439 |
| ATOM | 961 | C    | ALA | 89 | 20.459 | 50.466 | 31.385 |
| ATOM | 962 | O    | ALA | 89 | 21.252 | 49.691 | 31.920 |
| ATOM | 963 | N    | VAL | 90 | 19.160 | 50.164 | 31.227 |
| ATOM | 964 | H    | VAL | 90 | 18.619 | 50.749 | 30.809 |
| ATOM | 965 | CA   | VAL | 90 | 18.634 | 48.925 | 31.716 |
| ATOM | 966 | HA   | VAL | 90 | 18.847 | 48.791 | 32.776 |
| ATOM | 967 | CB   | VAL | 90 | 17.111 | 48.836 | 31.505 |
| ATOM | 968 | HB   | VAL | 90 | 16.883 | 49.068 | 30.465 |
| ATOM | 969 | CG1  | VAL | 90 | 16.609 | 47.439 | 31.834 |
| ATOM | 970 | HG11 | VAL | 90 | 16.836 | 47.206 | 32.874 |
| ATOM | 971 | HG12 | VAL | 90 | 15.531 | 47.394 | 31.679 |
| ATOM | 972 | HG13 | VAL | 90 | 17.099 | 46.714 | 31.184 |

|      |      |      |     |    |        |        |        |
|------|------|------|-----|----|--------|--------|--------|
| ATOM | 973  | CG2  | VAL | 90 | 16.395 | 49.877 | 32.352 |
| ATOM | 974  | HG21 | VAL | 90 | 16.734 | 50.873 | 32.068 |
| ATOM | 975  | HG22 | VAL | 90 | 15.320 | 49.800 | 32.191 |
| ATOM | 976  | HG23 | VAL | 90 | 16.617 | 49.705 | 33.405 |
| ATOM | 977  | C    | VAL | 90 | 19.354 | 47.820 | 31.014 |
| ATOM | 978  | O    | VAL | 90 | 19.729 | 46.825 | 31.627 |
| ATOM | 979  | N    | LEU | 91 | 19.565 | 47.963 | 29.696 |
| ATOM | 980  | H    | LEU | 91 | 19.278 | 48.708 | 29.281 |
| ATOM | 981  | CA   | LEU | 91 | 20.240 | 46.942 | 28.951 |
| ATOM | 982  | HA   | LEU | 91 | 19.764 | 45.978 | 29.130 |
| ATOM | 983  | CB   | LEU | 91 | 20.182 | 47.245 | 27.452 |
| ATOM | 984  | HB2  | LEU | 91 | 20.551 | 48.268 | 27.377 |
| ATOM | 985  | HB3  | LEU | 91 | 20.873 | 46.572 | 26.945 |
| ATOM | 986  | CG   | LEU | 91 | 18.804 | 47.151 | 26.794 |
| ATOM | 987  | HG   | LEU | 91 | 18.100 | 47.762 | 27.359 |
| ATOM | 988  | CD1  | LEU | 91 | 18.861 | 47.643 | 25.356 |
| ATOM | 989  | HD11 | LEU | 91 | 19.564 | 47.032 | 24.790 |
| ATOM | 990  | HD12 | LEU | 91 | 17.871 | 47.568 | 24.906 |
| ATOM | 991  | HD13 | LEU | 91 | 19.189 | 48.682 | 25.340 |
| ATOM | 992  | CD2  | LEU | 91 | 18.281 | 45.724 | 26.845 |
| ATOM | 993  | HD21 | LEU | 91 | 18.198 | 45.404 | 27.884 |
| ATOM | 994  | HD22 | LEU | 91 | 17.300 | 45.679 | 26.372 |
| ATOM | 995  | HD23 | LEU | 91 | 18.970 | 45.065 | 26.316 |
| ATOM | 996  | C    | LEU | 91 | 21.656 | 46.834 | 29.420 |
| ATOM | 997  | O    | LEU | 91 | 22.214 | 45.746 | 29.509 |
| ATOM | 998  | N    | GLY | 92 | 22.324 | 47.955 | 29.710 |
| ATOM | 999  | H    | GLY | 92 | 21.978 | 48.785 | 29.671 |
| ATOM | 1000 | CA   | GLY | 92 | 23.686 | 47.766 | 30.106 |
| ATOM | 1001 | HA2  | GLY | 92 | 24.213 | 47.205 | 29.334 |
| ATOM | 1002 | HA3  | GLY | 92 | 24.163 | 48.737 | 30.239 |
| ATOM | 1003 | C    | GLY | 92 | 23.758 | 47.006 | 31.397 |
| ATOM | 1004 | O    | GLY | 92 | 24.471 | 46.009 | 31.491 |
| ATOM | 1005 | N    | LEU | 93 | 23.020 | 47.451 | 32.434 |
| ATOM | 1006 | H    | LEU | 93 | 22.445 | 48.138 | 32.347 |
| ATOM | 1007 | CA   | LEU | 93 | 23.171 | 46.797 | 33.704 |
| ATOM | 1008 | HA   | LEU | 93 | 24.230 | 46.691 | 33.941 |
| ATOM | 1009 | CB   | LEU | 93 | 22.502 | 47.615 | 34.811 |
| ATOM | 1010 | HB2  | LEU | 93 | 22.984 | 48.590 | 34.744 |
| ATOM | 1011 | HB3  | LEU | 93 | 21.445 | 47.715 | 34.565 |
| ATOM | 1012 | CG   | LEU | 93 | 22.645 | 47.073 | 36.234 |
| ATOM | 1013 | HG   | LEU | 93 | 22.364 | 47.855 | 36.939 |
| ATOM | 1014 | CD1  | LEU | 93 | 21.751 | 45.860 | 36.440 |
| ATOM | 1015 | HD11 | LEU | 93 | 22.032 | 45.077 | 35.735 |
| ATOM | 1016 | HD12 | LEU | 93 | 21.868 | 45.490 | 37.459 |
| ATOM | 1017 | HD13 | LEU | 93 | 20.711 | 46.142 | 36.274 |
| ATOM | 1018 | CD2  | LEU | 93 | 24.094 | 46.719 | 36.532 |
| ATOM | 1019 | HD21 | LEU | 93 | 24.714 | 47.610 | 36.431 |
| ATOM | 1020 | HD22 | LEU | 93 | 24.173 | 46.335 | 37.549 |
| ATOM | 1021 | HD23 | LEU | 93 | 24.434 | 45.958 | 35.830 |
| ATOM | 1022 | C    | LEU | 93 | 22.625 | 45.397 | 33.771 |
| ATOM | 1023 | O    | LEU | 93 | 23.372 | 44.479 | 34.106 |
| ATOM | 1024 | N    | LEU | 94 | 21.331 | 45.157 | 33.460 |

|      |      |      |     |    |        |        |        |
|------|------|------|-----|----|--------|--------|--------|
| ATOM | 1025 | H    | LEU | 94 | 20.758 | 45.789 | 33.173 |
| ATOM | 1026 | CA   | LEU | 94 | 20.885 | 43.794 | 33.612 |
| ATOM | 1027 | HA   | LEU | 94 | 21.250 | 43.389 | 34.556 |
| ATOM | 1028 | CB   | LEU | 94 | 19.356 | 43.727 | 33.610 |
| ATOM | 1029 | HB2  | LEU | 94 | 19.071 | 44.265 | 32.706 |
| ATOM | 1030 | HB3  | LEU | 94 | 19.065 | 42.681 | 33.517 |
| ATOM | 1031 | CG   | LEU | 94 | 18.649 | 44.347 | 34.816 |
| ATOM | 1032 | HG   | LEU | 94 | 19.011 | 45.366 | 34.951 |
| ATOM | 1033 | CD1  | LEU | 94 | 17.143 | 44.368 | 34.604 |
| ATOM | 1034 | HD11 | LEU | 94 | 16.780 | 43.349 | 34.469 |
| ATOM | 1035 | HD12 | LEU | 94 | 16.659 | 44.813 | 35.474 |
| ATOM | 1036 | HD13 | LEU | 94 | 16.909 | 44.957 | 33.717 |
| ATOM | 1037 | CD2  | LEU | 94 | 18.993 | 43.589 | 36.089 |
| ATOM | 1038 | HD21 | LEU | 94 | 20.070 | 43.626 | 36.255 |
| ATOM | 1039 | HD22 | LEU | 94 | 18.480 | 44.046 | 36.935 |
| ATOM | 1040 | HD23 | LEU | 94 | 18.676 | 42.551 | 35.991 |
| ATOM | 1041 | C    | LEU | 94 | 21.418 | 42.882 | 32.546 |
| ATOM | 1042 | O    | LEU | 94 | 21.838 | 41.762 | 32.834 |
| ATOM | 1043 | N    | PRO | 95 | 21.422 | 43.324 | 31.325 |
| ATOM | 1044 | CD   | PRO | 95 | 20.736 | 44.566 | 30.837 |
| ATOM | 1045 | HD2  | PRO | 95 | 21.412 | 45.420 | 30.875 |
| ATOM | 1046 | HD3  | PRO | 95 | 19.850 | 44.777 | 31.435 |
| ATOM | 1047 | CG   | PRO | 95 | 20.395 | 44.162 | 29.429 |
| ATOM | 1048 | HG2  | PRO | 95 | 20.346 | 45.050 | 28.798 |
| ATOM | 1049 | HG3  | PRO | 95 | 19.429 | 43.657 | 29.420 |
| ATOM | 1050 | CB   | PRO | 95 | 21.482 | 43.240 | 28.989 |
| ATOM | 1051 | HB2  | PRO | 95 | 22.345 | 43.779 | 28.598 |
| ATOM | 1052 | HB3  | PRO | 95 | 21.117 | 42.543 | 28.234 |
| ATOM | 1053 | CA   | PRO | 95 | 21.875 | 42.478 | 30.256 |
| ATOM | 1054 | HA   | PRO | 95 | 21.327 | 41.541 | 30.351 |
| ATOM | 1055 | C    | PRO | 95 | 23.330 | 42.199 | 30.237 |
| ATOM | 1056 | O    | PRO | 95 | 23.737 | 41.379 | 29.414 |
| ATOM | 1057 | N    | THR | 96 | 24.120 | 42.868 | 31.098 |
| ATOM | 1058 | H    | THR | 96 | 23.746 | 43.436 | 31.688 |
| ATOM | 1059 | CA   | THR | 96 | 25.540 | 42.685 | 31.083 |
| ATOM | 1060 | HA   | THR | 96 | 25.922 | 42.949 | 30.097 |
| ATOM | 1061 | CB   | THR | 96 | 26.234 | 43.572 | 32.133 |
| ATOM | 1062 | HB   | THR | 96 | 25.901 | 44.602 | 32.004 |
| ATOM | 1063 | CG2  | THR | 96 | 25.891 | 43.101 | 33.538 |
| ATOM | 1064 | HG21 | THR | 96 | 26.225 | 42.071 | 33.668 |
| ATOM | 1065 | HG22 | THR | 96 | 26.390 | 43.739 | 34.268 |
| ATOM | 1066 | HG23 | THR | 96 | 24.812 | 43.155 | 33.687 |
| ATOM | 1067 | OG1  | THR | 96 | 27.655 | 43.499 | 31.960 |
| ATOM | 1068 | HG1  | THR | 96 | 27.905 | 42.713 | 32.054 |
| ATOM | 1069 | C    | THR | 96 | 25.828 | 41.244 | 31.329 |
| ATOM | 1070 | O    | THR | 96 | 25.008 | 40.514 | 31.883 |
| ATOM | 1071 | N    | GLY | 97 | 27.021 | 40.799 | 30.890 |
| ATOM | 1072 | H    | GLY | 97 | 27.589 | 41.385 | 30.509 |
| ATOM | 1073 | CA   | GLY | 97 | 27.393 | 39.423 | 31.020 |
| ATOM | 1074 | HA2  | GLY | 97 | 26.550 | 38.777 | 30.773 |
| ATOM | 1075 | HA3  | GLY | 97 | 28.231 | 39.193 | 30.362 |
| ATOM | 1076 | C    | GLY | 97 | 27.800 | 39.170 | 32.431 |

|      |      |     |     |     |        |        |        |
|------|------|-----|-----|-----|--------|--------|--------|
| ATOM | 1077 | O   | GLY | 97  | 27.979 | 40.093 | 33.224 |
| ATOM | 1078 | N   | SER | 98  | 27.955 | 37.876 | 32.766 |
| ATOM | 1079 | H   | SER | 98  | 27.813 | 37.262 | 32.124 |
| ATOM | 1080 | CA  | SER | 98  | 28.330 | 37.461 | 34.082 |
| ATOM | 1081 | HA  | SER | 98  | 28.946 | 38.229 | 34.550 |
| ATOM | 1082 | CB  | SER | 98  | 27.088 | 37.237 | 34.947 |
| ATOM | 1083 | HB2 | SER | 98  | 27.405 | 37.074 | 35.977 |
| ATOM | 1084 | HB3 | SER | 98  | 26.462 | 38.128 | 34.897 |
| ATOM | 1085 | OG  | SER | 98  | 26.349 | 36.115 | 34.497 |
| ATOM | 1086 | HG  | SER | 98  | 26.825 | 35.437 | 34.535 |
| ATOM | 1087 | C   | SER | 98  | 29.144 | 36.220 | 33.889 |
| ATOM | 1088 | O   | SER | 98  | 29.488 | 35.869 | 32.762 |
| ATOM | 1089 | N   | ALA | 99  | 29.503 | 35.535 | 34.990 |
| ATOM | 1090 | H   | ALA | 99  | 29.269 | 35.835 | 35.806 |
| ATOM | 1091 | CA  | ALA | 99  | 30.259 | 34.325 | 34.862 |
| ATOM | 1092 | HA  | ALA | 99  | 31.179 | 34.457 | 34.292 |
| ATOM | 1093 | CB  | ALA | 99  | 30.613 | 33.774 | 36.235 |
| ATOM | 1094 | HB1 | ALA | 99  | 29.701 | 33.628 | 36.814 |
| ATOM | 1095 | HB2 | ALA | 99  | 31.128 | 32.820 | 36.122 |
| ATOM | 1096 | HB3 | ALA | 99  | 31.263 | 34.479 | 36.753 |
| ATOM | 1097 | C   | ALA | 99  | 29.406 | 33.398 | 34.065 |
| ATOM | 1098 | O   | ALA | 99  | 29.880 | 32.710 | 33.162 |
| ATOM | 1099 | N   | GLU | 100 | 28.099 | 33.387 | 34.377 |
| ATOM | 1100 | H   | GLU | 100 | 27.816 | 33.901 | 35.059 |
| ATOM | 1101 | CA  | GLU | 100 | 27.165 | 32.582 | 33.652 |
| ATOM | 1102 | HA  | GLU | 100 | 27.480 | 31.539 | 33.676 |
| ATOM | 1103 | CB  | GLU | 100 | 25.771 | 32.686 | 34.275 |
| ATOM | 1104 | HB2 | GLU | 100 | 25.521 | 33.746 | 34.329 |
| ATOM | 1105 | HB3 | GLU | 100 | 25.079 | 32.184 | 33.599 |
| ATOM | 1106 | CG  | GLU | 100 | 25.663 | 32.069 | 35.660 |
| ATOM | 1107 | HG2 | GLU | 100 | 25.959 | 31.023 | 35.585 |
| ATOM | 1108 | HG3 | GLU | 100 | 26.356 | 32.596 | 36.316 |
| ATOM | 1109 | CD  | GLU | 100 | 24.261 | 32.158 | 36.230 |
| ATOM | 1110 | OE1 | GLU | 100 | 23.393 | 32.774 | 35.577 |
| ATOM | 1111 | OE2 | GLU | 100 | 24.031 | 31.611 | 37.329 |
| ATOM | 1112 | C   | GLU | 100 | 27.263 | 33.129 | 32.264 |
| ATOM | 1113 | O   | GLU | 100 | 27.585 | 34.309 | 32.133 |
| ATOM | 1114 | N   | PRO | 101 | 27.050 | 32.334 | 31.234 |
| ATOM | 1115 | CD  | PRO | 101 | 26.613 | 30.837 | 31.293 |
| ATOM | 1116 | HD2 | PRO | 101 | 25.564 | 30.750 | 31.577 |
| ATOM | 1117 | HD3 | PRO | 101 | 27.228 | 30.281 | 32.001 |
| ATOM | 1118 | CG  | PRO | 101 | 26.862 | 30.424 | 29.869 |
| ATOM | 1119 | HG2 | PRO | 101 | 26.179 | 29.619 | 29.600 |
| ATOM | 1120 | HG3 | PRO | 101 | 27.890 | 30.077 | 29.766 |
| ATOM | 1121 | CB  | PRO | 101 | 26.625 | 31.640 | 29.038 |
| ATOM | 1122 | HB2 | PRO | 101 | 25.545 | 31.749 | 28.938 |
| ATOM | 1123 | HB3 | PRO | 101 | 27.083 | 31.640 | 28.049 |
| ATOM | 1124 | CA  | PRO | 101 | 27.188 | 32.791 | 29.874 |
| ATOM | 1125 | HA  | PRO | 101 | 28.239 | 32.981 | 29.655 |
| ATOM | 1126 | C   | PRO | 101 | 26.410 | 34.051 | 29.702 |
| ATOM | 1127 | O   | PRO | 101 | 25.305 | 34.160 | 30.231 |
| ATOM | 1128 | N   | PRO | 102 | 26.984 | 34.989 | 29.012 |

|      |      |     |     |     |        |        |        |
|------|------|-----|-----|-----|--------|--------|--------|
| ATOM | 1129 | CD  | PRO | 102 | 28.283 | 34.924 | 28.267 |
| ATOM | 1130 | HD2 | PRO | 102 | 28.314 | 34.029 | 27.645 |
| ATOM | 1131 | HD3 | PRO | 102 | 29.117 | 34.907 | 28.969 |
| ATOM | 1132 | CG  | PRO | 102 | 28.243 | 36.189 | 27.456 |
| ATOM | 1133 | HG2 | PRO | 102 | 27.819 | 35.977 | 26.474 |
| ATOM | 1134 | HG3 | PRO | 102 | 29.255 | 36.577 | 27.338 |
| ATOM | 1135 | CB  | PRO | 102 | 27.392 | 37.145 | 28.222 |
| ATOM | 1136 | HB2 | PRO | 102 | 26.901 | 37.847 | 27.548 |
| ATOM | 1137 | HB3 | PRO | 102 | 27.960 | 37.698 | 28.970 |
| ATOM | 1138 | CA  | PRO | 102 | 26.346 | 36.263 | 28.907 |
| ATOM | 1139 | HA  | PRO | 102 | 26.128 | 36.603 | 29.919 |
| ATOM | 1140 | C   | PRO | 102 | 25.091 | 36.236 | 28.114 |
| ATOM | 1141 | O   | PRO | 102 | 25.027 | 35.552 | 27.094 |
| ATOM | 1142 | N   | ALA | 103 | 24.079 | 36.977 | 28.592 |
| ATOM | 1143 | H   | ALA | 103 | 24.199 | 37.392 | 29.381 |
| ATOM | 1144 | CA  | ALA | 103 | 22.845 | 37.118 | 27.892 |
| ATOM | 1145 | HA  | ALA | 103 | 22.940 | 37.042 | 26.809 |
| ATOM | 1146 | CB  | ALA | 103 | 21.845 | 36.075 | 28.366 |
| ATOM | 1147 | HB1 | ALA | 103 | 21.732 | 36.144 | 29.448 |
| ATOM | 1148 | HB2 | ALA | 103 | 20.881 | 36.252 | 27.889 |
| ATOM | 1149 | HB3 | ALA | 103 | 22.204 | 35.080 | 28.102 |
| ATOM | 1150 | C   | ALA | 103 | 22.423 | 38.517 | 28.166 |
| ATOM | 1151 | O   | ALA | 103 | 22.629 | 39.030 | 29.264 |
| ATOM | 1152 | N   | ASP | 104 | 21.836 | 39.191 | 27.165 |
| ATOM | 1153 | H   | ASP | 104 | 21.704 | 38.828 | 26.352 |
| ATOM | 1154 | CA  | ASP | 104 | 21.415 | 40.529 | 27.426 |
| ATOM | 1155 | HA  | ASP | 104 | 21.897 | 40.898 | 28.331 |
| ATOM | 1156 | CB  | ASP | 104 | 21.793 | 41.447 | 26.262 |
| ATOM | 1157 | HB2 | ASP | 104 | 21.414 | 40.998 | 25.344 |
| ATOM | 1158 | HB3 | ASP | 104 | 21.307 | 42.409 | 26.423 |
| ATOM | 1159 | CG  | ASP | 104 | 23.291 | 41.651 | 26.143 |
| ATOM | 1160 | OD1 | ASP | 104 | 24.011 | 41.344 | 27.117 |
| ATOM | 1161 | OD2 | ASP | 104 | 23.744 | 42.117 | 25.077 |
| ATOM | 1162 | C   | ASP | 104 | 19.946 | 40.484 | 27.655 |
| ATOM | 1163 | O   | ASP | 104 | 19.197 | 39.994 | 26.811 |
| ATOM | 1164 | N   | TRP | 105 | 19.468 | 40.961 | 28.822 |
| ATOM | 1165 | H   | TRP | 105 | 19.936 | 41.319 | 29.503 |
| ATOM | 1166 | CA  | TRP | 105 | 18.050 | 40.851 | 28.912 |
| ATOM | 1167 | HA  | TRP | 105 | 17.673 | 40.249 | 28.085 |
| ATOM | 1168 | CB  | TRP | 105 | 17.647 | 40.182 | 30.228 |
| ATOM | 1169 | HB2 | TRP | 105 | 18.099 | 39.193 | 30.300 |
| ATOM | 1170 | HB3 | TRP | 105 | 17.968 | 40.790 | 31.074 |
| ATOM | 1171 | CG  | TRP | 105 | 16.169 | 39.990 | 30.374 |
| ATOM | 1172 | CD1 | TRP | 105 | 15.260 | 40.916 | 30.801 |
| ATOM | 1173 | HD1 | TRP | 105 | 15.647 | 41.900 | 31.063 |
| ATOM | 1174 | NE1 | TRP | 105 | 13.997 | 40.374 | 30.805 |
| ATOM | 1175 | HE1 | TRP | 105 | 13.218 | 40.827 | 31.061 |
| ATOM | 1176 | CE2 | TRP | 105 | 14.075 | 39.073 | 30.375 |
| ATOM | 1177 | CZ2 | TRP | 105 | 13.069 | 38.122 | 30.210 |
| ATOM | 1178 | HZ2 | TRP | 105 | 12.043 | 38.406 | 30.446 |
| ATOM | 1179 | CH2 | TRP | 105 | 13.435 | 36.885 | 29.760 |
| ATOM | 1180 | HH2 | TRP | 105 | 12.677 | 36.114 | 29.619 |

|      |      |     |     |     |        |        |        |
|------|------|-----|-----|-----|--------|--------|--------|
| ATOM | 1181 | CZ3 | TRP | 105 | 14.771 | 36.583 | 29.474 |
| ATOM | 1182 | HZ3 | TRP | 105 | 15.052 | 35.593 | 29.115 |
| ATOM | 1183 | CE3 | TRP | 105 | 15.772 | 37.523 | 29.636 |
| ATOM | 1184 | HE3 | TRP | 105 | 16.796 | 37.235 | 29.399 |
| ATOM | 1185 | CD2 | TRP | 105 | 15.426 | 38.797 | 30.095 |
| ATOM | 1186 | C   | TRP | 105 | 17.365 | 42.170 | 28.801 |
| ATOM | 1187 | O   | TRP | 105 | 17.434 | 43.028 | 29.682 |
| ATOM | 1188 | N   | ASP | 106 | 16.667 | 42.333 | 27.659 |
| ATOM | 1189 | H   | ASP | 106 | 16.712 | 41.663 | 27.060 |
| ATOM | 1190 | CA  | ASP | 106 | 15.884 | 43.494 | 27.375 |
| ATOM | 1191 | HA  | ASP | 106 | 16.300 | 44.356 | 27.895 |
| ATOM | 1192 | CB  | ASP | 106 | 15.881 | 43.784 | 25.873 |
| ATOM | 1193 | HB2 | ASP | 106 | 16.917 | 43.880 | 25.548 |
| ATOM | 1194 | HB3 | ASP | 106 | 15.420 | 42.935 | 25.369 |
| ATOM | 1195 | CG  | ASP | 106 | 15.123 | 45.050 | 25.525 |
| ATOM | 1196 | OD1 | ASP | 106 | 14.462 | 45.612 | 26.424 |
| ATOM | 1197 | OD2 | ASP | 106 | 15.190 | 45.480 | 24.355 |
| ATOM | 1198 | C   | ASP | 106 | 14.524 | 43.199 | 27.916 |
| ATOM | 1199 | O   | ASP | 106 | 13.829 | 42.303 | 27.440 |
| ATOM | 1200 | N   | GLY | 107 | 14.152 | 43.929 | 28.979 |
| ATOM | 1201 | H   | GLY | 107 | 14.757 | 44.537 | 29.250 |
| ATOM | 1202 | CA  | GLY | 107 | 12.903 | 43.800 | 29.674 |
| ATOM | 1203 | HA2 | GLY | 107 | 12.742 | 42.749 | 29.916 |
| ATOM | 1204 | HA3 | GLY | 107 | 12.952 | 44.381 | 30.595 |
| ATOM | 1205 | C   | GLY | 107 | 11.753 | 44.292 | 28.847 |
| ATOM | 1206 | O   | GLY | 107 | 10.633 | 43.798 | 28.972 |
| ATOM | 1207 | N   | ALA | 108 | 12.011 | 45.295 | 27.988 |
| ATOM | 1208 | H   | ALA | 108 | 12.882 | 45.490 | 27.872 |
| ATOM | 1209 | CA  | ALA | 108 | 11.007 | 46.039 | 27.277 |
| ATOM | 1210 | HA  | ALA | 108 | 10.369 | 46.517 | 28.020 |
| ATOM | 1211 | CB  | ALA | 108 | 11.653 | 47.120 | 26.424 |
| ATOM | 1212 | HB1 | ALA | 108 | 12.288 | 46.657 | 25.669 |
| ATOM | 1213 | HB2 | ALA | 108 | 10.878 | 47.709 | 25.934 |
| ATOM | 1214 | HB3 | ALA | 108 | 12.257 | 47.771 | 27.057 |
| ATOM | 1215 | C   | ALA | 108 | 10.144 | 45.182 | 26.405 |
| ATOM | 1216 | O   | ALA | 108 | 8.951  | 45.449 | 26.275 |
| ATOM | 1217 | N   | GLY | 109 | 10.695 | 44.144 | 25.757 |
| ATOM | 1218 | H   | GLY | 109 | 11.563 | 43.925 | 25.846 |
| ATOM | 1219 | CA  | GLY | 109 | 9.845  | 43.372 | 24.898 |
| ATOM | 1220 | HA2 | GLY | 109 | 10.017 | 42.304 | 25.033 |
| ATOM | 1221 | HA3 | GLY | 109 | 8.794  | 43.597 | 25.081 |
| ATOM | 1222 | C   | GLY | 109 | 10.184 | 43.745 | 23.492 |
| ATOM | 1223 | O   | GLY | 109 | 10.914 | 44.704 | 23.250 |
| ATOM | 1224 | N   | GLY | 110 | 9.651  | 42.977 | 22.523 |
| ATOM | 1225 | H   | GLY | 110 | 9.064  | 42.338 | 22.761 |
| ATOM | 1226 | CA  | GLY | 110 | 9.995  | 43.156 | 21.144 |
| ATOM | 1227 | HA2 | GLY | 110 | 11.076 | 43.065 | 21.042 |
| ATOM | 1228 | HA3 | GLY | 110 | 9.509  | 42.374 | 20.561 |
| ATOM | 1229 | C   | GLY | 110 | 9.566  | 44.493 | 20.621 |
| ATOM | 1230 | O   | GLY | 110 | 10.326 | 45.148 | 19.913 |
| ATOM | 1231 | N   | SER | 111 | 8.340  | 44.941 | 20.948 |
| ATOM | 1232 | H   | SER | 111 | 7.836  | 44.473 | 21.529 |

|      |      |      |     |     |        |        |        |
|------|------|------|-----|-----|--------|--------|--------|
| ATOM | 1233 | CA   | SER | 111 | 7.833  | 46.160 | 20.376 |
| ATOM | 1234 | HA   | SER | 111 | 7.873  | 46.102 | 19.288 |
| ATOM | 1235 | CB   | SER | 111 | 6.381  | 46.388 | 20.801 |
| ATOM | 1236 | HB2  | SER | 111 | 5.778  | 45.553 | 20.445 |
| ATOM | 1237 | HB3  | SER | 111 | 6.338  | 46.429 | 21.889 |
| ATOM | 1238 | OG   | SER | 111 | 5.876  | 47.597 | 20.263 |
| ATOM | 1239 | HG   | SER | 111 | 5.909  | 47.565 | 19.434 |
| ATOM | 1240 | C    | SER | 111 | 8.679  | 47.328 | 20.777 |
| ATOM | 1241 | O    | SER | 111 | 9.095  | 48.123 | 19.936 |
| ATOM | 1242 | N    | TYR | 112 | 8.970  | 47.444 | 22.083 |
| ATOM | 1243 | H    | TYR | 112 | 8.676  | 46.793 | 22.630 |
| ATOM | 1244 | CA   | TYR | 112 | 9.716  | 48.547 | 22.617 |
| ATOM | 1245 | HA   | TYR | 112 | 9.256  | 49.487 | 22.311 |
| ATOM | 1246 | CB   | TYR | 112 | 9.738  | 48.489 | 24.146 |
| ATOM | 1247 | HB2  | TYR | 112 | 10.012 | 47.472 | 24.428 |
| ATOM | 1248 | HB3  | TYR | 112 | 10.511 | 49.179 | 24.483 |
| ATOM | 1249 | CG   | TYR | 112 | 8.421  | 48.853 | 24.792 |
| ATOM | 1250 | CD1  | TYR | 112 | 8.037  | 48.279 | 25.997 |
| ATOM | 1251 | HD1  | TYR | 112 | 8.703  | 47.559 | 26.471 |
| ATOM | 1252 | CE1  | TYR | 112 | 6.835  | 48.606 | 26.595 |
| ATOM | 1253 | HE1  | TYR | 112 | 6.547  | 48.147 | 27.541 |
| ATOM | 1254 | CZ   | TYR | 112 | 5.999  | 49.518 | 25.989 |
| ATOM | 1255 | OH   | TYR | 112 | 4.802  | 49.846 | 26.582 |
| ATOM | 1256 | HH   | TYR | 112 | 4.720  | 49.421 | 27.291 |
| ATOM | 1257 | CE2  | TYR | 112 | 6.360  | 50.110 | 24.779 |
| ATOM | 1258 | HE2  | TYR | 112 | 5.704  | 50.832 | 24.294 |
| ATOM | 1259 | CD2  | TYR | 112 | 7.566  | 49.771 | 24.195 |
| ATOM | 1260 | HD2  | TYR | 112 | 7.861  | 50.226 | 23.249 |
| ATOM | 1261 | C    | TYR | 112 | 11.101 | 48.527 | 22.062 |
| ATOM | 1262 | O    | TYR | 112 | 11.702 | 49.577 | 21.845 |
| ATOM | 1263 | N    | ARG | 113 | 11.657 | 47.324 | 21.844 |
| ATOM | 1264 | H    | ARG | 113 | 11.178 | 46.581 | 22.014 |
| ATOM | 1265 | CA   | ARG | 113 | 12.998 | 47.214 | 21.346 |
| ATOM | 1266 | HA   | ARG | 113 | 13.687 | 47.714 | 22.027 |
| ATOM | 1267 | CB   | ARG | 113 | 13.407 | 45.744 | 21.229 |
| ATOM | 1268 | HB2  | ARG | 113 | 13.296 | 45.300 | 22.218 |
| ATOM | 1269 | HB3  | ARG | 113 | 12.710 | 45.270 | 20.538 |
| ATOM | 1270 | CG   | ARG | 113 | 14.830 | 45.534 | 20.736 |
| ATOM | 1271 | HG2  | ARG | 113 | 14.951 | 46.059 | 19.788 |
| ATOM | 1272 | HG3  | ARG | 113 | 15.518 | 45.950 | 21.472 |
| ATOM | 1273 | CD   | ARG | 113 | 15.132 | 44.057 | 20.539 |
| ATOM | 1274 | HD2  | ARG | 113 | 16.179 | 43.945 | 20.256 |
| ATOM | 1275 | HD3  | ARG | 113 | 14.951 | 43.529 | 21.475 |
| ATOM | 1276 | NE   | ARG | 113 | 14.299 | 43.462 | 19.497 |
| ATOM | 1277 | HE   | ARG | 113 | 13.631 | 42.984 | 19.755 |
| ATOM | 1278 | CZ   | ARG | 113 | 14.509 | 43.615 | 18.194 |
| ATOM | 1279 | NH1  | ARG | 113 | 13.698 | 43.036 | 17.319 |
| ATOM | 1280 | HH11 | ARG | 113 | 13.036 | 42.562 | 17.595 |
| ATOM | 1281 | HH12 | ARG | 113 | 13.834 | 43.135 | 16.475 |
| ATOM | 1282 | NH2  | ARG | 113 | 15.530 | 44.347 | 17.768 |
| ATOM | 1283 | HH21 | ARG | 113 | 16.056 | 44.722 | 18.336 |
| ATOM | 1284 | HH22 | ARG | 113 | 15.666 | 44.446 | 16.925 |



|      |      |      |     |     |        |        |        |
|------|------|------|-----|-----|--------|--------|--------|
| ATOM | 1285 | C    | ARG | 113 | 13.068 | 47.912 | 20.023 |
| ATOM | 1286 | O    | ARG | 113 | 14.000 | 48.674 | 19.771 |
| ATOM | 1287 | N    | LEU | 114 | 12.081 | 47.661 | 19.139 |
| ATOM | 1288 | H    | LEU | 114 | 11.413 | 47.107 | 19.378 |
| ATOM | 1289 | CA   | LEU | 114 | 12.083 | 48.261 | 17.835 |
| ATOM | 1290 | HA   | LEU | 114 | 13.049 | 48.101 | 17.356 |
| ATOM | 1291 | CB   | LEU | 114 | 10.994 | 47.640 | 16.958 |
| ATOM | 1292 | HB2  | LEU | 114 | 10.091 | 47.722 | 17.564 |
| ATOM | 1293 | HB3  | LEU | 114 | 10.888 | 48.255 | 16.064 |
| ATOM | 1294 | CG   | LEU | 114 | 11.203 | 46.180 | 16.550 |
| ATOM | 1295 | HG   | LEU | 114 | 11.391 | 45.587 | 17.445 |
| ATOM | 1296 | CD1  | LEU | 114 | 9.974  | 45.641 | 15.834 |
| ATOM | 1297 | HD11 | LEU | 114 | 9.786  | 46.233 | 14.939 |
| ATOM | 1298 | HD12 | LEU | 114 | 10.143 | 44.602 | 15.553 |
| ATOM | 1299 | HD13 | LEU | 114 | 9.111  | 45.701 | 16.497 |
| ATOM | 1300 | CD2  | LEU | 114 | 12.434 | 46.039 | 15.668 |
| ATOM | 1301 | HD21 | LEU | 114 | 13.313 | 46.381 | 16.213 |
| ATOM | 1302 | HD22 | LEU | 114 | 12.564 | 44.993 | 15.389 |
| ATOM | 1303 | HD23 | LEU | 114 | 12.308 | 46.641 | 14.768 |
| ATOM | 1304 | C    | LEU | 114 | 11.889 | 49.742 | 17.928 |
| ATOM | 1305 | O    | LEU | 114 | 12.550 | 50.497 | 17.219 |
| ATOM | 1306 | N    | LEU | 115 | 10.968 | 50.199 | 18.796 |
| ATOM | 1307 | H    | LEU | 115 | 10.525 | 49.614 | 19.317 |
| ATOM | 1308 | CA   | LEU | 115 | 10.690 | 51.603 | 18.896 |
| ATOM | 1309 | HA   | LEU | 115 | 10.477 | 52.009 | 17.907 |
| ATOM | 1310 | CB   | LEU | 115 | 9.477  | 51.846 | 19.796 |
| ATOM | 1311 | HB2  | LEU | 115 | 9.715  | 51.301 | 20.709 |
| ATOM | 1312 | HB3  | LEU | 115 | 9.427  | 52.913 | 20.013 |
| ATOM | 1313 | CG   | LEU | 115 | 8.126  | 51.372 | 19.256 |
| ATOM | 1314 | HG   | LEU | 115 | 8.210  | 50.325 | 18.963 |
| ATOM | 1315 | CD1  | LEU | 115 | 7.044  | 51.516 | 20.315 |
| ATOM | 1316 | HD11 | LEU | 115 | 6.959  | 52.562 | 20.608 |
| ATOM | 1317 | HD12 | LEU | 115 | 6.091  | 51.174 | 19.911 |
| ATOM | 1318 | HD13 | LEU | 115 | 7.305  | 50.915 | 21.186 |
| ATOM | 1319 | CD2  | LEU | 115 | 7.747  | 52.147 | 18.003 |
| ATOM | 1320 | HD21 | LEU | 115 | 8.506  | 51.993 | 17.236 |
| ATOM | 1321 | HD22 | LEU | 115 | 6.783  | 51.795 | 17.635 |
| ATOM | 1322 | HD23 | LEU | 115 | 7.679  | 53.209 | 18.239 |
| ATOM | 1323 | C    | LEU | 115 | 11.912 | 52.292 | 19.423 |
| ATOM | 1324 | O    | LEU | 115 | 12.283 | 53.363 | 18.945 |
| ATOM | 1325 | N    | ARG | 116 | 12.575 | 51.689 | 20.426 |
| ATOM | 1326 | H    | ARG | 116 | 12.293 | 50.887 | 20.720 |
| ATOM | 1327 | CA   | ARG | 116 | 13.719 | 52.311 | 21.025 |
| ATOM | 1328 | HA   | ARG | 116 | 13.452 | 53.305 | 21.386 |
| ATOM | 1329 | CB   | ARG | 116 | 14.223 | 51.481 | 22.207 |
| ATOM | 1330 | HB2  | ARG | 116 | 14.375 | 50.464 | 21.844 |
| ATOM | 1331 | HB3  | ARG | 116 | 15.180 | 51.904 | 22.512 |
| ATOM | 1332 | CG   | ARG | 116 | 13.277 | 51.458 | 23.397 |
| ATOM | 1333 | HG2  | ARG | 116 | 12.280 | 51.197 | 23.043 |
| ATOM | 1334 | HG3  | ARG | 116 | 13.622 | 50.700 | 24.101 |
| ATOM | 1335 | CD   | ARG | 116 | 13.230 | 52.810 | 24.091 |
| ATOM | 1336 | HD2  | ARG | 116 | 14.241 | 53.093 | 24.384 |

|      |      |      |     |     |        |        |        |
|------|------|------|-----|-----|--------|--------|--------|
| ATOM | 1337 | HD3  | ARG | 116 | 12.832 | 53.552 | 23.399 |
| ATOM | 1338 | NE   | ARG | 116 | 12.387 | 52.783 | 25.284 |
| ATOM | 1339 | HE   | ARG | 116 | 12.097 | 52.015 | 25.543 |
| ATOM | 1340 | CZ   | ARG | 116 | 12.048 | 53.862 | 25.983 |
| ATOM | 1341 | NH1  | ARG | 116 | 11.277 | 53.741 | 27.055 |
| ATOM | 1342 | HH11 | ARG | 116 | 10.996 | 52.965 | 27.298 |
| ATOM | 1343 | HH12 | ARG | 116 | 11.057 | 54.439 | 27.507 |
| ATOM | 1344 | NH2  | ARG | 116 | 12.480 | 55.058 | 25.608 |
| ATOM | 1345 | HH21 | ARG | 116 | 12.980 | 55.136 | 24.913 |
| ATOM | 1346 | HH22 | ARG | 116 | 12.261 | 55.755 | 26.061 |
| ATOM | 1347 | C    | ARG | 116 | 14.782 | 52.475 | 19.987 |
| ATOM | 1348 | O    | ARG | 116 | 15.415 | 53.526 | 19.898 |
| ATOM | 1349 | N    | GLY | 117 | 14.999 | 51.435 | 19.162 |
| ATOM | 1350 | H    | GLY | 117 | 14.483 | 50.703 | 19.247 |
| ATOM | 1351 | CA   | GLY | 117 | 16.027 | 51.476 | 18.163 |
| ATOM | 1352 | HA2  | GLY | 117 | 16.990 | 51.679 | 18.632 |
| ATOM | 1353 | HA3  | GLY | 117 | 16.072 | 50.521 | 17.640 |
| ATOM | 1354 | C    | GLY | 117 | 15.729 | 52.560 | 17.173 |
| ATOM | 1355 | O    | GLY | 117 | 16.630 | 53.278 | 16.744 |
| ATOM | 1356 | N    | GLY | 118 | 14.449 | 52.697 | 16.774 |
| ATOM | 1357 | H    | GLY | 118 | 13.826 | 52.165 | 17.146 |
| ATOM | 1358 | CA   | GLY | 118 | 14.069 | 53.662 | 15.781 |
| ATOM | 1359 | HA2  | GLY | 118 | 14.646 | 53.496 | 14.872 |
| ATOM | 1360 | HA3  | GLY | 118 | 13.007 | 53.559 | 15.560 |
| ATOM | 1361 | C    | GLY | 118 | 14.331 | 55.052 | 16.278 |
| ATOM | 1362 | O    | GLY | 118 | 14.782 | 55.908 | 15.519 |
| ATOM | 1363 | N    | LEU | 119 | 14.020 | 55.318 | 17.562 |
| ATOM | 1364 | H    | LEU | 119 | 13.693 | 54.641 | 18.057 |
| ATOM | 1365 | CA   | LEU | 119 | 14.191 | 56.620 | 18.148 |
| ATOM | 1366 | HA   | LEU | 119 | 13.724 | 57.374 | 17.514 |
| ATOM | 1367 | CB   | LEU | 119 | 13.541 | 56.674 | 19.532 |
| ATOM | 1368 | HB2  | LEU | 119 | 13.962 | 55.814 | 20.052 |
| ATOM | 1369 | HB3  | LEU | 119 | 13.868 | 57.591 | 20.023 |
| ATOM | 1370 | CG   | LEU | 119 | 12.014 | 56.594 | 19.568 |
| ATOM | 1371 | HG   | LEU | 119 | 11.693 | 55.719 | 19.003 |
| ATOM | 1372 | CD1  | LEU | 119 | 11.515 | 56.483 | 21.000 |
| ATOM | 1373 | HD11 | LEU | 119 | 11.835 | 57.358 | 21.566 |
| ATOM | 1374 | HD12 | LEU | 119 | 10.426 | 56.427 | 21.003 |
| ATOM | 1375 | HD13 | LEU | 119 | 11.925 | 55.584 | 21.460 |
| ATOM | 1376 | CD2  | LEU | 119 | 11.396 | 57.804 | 18.884 |
| ATOM | 1377 | HD21 | LEU | 119 | 11.722 | 57.840 | 17.845 |
| ATOM | 1378 | HD22 | LEU | 119 | 10.309 | 57.727 | 18.921 |
| ATOM | 1379 | HD23 | LEU | 119 | 11.713 | 58.713 | 19.396 |
| ATOM | 1380 | C    | LEU | 119 | 15.646 | 56.953 | 18.233 |
| ATOM | 1381 | O    | LEU | 119 | 16.042 | 58.100 | 18.031 |
| ATOM | 1382 | N    | LEU | 120 | 16.485 | 55.955 | 18.565 |
| ATOM | 1383 | H    | LEU | 120 | 16.157 | 55.129 | 18.707 |
| ATOM | 1384 | CA   | LEU | 120 | 17.891 | 56.199 | 18.693 |
| ATOM | 1385 | HA   | LEU | 120 | 18.062 | 57.014 | 19.397 |
| ATOM | 1386 | CB   | LEU | 120 | 18.607 | 54.949 | 19.209 |
| ATOM | 1387 | HB2  | LEU | 120 | 18.161 | 54.777 | 20.188 |
| ATOM | 1388 | HB3  | LEU | 120 | 18.358 | 54.120 | 18.546 |

|      |      |      |     |     |        |        |        |
|------|------|------|-----|-----|--------|--------|--------|
| ATOM | 1389 | CG   | LEU | 120 | 20.127 | 55.049 | 19.352 |
| ATOM | 1390 | HG   | LEU | 120 | 20.558 | 55.289 | 18.380 |
| ATOM | 1391 | CD1  | LEU | 120 | 20.502 | 56.131 | 20.354 |
| ATOM | 1392 | HD11 | LEU | 120 | 20.072 | 55.891 | 21.326 |
| ATOM | 1393 | HD12 | LEU | 120 | 21.587 | 56.186 | 20.441 |
| ATOM | 1394 | HD13 | LEU | 120 | 20.116 | 57.092 | 20.013 |
| ATOM | 1395 | CD2  | LEU | 120 | 20.717 | 53.712 | 19.772 |
| ATOM | 1396 | HD21 | LEU | 120 | 20.483 | 52.959 | 19.020 |
| ATOM | 1397 | HD22 | LEU | 120 | 21.799 | 53.806 | 19.868 |
| ATOM | 1398 | HD23 | LEU | 120 | 20.293 | 53.412 | 20.730 |
| ATOM | 1399 | C    | LEU | 120 | 18.398 | 56.622 | 17.350 |
| ATOM | 1400 | O    | LEU | 120 | 19.130 | 57.603 | 17.236 |
| ATOM | 1401 | N    | GLY | 121 | 18.003 | 55.895 | 16.290 |
| ATOM | 1402 | H    | GLY | 121 | 17.428 | 55.217 | 16.430 |
| ATOM | 1403 | CA   | GLY | 121 | 18.474 | 56.175 | 14.961 |
| ATOM | 1404 | HA2  | GLY | 121 | 19.564 | 56.153 | 14.942 |
| ATOM | 1405 | HA3  | GLY | 121 | 18.084 | 55.431 | 14.266 |
| ATOM | 1406 | C    | GLY | 121 | 18.006 | 57.533 | 14.535 |
| ATOM | 1407 | O    | GLY | 121 | 18.732 | 58.266 | 13.866 |
| ATOM | 1408 | N    | LEU | 122 | 16.761 | 57.888 | 14.902 |
| ATOM | 1409 | H    | LEU | 122 | 16.308 | 57.312 | 15.424 |
| ATOM | 1410 | CA   | LEU | 122 | 16.151 | 59.123 | 14.497 |
| ATOM | 1411 | HA   | LEU | 122 | 16.183 | 59.212 | 13.411 |
| ATOM | 1412 | CB   | LEU | 122 | 14.690 | 59.172 | 14.949 |
| ATOM | 1413 | HB2  | LEU | 122 | 14.238 | 58.304 | 14.470 |
| ATOM | 1414 | HB3  | LEU | 122 | 14.667 | 59.042 | 16.031 |
| ATOM | 1415 | CG   | LEU | 122 | 13.906 | 60.430 | 14.570 |
| ATOM | 1416 | HG   | LEU | 122 | 14.395 | 61.297 | 15.013 |
| ATOM | 1417 | CD1  | LEU | 122 | 13.852 | 60.596 | 13.059 |
| ATOM | 1418 | HD11 | LEU | 122 | 13.362 | 59.729 | 12.615 |
| ATOM | 1419 | HD12 | LEU | 122 | 13.290 | 61.497 | 12.812 |
| ATOM | 1420 | HD13 | LEU | 122 | 14.865 | 60.681 | 12.666 |
| ATOM | 1421 | CD2  | LEU | 122 | 12.499 | 60.381 | 15.147 |
| ATOM | 1422 | HD21 | LEU | 122 | 12.553 | 60.314 | 16.234 |
| ATOM | 1423 | HD22 | LEU | 122 | 11.959 | 61.285 | 14.866 |
| ATOM | 1424 | HD23 | LEU | 122 | 11.975 | 59.509 | 14.756 |
| ATOM | 1425 | C    | LEU | 122 | 16.922 | 60.284 | 15.061 |
| ATOM | 1426 | O    | LEU | 122 | 17.184 | 61.258 | 14.357 |
| ATOM | 1427 | N    | GLY | 123 | 17.317 | 60.205 | 16.348 |
| ATOM | 1428 | H    | GLY | 123 | 17.156 | 59.442 | 16.797 |
| ATOM | 1429 | CA   | GLY | 123 | 17.980 | 61.300 | 17.006 |
| ATOM | 1430 | HA2  | GLY | 123 | 17.348 | 62.187 | 16.958 |
| ATOM | 1431 | HA3  | GLY | 123 | 18.161 | 61.039 | 18.049 |
| ATOM | 1432 | C    | GLY | 123 | 19.290 | 61.599 | 16.344 |
| ATOM | 1433 | O    | GLY | 123 | 19.643 | 62.764 | 16.167 |
| ATOM | 1434 | N    | LEU | 124 | 20.065 | 60.557 | 15.991 |
| ATOM | 1435 | H    | LEU | 124 | 19.788 | 59.717 | 16.155 |
| ATOM | 1436 | CA   | LEU | 124 | 21.333 | 60.784 | 15.354 |
| ATOM | 1437 | HA   | LEU | 124 | 21.921 | 61.488 | 15.942 |
| ATOM | 1438 | CB   | LEU | 124 | 22.115 | 59.474 | 15.235 |
| ATOM | 1439 | HB2  | LEU | 124 | 21.413 | 58.792 | 14.757 |
| ATOM | 1440 | HB3  | LEU | 124 | 22.962 | 59.647 | 14.571 |

|      |      |      |     |     |        |        |        |
|------|------|------|-----|-----|--------|--------|--------|
| ATOM | 1441 | CG   | LEU | 124 | 22.611 | 58.859 | 16.545 |
| ATOM | 1442 | HG   | LEU | 124 | 21.770 | 58.769 | 17.233 |
| ATOM | 1443 | CD1  | LEU | 124 | 23.214 | 57.485 | 16.299 |
| ATOM | 1444 | HD11 | LEU | 124 | 24.055 | 57.575 | 15.611 |
| ATOM | 1445 | HD12 | LEU | 124 | 23.561 | 57.065 | 17.243 |
| ATOM | 1446 | HD13 | LEU | 124 | 22.459 | 56.829 | 15.866 |
| ATOM | 1447 | CD2  | LEU | 124 | 23.628 | 59.771 | 17.215 |
| ATOM | 1448 | HD21 | LEU | 124 | 23.166 | 60.734 | 17.431 |
| ATOM | 1449 | HD22 | LEU | 124 | 23.968 | 59.315 | 18.145 |
| ATOM | 1450 | HD23 | LEU | 124 | 24.479 | 59.917 | 16.550 |
| ATOM | 1451 | C    | LEU | 124 | 21.103 | 61.401 | 14.007 |
| ATOM | 1452 | O    | LEU | 124 | 21.810 | 62.323 | 13.607 |
| ATOM | 1453 | N    | THR | 125 | 20.087 | 60.902 | 13.282 |
| ATOM | 1454 | H    | THR | 125 | 19.621 | 60.245 | 13.684 |
| ATOM | 1455 | CA   | THR | 125 | 19.720 | 61.339 | 11.961 |
| ATOM | 1456 | HA   | THR | 125 | 20.573 | 61.213 | 11.294 |
| ATOM | 1457 | CB   | THR | 125 | 18.536 | 60.526 | 11.406 |
| ATOM | 1458 | HB   | THR | 125 | 17.690 | 60.622 | 12.087 |
| ATOM | 1459 | CG2  | THR | 125 | 18.138 | 61.035 | 10.029 |
| ATOM | 1460 | HG21 | THR | 125 | 18.983 | 60.939 | 9.347  |
| ATOM | 1461 | HG22 | THR | 125 | 17.300 | 60.449 | 9.653  |
| ATOM | 1462 | HG23 | THR | 125 | 17.845 | 62.083 | 10.099 |
| ATOM | 1463 | OG1  | THR | 125 | 18.909 | 59.147 | 11.295 |
| ATOM | 1464 | HG1  | THR | 125 | 19.117 | 58.856 | 12.044 |
| ATOM | 1465 | C    | THR | 125 | 19.373 | 62.794 | 11.963 |
| ATOM | 1466 | O    | THR | 125 | 19.929 | 63.579 | 11.195 |
| ATOM | 1467 | N    | VAL | 126 | 18.449 | 63.188 | 12.853 |
| ATOM | 1468 | H    | VAL | 126 | 18.135 | 62.578 | 13.436 |
| ATOM | 1469 | CA   | VAL | 126 | 17.962 | 64.535 | 12.893 |
| ATOM | 1470 | HA   | VAL | 126 | 17.636 | 64.872 | 11.909 |
| ATOM | 1471 | CB   | VAL | 126 | 16.787 | 64.681 | 13.878 |
| ATOM | 1472 | HB   | VAL | 126 | 17.074 | 64.254 | 14.839 |
| ATOM | 1473 | CG1  | VAL | 126 | 16.427 | 66.147 | 14.063 |
| ATOM | 1474 | HG11 | VAL | 126 | 16.139 | 66.575 | 13.103 |
| ATOM | 1475 | HG12 | VAL | 126 | 15.595 | 66.232 | 14.762 |
| ATOM | 1476 | HG13 | VAL | 126 | 17.288 | 66.686 | 14.457 |
| ATOM | 1477 | CG2  | VAL | 126 | 15.583 | 63.890 | 13.392 |
| ATOM | 1478 | HG21 | VAL | 126 | 15.848 | 62.836 | 13.312 |
| ATOM | 1479 | HG22 | VAL | 126 | 14.762 | 64.005 | 14.100 |
| ATOM | 1480 | HG23 | VAL | 126 | 15.274 | 64.262 | 12.415 |
| ATOM | 1481 | C    | VAL | 126 | 19.072 | 65.466 | 13.262 |
| ATOM | 1482 | O    | VAL | 126 | 19.147 | 66.580 | 12.747 |
| ATOM | 1483 | N    | SER | 127 | 19.951 | 65.046 | 14.191 |
| ATOM | 1484 | H    | SER | 127 | 19.876 | 64.213 | 14.524 |
| ATOM | 1485 | CA   | SER | 127 | 21.001 | 65.911 | 14.651 |
| ATOM | 1486 | HA   | SER | 127 | 20.579 | 66.861 | 14.979 |
| ATOM | 1487 | CB   | SER | 127 | 21.744 | 65.274 | 15.827 |
| ATOM | 1488 | HB2  | SER | 127 | 22.500 | 65.974 | 16.183 |
| ATOM | 1489 | HB3  | SER | 127 | 21.029 | 65.075 | 16.625 |
| ATOM | 1490 | OG   | SER | 127 | 22.368 | 64.062 | 15.440 |
| ATOM | 1491 | HG   | SER | 127 | 21.791 | 63.529 | 15.169 |
| ATOM | 1492 | C    | SER | 127 | 21.974 | 66.238 | 13.553 |

|      |      |      |     |     |        |        |        |
|------|------|------|-----|-----|--------|--------|--------|
| ATOM | 1493 | O    | SER | 127 | 22.267 | 67.409 | 13.318 |
| ATOM | 1494 | N    | LEU | 128 | 22.491 | 65.219 | 12.837 |
| ATOM | 1495 | H    | LEU | 128 | 22.201 | 64.383 | 13.003 |
| ATOM | 1496 | CA   | LEU | 128 | 23.488 | 65.447 | 11.823 |
| ATOM | 1497 | HA   | LEU | 128 | 24.315 | 66.022 | 12.241 |
| ATOM | 1498 | CB   | LEU | 128 | 24.033 | 64.117 | 11.299 |
| ATOM | 1499 | HB2  | LEU | 128 | 23.138 | 63.550 | 11.043 |
| ATOM | 1500 | HB3  | LEU | 128 | 24.605 | 64.320 | 10.394 |
| ATOM | 1501 | CG   | LEU | 128 | 24.890 | 63.305 | 12.272 |
| ATOM | 1502 | HG   | LEU | 128 | 24.343 | 63.184 | 13.207 |
| ATOM | 1503 | CD1  | LEU | 128 | 25.211 | 61.936 | 11.692 |
| ATOM | 1504 | HD11 | LEU | 128 | 25.758 | 62.056 | 10.757 |
| ATOM | 1505 | HD12 | LEU | 128 | 25.821 | 61.375 | 12.400 |
| ATOM | 1506 | HD13 | LEU | 128 | 24.284 | 61.394 | 11.503 |
| ATOM | 1507 | CD2  | LEU | 128 | 26.172 | 64.050 | 12.611 |
| ATOM | 1508 | HD21 | LEU | 128 | 25.926 | 65.006 | 13.073 |
| ATOM | 1509 | HD22 | LEU | 128 | 26.766 | 63.455 | 13.304 |
| ATOM | 1510 | HD23 | LEU | 128 | 26.744 | 64.224 | 11.699 |
| ATOM | 1511 | C    | LEU | 128 | 22.930 | 66.257 | 10.692 |
| ATOM | 1512 | O    | LEU | 128 | 23.628 | 67.096 | 10.125 |
| ATOM | 1513 | N    | LEU | 129 | 21.664 | 66.005 | 10.313 |
| ATOM | 1514 | H    | LEU | 129 | 21.209 | 65.367 | 10.755 |
| ATOM | 1515 | CA   | LEU | 129 | 21.035 | 66.722 | 9.236  |
| ATOM | 1516 | HA   | LEU | 129 | 21.672 | 66.694 | 8.352  |
| ATOM | 1517 | CB   | LEU | 129 | 19.686 | 66.089 | 8.887  |
| ATOM | 1518 | HB2  | LEU | 129 | 19.936 | 65.059 | 8.633  |
| ATOM | 1519 | HB3  | LEU | 129 | 19.066 | 66.101 | 9.784  |
| ATOM | 1520 | CG   | LEU | 129 | 18.918 | 66.728 | 7.728  |
| ATOM | 1521 | HG   | LEU | 129 | 18.699 | 67.766 | 7.980  |
| ATOM | 1522 | CD1  | LEU | 129 | 19.738 | 66.680 | 6.448  |
| ATOM | 1523 | HD11 | LEU | 129 | 19.957 | 65.643 | 6.195  |
| ATOM | 1524 | HD12 | LEU | 129 | 19.173 | 67.140 | 5.637  |
| ATOM | 1525 | HD13 | LEU | 129 | 20.672 | 67.223 | 6.593  |
| ATOM | 1526 | CD2  | LEU | 129 | 17.579 | 66.035 | 7.524  |
| ATOM | 1527 | HD21 | LEU | 129 | 16.982 | 66.122 | 8.432  |
| ATOM | 1528 | HD22 | LEU | 129 | 17.049 | 66.504 | 6.695  |
| ATOM | 1529 | HD23 | LEU | 129 | 17.745 | 64.982 | 7.298  |
| ATOM | 1530 | C    | LEU | 129 | 20.875 | 68.160 | 9.639  |
| ATOM | 1531 | O    | LEU | 129 | 21.023 | 69.063 | 8.816  |
| ATOM | 1532 | N    | SER | 130 | 20.540 | 68.407 | 10.920 |
| ATOM | 1533 | H    | SER | 130 | 20.457 | 67.706 | 11.478 |
| ATOM | 1534 | CA   | SER | 130 | 20.317 | 69.741 | 11.404 |
| ATOM | 1535 | HA   | SER | 130 | 19.603 | 70.253 | 10.759 |
| ATOM | 1536 | CB   | SER | 130 | 19.755 | 69.708 | 12.826 |
| ATOM | 1537 | HB2  | SER | 130 | 18.816 | 69.155 | 12.817 |
| ATOM | 1538 | HB3  | SER | 130 | 20.470 | 69.198 | 13.472 |
| ATOM | 1539 | OG   | SER | 130 | 19.527 | 71.018 | 13.316 |
| ATOM | 1540 | HG   | SER | 130 | 20.243 | 71.438 | 13.323 |
| ATOM | 1541 | C    | SER | 130 | 21.601 | 70.515 | 11.354 |
| ATOM | 1542 | O    | SER | 130 | 21.598 | 71.704 | 11.038 |
| ATOM | 1543 | N    | HIE | 131 | 22.736 | 69.861 | 11.676 |
| ATOM | 1544 | H    | HIE | 131 | 22.679 | 68.999 | 11.928 |

|      |      |      |     |     |        |        |        |
|------|------|------|-----|-----|--------|--------|--------|
| ATOM | 1545 | CA   | HIE | 131 | 24.013 | 70.510 | 11.623 |
| ATOM | 1546 | HA   | HIE | 131 | 23.981 | 71.434 | 12.200 |
| ATOM | 1547 | CB   | HIE | 131 | 25.099 | 69.605 | 12.209 |
| ATOM | 1548 | HB2  | HIE | 131 | 25.024 | 68.604 | 11.784 |
| ATOM | 1549 | HB3  | HIE | 131 | 26.085 | 70.017 | 11.995 |
| ATOM | 1550 | CG   | HIE | 131 | 25.015 | 69.446 | 13.695 |
| ATOM | 1551 | ND1  | HIE | 131 | 24.174 | 68.537 | 14.300 |
| ATOM | 1552 | CE1  | HIE | 131 | 24.320 | 68.626 | 15.634 |
| ATOM | 1553 | HE1  | HIE | 131 | 23.713 | 67.961 | 16.248 |
| ATOM | 1554 | NE2  | HIE | 131 | 25.210 | 69.541 | 15.968 |
| ATOM | 1555 | HE2  | HIE | 131 | 25.470 | 69.771 | 16.830 |
| ATOM | 1556 | CD2  | HIE | 131 | 25.659 | 70.066 | 14.844 |
| ATOM | 1557 | HD2  | HIE | 131 | 26.412 | 70.854 | 14.873 |
| ATOM | 1558 | C    | HIE | 131 | 24.294 | 70.860 | 10.197 |
| ATOM | 1559 | O    | HIE | 131 | 24.861 | 71.909 | 9.898  |
| ATOM | 1560 | N    | CYS | 132 | 23.908 | 69.973 | 9.267  |
| ATOM | 1561 | H    | CYS | 132 | 23.505 | 69.212 | 9.529  |
| ATOM | 1562 | CA   | CYS | 132 | 24.130 | 70.224 | 7.873  |
| ATOM | 1563 | HA   | CYS | 132 | 25.190 | 70.401 | 7.694  |
| ATOM | 1564 | CB   | CYS | 132 | 23.687 | 69.023 | 7.035  |
| ATOM | 1565 | HB2  | CYS | 132 | 24.197 | 68.120 | 7.370  |
| ATOM | 1566 | HB3  | CYS | 132 | 22.609 | 68.882 | 7.116  |
| ATOM | 1567 | SG   | CYS | 132 | 24.041 | 69.173 | 5.268  |
| ATOM | 1568 | HG   | CYS | 132 | 23.530 | 67.994 | 4.923  |
| ATOM | 1569 | C    | CYS | 132 | 23.386 | 71.464 | 7.488  |
| ATOM | 1570 | O    | CYS | 132 | 23.890 | 72.301 | 6.740  |
| ATOM | 1571 | N    | LEU | 133 | 22.150 | 71.608 | 7.995  |
| ATOM | 1572 | H    | LEU | 133 | 21.849 | 70.979 | 8.564  |
| ATOM | 1573 | CA   | LEU | 133 | 21.317 | 72.723 | 7.654  |
| ATOM | 1574 | HA   | LEU | 133 | 21.270 | 72.831 | 6.570  |
| ATOM | 1575 | CB   | LEU | 133 | 19.898 | 72.514 | 8.187  |
| ATOM | 1576 | HB2  | LEU | 133 | 20.046 | 72.282 | 9.242  |
| ATOM | 1577 | HB3  | LEU | 133 | 19.360 | 73.458 | 8.095  |
| ATOM | 1578 | CG   | LEU | 133 | 19.085 | 71.398 | 7.529  |
| ATOM | 1579 | HG   | LEU | 133 | 19.667 | 70.477 | 7.552  |
| ATOM | 1580 | CD1  | LEU | 133 | 17.770 | 71.185 | 8.265  |
| ATOM | 1581 | HD11 | LEU | 133 | 17.187 | 72.106 | 8.242  |
| ATOM | 1582 | HD12 | LEU | 133 | 17.207 | 70.387 | 7.781  |
| ATOM | 1583 | HD13 | LEU | 133 | 17.973 | 70.910 | 9.300  |
| ATOM | 1584 | CD2  | LEU | 133 | 18.826 | 71.712 | 6.064  |
| ATOM | 1585 | HD21 | LEU | 133 | 19.776 | 71.811 | 5.539  |
| ATOM | 1586 | HD22 | LEU | 133 | 18.246 | 70.905 | 5.616  |
| ATOM | 1587 | HD23 | LEU | 133 | 18.269 | 72.646 | 5.985  |
| ATOM | 1588 | C    | LEU | 133 | 21.905 | 73.993 | 8.199  |
| ATOM | 1589 | O    | LEU | 133 | 21.874 | 75.028 | 7.534  |
| ATOM | 1590 | N    | VAL | 134 | 22.460 | 73.956 | 9.428  |
| ATOM | 1591 | H    | VAL | 134 | 22.495 | 73.180 | 9.882  |
| ATOM | 1592 | CA   | VAL | 134 | 22.994 | 75.152 | 10.011 |
| ATOM | 1593 | HA   | VAL | 134 | 22.268 | 75.965 | 9.992  |
| ATOM | 1594 | CB   | VAL | 134 | 23.436 | 74.921 | 11.468 |
| ATOM | 1595 | HB   | VAL | 134 | 24.085 | 74.046 | 11.507 |
| ATOM | 1596 | CG1  | VAL | 134 | 24.188 | 76.133 | 11.995 |

|      |      |      |     |     |        |        |        |
|------|------|------|-----|-----|--------|--------|--------|
| ATOM | 1597 | HG11 | VAL | 134 | 23.540 | 77.008 | 11.957 |
| ATOM | 1598 | HG12 | VAL | 134 | 24.493 | 75.952 | 13.026 |
| ATOM | 1599 | HG13 | VAL | 134 | 25.071 | 76.308 | 11.381 |
| ATOM | 1600 | CG2  | VAL | 134 | 22.234 | 74.612 | 12.347 |
| ATOM | 1601 | HG21 | VAL | 134 | 21.737 | 73.713 | 11.981 |
| ATOM | 1602 | HG22 | VAL | 134 | 22.565 | 74.452 | 13.373 |
| ATOM | 1603 | HG23 | VAL | 134 | 21.537 | 75.449 | 12.317 |
| ATOM | 1604 | C    | VAL | 134 | 24.142 | 75.643 | 9.181  |
| ATOM | 1605 | O    | VAL | 134 | 24.288 | 76.845 | 8.968  |
| ATOM | 1606 | N    | ALA | 135 | 24.990 | 74.722 | 8.684  |
| ATOM | 1607 | H    | ALA | 135 | 24.820 | 73.851 | 8.837  |
| ATOM | 1608 | CA   | ALA | 135 | 26.145 | 75.105 | 7.924  |
| ATOM | 1609 | HA   | ALA | 135 | 26.759 | 75.790 | 8.509  |
| ATOM | 1610 | CB   | ALA | 135 | 26.980 | 73.882 | 7.575  |
| ATOM | 1611 | HB1  | ALA | 135 | 26.382 | 73.190 | 6.982  |
| ATOM | 1612 | HB2  | ALA | 135 | 27.854 | 74.190 | 7.001  |
| ATOM | 1613 | HB3  | ALA | 135 | 27.303 | 73.388 | 8.492  |
| ATOM | 1614 | C    | ALA | 135 | 25.726 | 75.831 | 6.683  |
| ATOM | 1615 | O    | ALA | 135 | 26.297 | 76.871 | 6.356  |
| ATOM | 1616 | N    | LEU | 136 | 24.718 | 75.309 | 5.957  |
| ATOM | 1617 | H    | LEU | 136 | 24.309 | 74.556 | 6.232  |
| ATOM | 1618 | CA   | LEU | 136 | 24.295 | 75.954 | 4.743  |
| ATOM | 1619 | HA   | LEU | 136 | 25.159 | 76.147 | 4.107  |
| ATOM | 1620 | CB   | LEU | 136 | 23.313 | 75.064 | 3.978  |
| ATOM | 1621 | HB2  | LEU | 136 | 22.557 | 74.811 | 4.721  |
| ATOM | 1622 | HB3  | LEU | 136 | 22.860 | 75.663 | 3.188  |
| ATOM | 1623 | CG   | LEU | 136 | 23.888 | 73.779 | 3.378  |
| ATOM | 1624 | HG   | LEU | 136 | 24.411 | 73.228 | 4.160  |
| ATOM | 1625 | CD1  | LEU | 136 | 22.780 | 72.912 | 2.802  |
| ATOM | 1626 | HD11 | LEU | 136 | 22.257 | 73.462 | 2.020  |
| ATOM | 1627 | HD12 | LEU | 136 | 23.211 | 72.004 | 2.381  |
| ATOM | 1628 | HD13 | LEU | 136 | 22.077 | 72.648 | 3.592  |
| ATOM | 1629 | CD2  | LEU | 136 | 24.920 | 74.100 | 2.308  |
| ATOM | 1630 | HD21 | LEU | 136 | 25.733 | 74.677 | 2.748  |
| ATOM | 1631 | HD22 | LEU | 136 | 25.316 | 73.172 | 1.895  |
| ATOM | 1632 | HD23 | LEU | 136 | 24.452 | 74.681 | 1.513  |
| ATOM | 1633 | C    | LEU | 136 | 23.667 | 77.288 | 5.035  |
| ATOM | 1634 | O    | LEU | 136 | 23.896 | 78.258 | 4.314  |
| ATOM | 1635 | N    | ASN | 137 | 22.866 | 77.389 | 6.111  |
| ATOM | 1636 | H    | ASN | 137 | 22.752 | 76.668 | 6.638  |
| ATOM | 1637 | CA   | ASN | 137 | 22.197 | 78.622 | 6.426  |
| ATOM | 1638 | HA   | ASN | 137 | 21.603 | 78.948 | 5.572  |
| ATOM | 1639 | CB   | ASN | 137 | 21.267 | 78.435 | 7.626  |
| ATOM | 1640 | HB2  | ASN | 137 | 20.578 | 77.618 | 7.412  |
| ATOM | 1641 | HB3  | ASN | 137 | 21.869 | 78.183 | 8.499  |
| ATOM | 1642 | CG   | ASN | 137 | 20.460 | 79.681 | 7.937  |
| ATOM | 1643 | OD1  | ASN | 137 | 19.659 | 80.133 | 7.119  |
| ATOM | 1644 | ND2  | ASN | 137 | 20.669 | 80.239 | 9.124  |
| ATOM | 1645 | HD21 | ASN | 137 | 20.216 | 80.980 | 9.359  |
| ATOM | 1646 | HD22 | ASN | 137 | 21.264 | 79.876 | 9.693  |
| ATOM | 1647 | C    | ASN | 137 | 23.207 | 79.705 | 6.684  |
| ATOM | 1648 | O    | ASN | 137 | 23.096 | 80.818 | 6.171  |

|      |      |      |     |     |        |        |        |
|------|------|------|-----|-----|--------|--------|--------|
| ATOM | 1649 | N    | ARG | 138 | 24.230 | 79.385 | 7.491  |
| ATOM | 1650 | H    | ARG | 138 | 24.285 | 78.533 | 7.776  |
| ATOM | 1651 | CA   | ARG | 138 | 25.215 | 80.343 | 7.902  |
| ATOM | 1652 | HA   | ARG | 138 | 24.723 | 81.231 | 8.299  |
| ATOM | 1653 | CB   | ARG | 138 | 26.114 | 79.754 | 8.991  |
| ATOM | 1654 | HB2  | ARG | 138 | 25.548 | 78.961 | 9.480  |
| ATOM | 1655 | HB3  | ARG | 138 | 26.983 | 79.325 | 8.493  |
| ATOM | 1656 | CG   | ARG | 138 | 26.573 | 80.764 | 10.030 |
| ATOM | 1657 | HG2  | ARG | 138 | 27.316 | 80.289 | 10.671 |
| ATOM | 1658 | HG3  | ARG | 138 | 27.027 | 81.611 | 9.515  |
| ATOM | 1659 | CD   | ARG | 138 | 25.409 | 81.252 | 10.878 |
| ATOM | 1660 | HD2  | ARG | 138 | 24.801 | 80.396 | 11.173 |
| ATOM | 1661 | HD3  | ARG | 138 | 25.800 | 81.743 | 11.769 |
| ATOM | 1662 | NE   | ARG | 138 | 24.564 | 82.199 | 10.154 |
| ATOM | 1663 | HE   | ARG | 138 | 24.948 | 82.695 | 9.564  |
| ATOM | 1664 | CZ   | ARG | 138 | 23.257 | 82.336 | 10.351 |
| ATOM | 1665 | NH1  | ARG | 138 | 22.570 | 83.224 | 9.646  |
| ATOM | 1666 | HH11 | ARG | 138 | 22.970 | 83.711 | 9.061  |
| ATOM | 1667 | HH12 | ARG | 138 | 21.724 | 83.313 | 9.774  |
| ATOM | 1668 | NH2  | ARG | 138 | 22.640 | 81.586 | 11.254 |
| ATOM | 1669 | HH21 | ARG | 138 | 23.086 | 81.010 | 11.711 |
| ATOM | 1670 | HH22 | ARG | 138 | 21.795 | 81.675 | 11.382 |
| ATOM | 1671 | C    | ARG | 138 | 25.997 | 80.743 | 6.691  |
| ATOM | 1672 | O    | ARG | 138 | 26.494 | 81.863 | 6.581  |
| ATOM | 1673 | N    | TYR | 139 | 26.117 | 79.803 | 5.742  |
| ATOM | 1674 | H    | TYR | 139 | 25.716 | 79.021 | 5.937  |
| ATOM | 1675 | CA   | TYR | 139 | 26.811 | 79.962 | 4.499  |
| ATOM | 1676 | HA   | TYR | 139 | 27.861 | 80.185 | 4.688  |
| ATOM | 1677 | CB   | TYR | 139 | 26.726 | 78.679 | 3.670  |
| ATOM | 1678 | HB2  | TYR | 139 | 27.119 | 77.870 | 4.286  |
| ATOM | 1679 | HB3  | TYR | 139 | 25.671 | 78.497 | 3.463  |
| ATOM | 1680 | CG   | TYR | 139 | 27.492 | 78.739 | 2.368  |
| ATOM | 1681 | CD1  | TYR | 139 | 27.146 | 79.654 | 1.381  |
| ATOM | 1682 | HD1  | TYR | 139 | 26.310 | 80.330 | 1.561  |
| ATOM | 1683 | CE1  | TYR | 139 | 27.841 | 79.716 | 0.188  |
| ATOM | 1684 | HE1  | TYR | 139 | 27.558 | 80.439 | -0.577 |
| ATOM | 1685 | CZ   | TYR | 139 | 28.895 | 78.857 | -0.032 |
| ATOM | 1686 | OH   | TYR | 139 | 29.588 | 78.917 | -1.219 |
| ATOM | 1687 | HH   | TYR | 139 | 29.262 | 79.511 | -1.699 |
| ATOM | 1688 | CE2  | TYR | 139 | 29.263 | 77.929 | 0.942  |
| ATOM | 1689 | HE2  | TYR | 139 | 30.096 | 77.246 | 0.775  |
| ATOM | 1690 | CD2  | TYR | 139 | 28.558 | 77.881 | 2.129  |
| ATOM | 1691 | HD2  | TYR | 139 | 28.835 | 77.161 | 2.899  |
| ATOM | 1692 | C    | TYR | 139 | 26.164 | 81.141 | 3.829  |
| ATOM | 1693 | O    | TYR | 139 | 26.828 | 82.024 | 3.289  |
| ATOM | 1694 | N    | LEU | 140 | 24.822 | 81.186 | 3.842  |
| ATOM | 1695 | H    | LEU | 140 | 24.355 | 80.523 | 4.232  |
| ATOM | 1696 | CA   | LEU | 140 | 24.131 | 82.290 | 3.234  |
| ATOM | 1697 | HA   | LEU | 140 | 24.489 | 82.433 | 2.214  |
| ATOM | 1698 | CB   | LEU | 140 | 22.625 | 82.022 | 3.191  |
| ATOM | 1699 | HB2  | LEU | 140 | 22.376 | 81.760 | 4.219  |
| ATOM | 1700 | HB3  | LEU | 140 | 22.124 | 82.952 | 2.922  |



|      |      |      |     |     |        |        |        |
|------|------|------|-----|-----|--------|--------|--------|
| ATOM | 1701 | CG   | LEU | 140 | 22.162 | 80.904 | 2.254  |
| ATOM | 1702 | HG   | LEU | 140 | 22.730 | 80.000 | 2.475  |
| ATOM | 1703 | CD1  | LEU | 140 | 20.678 | 80.628 | 2.439  |
| ATOM | 1704 | HD11 | LEU | 140 | 20.110 | 81.531 | 2.217  |
| ATOM | 1705 | HD12 | LEU | 140 | 20.369 | 79.830 | 1.764  |
| ATOM | 1706 | HD13 | LEU | 140 | 20.490 | 80.325 | 3.469  |
| ATOM | 1707 | CD2  | LEU | 140 | 22.458 | 81.260 | 0.805  |
| ATOM | 1708 | HD21 | LEU | 140 | 23.531 | 81.404 | 0.678  |
| ATOM | 1709 | HD22 | LEU | 140 | 22.121 | 80.452 | 0.156  |
| ATOM | 1710 | HD23 | LEU | 140 | 21.935 | 82.179 | 0.542  |
| ATOM | 1711 | C    | LEU | 140 | 24.424 | 83.553 | 3.988  |
| ATOM | 1712 | O    | LEU | 140 | 24.702 | 84.600 | 3.403  |
| ATOM | 1713 | N    | LEU | 141 | 24.367 | 83.467 | 5.328  |
| ATOM | 1714 | H    | LEU | 141 | 24.302 | 82.644 | 5.686  |
| ATOM | 1715 | CA   | LEU | 141 | 24.406 | 84.621 | 6.182  |
| ATOM | 1716 | HA   | LEU | 141 | 23.623 | 85.322 | 5.892  |
| ATOM | 1717 | CB   | LEU | 141 | 24.184 | 84.216 | 7.641  |
| ATOM | 1718 | HB2  | LEU | 141 | 23.207 | 83.733 | 7.633  |
| ATOM | 1719 | HB3  | LEU | 141 | 24.948 | 83.486 | 7.908  |
| ATOM | 1720 | CG   | LEU | 141 | 24.183 | 85.351 | 8.667  |
| ATOM | 1721 | HG   | LEU | 141 | 25.147 | 85.859 | 8.632  |
| ATOM | 1722 | CD1  | LEU | 141 | 23.074 | 86.347 | 8.365  |
| ATOM | 1723 | HD11 | LEU | 141 | 22.110 | 85.840 | 8.400  |
| ATOM | 1724 | HD12 | LEU | 141 | 23.091 | 87.146 | 9.106  |
| ATOM | 1725 | HD13 | LEU | 141 | 23.225 | 86.770 | 7.372  |
| ATOM | 1726 | CD2  | LEU | 141 | 24.031 | 84.801 | 10.077 |
| ATOM | 1727 | HD21 | LEU | 141 | 24.860 | 84.129 | 10.297 |
| ATOM | 1728 | HD22 | LEU | 141 | 24.033 | 85.625 | 10.791 |
| ATOM | 1729 | HD23 | LEU | 141 | 23.091 | 84.255 | 10.155 |
| ATOM | 1730 | C    | LEU | 141 | 25.666 | 85.417 | 6.115  |
| ATOM | 1731 | O    | LEU | 141 | 25.601 | 86.641 | 6.020  |
| ATOM | 1732 | N    | ILE | 142 | 26.840 | 84.764 | 6.117  |
| ATOM | 1733 | H    | ILE | 142 | 26.908 | 83.876 | 5.987  |
| ATOM | 1734 | CA   | ILE | 142 | 28.021 | 85.549 | 6.339  |
| ATOM | 1735 | HA   | ILE | 142 | 27.942 | 86.156 | 7.241  |
| ATOM | 1736 | CB   | ILE | 142 | 29.279 | 84.664 | 6.425  |
| ATOM | 1737 | HB   | ILE | 142 | 29.273 | 83.957 | 5.596  |
| ATOM | 1738 | CG2  | ILE | 142 | 30.536 | 85.518 | 6.353  |
| ATOM | 1739 | HG21 | ILE | 142 | 30.543 | 86.225 | 7.182  |
| ATOM | 1740 | HG22 | ILE | 142 | 31.415 | 84.877 | 6.415  |
| ATOM | 1741 | HG23 | ILE | 142 | 30.551 | 86.064 | 5.410  |
| ATOM | 1742 | CG1  | ILE | 142 | 29.242 | 83.808 | 7.693  |
| ATOM | 1743 | HG12 | ILE | 142 | 29.395 | 84.476 | 8.540  |
| ATOM | 1744 | HG13 | ILE | 142 | 28.248 | 83.364 | 7.756  |
| ATOM | 1745 | CD1  | ILE | 142 | 30.286 | 82.713 | 7.720  |
| ATOM | 1746 | HD11 | ILE | 142 | 31.280 | 83.156 | 7.658  |
| ATOM | 1747 | HD12 | ILE | 142 | 30.198 | 82.149 | 8.649  |
| ATOM | 1748 | HD13 | ILE | 142 | 30.133 | 82.044 | 6.873  |
| ATOM | 1749 | C    | ILE | 142 | 28.242 | 86.585 | 5.301  |
| ATOM | 1750 | O    | ILE | 142 | 28.664 | 87.691 | 5.633  |
| ATOM | 1751 | N    | THR | 143 | 28.009 | 86.290 | 4.014  |
| ATOM | 1752 | H    | THR | 143 | 27.636 | 85.549 | 3.666  |

|      |      |      |     |     |        |        |        |
|------|------|------|-----|-----|--------|--------|--------|
| ATOM | 1753 | CA   | THR | 143 | 28.440 | 87.345 | 3.153  |
| ATOM | 1754 | HA   | THR | 143 | 28.188 | 88.302 | 3.609  |
| ATOM | 1755 | CB   | THR | 143 | 29.961 | 87.297 | 2.919  |
| ATOM | 1756 | HB   | THR | 143 | 30.467 | 87.257 | 3.884  |
| ATOM | 1757 | CG2  | THR | 143 | 30.336 | 86.072 | 2.099  |
| ATOM | 1758 | HG21 | THR | 143 | 29.831 | 86.112 | 1.134  |
| ATOM | 1759 | HG22 | THR | 143 | 31.415 | 86.055 | 1.943  |
| ATOM | 1760 | HG23 | THR | 143 | 30.032 | 85.171 | 2.631  |
| ATOM | 1761 | OG1  | THR | 143 | 30.376 | 88.469 | 2.207  |
| ATOM | 1762 | HG1  | THR | 143 | 30.186 | 89.144 | 2.652  |
| ATOM | 1763 | C    | THR | 143 | 27.701 | 87.193 | 1.926  |
| ATOM | 1764 | O    | THR | 143 | 27.535 | 88.175 | 1.201  |
| ATOM | 1765 | N    | ARG | 144 | 27.365 | 85.911 | 1.653  |
| ATOM | 1766 | H    | ARG | 144 | 27.513 | 85.231 | 2.224  |
| ATOM | 1767 | CA   | ARG | 144 | 26.754 | 85.663 | 0.401  |
| ATOM | 1768 | HA   | ARG | 144 | 27.437 | 85.936 | -0.404 |
| ATOM | 1769 | CB   | ARG | 144 | 26.402 | 84.181 | 0.261  |
| ATOM | 1770 | HB2  | ARG | 144 | 27.329 | 83.619 | 0.375  |
| ATOM | 1771 | HB3  | ARG | 144 | 25.725 | 83.933 | 1.078  |
| ATOM | 1772 | CG   | ARG | 144 | 25.750 | 83.820 | -1.064 |
| ATOM | 1773 | HG2  | ARG | 144 | 24.809 | 84.363 | -1.147 |
| ATOM | 1774 | HG3  | ARG | 144 | 26.416 | 84.122 | -1.872 |
| ATOM | 1775 | CD   | ARG | 144 | 25.483 | 82.327 | -1.160 |
| ATOM | 1776 | HD2  | ARG | 144 | 26.432 | 81.792 | -1.124 |
| ATOM | 1777 | HD3  | ARG | 144 | 24.864 | 82.024 | -0.316 |
| ATOM | 1778 | NE   | ARG | 144 | 24.793 | 81.973 | -2.398 |
| ATOM | 1779 | HE   | ARG | 144 | 24.615 | 82.613 | -2.945 |
| ATOM | 1780 | CZ   | ARG | 144 | 24.428 | 80.736 | -2.722 |
| ATOM | 1781 | NH1  | ARG | 144 | 23.804 | 80.509 | -3.870 |
| ATOM | 1782 | HH11 | ARG | 144 | 23.635 | 81.161 | -4.404 |
| ATOM | 1783 | HH12 | ARG | 144 | 23.568 | 79.709 | -4.080 |
| ATOM | 1784 | NH2  | ARG | 144 | 24.688 | 79.731 | -1.898 |
| ATOM | 1785 | HH21 | ARG | 144 | 25.093 | 79.878 | -1.154 |
| ATOM | 1786 | HH22 | ARG | 144 | 24.452 | 78.931 | -2.108 |
| ATOM | 1787 | C    | ARG | 144 | 25.566 | 86.558 | 0.375  |
| ATOM | 1788 | O    | ARG | 144 | 25.397 | 87.325 | -0.570 |
| ATOM | 1789 | N    | ALA | 145 | 24.751 | 86.553 | 1.442  |
| ATOM | 1790 | H    | ALA | 145 | 24.778 | 85.944 | 2.104  |
| ATOM | 1791 | CA   | ALA | 145 | 23.791 | 87.611 | 1.483  |
| ATOM | 1792 | HA   | ALA | 145 | 24.176 | 88.520 | 1.022  |
| ATOM | 1793 | CB   | ALA | 145 | 22.518 | 87.200 | 0.759  |
| ATOM | 1794 | HB1  | ALA | 145 | 22.116 | 86.296 | 1.216  |
| ATOM | 1795 | HB2  | ALA | 145 | 21.783 | 88.001 | 0.832  |
| ATOM | 1796 | HB3  | ALA | 145 | 22.742 | 87.008 | -0.290 |
| ATOM | 1797 | C    | ALA | 145 | 23.540 | 87.934 | 2.920  |
| ATOM | 1798 | O    | ALA | 145 | 22.657 | 87.347 | 3.542  |
| ATOM | 1799 | N    | PRO | 146 | 24.284 | 88.836 | 3.491  |
| ATOM | 1800 | CD   | PRO | 146 | 25.712 | 89.243 | 3.038  |
| ATOM | 1801 | HD2  | PRO | 146 | 25.678 | 90.102 | 2.368  |
| ATOM | 1802 | HD3  | PRO | 146 | 26.213 | 88.414 | 2.539  |
| ATOM | 1803 | CG   | PRO | 146 | 26.333 | 89.571 | 4.366  |
| ATOM | 1804 | HG2  | PRO | 146 | 27.109 | 90.324 | 4.228  |

|      |      |      |     |     |        |        |        |
|------|------|------|-----|-----|--------|--------|--------|
| ATOM | 1805 | HG3  | PRO | 146 | 26.774 | 88.670 | 4.793  |
| ATOM | 1806 | CB   | PRO | 146 | 25.226 | 90.081 | 5.226  |
| ATOM | 1807 | HB2  | PRO | 146 | 25.042 | 91.122 | 4.962  |
| ATOM | 1808 | HB3  | PRO | 146 | 25.410 | 90.005 | 6.298  |
| ATOM | 1809 | CA   | PRO | 146 | 24.017 | 89.226 | 4.842  |
| ATOM | 1810 | HA   | PRO | 146 | 23.938 | 88.331 | 5.459  |
| ATOM | 1811 | C    | PRO | 146 | 22.745 | 90.000 | 4.925  |
| ATOM | 1812 | O    | PRO | 146 | 21.914 | 89.711 | 5.785  |
| ATOM | 1813 | N    | ALA | 147 | 22.586 | 90.998 | 4.036  |
| ATOM | 1814 | H    | ALA | 147 | 23.245 | 91.140 | 3.440  |
| ATOM | 1815 | CA   | ALA | 147 | 21.416 | 91.822 | 4.018  |
| ATOM | 1816 | HA   | ALA | 147 | 21.181 | 92.162 | 5.026  |
| ATOM | 1817 | CB   | ALA | 147 | 21.639 | 93.040 | 3.134  |
| ATOM | 1818 | HB1  | ALA | 147 | 21.867 | 92.716 | 2.119  |
| ATOM | 1819 | HB2  | ALA | 147 | 20.738 | 93.653 | 3.125  |
| ATOM | 1820 | HB3  | ALA | 147 | 22.472 | 93.625 | 3.524  |
| ATOM | 1821 | C    | ALA | 147 | 20.250 | 91.020 | 3.541  |
| ATOM | 1822 | O    | ALA | 147 | 19.163 | 91.072 | 4.115  |
| ATOM | 1823 | N    | THR | 148 | 20.476 | 90.233 | 2.473  |
| ATOM | 1824 | H    | THR | 148 | 21.321 | 90.188 | 2.167  |
| ATOM | 1825 | CA   | THR | 148 | 19.439 | 89.485 | 1.827  |
| ATOM | 1826 | HA   | THR | 148 | 18.615 | 90.156 | 1.585  |
| ATOM | 1827 | CB   | THR | 148 | 19.941 | 88.833 | 0.525  |
| ATOM | 1828 | HB   | THR | 148 | 20.777 | 88.173 | 0.758  |
| ATOM | 1829 | CG2  | THR | 148 | 18.828 | 88.029 | -0.131 |
| ATOM | 1830 | HG21 | THR | 148 | 17.992 | 88.688 | -0.365 |
| ATOM | 1831 | HG22 | THR | 148 | 19.200 | 87.575 | -1.050 |
| ATOM | 1832 | HG23 | THR | 148 | 18.494 | 87.247 | 0.551  |
| ATOM | 1833 | OG1  | THR | 148 | 20.370 | 89.851 | -0.388 |
| ATOM | 1834 | HG1  | THR | 148 | 20.986 | 90.288 | -0.043 |
| ATOM | 1835 | C    | THR | 148 | 18.930 | 88.447 | 2.770  |
| ATOM | 1836 | O    | THR | 148 | 17.728 | 88.199 | 2.856  |
| ATOM | 1837 | N    | TYR | 149 | 19.850 | 87.830 | 3.528  |
| ATOM | 1838 | H    | TYR | 149 | 20.705 | 88.103 | 3.464  |
| ATOM | 1839 | CA   | TYR | 149 | 19.503 | 86.766 | 4.420  |
| ATOM | 1840 | HA   | TYR | 149 | 19.037 | 85.954 | 3.862  |
| ATOM | 1841 | CB   | TYR | 149 | 20.751 | 86.225 | 5.120  |
| ATOM | 1842 | HB2  | TYR | 149 | 21.416 | 85.843 | 4.345  |
| ATOM | 1843 | HB3  | TYR | 149 | 21.228 | 87.065 | 5.625  |
| ATOM | 1844 | CG   | TYR | 149 | 20.465 | 85.130 | 6.123  |
| ATOM | 1845 | CD1  | TYR | 149 | 20.646 | 83.794 | 5.787  |
| ATOM | 1846 | HD1  | TYR | 149 | 20.999 | 83.547 | 4.786  |
| ATOM | 1847 | CE1  | TYR | 149 | 20.387 | 82.786 | 6.697  |
| ATOM | 1848 | HE1  | TYR | 149 | 20.534 | 81.742 | 6.420  |
| ATOM | 1849 | CZ   | TYR | 149 | 19.942 | 83.108 | 7.961  |
| ATOM | 1850 | OH   | TYR | 149 | 19.683 | 82.106 | 8.868  |
| ATOM | 1851 | HH   | TYR | 149 | 19.424 | 82.441 | 9.582  |
| ATOM | 1852 | CE2  | TYR | 149 | 19.752 | 84.441 | 8.323  |
| ATOM | 1853 | HE2  | TYR | 149 | 19.400 | 84.703 | 9.321  |
| ATOM | 1854 | CD2  | TYR | 149 | 20.015 | 85.435 | 7.401  |
| ATOM | 1855 | HD2  | TYR | 149 | 19.870 | 86.481 | 7.671  |
| ATOM | 1856 | C    | TYR | 149 | 18.505 | 87.283 | 5.400  |

|      |      |      |     |     |        |        |        |
|------|------|------|-----|-----|--------|--------|--------|
| ATOM | 1857 | O    | TYR | 149 | 17.485 | 86.644 | 5.653  |
| ATOM | 1858 | N    | GLN | 150 | 18.757 | 88.481 | 5.953  |
| ATOM | 1859 | H    | GLN | 150 | 19.480 | 88.951 | 5.696  |
| ATOM | 1860 | CA   | GLN | 150 | 17.877 | 89.010 | 6.949  |
| ATOM | 1861 | HA   | GLN | 150 | 17.786 | 88.304 | 7.774  |
| ATOM | 1862 | CB   | GLN | 150 | 18.419 | 90.333 | 7.495  |
| ATOM | 1863 | HB2  | GLN | 150 | 18.638 | 90.969 | 6.637  |
| ATOM | 1864 | HB3  | GLN | 150 | 17.624 | 90.785 | 8.088  |
| ATOM | 1865 | CG   | GLN | 150 | 19.667 | 90.187 | 8.349  |
| ATOM | 1866 | HG2  | GLN | 150 | 19.417 | 89.613 | 9.241  |
| ATOM | 1867 | HG3  | GLN | 150 | 20.423 | 89.652 | 7.774  |
| ATOM | 1868 | CD   | GLN | 150 | 20.240 | 91.523 | 8.777  |
| ATOM | 1869 | OE1  | GLN | 150 | 19.909 | 92.563 | 8.206  |
| ATOM | 1870 | NE2  | GLN | 150 | 21.102 | 91.500 | 9.787  |
| ATOM | 1871 | HE21 | GLN | 150 | 21.472 | 92.267 | 10.081 |
| ATOM | 1872 | HE22 | GLN | 150 | 21.317 | 90.718 | 10.177 |
| ATOM | 1873 | C    | GLN | 150 | 16.512 | 89.194 | 6.371  |
| ATOM | 1874 | O    | GLN | 150 | 15.517 | 88.830 | 6.994  |
| ATOM | 1875 | N    | ALA | 151 | 16.421 | 89.771 | 5.161  |
| ATOM | 1876 | H    | ALA | 151 | 17.158 | 89.982 | 4.690  |
| ATOM | 1877 | CA   | ALA | 151 | 15.122 | 90.050 | 4.623  |
| ATOM | 1878 | HA   | ALA | 151 | 14.561 | 90.620 | 5.363  |
| ATOM | 1879 | CB   | ALA | 151 | 15.241 | 90.883 | 3.356  |
| ATOM | 1880 | HB1  | ALA | 151 | 15.793 | 90.322 | 2.602  |
| ATOM | 1881 | HB2  | ALA | 151 | 14.245 | 91.115 | 2.978  |
| ATOM | 1882 | HB3  | ALA | 151 | 15.770 | 91.810 | 3.578  |
| ATOM | 1883 | C    | ALA | 151 | 14.352 | 88.794 | 4.332  |
| ATOM | 1884 | O    | ALA | 151 | 13.186 | 88.684 | 4.707  |
| ATOM | 1885 | N    | LEU | 152 | 14.982 | 87.817 | 3.647  |
| ATOM | 1886 | H    | LEU | 152 | 15.860 | 87.910 | 3.474  |
| ATOM | 1887 | CA   | LEU | 152 | 14.279 | 86.643 | 3.195  |
| ATOM | 1888 | HA   | LEU | 152 | 13.336 | 86.933 | 2.732  |
| ATOM | 1889 | CB   | LEU | 152 | 15.115 | 85.881 | 2.165  |
| ATOM | 1890 | HB2  | LEU | 152 | 15.255 | 86.600 | 1.357  |
| ATOM | 1891 | HB3  | LEU | 152 | 16.080 | 85.652 | 2.617  |
| ATOM | 1892 | CG   | LEU | 152 | 14.497 | 84.599 | 1.605  |
| ATOM | 1893 | HG   | LEU | 152 | 14.318 | 83.906 | 2.427  |
| ATOM | 1894 | CD1  | LEU | 152 | 13.183 | 84.898 | 0.899  |
| ATOM | 1895 | HD11 | LEU | 152 | 13.361 | 85.591 | 0.077  |
| ATOM | 1896 | HD12 | LEU | 152 | 12.761 | 83.972 | 0.508  |
| ATOM | 1897 | HD13 | LEU | 152 | 12.484 | 85.346 | 1.605  |
| ATOM | 1898 | CD2  | LEU | 152 | 15.462 | 83.907 | 0.654  |
| ATOM | 1899 | HD21 | LEU | 152 | 16.378 | 83.652 | 1.187  |
| ATOM | 1900 | HD22 | LEU | 152 | 15.002 | 82.997 | 0.267  |
| ATOM | 1901 | HD23 | LEU | 152 | 15.698 | 84.575 | -0.175 |
| ATOM | 1902 | C    | LEU | 152 | 13.900 | 85.693 | 4.294  |
| ATOM | 1903 | O    | LEU | 152 | 12.751 | 85.258 | 4.367  |
| ATOM | 1904 | N    | TYR | 153 | 14.844 | 85.360 | 5.196  |
| ATOM | 1905 | H    | TYR | 153 | 15.635 | 85.789 | 5.191  |
| ATOM | 1906 | CA   | TYR | 153 | 14.593 | 84.327 | 6.163  |
| ATOM | 1907 | HA   | TYR | 153 | 14.007 | 83.529 | 5.707  |
| ATOM | 1908 | CB   | TYR | 153 | 15.910 | 83.737 | 6.671  |

|      |      |      |     |     |        |        |        |
|------|------|------|-----|-----|--------|--------|--------|
| ATOM | 1909 | HB2  | TYR | 153 | 16.531 | 84.571 | 6.999  |
| ATOM | 1910 | HB3  | TYR | 153 | 15.672 | 83.103 | 7.525  |
| ATOM | 1911 | CG   | TYR | 153 | 16.659 | 82.928 | 5.637  |
| ATOM | 1912 | CD1  | TYR | 153 | 17.235 | 83.544 | 4.533  |
| ATOM | 1913 | HD1  | TYR | 153 | 17.139 | 84.624 | 4.424  |
| ATOM | 1914 | CE1  | TYR | 153 | 17.921 | 82.812 | 3.582  |
| ATOM | 1915 | HE1  | TYR | 153 | 18.368 | 83.308 | 2.721  |
| ATOM | 1916 | CZ   | TYR | 153 | 18.038 | 81.447 | 3.728  |
| ATOM | 1917 | OH   | TYR | 153 | 18.721 | 80.716 | 2.782  |
| ATOM | 1918 | HH   | TYR | 153 | 19.002 | 81.226 | 2.191  |
| ATOM | 1919 | CE2  | TYR | 153 | 17.469 | 80.803 | 4.826  |
| ATOM | 1920 | HE2  | TYR | 153 | 17.557 | 79.723 | 4.947  |
| ATOM | 1921 | CD2  | TYR | 153 | 16.787 | 81.551 | 5.767  |
| ATOM | 1922 | HD2  | TYR | 153 | 16.337 | 81.061 | 6.631  |
| ATOM | 1923 | C    | TYR | 153 | 13.789 | 84.830 | 7.315  |
| ATOM | 1924 | O    | TYR | 153 | 13.992 | 85.943 | 7.799  |
| ATOM | 1925 | N    | GLN | 154 | 12.814 | 84.004 | 7.757  |
| ATOM | 1926 | H    | GLN | 154 | 12.703 | 83.213 | 7.343  |
| ATOM | 1927 | CA   | GLN | 154 | 11.968 | 84.363 | 8.857  |
| ATOM | 1928 | HA   | GLN | 154 | 12.376 | 85.235 | 9.368  |
| ATOM | 1929 | CB   | GLN | 154 | 10.560 | 84.701 | 8.362  |
| ATOM | 1930 | HB2  | GLN | 154 | 10.170 | 83.810 | 7.870  |
| ATOM | 1931 | HB3  | GLN | 154 | 9.955  | 84.924 | 9.241  |
| ATOM | 1932 | CG   | GLN | 154 | 10.507 | 85.876 | 7.399  |
| ATOM | 1933 | HG2  | GLN | 154 | 11.236 | 85.711 | 6.605  |
| ATOM | 1934 | HG3  | GLN | 154 | 9.507  | 85.931 | 6.968  |
| ATOM | 1935 | CD   | GLN | 154 | 10.817 | 87.198 | 8.075  |
| ATOM | 1936 | OE1  | GLN | 154 | 10.592 | 87.360 | 9.274  |
| ATOM | 1937 | NE2  | GLN | 154 | 11.335 | 88.147 | 7.305  |
| ATOM | 1938 | HE21 | GLN | 154 | 11.537 | 88.951 | 7.656  |
| ATOM | 1939 | HE22 | GLN | 154 | 11.483 | 87.987 | 6.432  |
| ATOM | 1940 | C    | GLN | 154 | 11.945 | 83.230 | 9.834  |
| ATOM | 1941 | O    | GLN | 154 | 12.425 | 82.132 | 9.557  |
| ATOM | 1942 | N    | ARG | 155 | 11.375 | 83.498 | 11.026 |
| ATOM | 1943 | H    | ARG | 155 | 11.024 | 84.321 | 11.124 |
| ATOM | 1944 | CA   | ARG | 155 | 11.308 | 82.558 | 12.105 |
| ATOM | 1945 | HA   | ARG | 155 | 12.308 | 82.193 | 12.339 |
| ATOM | 1946 | CB   | ARG | 155 | 10.723 | 83.218 | 13.355 |
| ATOM | 1947 | HB2  | ARG | 155 | 9.803  | 83.718 | 13.053 |
| ATOM | 1948 | HB3  | ARG | 155 | 10.488 | 82.420 | 14.059 |
| ATOM | 1949 | CG   | ARG | 155 | 11.651 | 84.222 | 14.019 |
| ATOM | 1950 | HG2  | ARG | 155 | 12.641 | 83.775 | 14.105 |
| ATOM | 1951 | HG3  | ARG | 155 | 11.708 | 85.111 | 13.391 |
| ATOM | 1952 | CD   | ARG | 155 | 11.148 | 84.609 | 15.400 |
| ATOM | 1953 | HD2  | ARG | 155 | 11.047 | 83.709 | 16.007 |
| ATOM | 1954 | HD3  | ARG | 155 | 11.871 | 85.280 | 15.864 |
| ATOM | 1955 | NE   | ARG | 155 | 9.853  | 85.283 | 15.342 |
| ATOM | 1956 | HE   | ARG | 155 | 9.151  | 84.790 | 15.415 |
| ATOM | 1957 | CZ   | ARG | 155 | 9.699  | 86.593 | 15.184 |
| ATOM | 1958 | NH1  | ARG | 155 | 8.482  | 87.118 | 15.142 |
| ATOM | 1959 | HH11 | ARG | 155 | 7.792  | 86.610 | 15.217 |
| ATOM | 1960 | HH12 | ARG | 155 | 8.382  | 87.966 | 15.041 |

|      |      |      |     |     |        |        |        |
|------|------|------|-----|-----|--------|--------|--------|
| ATOM | 1961 | NH2  | ARG | 155 | 10.763 | 87.377 | 15.069 |
| ATOM | 1962 | HH21 | ARG | 155 | 11.552 | 87.037 | 15.097 |
| ATOM | 1963 | HH22 | ARG | 155 | 10.663 | 88.225 | 14.968 |
| ATOM | 1964 | C    | ARG | 155 | 10.486 | 81.385 | 11.677 |
| ATOM | 1965 | O    | ARG | 155 | 10.820 | 80.243 | 11.988 |
| ATOM | 1966 | N    | ARG | 156 | 9.380  | 81.649 | 10.957 |
| ATOM | 1967 | H    | ARG | 156 | 9.214  | 82.509 | 10.749 |
| ATOM | 1968 | CA   | ARG | 156 | 8.479  | 80.619 | 10.522 |
| ATOM | 1969 | HA   | ARG | 156 | 8.171  | 80.013 | 11.374 |
| ATOM | 1970 | CB   | ARG | 156 | 7.232  | 81.233 | 9.883  |
| ATOM | 1971 | HB2  | ARG | 156 | 7.574  | 81.960 | 9.147  |
| ATOM | 1972 | HB3  | ARG | 156 | 6.701  | 80.427 | 9.377  |
| ATOM | 1973 | CG   | ARG | 156 | 6.298  | 81.913 | 10.871 |
| ATOM | 1974 | HG2  | ARG | 156 | 6.149  | 81.248 | 11.722 |
| ATOM | 1975 | HG3  | ARG | 156 | 6.765  | 82.837 | 11.211 |
| ATOM | 1976 | CD   | ARG | 156 | 4.955  | 82.229 | 10.234 |
| ATOM | 1977 | HD2  | ARG | 156 | 4.518  | 81.306 | 9.853  |
| ATOM | 1978 | HD3  | ARG | 156 | 4.296  | 82.658 | 10.988 |
| ATOM | 1979 | NE   | ARG | 156 | 5.083  | 83.177 | 9.130  |
| ATOM | 1980 | HE   | ARG | 156 | 5.184  | 82.849 | 8.341  |
| ATOM | 1981 | CZ   | ARG | 156 | 5.052  | 84.498 | 9.272  |
| ATOM | 1982 | NH1  | ARG | 156 | 5.175  | 85.282 | 8.210  |
| ATOM | 1983 | HH11 | ARG | 156 | 5.276  | 84.936 | 7.430  |
| ATOM | 1984 | HH12 | ARG | 156 | 5.155  | 86.137 | 8.303  |
| ATOM | 1985 | NH2  | ARG | 156 | 4.897  | 85.032 | 10.476 |
| ATOM | 1986 | HH21 | ARG | 156 | 4.817  | 84.523 | 11.165 |
| ATOM | 1987 | HH22 | ARG | 156 | 4.877  | 85.887 | 10.568 |
| ATOM | 1988 | C    | ARG | 156 | 9.169  | 79.706 | 9.560  |
| ATOM | 1989 | O    | ARG | 156 | 9.009  | 78.488 | 9.627  |
| ATOM | 1990 | N    | HIE | 157 | 9.968  | 80.277 | 8.641  |
| ATOM | 1991 | H    | HIE | 157 | 10.102 | 81.166 | 8.674  |
| ATOM | 1992 | CA   | HIE | 157 | 10.601 | 79.494 | 7.621  |
| ATOM | 1993 | HA   | HIE | 157 | 9.850  | 78.926 | 7.072  |
| ATOM | 1994 | CB   | HIE | 157 | 11.346 | 80.398 | 6.636  |
| ATOM | 1995 | HB2  | HIE | 157 | 10.654 | 81.106 | 6.181  |
| ATOM | 1996 | HB3  | HIE | 157 | 12.136 | 80.944 | 7.152  |
| ATOM | 1997 | CG   | HIE | 157 | 12.001 | 79.657 | 5.513  |
| ATOM | 1998 | ND1  | HIE | 157 | 11.286 | 79.071 | 4.491  |
| ATOM | 1999 | CE1  | HIE | 157 | 12.143 | 78.484 | 3.637  |
| ATOM | 2000 | HE1  | HIE | 157 | 11.717 | 77.976 | 2.772  |
| ATOM | 2001 | NE2  | HIE | 157 | 13.396 | 78.637 | 4.021  |
| ATOM | 2002 | HE2  | HIE | 157 | 14.151 | 78.316 | 3.585  |
| ATOM | 2003 | CD2  | HIE | 157 | 13.371 | 79.334 | 5.141  |
| ATOM | 2004 | HD2  | HIE | 157 | 14.303 | 79.585 | 5.648  |
| ATOM | 2005 | C    | HIE | 157 | 11.529 | 78.515 | 8.261  |
| ATOM | 2006 | O    | HIE | 157 | 11.625 | 77.368 | 7.828  |
| ATOM | 2007 | N    | THR | 158 | 12.244 | 78.946 | 9.315  |
| ATOM | 2008 | H    | THR | 158 | 12.129 | 79.785 | 9.620  |
| ATOM | 2009 | CA   | THR | 158 | 13.186 | 78.075 | 9.953  |
| ATOM | 2010 | HA   | THR | 158 | 13.898 | 77.715 | 9.210  |
| ATOM | 2011 | CB   | THR | 158 | 13.963 | 78.802 | 11.067 |
| ATOM | 2012 | HB   | THR | 158 | 13.254 | 79.189 | 11.799 |

|      |      |      |     |     |        |        |        |
|------|------|------|-----|-----|--------|--------|--------|
| ATOM | 2013 | CG2  | THR | 158 | 14.929 | 77.848 | 11.752 |
| ATOM | 2014 | HG21 | THR | 158 | 15.638 | 77.461 | 11.020 |
| ATOM | 2015 | HG22 | THR | 158 | 15.469 | 78.378 | 12.536 |
| ATOM | 2016 | HG23 | THR | 158 | 14.373 | 77.020 | 12.191 |
| ATOM | 2017 | OG1  | THR | 158 | 14.712 | 79.885 | 10.502 |
| ATOM | 2018 | HG1  | THR | 158 | 14.192 | 80.418 | 10.134 |
| ATOM | 2019 | C    | THR | 158 | 12.463 | 76.888 | 10.511 |
| ATOM | 2020 | O    | THR | 158 | 12.904 | 75.753 | 10.338 |
| ATOM | 2021 | N    | ALA | 159 | 11.311 | 77.115 | 11.168 |
| ATOM | 2022 | H    | ALA | 159 | 10.996 | 77.958 | 11.194 |
| ATOM | 2023 | CA   | ALA | 159 | 10.588 | 76.057 | 11.817 |
| ATOM | 2024 | HA   | ALA | 159 | 11.235 | 75.557 | 12.537 |
| ATOM | 2025 | CB   | ALA | 159 | 9.380  | 76.615 | 12.554 |
| ATOM | 2026 | HB1  | ALA | 159 | 8.718  | 77.111 | 11.844 |
| ATOM | 2027 | HB2  | ALA | 159 | 8.844  | 75.801 | 13.042 |
| ATOM | 2028 | HB3  | ALA | 159 | 9.711  | 77.333 | 13.304 |
| ATOM | 2029 | C    | ALA | 159 | 10.168 | 75.033 | 10.812 |
| ATOM | 2030 | O    | ALA | 159 | 10.243 | 73.833 | 11.072 |
| ATOM | 2031 | N    | GLY | 160 | 9.719  | 75.479 | 9.627  |
| ATOM | 2032 | H    | GLY | 160 | 9.710  | 76.362 | 9.451  |
| ATOM | 2033 | CA   | GLY | 160 | 9.254  | 74.547 | 8.643  |
| ATOM | 2034 | HA2  | GLY | 160 | 8.440  | 73.945 | 9.047  |
| ATOM | 2035 | HA3  | GLY | 160 | 8.909  | 75.076 | 7.754  |
| ATOM | 2036 | C    | GLY | 160 | 10.383 | 73.645 | 8.264  |
| ATOM | 2037 | O    | GLY | 160 | 10.195 | 72.444 | 8.077  |
| ATOM | 2038 | N    | MET | 161 | 11.593 | 74.214 | 8.133  |
| ATOM | 2039 | H    | MET | 161 | 11.674 | 75.092 | 8.315  |
| ATOM | 2040 | CA   | MET | 161 | 12.737 | 73.460 | 7.716  |
| ATOM | 2041 | HA   | MET | 161 | 12.517 | 72.940 | 6.784  |
| ATOM | 2042 | CB   | MET | 161 | 13.934 | 74.385 | 7.488  |
| ATOM | 2043 | HB2  | MET | 161 | 14.049 | 74.989 | 8.388  |
| ATOM | 2044 | HB3  | MET | 161 | 14.811 | 73.750 | 7.362  |
| ATOM | 2045 | CG   | MET | 161 | 13.793 | 75.298 | 6.281  |
| ATOM | 2046 | HG2  | MET | 161 | 13.766 | 74.676 | 5.386  |
| ATOM | 2047 | HG3  | MET | 161 | 12.852 | 75.840 | 6.374  |
| ATOM | 2048 | SD   | MET | 161 | 15.147 | 76.480 | 6.140  |
| ATOM | 2049 | CE   | MET | 161 | 16.504 | 75.392 | 5.713  |
| ATOM | 2050 | HE1  | MET | 161 | 16.277 | 74.876 | 4.780  |
| ATOM | 2051 | HE2  | MET | 161 | 17.415 | 75.977 | 5.592  |
| ATOM | 2052 | HE3  | MET | 161 | 16.647 | 74.659 | 6.507  |
| ATOM | 2053 | C    | MET | 161 | 13.046 | 72.421 | 8.752  |
| ATOM | 2054 | O    | MET | 161 | 13.382 | 71.286 | 8.417  |
| ATOM | 2055 | N    | LEU | 162 | 12.925 | 72.775 | 10.047 |
| ATOM | 2056 | H    | LEU | 162 | 12.672 | 73.611 | 10.266 |
| ATOM | 2057 | CA   | LEU | 162 | 13.201 | 71.815 | 11.079 |
| ATOM | 2058 | HA   | LEU | 162 | 14.203 | 71.408 | 10.946 |
| ATOM | 2059 | CB   | LEU | 162 | 13.119 | 72.472 | 12.458 |
| ATOM | 2060 | HB2  | LEU | 162 | 12.153 | 72.977 | 12.451 |
| ATOM | 2061 | HB3  | LEU | 162 | 13.109 | 71.681 | 13.208 |
| ATOM | 2062 | CG   | LEU | 162 | 14.219 | 73.481 | 12.795 |
| ATOM | 2063 | HG   | LEU | 162 | 14.280 | 74.217 | 11.993 |
| ATOM | 2064 | CD1  | LEU | 162 | 13.918 | 74.187 | 14.108 |

|      |      |      |     |     |        |        |        |
|------|------|------|-----|-----|--------|--------|--------|
| ATOM | 2065 | HD11 | LEU | 162 | 13.857 | 73.452 | 14.911 |
| ATOM | 2066 | HD12 | LEU | 162 | 14.713 | 74.900 | 14.328 |
| ATOM | 2067 | HD13 | LEU | 162 | 12.968 | 74.716 | 14.027 |
| ATOM | 2068 | CD2  | LEU | 162 | 15.575 | 72.795 | 12.862 |
| ATOM | 2069 | HD21 | LEU | 162 | 15.800 | 72.338 | 11.898 |
| ATOM | 2070 | HD22 | LEU | 162 | 16.343 | 73.530 | 13.103 |
| ATOM | 2071 | HD23 | LEU | 162 | 15.555 | 72.025 | 13.633 |
| ATOM | 2072 | C    | LEU | 162 | 12.233 | 70.684 | 10.960 |
| ATOM | 2073 | O    | LEU | 162 | 12.606 | 69.523 | 11.117 |
| ATOM | 2074 | N    | ALA | 163 | 10.956 | 70.997 | 10.675 |
| ATOM | 2075 | H    | ALA | 163 | 10.741 | 71.860 | 10.535 |
| ATOM | 2076 | CA   | ALA | 163 | 9.944  | 69.983 | 10.593 |
| ATOM | 2077 | HA   | ALA | 163 | 9.915  | 69.402 | 11.515 |
| ATOM | 2078 | CB   | ALA | 163 | 8.578  | 70.614 | 10.374 |
| ATOM | 2079 | HB1  | ALA | 163 | 8.588  | 71.192 | 9.450  |
| ATOM | 2080 | HB2  | ALA | 163 | 7.823  | 69.831 | 10.304 |
| ATOM | 2081 | HB3  | ALA | 163 | 8.343  | 71.271 | 11.211 |
| ATOM | 2082 | C    | ALA | 163 | 10.284 | 69.036 | 9.487  |
| ATOM | 2083 | O    | ALA | 163 | 10.140 | 67.823 | 9.633  |
| ATOM | 2084 | N    | LEU | 164 | 10.756 | 69.569 | 8.346  |
| ATOM | 2085 | H    | LEU | 164 | 10.882 | 70.459 | 8.297  |
| ATOM | 2086 | CA   | LEU | 164 | 11.058 | 68.739 | 7.217  |
| ATOM | 2087 | HA   | LEU | 164 | 10.185 | 68.141 | 6.955  |
| ATOM | 2088 | CB   | LEU | 164 | 11.444 | 69.596 | 6.010  |
| ATOM | 2089 | HB2  | LEU | 164 | 12.215 | 70.262 | 6.398  |
| ATOM | 2090 | HB3  | LEU | 164 | 11.878 | 68.940 | 5.255  |
| ATOM | 2091 | CG   | LEU | 164 | 10.323 | 70.425 | 5.381  |
| ATOM | 2092 | HG   | LEU | 164 | 9.837  | 71.010 | 6.162  |
| ATOM | 2093 | CD1  | LEU | 164 | 10.877 | 71.360 | 4.317  |
| ATOM | 2094 | HD11 | LEU | 164 | 11.363 | 70.775 | 3.536  |
| ATOM | 2095 | HD12 | LEU | 164 | 10.063 | 71.940 | 3.883  |
| ATOM | 2096 | HD13 | LEU | 164 | 11.603 | 72.036 | 4.769  |
| ATOM | 2097 | CD2  | LEU | 164 | 9.254  | 69.521 | 4.786  |
| ATOM | 2098 | HD21 | LEU | 164 | 8.830  | 68.894 | 5.570  |
| ATOM | 2099 | HD22 | LEU | 164 | 8.466  | 70.131 | 4.344  |
| ATOM | 2100 | HD23 | LEU | 164 | 9.698  | 68.889 | 4.017  |
| ATOM | 2101 | C    | LEU | 164 | 12.158 | 67.796 | 7.582  |
| ATOM | 2102 | O    | LEU | 164 | 12.111 | 66.615 | 7.239  |
| ATOM | 2103 | N    | SER | 165 | 13.180 | 68.293 | 8.301  |
| ATOM | 2104 | H    | SER | 165 | 13.158 | 69.152 | 8.568  |
| ATOM | 2105 | CA   | SER | 165 | 14.301 | 67.464 | 8.643  |
| ATOM | 2106 | HA   | SER | 165 | 14.751 | 67.059 | 7.737  |
| ATOM | 2107 | CB   | SER | 165 | 15.359 | 68.276 | 9.393  |
| ATOM | 2108 | HB2  | SER | 165 | 15.701 | 69.085 | 8.747  |
| ATOM | 2109 | HB3  | SER | 165 | 14.905 | 68.696 | 10.291 |
| ATOM | 2110 | OG   | SER | 165 | 16.462 | 67.464 | 9.757  |
| ATOM | 2111 | HG   | SER | 165 | 17.021 | 67.925 | 10.162 |
| ATOM | 2112 | C    | SER | 165 | 13.814 | 66.312 | 9.465  |
| ATOM | 2113 | O    | SER | 165 | 14.146 | 65.160 | 9.192  |
| ATOM | 2114 | N    | TRP | 166 | 12.990 | 66.596 | 10.491 |
| ATOM | 2115 | H    | TRP | 166 | 12.748 | 67.452 | 10.628 |
| ATOM | 2116 | CA   | TRP | 166 | 12.499 | 65.563 | 11.359 |



|      |      |      |     |     |        |        |        |
|------|------|------|-----|-----|--------|--------|--------|
| ATOM | 2117 | HA   | TRP | 166 | 13.334 | 64.982 | 11.751 |
| ATOM | 2118 | CB   | TRP | 166 | 11.731 | 66.171 | 12.535 |
| ATOM | 2119 | HB2  | TRP | 166 | 12.380 | 66.835 | 13.107 |
| ATOM | 2120 | HB3  | TRP | 166 | 10.869 | 66.731 | 12.172 |
| ATOM | 2121 | CG   | TRP | 166 | 11.205 | 65.152 | 13.498 |
| ATOM | 2122 | CD1  | TRP | 166 | 11.859 | 64.628 | 14.576 |
| ATOM | 2123 | HD1  | TRP | 166 | 12.872 | 64.987 | 14.758 |
| ATOM | 2124 | NE1  | TRP | 166 | 11.056 | 63.721 | 15.224 |
| ATOM | 2125 | HE1  | TRP | 166 | 11.298 | 63.238 | 15.989 |
| ATOM | 2126 | CE2  | TRP | 166 | 9.855  | 63.646 | 14.563 |
| ATOM | 2127 | CZ2  | TRP | 166 | 8.728  | 62.872 | 14.837 |
| ATOM | 2128 | HZ2  | TRP | 166 | 8.753  | 62.206 | 15.699 |
| ATOM | 2129 | CH2  | TRP | 166 | 7.655  | 62.999 | 14.001 |
| ATOM | 2130 | HH2  | TRP | 166 | 6.755  | 62.412 | 14.182 |
| ATOM | 2131 | CZ3  | TRP | 166 | 7.686  | 63.873 | 12.909 |
| ATOM | 2132 | HZ3  | TRP | 166 | 6.824  | 63.965 | 12.248 |
| ATOM | 2133 | CE3  | TRP | 166 | 8.800  | 64.642 | 12.633 |
| ATOM | 2134 | HE3  | TRP | 166 | 8.770  | 65.307 | 11.770 |
| ATOM | 2135 | CD2  | TRP | 166 | 9.913  | 64.533 | 13.472 |
| ATOM | 2136 | C    | TRP | 166 | 11.627 | 64.618 | 10.591 |
| ATOM | 2137 | O    | TRP | 166 | 11.688 | 63.408 | 10.800 |
| ATOM | 2138 | N    | ALA | 167 | 10.772 | 65.141 | 9.693  |
| ATOM | 2139 | H    | ALA | 167 | 10.763 | 66.029 | 9.546  |
| ATOM | 2140 | CA   | ALA | 167 | 9.874  | 64.284 | 8.969  |
| ATOM | 2141 | HA   | ALA | 167 | 9.290  | 63.687 | 9.669  |
| ATOM | 2142 | CB   | ALA | 167 | 8.919  | 65.111 | 8.122  |
| ATOM | 2143 | HB1  | ALA | 167 | 9.488  | 65.708 | 7.410  |
| ATOM | 2144 | HB2  | ALA | 167 | 8.244  | 64.447 | 7.582  |
| ATOM | 2145 | HB3  | ALA | 167 | 8.339  | 65.771 | 8.767  |
| ATOM | 2146 | C    | ALA | 167 | 10.653 | 63.331 | 8.113  |
| ATOM | 2147 | O    | ALA | 167 | 10.363 | 62.136 | 8.084  |
| ATOM | 2148 | N    | LEU | 168 | 11.671 | 63.841 | 7.394  |
| ATOM | 2149 | H    | LEU | 168 | 11.849 | 64.719 | 7.483  |
| ATOM | 2150 | CA   | LEU | 168 | 12.463 | 63.034 | 6.508  |
| ATOM | 2151 | HA   | LEU | 168 | 11.812 | 62.480 | 5.832  |
| ATOM | 2152 | CB   | LEU | 168 | 13.398 | 63.913 | 5.675  |
| ATOM | 2153 | HB2  | LEU | 168 | 13.912 | 64.524 | 6.417  |
| ATOM | 2154 | HB3  | LEU | 168 | 14.118 | 63.263 | 5.178  |
| ATOM | 2155 | CG   | LEU | 168 | 12.732 | 64.821 | 4.640  |
| ATOM | 2156 | HG   | LEU | 168 | 11.956 | 65.407 | 5.132  |
| ATOM | 2157 | CD1  | LEU | 168 | 13.751 | 65.758 | 4.011  |
| ATOM | 2158 | HD11 | LEU | 168 | 14.527 | 65.173 | 3.518  |
| ATOM | 2159 | HD12 | LEU | 168 | 13.256 | 66.395 | 3.278  |
| ATOM | 2160 | HD13 | LEU | 168 | 14.201 | 66.379 | 4.786  |
| ATOM | 2161 | CD2  | LEU | 168 | 12.039 | 63.996 | 3.567  |
| ATOM | 2162 | HD21 | LEU | 168 | 11.276 | 63.368 | 4.027  |
| ATOM | 2163 | HD22 | LEU | 168 | 11.572 | 64.662 | 2.841  |
| ATOM | 2164 | HD23 | LEU | 168 | 12.772 | 63.366 | 3.063  |
| ATOM | 2165 | C    | LEU | 168 | 13.225 | 62.044 | 7.332  |
| ATOM | 2166 | O    | LEU | 168 | 13.307 | 60.865 | 6.991  |
| ATOM | 2167 | N    | ALA | 169 | 13.777 | 62.502 | 8.469  |
| ATOM | 2168 | H    | ALA | 169 | 13.631 | 63.360 | 8.700  |

|      |      |      |     |     |        |        |        |
|------|------|------|-----|-----|--------|--------|--------|
| ATOM | 2169 | CA   | ALA | 169 | 14.581 | 61.662 | 9.306  |
| ATOM | 2170 | HA   | ALA | 169 | 15.419 | 61.244 | 8.748  |
| ATOM | 2171 | CB   | ALA | 169 | 15.128 | 62.455 | 10.483 |
| ATOM | 2172 | HB1  | ALA | 169 | 14.300 | 62.873 | 11.056 |
| ATOM | 2173 | HB2  | ALA | 169 | 15.717 | 61.798 | 11.122 |
| ATOM | 2174 | HB3  | ALA | 169 | 15.759 | 63.264 | 10.115 |
| ATOM | 2175 | C    | ALA | 169 | 13.745 | 60.510 | 9.760  |
| ATOM | 2176 | O    | ALA | 169 | 14.210 | 59.372 | 9.800  |
| ATOM | 2177 | N    | LEU | 170 | 12.480 | 60.787 | 10.114 |
| ATOM | 2178 | H    | LEU | 170 | 12.199 | 61.638 | 10.035 |
| ATOM | 2179 | CA   | LEU | 170 | 11.585 | 59.779 | 10.604 |
| ATOM | 2180 | HA   | LEU | 170 | 12.037 | 59.265 | 11.452 |
| ATOM | 2181 | CB   | LEU | 170 | 10.267 | 60.408 | 11.059 |
| ATOM | 2182 | HB2  | LEU | 170 | 10.567 | 61.114 | 11.833 |
| ATOM | 2183 | HB3  | LEU | 170 | 9.845  | 60.953 | 10.215 |
| ATOM | 2184 | CG   | LEU | 170 | 9.217  | 59.449 | 11.623 |
| ATOM | 2185 | HG   | LEU | 170 | 8.961  | 58.716 | 10.858 |
| ATOM | 2186 | CD1  | LEU | 170 | 9.751  | 58.731 | 12.853 |
| ATOM | 2187 | HD11 | LEU | 170 | 10.007 | 59.463 | 13.619 |
| ATOM | 2188 | HD12 | LEU | 170 | 8.989  | 58.054 | 13.239 |
| ATOM | 2189 | HD13 | LEU | 170 | 10.640 | 58.161 | 12.584 |
| ATOM | 2190 | CD2  | LEU | 170 | 7.934  | 60.194 | 11.961 |
| ATOM | 2191 | HD21 | LEU | 170 | 7.536  | 60.661 | 11.060 |
| ATOM | 2192 | HD22 | LEU | 170 | 7.201  | 59.493 | 12.361 |
| ATOM | 2193 | HD23 | LEU | 170 | 8.145  | 60.962 | 12.705 |
| ATOM | 2194 | C    | LEU | 170 | 11.353 | 58.760 | 9.533  |
| ATOM | 2195 | O    | LEU | 170 | 11.365 | 57.559 | 9.802  |
| ATOM | 2196 | N    | GLY | 171 | 11.133 | 59.201 | 8.282  |
| ATOM | 2197 | H    | GLY | 171 | 11.175 | 60.077 | 8.080  |
| ATOM | 2198 | CA   | GLY | 171 | 10.827 | 58.244 | 7.261  |
| ATOM | 2199 | HA2  | GLY | 171 | 9.953  | 57.661 | 7.553  |
| ATOM | 2200 | HA3  | GLY | 171 | 10.623 | 58.759 | 6.322  |
| ATOM | 2201 | C    | GLY | 171 | 11.987 | 57.319 | 7.066  |
| ATOM | 2202 | O    | GLY | 171 | 11.826 | 56.100 | 7.045  |
| ATOM | 2203 | N    | LEU | 172 | 13.199 | 57.884 | 6.935  |
| ATOM | 2204 | H    | LEU | 172 | 13.268 | 58.779 | 7.004  |
| ATOM | 2205 | CA   | LEU | 172 | 14.367 | 57.093 | 6.690  |
| ATOM | 2206 | HA   | LEU | 172 | 14.192 | 56.428 | 5.844  |
| ATOM | 2207 | CB   | LEU | 172 | 15.564 | 57.990 | 6.367  |
| ATOM | 2208 | HB2  | LEU | 172 | 15.588 | 58.703 | 7.191  |
| ATOM | 2209 | HB3  | LEU | 172 | 16.463 | 57.375 | 6.394  |
| ATOM | 2210 | CG   | LEU | 172 | 15.504 | 58.748 | 5.039  |
| ATOM | 2211 | HG   | LEU | 172 | 14.562 | 59.293 | 4.986  |
| ATOM | 2212 | CD1  | LEU | 172 | 16.663 | 59.727 | 4.927  |
| ATOM | 2213 | HD11 | LEU | 172 | 17.606 | 59.182 | 4.980  |
| ATOM | 2214 | HD12 | LEU | 172 | 16.602 | 60.256 | 3.976  |
| ATOM | 2215 | HD13 | LEU | 172 | 16.613 | 60.445 | 5.745  |
| ATOM | 2216 | CD2  | LEU | 172 | 15.514 | 57.779 | 3.867  |
| ATOM | 2217 | HD21 | LEU | 172 | 14.650 | 57.118 | 3.934  |
| ATOM | 2218 | HD22 | LEU | 172 | 15.471 | 58.338 | 2.932  |
| ATOM | 2219 | HD23 | LEU | 172 | 16.428 | 57.186 | 3.893  |
| ATOM | 2220 | C    | LEU | 172 | 14.661 | 56.231 | 7.871  |

|      |      |      |     |     |        |        |        |
|------|------|------|-----|-----|--------|--------|--------|
| ATOM | 2221 | O    | LEU | 172 | 15.145 | 55.119 | 7.701  |
| ATOM | 2222 | N    | VAL | 173 | 14.469 | 56.746 | 9.099  |
| ATOM | 2223 | H    | VAL | 173 | 14.165 | 57.589 | 9.178  |
| ATOM | 2224 | CA   | VAL | 173 | 14.743 | 55.968 | 10.276 |
| ATOM | 2225 | HA   | VAL | 173 | 15.676 | 55.413 | 10.180 |
| ATOM | 2226 | CB   | VAL | 173 | 14.825 | 56.855 | 11.532 |
| ATOM | 2227 | HB   | VAL | 173 | 13.928 | 57.472 | 11.590 |
| ATOM | 2228 | CG1  | VAL | 173 | 14.931 | 55.997 | 12.784 |
| ATOM | 2229 | HG11 | VAL | 173 | 15.828 | 55.380 | 12.727 |
| ATOM | 2230 | HG12 | VAL | 173 | 14.988 | 56.640 | 13.662 |
| ATOM | 2231 | HG13 | VAL | 173 | 14.053 | 55.355 | 12.861 |
| ATOM | 2232 | CG2  | VAL | 173 | 16.006 | 57.809 | 11.435 |
| ATOM | 2233 | HG21 | VAL | 173 | 15.888 | 58.447 | 10.559 |
| ATOM | 2234 | HG22 | VAL | 173 | 16.048 | 58.428 | 12.331 |
| ATOM | 2235 | HG23 | VAL | 173 | 16.929 | 57.237 | 11.345 |
| ATOM | 2236 | C    | VAL | 173 | 13.728 | 54.892 | 10.510 |
| ATOM | 2237 | O    | VAL | 173 | 14.088 | 53.739 | 10.726 |
| ATOM | 2238 | N    | LEU | 174 | 12.429 | 55.241 | 10.498 |
| ATOM | 2239 | H    | LEU | 174 | 12.221 | 56.088 | 10.277 |
| ATOM | 2240 | CA   | LEU | 174 | 11.387 | 54.308 | 10.824 |
| ATOM | 2241 | HA   | LEU | 174 | 11.657 | 53.752 | 11.722 |
| ATOM | 2242 | CB   | LEU | 174 | 10.070 | 55.044 | 11.082 |
| ATOM | 2243 | HB2  | LEU | 174 | 10.307 | 55.729 | 11.896 |
| ATOM | 2244 | HB3  | LEU | 174 | 9.822  | 55.615 | 10.187 |
| ATOM | 2245 | CG   | LEU | 174 | 8.875  | 54.175 | 11.479 |
| ATOM | 2246 | HG   | LEU | 174 | 8.665  | 53.473 | 10.672 |
| ATOM | 2247 | CD1  | LEU | 174 | 9.172  | 53.404 | 12.756 |
| ATOM | 2248 | HD11 | LEU | 174 | 9.381  | 54.105 | 13.564 |
| ATOM | 2249 | HD12 | LEU | 174 | 8.309  | 52.792 | 13.021 |
| ATOM | 2250 | HD13 | LEU | 174 | 10.038 | 52.761 | 12.600 |
| ATOM | 2251 | CD2  | LEU | 174 | 7.626  | 55.026 | 11.653 |
| ATOM | 2252 | HD21 | LEU | 174 | 7.397  | 55.532 | 10.715 |
| ATOM | 2253 | HD22 | LEU | 174 | 6.788  | 54.389 | 11.935 |
| ATOM | 2254 | HD23 | LEU | 174 | 7.797  | 55.768 | 12.433 |
| ATOM | 2255 | C    | LEU | 174 | 11.166 | 53.277 | 9.767  |
| ATOM | 2256 | O    | LEU | 174 | 10.967 | 52.115 | 10.090 |
| ATOM | 2257 | N    | LEU | 175 | 11.209 | 53.633 | 8.474  |
| ATOM | 2258 | H    | LEU | 175 | 11.504 | 54.439 | 8.204  |
| ATOM | 2259 | CA   | LEU | 175 | 10.761 | 52.670 | 7.506  |
| ATOM | 2260 | HA   | LEU | 175 | 9.737  | 52.370 | 7.730  |
| ATOM | 2261 | CB   | LEU | 175 | 10.798 | 53.268 | 6.098  |
| ATOM | 2262 | HB2  | LEU | 175 | 11.803 | 53.682 | 6.015  |
| ATOM | 2263 | HB3  | LEU | 175 | 10.681 | 52.454 | 5.382  |
| ATOM | 2264 | CG   | LEU | 175 | 9.770  | 54.361 | 5.799  |
| ATOM | 2265 | HG   | LEU | 175 | 9.823  | 55.119 | 6.581  |
| ATOM | 2266 | CD1  | LEU | 175 | 10.047 | 55.005 | 4.449  |
| ATOM | 2267 | HD11 | LEU | 175 | 9.993  | 54.248 | 3.667  |
| ATOM | 2268 | HD12 | LEU | 175 | 9.305  | 55.779 | 4.256  |
| ATOM | 2269 | HD13 | LEU | 175 | 11.042 | 55.450 | 4.455  |
| ATOM | 2270 | CD2  | LEU | 175 | 8.358  | 53.796 | 5.836  |
| ATOM | 2271 | HD21 | LEU | 175 | 8.157  | 53.384 | 6.825  |
| ATOM | 2272 | HD22 | LEU | 175 | 7.643  | 54.590 | 5.621  |

|      |      |      |     |     |        |        |        |
|------|------|------|-----|-----|--------|--------|--------|
| ATOM | 2273 | HD23 | LEU | 175 | 8.262  | 53.008 | 5.089  |
| ATOM | 2274 | C    | LEU | 175 | 11.566 | 51.403 | 7.520  |
| ATOM | 2275 | O    | LEU | 175 | 10.991 | 50.318 | 7.570  |
| ATOM | 2276 | N    | LEU | 176 | 12.907 | 51.457 | 7.530  |
| ATOM | 2277 | H    | LEU | 176 | 13.395 | 52.211 | 7.583  |
| ATOM | 2278 | CA   | LEU | 176 | 13.561 | 50.184 | 7.448  |
| ATOM | 2279 | HA   | LEU | 176 | 13.143 | 49.607 | 6.623  |
| ATOM | 2280 | CB   | LEU | 176 | 15.061 | 50.367 | 7.206  |
| ATOM | 2281 | HB2  | LEU | 176 | 15.371 | 51.058 | 7.990  |
| ATOM | 2282 | HB3  | LEU | 176 | 15.547 | 49.403 | 7.358  |
| ATOM | 2283 | CG   | LEU | 176 | 15.463 | 50.931 | 5.842  |
| ATOM | 2284 | HG   | LEU | 176 | 14.908 | 51.852 | 5.663  |
| ATOM | 2285 | CD1  | LEU | 176 | 16.955 | 51.223 | 5.800  |
| ATOM | 2286 | HD11 | LEU | 176 | 17.511 | 50.303 | 5.978  |
| ATOM | 2287 | HD12 | LEU | 176 | 17.220 | 51.623 | 4.821  |
| ATOM | 2288 | HD13 | LEU | 176 | 17.205 | 51.953 | 6.570  |
| ATOM | 2289 | CD2  | LEU | 176 | 15.081 | 49.969 | 4.728  |
| ATOM | 2290 | HD21 | LEU | 176 | 14.003 | 49.810 | 4.739  |
| ATOM | 2291 | HD22 | LEU | 176 | 15.376 | 50.390 | 3.767  |
| ATOM | 2292 | HD23 | LEU | 176 | 15.590 | 49.017 | 4.879  |
| ATOM | 2293 | C    | LEU | 176 | 13.349 | 49.357 | 8.686  |
| ATOM | 2294 | O    | LEU | 176 | 13.259 | 48.137 | 8.564  |
| ATOM | 2295 | N    | PRO | 177 | 13.295 | 49.900 | 9.876  |
| ATOM | 2296 | CD   | PRO | 177 | 13.692 | 51.348 | 10.320 |
| ATOM | 2297 | HD2  | PRO | 177 | 12.865 | 52.042 | 10.171 |
| ATOM | 2298 | HD3  | PRO | 177 | 14.565 | 51.699 | 9.769  |
| ATOM | 2299 | CG   | PRO | 177 | 13.990 | 51.109 | 11.774 |
| ATOM | 2300 | HG2  | PRO | 177 | 13.793 | 52.020 | 12.340 |
| ATOM | 2301 | HG3  | PRO | 177 | 15.037 | 50.830 | 11.889 |
| ATOM | 2302 | CB   | PRO | 177 | 13.092 | 49.997 | 12.202 |
| ATOM | 2303 | HB2  | PRO | 177 | 12.081 | 50.334 | 12.432 |
| ATOM | 2304 | HB3  | PRO | 177 | 13.512 | 49.490 | 13.071 |
| ATOM | 2305 | CA   | PRO | 177 | 13.063 | 49.045 | 11.005 |
| ATOM | 2306 | HA   | PRO | 177 | 13.896 | 48.343 | 11.025 |
| ATOM | 2307 | C    | PRO | 177 | 11.767 | 48.284 | 11.011 |
| ATOM | 2308 | O    | PRO | 177 | 11.837 | 47.075 | 11.216 |
| ATOM | 2309 | N    | PRO | 178 | 10.617 | 48.879 | 10.832 |
| ATOM | 2310 | CD   | PRO | 178 | 10.251 | 50.353 | 10.975 |
| ATOM | 2311 | HD2  | PRO | 178 | 10.429 | 50.885 | 10.040 |
| ATOM | 2312 | HD3  | PRO | 178 | 10.831 | 50.817 | 11.773 |
| ATOM | 2313 | CG   | PRO | 178 | 8.789  | 50.253 | 11.313 |
| ATOM | 2314 | HG2  | PRO | 178 | 8.271  | 51.142 | 10.952 |
| ATOM | 2315 | HG3  | PRO | 178 | 8.670  | 50.177 | 12.394 |
| ATOM | 2316 | CB   | PRO | 178 | 8.292  | 49.020 | 10.635 |
| ATOM | 2317 | HB2  | PRO | 178 | 8.027  | 49.187 | 9.591  |
| ATOM | 2318 | HB3  | PRO | 178 | 7.429  | 48.622 | 11.170 |
| ATOM | 2319 | CA   | PRO | 178 | 9.460  | 48.036 | 10.724 |
| ATOM | 2320 | HA   | PRO | 178 | 9.429  | 47.452 | 11.644 |
| ATOM | 2321 | C    | PRO | 178 | 9.414  | 47.113 | 9.547  |
| ATOM | 2322 | O    | PRO | 178 | 8.840  | 46.035 | 9.676  |
| ATOM | 2323 | N    | TRP | 179 | 9.987  | 47.503 | 8.396  |
| ATOM | 2324 | H    | TRP | 179 | 10.349 | 48.326 | 8.357  |

|      |      |     |     |     |        |        |       |
|------|------|-----|-----|-----|--------|--------|-------|
| ATOM | 2325 | CA  | TRP | 179 | 10.031 | 46.644 | 7.245 |
| ATOM | 2326 | HA  | TRP | 179 | 9.043  | 46.222 | 7.061 |
| ATOM | 2327 | CB  | TRP | 179 | 10.465 | 47.430 | 6.006 |
| ATOM | 2328 | HB2 | TRP | 179 | 11.374 | 47.994 | 6.218 |
| ATOM | 2329 | HB3 | TRP | 179 | 10.646 | 46.751 | 5.173 |
| ATOM | 2330 | CG  | TRP | 179 | 9.445  | 48.422 | 5.537 |
| ATOM | 2331 | CD1 | TRP | 179 | 9.492  | 49.778 | 5.685 |
| ATOM | 2332 | HD1 | TRP | 179 | 10.362 | 50.187 | 6.198 |
| ATOM | 2333 | NE1 | TRP | 179 | 8.376  | 50.355 | 5.127 |
| ATOM | 2334 | HE1 | TRP | 179 | 8.196  | 51.274 | 5.111 |
| ATOM | 2335 | CE2 | TRP | 179 | 7.583  | 49.364 | 4.604 |
| ATOM | 2336 | CZ2 | TRP | 179 | 6.359  | 49.451 | 3.943 |
| ATOM | 2337 | HZ2 | TRP | 179 | 5.920  | 50.437 | 3.793 |
| ATOM | 2338 | CH2 | TRP | 179 | 5.782  | 48.286 | 3.522 |
| ATOM | 2339 | HH2 | TRP | 179 | 4.825  | 48.312 | 3.000 |
| ATOM | 2340 | CZ3 | TRP | 179 | 6.398  | 47.050 | 3.748 |
| ATOM | 2341 | HZ3 | TRP | 179 | 5.928  | 46.127 | 3.408 |
| ATOM | 2342 | CE3 | TRP | 179 | 7.611  | 46.958 | 4.403 |
| ATOM | 2343 | HE3 | TRP | 179 | 8.047  | 45.970 | 4.552 |
| ATOM | 2344 | CD2 | TRP | 179 | 8.224  | 48.135 | 4.844 |
| ATOM | 2345 | C   | TRP | 179 | 10.960 | 45.495 | 7.490 |
| ATOM | 2346 | O   | TRP | 179 | 10.840 | 44.446 | 6.859 |
| ATOM | 2347 | N   | ALA | 180 | 11.911 | 45.657 | 8.427 |
| ATOM | 2348 | H   | ALA | 180 | 11.900 | 46.416 | 8.910 |
| ATOM | 2349 | CA  | ALA | 180 | 12.921 | 44.667 | 8.668 |
| ATOM | 2350 | HA  | ALA | 180 | 13.486 | 44.989 | 9.543 |
| ATOM | 2351 | CB  | ALA | 180 | 12.282 | 43.320 | 8.970 |
| ATOM | 2352 | HB1 | ALA | 180 | 11.720 | 42.980 | 8.100 |
| ATOM | 2353 | HB2 | ALA | 180 | 13.059 | 42.593 | 9.206 |
| ATOM | 2354 | HB3 | ALA | 180 | 11.608 | 43.420 | 9.821 |
| ATOM | 2355 | C   | ALA | 180 | 13.891 | 44.502 | 7.515 |
| ATOM | 2356 | O   | ALA | 180 | 14.320 | 43.368 | 7.301 |
| ATOM | 2357 | N   | PRO | 181 | 14.303 | 45.488 | 6.731 |
| ATOM | 2358 | CD  | PRO | 181 | 13.599 | 46.780 | 6.435 |
| ATOM | 2359 | HD2 | PRO | 181 | 13.943 | 47.567 | 7.106 |
| ATOM | 2360 | HD3 | PRO | 181 | 12.520 | 46.661 | 6.537 |
| ATOM | 2361 | CG  | PRO | 181 | 14.018 | 47.013 | 5.010 |
| ATOM | 2362 | HG2 | PRO | 181 | 14.032 | 48.084 | 4.806 |
| ATOM | 2363 | HG3 | PRO | 181 | 13.310 | 46.525 | 4.339 |
| ATOM | 2364 | CB  | PRO | 181 | 15.378 | 46.415 | 4.875 |
| ATOM | 2365 | HB2 | PRO | 181 | 16.101 | 47.144 | 5.240 |
| ATOM | 2366 | HB3 | PRO | 181 | 15.649 | 46.109 | 3.865 |
| ATOM | 2367 | CA  | PRO | 181 | 15.355 | 45.197 | 5.800 |
| ATOM | 2368 | HA  | PRO | 181 | 15.112 | 44.281 | 5.262 |
| ATOM | 2369 | C   | PRO | 181 | 16.654 | 45.021 | 6.524 |
| ATOM | 2370 | O   | PRO | 181 | 17.604 | 44.519 | 5.926 |
| ATOM | 2371 | N   | ARG | 182 | 16.717 | 45.461 | 7.794 |
| ATOM | 2372 | H   | ARG | 182 | 15.954 | 45.818 | 8.111 |
| ATOM | 2373 | CA  | ARG | 182 | 17.884 | 45.394 | 8.634 |
| ATOM | 2374 | HA  | ARG | 182 | 18.746 | 45.796 | 8.101 |
| ATOM | 2375 | CB  | ARG | 182 | 17.673 | 46.211 | 9.910 |
| ATOM | 2376 | HB2 | ARG | 182 | 17.412 | 47.224 | 9.603 |

|      |      |      |     |     |        |        |        |
|------|------|------|-----|-----|--------|--------|--------|
| ATOM | 2377 | HB3  | ARG | 182 | 16.832 | 45.765 | 10.442 |
| ATOM | 2378 | CG   | ARG | 182 | 18.885 | 46.256 | 10.826 |
| ATOM | 2379 | HG2  | ARG | 182 | 19.116 | 45.240 | 11.146 |
| ATOM | 2380 | HG3  | ARG | 182 | 19.728 | 46.661 | 10.266 |
| ATOM | 2381 | CD   | ARG | 182 | 18.624 | 47.124 | 12.046 |
| ATOM | 2382 | HD2  | ARG | 182 | 19.541 | 47.200 | 12.631 |
| ATOM | 2383 | HD3  | ARG | 182 | 18.321 | 48.118 | 11.716 |
| ATOM | 2384 | NE   | ARG | 182 | 17.571 | 46.572 | 12.895 |
| ATOM | 2385 | HE   | ARG | 182 | 16.783 | 46.907 | 12.811 |
| ATOM | 2386 | CZ   | ARG | 182 | 17.758 | 45.596 | 13.778 |
| ATOM | 2387 | NH1  | ARG | 182 | 16.741 | 45.157 | 14.506 |
| ATOM | 2388 | HH11 | ARG | 182 | 15.960 | 45.505 | 14.408 |
| ATOM | 2389 | HH12 | ARG | 182 | 16.861 | 44.526 | 15.077 |
| ATOM | 2390 | NH2  | ARG | 182 | 18.961 | 45.060 | 13.929 |
| ATOM | 2391 | HH21 | ARG | 182 | 19.621 | 45.344 | 13.456 |
| ATOM | 2392 | HH22 | ARG | 182 | 19.082 | 44.428 | 14.500 |
| ATOM | 2393 | C    | ARG | 182 | 18.278 | 43.992 | 9.022  |
| ATOM | 2394 | O    | ARG | 182 | 19.474 | 43.760 | 9.198  |
| ATOM | 2395 | N    | PRO | 183 | 17.400 | 43.027 | 9.165  |
| ATOM | 2396 | CD   | PRO | 183 | 15.898 | 43.094 | 9.023  |
| ATOM | 2397 | HD2  | PRO | 183 | 15.606 | 42.971 | 7.980  |
| ATOM | 2398 | HD3  | PRO | 183 | 15.520 | 44.046 | 9.396  |
| ATOM | 2399 | CG   | PRO | 183 | 15.477 | 41.934 | 9.881  |
| ATOM | 2400 | HG2  | PRO | 183 | 14.532 | 41.534 | 9.513  |
| ATOM | 2401 | HG3  | PRO | 183 | 15.352 | 42.270 | 10.910 |
| ATOM | 2402 | CB   | PRO | 183 | 16.572 | 40.926 | 9.779  |
| ATOM | 2403 | HB2  | PRO | 183 | 16.485 | 40.269 | 8.914  |
| ATOM | 2404 | HB3  | PRO | 183 | 16.592 | 40.326 | 10.689 |
| ATOM | 2405 | CA   | PRO | 183 | 17.851 | 41.758 | 9.674  |
| ATOM | 2406 | HA   | PRO | 183 | 18.275 | 41.975 | 10.655 |
| ATOM | 2407 | C    | PRO | 183 | 18.846 | 41.002 | 8.859  |
| ATOM | 2408 | O    | PRO | 183 | 18.887 | 41.159 | 7.640  |
| ATOM | 2409 | N    | GLY | 184 | 19.663 | 40.177 | 9.553  |
| ATOM | 2410 | H    | GLY | 184 | 19.536 | 40.142 | 10.443 |
| ATOM | 2411 | CA   | GLY | 184 | 20.690 | 39.382 | 8.943  |
| ATOM | 2412 | HA2  | GLY | 184 | 20.815 | 39.656 | 7.895  |
| ATOM | 2413 | HA3  | GLY | 184 | 21.637 | 39.512 | 9.467  |
| ATOM | 2414 | C    | GLY | 184 | 20.281 | 37.942 | 9.025  |
| ATOM | 2415 | O    | GLY | 184 | 19.455 | 37.559 | 9.850  |
| ATOM | 2416 | N    | ALA | 185 | 20.844 | 37.128 | 8.109  |
| ATOM | 2417 | H    | ALA | 185 | 21.417 | 37.568 | 7.572  |
| ATOM | 2418 | CA   | ALA | 185 | 20.626 | 35.717 | 7.927  |
| ATOM | 2419 | HA   | ALA | 185 | 19.547 | 35.567 | 7.896  |
| ATOM | 2420 | CB   | ALA | 185 | 21.219 | 35.255 | 6.605  |
| ATOM | 2421 | HB1  | ALA | 185 | 22.300 | 35.391 | 6.624  |
| ATOM | 2422 | HB2  | ALA | 185 | 20.988 | 34.201 | 6.451  |
| ATOM | 2423 | HB3  | ALA | 185 | 20.794 | 35.842 | 5.791  |
| ATOM | 2424 | C    | ALA | 185 | 21.190 | 34.863 | 9.028  |
| ATOM | 2425 | O    | ALA | 185 | 20.604 | 33.836 | 9.367  |
| ATOM | 2426 | N    | ALA | 186 | 22.347 | 35.248 | 9.604  |
| ATOM | 2427 | H    | ALA | 186 | 22.664 | 36.064 | 9.397  |
| ATOM | 2428 | CA   | ALA | 186 | 23.072 | 34.405 | 10.522 |

|      |      |     |     |     |        |        |        |
|------|------|-----|-----|-----|--------|--------|--------|
| ATOM | 2429 | HA  | ALA | 186 | 23.455 | 33.543 | 9.976  |
| ATOM | 2430 | CB  | ALA | 186 | 24.247 | 35.162 | 11.122 |
| ATOM | 2431 | HB1 | ALA | 186 | 23.879 | 36.023 | 11.680 |
| ATOM | 2432 | HB2 | ALA | 186 | 24.799 | 34.504 | 11.793 |
| ATOM | 2433 | HB3 | ALA | 186 | 24.907 | 35.502 | 10.324 |
| ATOM | 2434 | C   | ALA | 186 | 22.185 | 33.893 | 11.611 |
| ATOM | 2435 | O   | ALA | 186 | 21.250 | 34.548 | 12.068 |
| ATOM | 2436 | N   | PRO | 187 | 22.472 | 32.673 | 11.994 |
| ATOM | 2437 | CD  | PRO | 187 | 23.408 | 31.688 | 11.250 |
| ATOM | 2438 | HD2 | PRO | 187 | 24.445 | 31.837 | 11.550 |
| ATOM | 2439 | HD3 | PRO | 187 | 23.321 | 31.811 | 10.170 |
| ATOM | 2440 | CG  | PRO | 187 | 22.854 | 30.373 | 11.723 |
| ATOM | 2441 | HG2 | PRO | 187 | 23.647 | 29.625 | 11.728 |
| ATOM | 2442 | HG3 | PRO | 187 | 22.057 | 30.052 | 11.052 |
| ATOM | 2443 | CB  | PRO | 187 | 22.327 | 30.617 | 13.097 |
| ATOM | 2444 | HB2 | PRO | 187 | 23.143 | 30.596 | 13.820 |
| ATOM | 2445 | HB3 | PRO | 187 | 21.563 | 29.898 | 13.392 |
| ATOM | 2446 | CA  | PRO | 187 | 21.725 | 32.022 | 13.033 |
| ATOM | 2447 | HA  | PRO | 187 | 20.679 | 32.002 | 12.728 |
| ATOM | 2448 | C   | PRO | 187 | 21.845 | 32.709 | 14.353 |
| ATOM | 2449 | O   | PRO | 187 | 20.857 | 32.731 | 15.086 |
| ATOM | 2450 | N   | PRO | 188 | 22.987 | 33.234 | 14.701 |
| ATOM | 2451 | CD  | PRO | 188 | 24.348 | 32.957 | 14.086 |
| ATOM | 2452 | HD2 | PRO | 188 | 24.544 | 33.642 | 13.261 |
| ATOM | 2453 | HD3 | PRO | 188 | 24.406 | 31.930 | 13.727 |
| ATOM | 2454 | CG  | PRO | 188 | 25.245 | 33.203 | 15.266 |
| ATOM | 2455 | HG2 | PRO | 188 | 26.219 | 33.545 | 14.916 |
| ATOM | 2456 | HG3 | PRO | 188 | 25.367 | 32.277 | 15.828 |
| ATOM | 2457 | CB  | PRO | 188 | 24.567 | 34.243 | 16.093 |
| ATOM | 2458 | HB2 | PRO | 188 | 24.797 | 35.198 | 15.620 |
| ATOM | 2459 | HB3 | PRO | 188 | 24.835 | 34.287 | 17.149 |
| ATOM | 2460 | CA  | PRO | 188 | 23.075 | 33.936 | 15.946 |
| ATOM | 2461 | HA  | PRO | 188 | 22.702 | 33.312 | 16.758 |
| ATOM | 2462 | C   | PRO | 188 | 22.243 | 35.159 | 15.841 |
| ATOM | 2463 | O   | PRO | 188 | 21.632 | 35.571 | 16.827 |
| ATOM | 2464 | N   | ARG | 189 | 22.206 | 35.751 | 14.636 |
| ATOM | 2465 | H   | ARG | 189 | 22.672 | 35.415 | 13.943 |
| ATOM | 2466 | CA  | ARG | 189 | 21.420 | 36.920 | 14.462 |
| ATOM | 2467 | HA  | ARG | 189 | 21.695 | 37.665 | 15.209 |
| ATOM | 2468 | CB  | ARG | 189 | 21.647 | 37.516 | 13.071 |
| ATOM | 2469 | HB2 | ARG | 189 | 21.521 | 36.708 | 12.351 |
| ATOM | 2470 | HB3 | ARG | 189 | 20.873 | 38.267 | 12.913 |
| ATOM | 2471 | CG  | ARG | 189 | 23.014 | 38.152 | 12.884 |
| ATOM | 2472 | HG2 | ARG | 189 | 23.103 | 38.993 | 13.572 |
| ATOM | 2473 | HG3 | ARG | 189 | 23.777 | 37.410 | 13.118 |
| ATOM | 2474 | CD  | ARG | 189 | 23.205 | 38.642 | 11.457 |
| ATOM | 2475 | HD2 | ARG | 189 | 23.112 | 37.796 | 10.776 |
| ATOM | 2476 | HD3 | ARG | 189 | 22.434 | 39.378 | 11.228 |
| ATOM | 2477 | NE  | ARG | 189 | 24.514 | 39.259 | 11.261 |
| ATOM | 2478 | HE  | ARG | 189 | 24.988 | 39.406 | 11.965 |
| ATOM | 2479 | CZ  | ARG | 189 | 25.008 | 39.601 | 10.076 |
| ATOM | 2480 | NH1 | ARG | 189 | 26.209 | 40.158 | 9.994  |

|      |      |      |     |     |        |        |        |
|------|------|------|-----|-----|--------|--------|--------|
| ATOM | 2481 | HH11 | ARG | 189 | 26.668 | 40.297 | 10.707 |
| ATOM | 2482 | HH12 | ARG | 189 | 26.529 | 40.379 | 9.227  |
| ATOM | 2483 | NH2  | ARG | 189 | 24.301 | 39.386 | 8.975  |
| ATOM | 2484 | HH21 | ARG | 189 | 23.522 | 39.026 | 9.028  |
| ATOM | 2485 | HH22 | ARG | 189 | 24.621 | 39.608 | 8.208  |
| ATOM | 2486 | C    | ARG | 189 | 20.022 | 36.500 | 14.687 |
| ATOM | 2487 | O    | ARG | 189 | 19.356 | 37.106 | 15.506 |
| ATOM | 2488 | N    | VAL | 190 | 19.595 | 35.380 | 14.066 |
| ATOM | 2489 | H    | VAL | 190 | 20.233 | 34.921 | 13.628 |
| ATOM | 2490 | CA   | VAL | 190 | 18.235 | 34.901 | 14.067 |
| ATOM | 2491 | HA   | VAL | 190 | 17.545 | 35.657 | 13.692 |
| ATOM | 2492 | CB   | VAL | 190 | 18.084 | 33.629 | 13.212 |
| ATOM | 2493 | HB   | VAL | 190 | 18.840 | 32.905 | 13.517 |
| ATOM | 2494 | CG1  | VAL | 190 | 16.700 | 33.025 | 13.396 |
| ATOM | 2495 | HG11 | VAL | 190 | 15.944 | 33.748 | 13.091 |
| ATOM | 2496 | HG12 | VAL | 190 | 16.611 | 32.127 | 12.785 |
| ATOM | 2497 | HG13 | VAL | 190 | 16.552 | 32.766 | 14.445 |
| ATOM | 2498 | CG2  | VAL | 190 | 18.343 | 33.940 | 11.745 |
| ATOM | 2499 | HG21 | VAL | 190 | 19.355 | 34.327 | 11.628 |
| ATOM | 2500 | HG22 | VAL | 190 | 18.232 | 33.030 | 11.155 |
| ATOM | 2501 | HG23 | VAL | 190 | 17.627 | 34.686 | 11.399 |
| ATOM | 2502 | C    | VAL | 190 | 17.778 | 34.640 | 15.464 |
| ATOM | 2503 | O    | VAL | 190 | 16.609 | 34.848 | 15.788 |
| ATOM | 2504 | N    | HIE | 191 | 18.684 | 34.165 | 16.333 |
| ATOM | 2505 | H    | HIE | 191 | 19.532 | 34.027 | 16.065 |
| ATOM | 2506 | CA   | HIE | 191 | 18.304 | 33.879 | 17.682 |
| ATOM | 2507 | HA   | HIE | 191 | 17.490 | 33.154 | 17.690 |
| ATOM | 2508 | CB   | HIE | 191 | 19.486 | 33.296 | 18.460 |
| ATOM | 2509 | HB2  | HIE | 191 | 20.374 | 33.908 | 18.304 |
| ATOM | 2510 | HB3  | HIE | 191 | 19.254 | 33.259 | 19.524 |
| ATOM | 2511 | CG   | HIE | 191 | 19.849 | 31.902 | 18.052 |
| ATOM | 2512 | ND1  | HIE | 191 | 20.950 | 31.243 | 18.553 |
| ATOM | 2513 | CE1  | HIE | 191 | 21.014 | 30.017 | 18.004 |
| ATOM | 2514 | HE1  | HIE | 191 | 21.841 | 29.376 | 18.309 |
| ATOM | 2515 | NE2  | HIE | 191 | 20.021 | 29.807 | 17.162 |
| ATOM | 2516 | HE2  | HIE | 191 | 19.866 | 29.033 | 16.670 |
| ATOM | 2517 | CD2  | HIE | 191 | 19.289 | 30.905 | 17.150 |
| ATOM | 2518 | HD2  | HIE | 191 | 18.403 | 30.962 | 16.518 |
| ATOM | 2519 | C    | HIE | 191 | 17.811 | 35.166 | 18.268 |
| ATOM | 2520 | O    | HIE | 191 | 16.865 | 35.180 | 19.054 |
| ATOM | 2521 | N    | TYR | 192 | 18.445 | 36.287 | 17.876 |
| ATOM | 2522 | H    | TYR | 192 | 19.117 | 36.174 | 17.289 |
| ATOM | 2523 | CA   | TYR | 192 | 18.107 | 37.608 | 18.338 |
| ATOM | 2524 | HA   | TYR | 192 | 18.190 | 37.652 | 19.424 |
| ATOM | 2525 | CB   | TYR | 192 | 19.055 | 38.646 | 17.733 |
| ATOM | 2526 | HB2  | TYR | 192 | 19.110 | 38.450 | 16.662 |
| ATOM | 2527 | HB3  | TYR | 192 | 18.608 | 39.626 | 17.900 |
| ATOM | 2528 | CG   | TYR | 192 | 20.447 | 38.620 | 18.322 |
| ATOM | 2529 | CD1  | TYR | 192 | 21.437 | 37.817 | 17.770 |
| ATOM | 2530 | HD1  | TYR | 192 | 21.193 | 37.203 | 16.903 |
| ATOM | 2531 | CE1  | TYR | 192 | 22.713 | 37.787 | 18.301 |
| ATOM | 2532 | HE1  | TYR | 192 | 23.480 | 37.151 | 17.859 |



|      |      |      |     |     |        |        |        |
|------|------|------|-----|-----|--------|--------|--------|
| ATOM | 2533 | CZ   | TYR | 192 | 23.012 | 38.566 | 19.398 |
| ATOM | 2534 | OH   | TYR | 192 | 24.282 | 38.538 | 19.928 |
| ATOM | 2535 | HH   | TYR | 192 | 24.320 | 39.051 | 20.579 |
| ATOM | 2536 | CE2  | TYR | 192 | 22.037 | 39.382 | 19.971 |
| ATOM | 2537 | HE2  | TYR | 192 | 22.266 | 40.001 | 20.838 |
| ATOM | 2538 | CD2  | TYR | 192 | 20.767 | 39.399 | 19.426 |
| ATOM | 2539 | HD2  | TYR | 192 | 19.995 | 40.032 | 19.863 |
| ATOM | 2540 | C    | TYR | 192 | 16.681 | 37.952 | 18.001 |
| ATOM | 2541 | O    | TYR | 192 | 15.999 | 38.439 | 18.902 |
| ATOM | 2542 | N    | PRO | 193 | 16.142 | 37.768 | 16.810 |
| ATOM | 2543 | CD   | PRO | 193 | 16.851 | 37.640 | 15.470 |
| ATOM | 2544 | HD2  | PRO | 193 | 17.015 | 36.592 | 15.218 |
| ATOM | 2545 | HD3  | PRO | 193 | 17.807 | 38.163 | 15.487 |
| ATOM | 2546 | CG   | PRO | 193 | 15.851 | 38.302 | 14.564 |
| ATOM | 2547 | HG2  | PRO | 193 | 15.925 | 37.872 | 13.565 |
| ATOM | 2548 | HG3  | PRO | 193 | 16.058 | 39.371 | 14.514 |
| ATOM | 2549 | CB   | PRO | 193 | 14.511 | 38.046 | 15.170 |
| ATOM | 2550 | HB2  | PRO | 193 | 14.156 | 37.058 | 14.879 |
| ATOM | 2551 | HB3  | PRO | 193 | 13.768 | 38.794 | 14.895 |
| ATOM | 2552 | CA   | PRO | 193 | 14.759 | 38.086 | 16.679 |
| ATOM | 2553 | HA   | PRO | 193 | 14.604 | 39.084 | 17.090 |
| ATOM | 2554 | C    | PRO | 193 | 13.882 | 37.121 | 17.383 |
| ATOM | 2555 | O    | PRO | 193 | 12.768 | 37.494 | 17.743 |
| ATOM | 2556 | N    | ALA | 194 | 14.345 | 35.875 | 17.564 |
| ATOM | 2557 | H    | ALA | 194 | 15.167 | 35.655 | 17.271 |
| ATOM | 2558 | CA   | ALA | 194 | 13.535 | 34.898 | 18.220 |
| ATOM | 2559 | HA   | ALA | 194 | 12.550 | 34.828 | 17.759 |
| ATOM | 2560 | CB   | ALA | 194 | 14.199 | 33.531 | 18.158 |
| ATOM | 2561 | HB1  | ALA | 194 | 15.183 | 33.583 | 18.624 |
| ATOM | 2562 | HB2  | ALA | 194 | 13.584 | 32.803 | 18.688 |
| ATOM | 2563 | HB3  | ALA | 194 | 14.307 | 33.226 | 17.117 |
| ATOM | 2564 | C    | ALA | 194 | 13.320 | 35.346 | 19.626 |
| ATOM | 2565 | O    | ALA | 194 | 12.221 | 35.222 | 20.165 |
| ATOM | 2566 | N    | LEU | 195 | 14.375 | 35.901 | 20.252 |
| ATOM | 2567 | H    | LEU | 195 | 15.140 | 36.044 | 19.800 |
| ATOM | 2568 | CA   | LEU | 195 | 14.281 | 36.264 | 21.634 |
| ATOM | 2569 | HA   | LEU | 195 | 13.529 | 35.648 | 22.127 |
| ATOM | 2570 | CB   | LEU | 195 | 15.624 | 36.052 | 22.336 |
| ATOM | 2571 | HB2  | LEU | 195 | 16.313 | 36.689 | 21.781 |
| ATOM | 2572 | HB3  | LEU | 195 | 15.533 | 36.420 | 23.358 |
| ATOM | 2573 | CG   | LEU | 195 | 16.159 | 34.619 | 22.356 |
| ATOM | 2574 | HG   | LEU | 195 | 16.221 | 34.251 | 21.332 |
| ATOM | 2575 | CD1  | LEU | 195 | 17.538 | 34.569 | 22.997 |
| ATOM | 2576 | HD11 | LEU | 195 | 17.477 | 34.936 | 24.021 |
| ATOM | 2577 | HD12 | LEU | 195 | 17.900 | 33.541 | 23.001 |
| ATOM | 2578 | HD13 | LEU | 195 | 18.226 | 35.194 | 22.428 |
| ATOM | 2579 | CD2  | LEU | 195 | 15.200 | 33.696 | 23.092 |
| ATOM | 2580 | HD21 | LEU | 195 | 14.232 | 33.703 | 22.591 |
| ATOM | 2581 | HD22 | LEU | 195 | 15.600 | 32.682 | 23.094 |
| ATOM | 2582 | HD23 | LEU | 195 | 15.080 | 34.041 | 24.119 |
| ATOM | 2583 | C    | LEU | 195 | 13.839 | 37.685 | 21.782 |
| ATOM | 2584 | O    | LEU | 195 | 14.385 | 38.603 | 21.173 |

|      |      |      |     |     |        |        |        |
|------|------|------|-----|-----|--------|--------|--------|
| ATOM | 2585 | N    | LEU | 196 | 12.804 | 37.881 | 22.619 |
| ATOM | 2586 | H    | LEU | 196 | 12.422 | 37.143 | 22.965 |
| ATOM | 2587 | CA   | LEU | 196 | 12.304 | 39.178 | 22.969 |
| ATOM | 2588 | HA   | LEU | 196 | 12.139 | 39.766 | 22.066 |
| ATOM | 2589 | CB   | LEU | 196 | 10.978 | 39.056 | 23.722 |
| ATOM | 2590 | HB2  | LEU | 196 | 11.199 | 38.358 | 24.530 |
| ATOM | 2591 | HB3  | LEU | 196 | 10.737 | 40.033 | 24.142 |
| ATOM | 2592 | CG   | LEU | 196 | 9.785  | 38.540 | 22.915 |
| ATOM | 2593 | HG   | LEU | 196 | 10.060 | 37.596 | 22.444 |
| ATOM | 2594 | CD1  | LEU | 196 | 8.579  | 38.324 | 23.816 |
| ATOM | 2595 | HD11 | LEU | 196 | 8.303  | 39.267 | 24.287 |
| ATOM | 2596 | HD12 | LEU | 196 | 7.742  | 37.957 | 23.222 |
| ATOM | 2597 | HD13 | LEU | 196 | 8.826  | 37.593 | 24.585 |
| ATOM | 2598 | CD2  | LEU | 196 | 9.439  | 39.504 | 21.790 |
| ATOM | 2599 | HD21 | LEU | 196 | 10.296 | 39.608 | 21.124 |
| ATOM | 2600 | HD22 | LEU | 196 | 8.588  | 39.118 | 21.229 |
| ATOM | 2601 | HD23 | LEU | 196 | 9.185  | 40.477 | 22.210 |
| ATOM | 2602 | C    | LEU | 196 | 13.372 | 39.834 | 23.787 |
| ATOM | 2603 | O    | LEU | 196 | 13.521 | 41.055 | 23.787 |
| ATOM | 2604 | N    | ALA | 197 | 14.120 | 39.001 | 24.535 |
| ATOM | 2605 | H    | ALA | 197 | 13.926 | 38.128 | 24.435 |
| ATOM | 2606 | CA   | ALA | 197 | 15.157 | 39.405 | 25.437 |
| ATOM | 2607 | HA   | ALA | 197 | 14.742 | 40.119 | 26.148 |
| ATOM | 2608 | CB   | ALA | 197 | 15.687 | 38.205 | 26.207 |
| ATOM | 2609 | HB1  | ALA | 197 | 16.114 | 37.485 | 25.509 |
| ATOM | 2610 | HB2  | ALA | 197 | 16.456 | 38.532 | 26.907 |
| ATOM | 2611 | HB3  | ALA | 197 | 14.871 | 37.737 | 26.758 |
| ATOM | 2612 | C    | ALA | 197 | 16.283 | 40.086 | 24.712 |
| ATOM | 2613 | O    | ALA | 197 | 16.875 | 41.021 | 25.247 |
| ATOM | 2614 | N    | ALA | 198 | 16.633 | 39.636 | 23.491 |
| ATOM | 2615 | H    | ALA | 198 | 16.149 | 38.990 | 23.092 |
| ATOM | 2616 | CA   | ALA | 198 | 17.783 | 40.190 | 22.824 |
| ATOM | 2617 | HA   | ALA | 198 | 18.514 | 40.484 | 23.577 |
| ATOM | 2618 | CB   | ALA | 198 | 18.417 | 39.153 | 21.910 |
| ATOM | 2619 | HB1  | ALA | 198 | 17.700 | 38.856 | 21.145 |
| ATOM | 2620 | HB2  | ALA | 198 | 19.300 | 39.579 | 21.434 |
| ATOM | 2621 | HB3  | ALA | 198 | 18.706 | 38.280 | 22.495 |
| ATOM | 2622 | C    | ALA | 198 | 17.425 | 41.416 | 22.035 |
| ATOM | 2623 | O    | ALA | 198 | 16.577 | 41.386 | 21.146 |
| ATOM | 2624 | N    | ALA | 199 | 18.005 | 42.547 | 22.483 |
| ATOM | 2625 | H    | ALA | 199 | 18.438 | 42.338 | 23.244 |
| ATOM | 2626 | CA   | ALA | 199 | 18.036 | 43.899 | 21.985 |
| ATOM | 2627 | HA   | ALA | 199 | 17.038 | 44.075 | 21.583 |
| ATOM | 2628 | CB   | ALA | 199 | 18.282 | 44.878 | 23.123 |
| ATOM | 2629 | HB1  | ALA | 199 | 19.281 | 44.720 | 23.529 |
| ATOM | 2630 | HB2  | ALA | 199 | 18.200 | 45.899 | 22.749 |
| ATOM | 2631 | HB3  | ALA | 199 | 17.542 | 44.718 | 23.907 |
| ATOM | 2632 | C    | ALA | 199 | 19.051 | 44.196 | 20.916 |
| ATOM | 2633 | O    | ALA | 199 | 18.941 | 45.233 | 20.269 |
| ATOM | 2634 | N    | ALA | 200 | 20.136 | 43.401 | 20.794 |
| ATOM | 2635 | H    | ALA | 200 | 20.157 | 42.628 | 21.254 |
| ATOM | 2636 | CA   | ALA | 200 | 21.249 | 43.769 | 19.946 |

|      |      |      |     |     |        |        |        |
|------|------|------|-----|-----|--------|--------|--------|
| ATOM | 2637 | HA   | ALA | 200 | 21.714 | 44.656 | 20.375 |
| ATOM | 2638 | CB   | ALA | 200 | 22.279 | 42.650 | 19.908 |
| ATOM | 2639 | HB1  | ALA | 200 | 21.830 | 41.757 | 19.473 |
| ATOM | 2640 | HB2  | ALA | 200 | 23.131 | 42.960 | 19.303 |
| ATOM | 2641 | HB3  | ALA | 200 | 22.615 | 42.430 | 20.921 |
| ATOM | 2642 | C    | ALA | 200 | 20.827 | 44.099 | 18.549 |
| ATOM | 2643 | O    | ALA | 200 | 20.062 | 43.376 | 17.915 |
| ATOM | 2644 | N    | LEU | 201 | 21.364 | 45.219 | 18.017 |
| ATOM | 2645 | H    | LEU | 201 | 21.944 | 45.699 | 18.510 |
| ATOM | 2646 | CA   | LEU | 201 | 21.025 | 45.647 | 16.692 |
| ATOM | 2647 | HA   | LEU | 201 | 20.009 | 45.334 | 16.452 |
| ATOM | 2648 | CB   | LEU | 201 | 21.106 | 47.171 | 16.584 |
| ATOM | 2649 | HB2  | LEU | 201 | 22.148 | 47.395 | 16.813 |
| ATOM | 2650 | HB3  | LEU | 201 | 20.894 | 47.447 | 15.551 |
| ATOM | 2651 | CG   | LEU | 201 | 20.195 | 47.967 | 17.521 |
| ATOM | 2652 | HG   | LEU | 201 | 20.404 | 47.673 | 18.550 |
| ATOM | 2653 | CD1  | LEU | 201 | 20.434 | 49.460 | 17.363 |
| ATOM | 2654 | HD11 | LEU | 201 | 20.225 | 49.755 | 16.335 |
| ATOM | 2655 | HD12 | LEU | 201 | 19.776 | 50.007 | 18.038 |
| ATOM | 2656 | HD13 | LEU | 201 | 21.472 | 49.690 | 17.603 |
| ATOM | 2657 | CD2  | LEU | 201 | 18.734 | 47.635 | 17.259 |
| ATOM | 2658 | HD21 | LEU | 201 | 18.567 | 46.571 | 17.426 |
| ATOM | 2659 | HD22 | LEU | 201 | 18.103 | 48.211 | 17.935 |
| ATOM | 2660 | HD23 | LEU | 201 | 18.483 | 47.885 | 16.228 |
| ATOM | 2661 | C    | LEU | 201 | 21.966 | 44.964 | 15.754 |
| ATOM | 2662 | O    | LEU | 201 | 22.956 | 45.546 | 15.314 |
| ATOM | 2663 | N    | LEU | 202 | 21.662 | 43.700 | 15.405 |
| ATOM | 2664 | H    | LEU | 202 | 20.929 | 43.307 | 15.749 |
| ATOM | 2665 | CA   | LEU | 202 | 22.497 | 42.981 | 14.492 |
| ATOM | 2666 | HA   | LEU | 202 | 23.516 | 43.365 | 14.542 |
| ATOM | 2667 | CB   | LEU | 202 | 22.518 | 41.492 | 14.844 |
| ATOM | 2668 | HB2  | LEU | 202 | 21.489 | 41.276 | 15.132 |
| ATOM | 2669 | HB3  | LEU | 202 | 22.766 | 40.936 | 13.940 |
| ATOM | 2670 | CG   | LEU | 202 | 23.462 | 41.076 | 15.974 |
| ATOM | 2671 | HG   | LEU | 202 | 24.476 | 41.383 | 15.718 |
| ATOM | 2672 | CD1  | LEU | 202 | 23.051 | 41.728 | 17.285 |
| ATOM | 2673 | HD11 | LEU | 202 | 22.037 | 41.421 | 17.542 |
| ATOM | 2674 | HD12 | LEU | 202 | 23.735 | 41.419 | 18.075 |
| ATOM | 2675 | HD13 | LEU | 202 | 23.086 | 42.812 | 17.179 |
| ATOM | 2676 | CD2  | LEU | 202 | 23.489 | 39.562 | 16.122 |
| ATOM | 2677 | HD21 | LEU | 202 | 23.834 | 39.112 | 15.191 |
| ATOM | 2678 | HD22 | LEU | 202 | 24.166 | 39.287 | 16.931 |
| ATOM | 2679 | HD23 | LEU | 202 | 22.486 | 39.201 | 16.350 |
| ATOM | 2680 | C    | LEU | 202 | 21.929 | 43.257 | 13.144 |
| ATOM | 2681 | O    | LEU | 202 | 20.737 | 43.056 | 12.919 |
| ATOM | 2682 | N    | ALA | 203 | 22.767 | 43.722 | 12.200 |
| ATOM | 2683 | H    | ALA | 203 | 23.651 | 43.812 | 12.342 |
| ATOM | 2684 | CA   | ALA | 203 | 22.207 | 44.079 | 10.934 |
| ATOM | 2685 | HA   | ALA | 203 | 21.207 | 43.656 | 10.837 |
| ATOM | 2686 | CB   | ALA | 203 | 22.109 | 45.591 | 10.805 |
| ATOM | 2687 | HB1  | ALA | 203 | 23.104 | 46.029 | 10.891 |
| ATOM | 2688 | HB2  | ALA | 203 | 21.683 | 45.847 | 9.835  |

|      |      |      |     |     |        |        |        |
|------|------|------|-----|-----|--------|--------|--------|
| ATOM | 2689 | HB3  | ALA | 203 | 21.470 | 45.983 | 11.597 |
| ATOM | 2690 | C    | ALA | 203 | 23.036 | 43.505 | 9.838  |
| ATOM | 2691 | O    | ALA | 203 | 24.186 | 43.114 | 10.038 |
| ATOM | 2692 | N    | GLN | 204 | 22.425 | 43.407 | 8.641  |
| ATOM | 2693 | H    | GLN | 204 | 21.558 | 43.641 | 8.582  |
| ATOM | 2694 | CA   | GLN | 204 | 23.122 | 42.943 | 7.480  |
| ATOM | 2695 | HA   | GLN | 204 | 23.786 | 42.122 | 7.752  |
| ATOM | 2696 | CB   | GLN | 204 | 22.133 | 42.443 | 6.425  |
| ATOM | 2697 | HB2  | GLN | 204 | 22.711 | 41.911 | 5.669  |
| ATOM | 2698 | HB3  | GLN | 204 | 21.458 | 41.746 | 6.922  |
| ATOM | 2699 | CG   | GLN | 204 | 21.324 | 43.545 | 5.761  |
| ATOM | 2700 | HG2  | GLN | 204 | 20.743 | 44.062 | 6.525  |
| ATOM | 2701 | HG3  | GLN | 204 | 22.010 | 44.248 | 5.289  |
| ATOM | 2702 | CD   | GLN | 204 | 20.373 | 43.014 | 4.706  |
| ATOM | 2703 | OE1  | GLN | 204 | 19.975 | 41.850 | 4.745  |
| ATOM | 2704 | NE2  | GLN | 204 | 20.006 | 43.869 | 3.758  |
| ATOM | 2705 | HE21 | GLN | 204 | 19.443 | 43.605 | 3.108  |
| ATOM | 2706 | HE22 | GLN | 204 | 20.320 | 44.712 | 3.767  |
| ATOM | 2707 | C    | GLN | 204 | 23.946 | 44.088 | 6.992  |
| ATOM | 2708 | O    | GLN | 204 | 23.683 | 45.244 | 7.319  |
| ATOM | 2709 | N    | THR | 205 | 24.981 | 43.773 | 6.191  |
| ATOM | 2710 | H    | THR | 205 | 25.076 | 42.906 | 5.970  |
| ATOM | 2711 | CA   | THR | 205 | 25.909 | 44.745 | 5.693  |
| ATOM | 2712 | HA   | THR | 205 | 26.320 | 45.308 | 6.531  |
| ATOM | 2713 | CB   | THR | 205 | 27.070 | 44.079 | 4.931  |
| ATOM | 2714 | HB   | THR | 205 | 26.663 | 43.492 | 4.108  |
| ATOM | 2715 | CG2  | THR | 205 | 28.020 | 45.131 | 4.381  |
| ATOM | 2716 | HG21 | THR | 205 | 28.428 | 45.718 | 5.204  |
| ATOM | 2717 | HG22 | THR | 205 | 28.834 | 44.642 | 3.846  |
| ATOM | 2718 | HG23 | THR | 205 | 27.480 | 45.788 | 3.699  |
| ATOM | 2719 | OG1  | THR | 205 | 27.799 | 43.222 | 5.819  |
| ATOM | 2720 | HG1  | THR | 205 | 28.102 | 43.671 | 6.448  |
| ATOM | 2721 | C    | THR | 205 | 25.219 | 45.725 | 4.799  |
| ATOM | 2722 | O    | THR | 205 | 25.535 | 46.914 | 4.823  |
| ATOM | 2723 | N    | ALA | 206 | 24.258 | 45.264 | 3.979  |
| ATOM | 2724 | H    | ALA | 206 | 23.991 | 44.405 | 4.014  |
| ATOM | 2725 | CA   | ALA | 206 | 23.657 | 46.164 | 3.039  |
| ATOM | 2726 | HA   | ALA | 206 | 24.428 | 46.599 | 2.403  |
| ATOM | 2727 | CB   | ALA | 206 | 22.661 | 45.424 | 2.159  |
| ATOM | 2728 | HB1  | ALA | 206 | 21.878 | 44.990 | 2.781  |
| ATOM | 2729 | HB2  | ALA | 206 | 22.216 | 46.120 | 1.448  |
| ATOM | 2730 | HB3  | ALA | 206 | 23.174 | 44.630 | 1.616  |
| ATOM | 2731 | C    | ALA | 206 | 22.988 | 47.292 | 3.762  |
| ATOM | 2732 | O    | ALA | 206 | 23.177 | 48.454 | 3.404  |
| ATOM | 2733 | N    | LEU | 207 | 22.191 | 46.993 | 4.806  |
| ATOM | 2734 | H    | LEU | 207 | 22.085 | 46.144 | 5.084  |
| ATOM | 2735 | CA   | LEU | 207 | 21.505 | 48.059 | 5.477  |
| ATOM | 2736 | HA   | LEU | 207 | 21.021 | 48.705 | 4.745  |
| ATOM | 2737 | CB   | LEU | 207 | 20.436 | 47.500 | 6.418  |
| ATOM | 2738 | HB2  | LEU | 207 | 19.790 | 46.915 | 5.763  |
| ATOM | 2739 | HB3  | LEU | 207 | 20.927 | 46.837 | 7.130  |
| ATOM | 2740 | CG   | LEU | 207 | 19.595 | 48.529 | 7.176  |

|      |      |      |     |     |        |        |        |
|------|------|------|-----|-----|--------|--------|--------|
| ATOM | 2741 | HG   | LEU | 207 | 20.254 | 49.129 | 7.804  |
| ATOM | 2742 | CD1  | LEU | 207 | 18.854 | 49.437 | 6.207  |
| ATOM | 2743 | HD11 | LEU | 207 | 18.195 | 48.838 | 5.579  |
| ATOM | 2744 | HD12 | LEU | 207 | 18.262 | 50.161 | 6.767  |
| ATOM | 2745 | HD13 | LEU | 207 | 19.573 | 49.964 | 5.580  |
| ATOM | 2746 | CD2  | LEU | 207 | 18.613 | 47.837 | 8.110  |
| ATOM | 2747 | HD21 | LEU | 207 | 19.162 | 47.231 | 8.831  |
| ATOM | 2748 | HD22 | LEU | 207 | 18.025 | 48.586 | 8.639  |
| ATOM | 2749 | HD23 | LEU | 207 | 17.948 | 47.197 | 7.530  |
| ATOM | 2750 | C    | LEU | 207 | 22.488 | 48.901 | 6.230  |
| ATOM | 2751 | O    | LEU | 207 | 22.367 | 50.124 | 6.252  |
| ATOM | 2752 | N    | LEU | 208 | 23.495 | 48.272 | 6.863  |
| ATOM | 2753 | H    | LEU | 208 | 23.603 | 47.385 | 6.755  |
| ATOM | 2754 | CA   | LEU | 208 | 24.395 | 49.007 | 7.707  |
| ATOM | 2755 | HA   | LEU | 208 | 23.832 | 49.533 | 8.477  |
| ATOM | 2756 | CB   | LEU | 208 | 25.386 | 48.060 | 8.387  |
| ATOM | 2757 | HB2  | LEU | 208 | 25.787 | 47.466 | 7.566  |
| ATOM | 2758 | HB3  | LEU | 208 | 26.183 | 48.662 | 8.823  |
| ATOM | 2759 | CG   | LEU | 208 | 24.809 | 47.129 | 9.455  |
| ATOM | 2760 | HG   | LEU | 208 | 23.945 | 46.609 | 9.040  |
| ATOM | 2761 | CD1  | LEU | 208 | 25.848 | 46.111 | 9.899  |
| ATOM | 2762 | HD11 | LEU | 208 | 26.712 | 46.630 | 10.314 |
| ATOM | 2763 | HD12 | LEU | 208 | 25.417 | 45.459 | 10.659 |
| ATOM | 2764 | HD13 | LEU | 208 | 26.161 | 45.513 | 9.043  |
| ATOM | 2765 | CD2  | LEU | 208 | 24.306 | 47.926 | 10.649 |
| ATOM | 2766 | HD21 | LEU | 208 | 23.526 | 48.615 | 10.324 |
| ATOM | 2767 | HD22 | LEU | 208 | 23.900 | 47.244 | 11.396 |
| ATOM | 2768 | HD23 | LEU | 208 | 25.131 | 48.491 | 11.083 |
| ATOM | 2769 | C    | LEU | 208 | 25.110 | 50.037 | 6.887  |
| ATOM | 2770 | O    | LEU | 208 | 25.234 | 51.187 | 7.307  |
| ATOM | 2771 | N    | LEU | 209 | 25.619 | 49.655 | 5.701  |
| ATOM | 2772 | H    | LEU | 209 | 25.508 | 48.809 | 5.415  |
| ATOM | 2773 | CA   | LEU | 209 | 26.339 | 50.597 | 4.892  |
| ATOM | 2774 | HA   | LEU | 209 | 27.101 | 51.093 | 5.493  |
| ATOM | 2775 | CB   | LEU | 209 | 27.024 | 49.886 | 3.723  |
| ATOM | 2776 | HB2  | LEU | 209 | 27.697 | 49.177 | 4.205  |
| ATOM | 2777 | HB3  | LEU | 209 | 26.261 | 49.342 | 3.167  |
| ATOM | 2778 | CG   | LEU | 209 | 27.820 | 50.772 | 2.763  |
| ATOM | 2779 | HG   | LEU | 209 | 27.148 | 51.508 | 2.323  |
| ATOM | 2780 | CD1  | LEU | 209 | 28.943 | 51.487 | 3.499  |
| ATOM | 2781 | HD11 | LEU | 209 | 29.616 | 50.751 | 3.939  |
| ATOM | 2782 | HD12 | LEU | 209 | 29.497 | 52.112 | 2.799  |
| ATOM | 2783 | HD13 | LEU | 209 | 28.522 | 52.111 | 4.287  |
| ATOM | 2784 | CD2  | LEU | 209 | 28.381 | 49.951 | 1.613  |
| ATOM | 2785 | HD21 | LEU | 209 | 27.562 | 49.486 | 1.065  |
| ATOM | 2786 | HD22 | LEU | 209 | 28.943 | 50.601 | 0.942  |
| ATOM | 2787 | HD23 | LEU | 209 | 29.040 | 49.177 | 2.006  |
| ATOM | 2788 | C    | LEU | 209 | 25.413 | 51.662 | 4.391  |
| ATOM | 2789 | O    | LEU | 209 | 25.730 | 52.849 | 4.456  |
| ATOM | 2790 | N    | HIE | 210 | 24.230 | 51.260 | 3.887  |
| ATOM | 2791 | H    | HIE | 210 | 24.021 | 50.386 | 3.934  |
| ATOM | 2792 | CA   | HIE | 210 | 23.311 | 52.187 | 3.286  |

|      |      |     |     |     |        |        |        |
|------|------|-----|-----|-----|--------|--------|--------|
| ATOM | 2793 | HA  | HIE | 210 | 23.823 | 52.770 | 2.521  |
| ATOM | 2794 | CB  | HIE | 210 | 22.146 | 51.440 | 2.634  |
| ATOM | 2795 | HB2 | HIE | 210 | 22.520 | 50.753 | 1.875  |
| ATOM | 2796 | HB3 | HIE | 210 | 21.590 | 50.882 | 3.387  |
| ATOM | 2797 | CG  | HIE | 210 | 21.160 | 52.336 | 1.951  |
| ATOM | 2798 | ND1 | HIE | 210 | 21.444 | 52.994 | 0.774  |
| ATOM | 2799 | CE1 | HIE | 210 | 20.371 | 53.718 | 0.407  |
| ATOM | 2800 | HE1 | HIE | 210 | 20.449 | 54.296 | -0.514 |
| ATOM | 2801 | NE2 | HIE | 210 | 19.379 | 53.588 | 1.266  |
| ATOM | 2802 | HE2 | HIE | 210 | 18.545 | 53.996 | 1.214  |
| ATOM | 2803 | CD2 | HIE | 210 | 19.796 | 52.770 | 2.213  |
| ATOM | 2804 | HD2 | HIE | 210 | 19.135 | 52.512 | 3.040  |
| ATOM | 2805 | C   | HIE | 210 | 22.793 | 53.167 | 4.295  |
| ATOM | 2806 | O   | HIE | 210 | 22.767 | 54.370 | 4.039  |
| ATOM | 2807 | N   | CYS | 211 | 22.367 | 52.680 | 5.475  |
| ATOM | 2808 | H   | CYS | 211 | 22.449 | 51.797 | 5.630  |
| ATOM | 2809 | CA  | CYS | 211 | 21.791 | 53.536 | 6.477  |
| ATOM | 2810 | HA  | CYS | 211 | 20.963 | 54.101 | 6.049  |
| ATOM | 2811 | CB  | CYS | 211 | 21.263 | 52.708 | 7.650  |
| ATOM | 2812 | HB2 | CYS | 211 | 20.550 | 51.963 | 7.296  |
| ATOM | 2813 | HB3 | CYS | 211 | 22.086 | 52.209 | 8.161  |
| ATOM | 2814 | SG  | CYS | 211 | 20.398 | 53.669 | 8.913  |
| ATOM | 2815 | HG  | CYS | 211 | 20.117 | 52.638 | 9.704  |
| ATOM | 2816 | C   | CYS | 211 | 22.813 | 54.524 | 6.939  |
| ATOM | 2817 | O   | CYS | 211 | 22.520 | 55.708 | 7.103  |
| ATOM | 2818 | N   | TYR | 212 | 24.052 | 54.051 | 7.144  |
| ATOM | 2819 | H   | TYR | 212 | 24.207 | 53.184 | 6.959  |
| ATOM | 2820 | CA  | TYR | 212 | 25.110 | 54.877 | 7.639  |
| ATOM | 2821 | HA  | TYR | 212 | 24.810 | 55.337 | 8.581  |
| ATOM | 2822 | CB  | TYR | 212 | 26.371 | 54.045 | 7.881  |
| ATOM | 2823 | HB2 | TYR | 212 | 26.536 | 53.441 | 6.989  |
| ATOM | 2824 | HB3 | TYR | 212 | 27.199 | 54.743 | 8.005  |
| ATOM | 2825 | CG  | TYR | 212 | 26.287 | 53.143 | 9.091  |
| ATOM | 2826 | CD1 | TYR | 212 | 26.960 | 51.928 | 9.121  |
| ATOM | 2827 | HD1 | TYR | 212 | 27.552 | 51.633 | 8.254  |
| ATOM | 2828 | CE1 | TYR | 212 | 26.889 | 51.098 | 10.224 |
| ATOM | 2829 | HE1 | TYR | 212 | 27.423 | 50.148 | 10.234 |
| ATOM | 2830 | CZ  | TYR | 212 | 26.138 | 51.477 | 11.315 |
| ATOM | 2831 | OH  | TYR | 212 | 26.066 | 50.651 | 12.413 |
| ATOM | 2832 | HH  | TYR | 212 | 25.583 | 51.002 | 12.990 |
| ATOM | 2833 | CE2 | TYR | 212 | 25.452 | 52.691 | 11.311 |
| ATOM | 2834 | HE2 | TYR | 212 | 24.856 | 52.998 | 12.170 |
| ATOM | 2835 | CD2 | TYR | 212 | 25.535 | 53.509 | 10.200 |
| ATOM | 2836 | HD2 | TYR | 212 | 25.004 | 54.461 | 10.183 |
| ATOM | 2837 | C   | TYR | 212 | 25.386 | 55.985 | 6.677  |
| ATOM | 2838 | O   | TYR | 212 | 25.584 | 57.128 | 7.086  |
| ATOM | 2839 | N   | LEU | 213 | 25.430 | 55.670 | 5.371  |
| ATOM | 2840 | H   | LEU | 213 | 25.270 | 54.824 | 5.109  |
| ATOM | 2841 | CA  | LEU | 213 | 25.730 | 56.677 | 4.398  |
| ATOM | 2842 | HA  | LEU | 213 | 26.648 | 57.196 | 4.674  |
| ATOM | 2843 | CB  | LEU | 213 | 25.921 | 56.047 | 3.017  |
| ATOM | 2844 | HB2 | LEU | 213 | 26.757 | 55.362 | 3.154  |

|      |      |      |     |     |        |        |        |
|------|------|------|-----|-----|--------|--------|--------|
| ATOM | 2845 | HB3  | LEU | 213 | 25.022 | 55.479 | 2.779  |
| ATOM | 2846 | CG   | LEU | 213 | 26.234 | 57.011 | 1.870  |
| ATOM | 2847 | HG   | LEU | 213 | 25.414 | 57.722 | 1.773  |
| ATOM | 2848 | CD1  | LEU | 213 | 27.528 | 57.764 | 2.139  |
| ATOM | 2849 | HD11 | LEU | 213 | 28.349 | 57.054 | 2.236  |
| ATOM | 2850 | HD12 | LEU | 213 | 27.732 | 58.444 | 1.312  |
| ATOM | 2851 | HD13 | LEU | 213 | 27.431 | 58.335 | 3.062  |
| ATOM | 2852 | CD2  | LEU | 213 | 26.323 | 56.263 | 0.549  |
| ATOM | 2853 | HD21 | LEU | 213 | 25.372 | 55.770 | 0.345  |
| ATOM | 2854 | HD22 | LEU | 213 | 26.546 | 56.966 | -0.253 |
| ATOM | 2855 | HD23 | LEU | 213 | 27.114 | 55.516 | 0.607  |
| ATOM | 2856 | C    | LEU | 213 | 24.635 | 57.699 | 4.369  |
| ATOM | 2857 | O    | LEU | 213 | 24.895 | 58.901 | 4.397  |
| ATOM | 2858 | N    | GLY | 214 | 23.370 | 57.238 | 4.328  |
| ATOM | 2859 | H    | GLY | 214 | 23.234 | 56.350 | 4.386  |
| ATOM | 2860 | CA   | GLY | 214 | 22.254 | 58.127 | 4.195  |
| ATOM | 2861 | HA2  | GLY | 214 | 22.404 | 58.745 | 3.310  |
| ATOM | 2862 | HA3  | GLY | 214 | 21.348 | 57.534 | 4.074  |
| ATOM | 2863 | C    | GLY | 214 | 22.099 | 59.014 | 5.386  |
| ATOM | 2864 | O    | GLY | 214 | 21.860 | 60.211 | 5.230  |
| ATOM | 2865 | N    | ILE | 215 | 22.197 | 58.483 | 6.621  |
| ATOM | 2866 | H    | ILE | 215 | 22.399 | 57.635 | 6.846  |
| ATOM | 2867 | CA   | ILE | 215 | 21.933 | 59.449 | 7.641  |
| ATOM | 2868 | HA   | ILE | 215 | 21.710 | 60.431 | 7.224  |
| ATOM | 2869 | CB   | ILE | 215 | 20.775 | 59.004 | 8.553  |
| ATOM | 2870 | HB   | ILE | 215 | 20.671 | 59.719 | 9.369  |
| ATOM | 2871 | CG2  | ILE | 215 | 19.474 | 58.938 | 7.768  |
| ATOM | 2872 | HG21 | ILE | 215 | 19.577 | 58.222 | 6.952  |
| ATOM | 2873 | HG22 | ILE | 215 | 18.666 | 58.622 | 8.428  |
| ATOM | 2874 | HG23 | ILE | 215 | 19.245 | 59.922 | 7.360  |
| ATOM | 2875 | CG1  | ILE | 215 | 21.106 | 57.669 | 9.223  |
| ATOM | 2876 | HG12 | ILE | 215 | 21.080 | 56.903 | 8.448  |
| ATOM | 2877 | HG13 | ILE | 215 | 22.118 | 57.748 | 9.621  |
| ATOM | 2878 | CD1  | ILE | 215 | 20.154 | 57.292 | 10.337 |
| ATOM | 2879 | HD11 | ILE | 215 | 19.142 | 57.212 | 9.939  |
| ATOM | 2880 | HD12 | ILE | 215 | 20.453 | 56.334 | 10.763 |
| ATOM | 2881 | HD13 | ILE | 215 | 20.180 | 58.058 | 11.112 |
| ATOM | 2882 | C    | ILE | 215 | 23.141 | 59.733 | 8.482  |
| ATOM | 2883 | O    | ILE | 215 | 23.029 | 60.047 | 9.668  |
| ATOM | 2884 | N    | VAL | 216 | 24.338 | 59.749 | 7.875  |
| ATOM | 2885 | H    | VAL | 216 | 24.434 | 59.619 | 6.990  |
| ATOM | 2886 | CA   | VAL | 216 | 25.489 | 59.984 | 8.693  |
| ATOM | 2887 | HA   | VAL | 216 | 25.292 | 60.740 | 9.453  |
| ATOM | 2888 | CB   | VAL | 216 | 25.958 | 58.694 | 9.392  |
| ATOM | 2889 | HB   | VAL | 216 | 26.111 | 57.919 | 8.641  |
| ATOM | 2890 | CG1  | VAL | 216 | 27.259 | 58.937 | 10.141 |
| ATOM | 2891 | HG11 | VAL | 216 | 27.107 | 59.711 | 10.893 |
| ATOM | 2892 | HG12 | VAL | 216 | 27.576 | 58.015 | 10.629 |
| ATOM | 2893 | HG13 | VAL | 216 | 28.028 | 59.259 | 9.439  |
| ATOM | 2894 | CG2  | VAL | 216 | 24.883 | 58.180 | 10.337 |
| ATOM | 2895 | HG21 | VAL | 216 | 23.975 | 57.967 | 9.773  |
| ATOM | 2896 | HG22 | VAL | 216 | 25.231 | 57.268 | 10.822 |

|      |      |      |     |     |        |        |        |
|------|------|------|-----|-----|--------|--------|--------|
| ATOM | 2897 | HG23 | VAL | 216 | 24.672 | 58.936 | 11.093 |
| ATOM | 2898 | C    | VAL | 216 | 26.573 | 60.558 | 7.841  |
| ATOM | 2899 | O    | VAL | 216 | 26.821 | 61.762 | 7.848  |
| ATOM | 2900 | N    | ARG | 217 | 27.258 | 59.684 | 7.082  |
| ATOM | 2901 | H    | ARG | 217 | 26.970 | 58.832 | 7.050  |
| ATOM | 2902 | CA   | ARG | 217 | 28.417 | 60.077 | 6.336  |
| ATOM | 2903 | HA   | ARG | 217 | 29.177 | 60.467 | 7.013  |
| ATOM | 2904 | CB   | ARG | 217 | 29.001 | 58.880 | 5.583  |
| ATOM | 2905 | HB2  | ARG | 217 | 28.180 | 58.408 | 5.044  |
| ATOM | 2906 | HB3  | ARG | 217 | 29.726 | 59.272 | 4.869  |
| ATOM | 2907 | CG   | ARG | 217 | 29.676 | 57.853 | 6.478  |
| ATOM | 2908 | HG2  | ARG | 217 | 30.333 | 58.376 | 7.173  |
| ATOM | 2909 | HG3  | ARG | 217 | 28.907 | 57.320 | 7.037  |
| ATOM | 2910 | CD   | ARG | 217 | 30.489 | 56.860 | 5.663  |
| ATOM | 2911 | HD2  | ARG | 217 | 31.223 | 57.405 | 5.070  |
| ATOM | 2912 | HD3  | ARG | 217 | 31.004 | 56.180 | 6.342  |
| ATOM | 2913 | NE   | ARG | 217 | 29.649 | 56.074 | 4.762  |
| ATOM | 2914 | HE   | ARG | 217 | 29.541 | 56.376 | 3.963  |
| ATOM | 2915 | CZ   | ARG | 217 | 29.051 | 54.936 | 5.100  |
| ATOM | 2916 | NH1  | ARG | 217 | 28.306 | 54.290 | 4.214  |
| ATOM | 2917 | HH11 | ARG | 217 | 28.210 | 54.607 | 3.421  |
| ATOM | 2918 | HH12 | ARG | 217 | 27.920 | 53.554 | 4.433  |
| ATOM | 2919 | NH2  | ARG | 217 | 29.200 | 54.447 | 6.324  |
| ATOM | 2920 | HH21 | ARG | 217 | 29.684 | 54.867 | 6.899  |
| ATOM | 2921 | HH22 | ARG | 217 | 28.814 | 53.711 | 6.543  |
| ATOM | 2922 | C    | ARG | 217 | 28.107 | 61.180 | 5.371  |
| ATOM | 2923 | O    | ARG | 217 | 28.875 | 62.135 | 5.273  |
| ATOM | 2924 | N    | ARG | 218 | 26.990 | 61.093 | 4.626  |
| ATOM | 2925 | H    | ARG | 218 | 26.418 | 60.408 | 4.743  |
| ATOM | 2926 | CA   | ARG | 218 | 26.712 | 62.102 | 3.639  |
| ATOM | 2927 | HA   | ARG | 218 | 27.570 | 62.216 | 2.976  |
| ATOM | 2928 | CB   | ARG | 218 | 25.494 | 61.710 | 2.800  |
| ATOM | 2929 | HB2  | ARG | 218 | 25.712 | 60.741 | 2.350  |
| ATOM | 2930 | HB3  | ARG | 218 | 24.651 | 61.611 | 3.484  |
| ATOM | 2931 | CG   | ARG | 218 | 25.145 | 62.708 | 1.708  |
| ATOM | 2932 | HG2  | ARG | 218 | 25.018 | 63.690 | 2.163  |
| ATOM | 2933 | HG3  | ARG | 218 | 25.968 | 62.743 | 0.994  |
| ATOM | 2934 | CD   | ARG | 218 | 23.866 | 62.314 | 0.988  |
| ATOM | 2935 | HD2  | ARG | 218 | 23.689 | 63.011 | 0.169  |
| ATOM | 2936 | HD3  | ARG | 218 | 23.981 | 61.306 | 0.589  |
| ATOM | 2937 | NE   | ARG | 218 | 22.708 | 62.336 | 1.879  |
| ATOM | 2938 | HE   | ARG | 218 | 22.423 | 61.577 | 2.170  |
| ATOM | 2939 | CZ   | ARG | 218 | 22.078 | 63.443 | 2.259  |
| ATOM | 2940 | NH1  | ARG | 218 | 21.034 | 63.365 | 3.072  |
| ATOM | 2941 | HH11 | ARG | 218 | 20.763 | 62.599 | 3.353  |
| ATOM | 2942 | HH12 | ARG | 218 | 20.626 | 64.082 | 3.318  |
| ATOM | 2943 | NH2  | ARG | 218 | 22.495 | 64.624 | 1.826  |
| ATOM | 2944 | HH21 | ARG | 218 | 23.173 | 64.674 | 1.299  |
| ATOM | 2945 | HH22 | ARG | 218 | 22.088 | 65.341 | 2.072  |
| ATOM | 2946 | C    | ARG | 218 | 26.486 | 63.441 | 4.279  |
| ATOM | 2947 | O    | ARG | 218 | 27.061 | 64.438 | 3.847  |
| ATOM | 2948 | N    | VAL | 219 | 25.656 | 63.503 | 5.339  |



|      |      |      |     |     |        |        |        |
|------|------|------|-----|-----|--------|--------|--------|
| ATOM | 2949 | H    | VAL | 219 | 25.278 | 62.747 | 5.649  |
| ATOM | 2950 | CA   | VAL | 219 | 25.372 | 64.760 | 5.973  |
| ATOM | 2951 | HA   | VAL | 219 | 25.070 | 65.516 | 5.248  |
| ATOM | 2952 | CB   | VAL | 219 | 24.261 | 64.621 | 7.030  |
| ATOM | 2953 | HB   | VAL | 219 | 24.511 | 63.799 | 7.701  |
| ATOM | 2954 | CG1  | VAL | 219 | 24.125 | 65.906 | 7.832  |
| ATOM | 2955 | HG11 | VAL | 219 | 23.875 | 66.728 | 7.162  |
| ATOM | 2956 | HG12 | VAL | 219 | 23.335 | 65.790 | 8.574  |
| ATOM | 2957 | HG13 | VAL | 219 | 25.067 | 66.122 | 8.336  |
| ATOM | 2958 | CG2  | VAL | 219 | 22.940 | 64.257 | 6.370  |
| ATOM | 2959 | HG21 | VAL | 219 | 23.046 | 63.309 | 5.842  |
| ATOM | 2960 | HG22 | VAL | 219 | 22.166 | 64.163 | 7.132  |
| ATOM | 2961 | HG23 | VAL | 219 | 22.659 | 65.037 | 5.663  |
| ATOM | 2962 | C    | VAL | 219 | 26.630 | 65.287 | 6.583  |
| ATOM | 2963 | O    | VAL | 219 | 26.900 | 66.486 | 6.527  |
| ATOM | 2964 | N    | ARG | 220 | 27.436 | 64.393 | 7.187  |
| ATOM | 2965 | H    | ARG | 220 | 27.209 | 63.522 | 7.182  |
| ATOM | 2966 | CA   | ARG | 220 | 28.645 | 64.816 | 7.833  |
| ATOM | 2967 | HA   | ARG | 220 | 28.418 | 65.580 | 8.577  |
| ATOM | 2968 | CB   | ARG | 220 | 29.319 | 63.635 | 8.535  |
| ATOM | 2969 | HB2  | ARG | 220 | 28.583 | 63.200 | 9.211  |
| ATOM | 2970 | HB3  | ARG | 220 | 29.578 | 62.908 | 7.765  |
| ATOM | 2971 | CG   | ARG | 220 | 30.567 | 64.009 | 9.318  |
| ATOM | 2972 | HG2  | ARG | 220 | 31.302 | 64.419 | 8.625  |
| ATOM | 2973 | HG3  | ARG | 220 | 30.301 | 64.767 | 10.055 |
| ATOM | 2974 | CD   | ARG | 220 | 31.157 | 62.800 | 10.026 |
| ATOM | 2975 | HD2  | ARG | 220 | 30.401 | 62.370 | 10.683 |
| ATOM | 2976 | HD3  | ARG | 220 | 31.452 | 62.062 | 9.281  |
| ATOM | 2977 | NE   | ARG | 220 | 32.328 | 63.152 | 10.826 |
| ATOM | 2978 | HE   | ARG | 220 | 32.197 | 63.319 | 11.660 |
| ATOM | 2979 | CZ   | ARG | 220 | 33.565 | 63.228 | 10.346 |
| ATOM | 2980 | NH1  | ARG | 220 | 34.568 | 63.555 | 11.148 |
| ATOM | 2981 | HH11 | ARG | 220 | 34.419 | 63.719 | 11.979 |
| ATOM | 2982 | HH12 | ARG | 220 | 35.369 | 63.605 | 10.838 |
| ATOM | 2983 | NH2  | ARG | 220 | 33.795 | 62.976 | 9.065  |
| ATOM | 2984 | HH21 | ARG | 220 | 33.145 | 62.764 | 8.544  |
| ATOM | 2985 | HH22 | ARG | 220 | 34.596 | 63.026 | 8.754  |
| ATOM | 2986 | C    | ARG | 220 | 29.568 | 65.434 | 6.829  |
| ATOM | 2987 | O    | ARG | 220 | 30.181 | 66.464 | 7.103  |
| ATOM | 2988 | N    | VAL | 221 | 29.695 | 64.816 | 5.640  |
| ATOM | 2989 | H    | VAL | 221 | 29.201 | 64.080 | 5.484  |
| ATOM | 2990 | CA   | VAL | 221 | 30.593 | 65.305 | 4.632  |
| ATOM | 2991 | HA   | VAL | 221 | 31.594 | 65.467 | 5.032  |
| ATOM | 2992 | CB   | VAL | 221 | 30.690 | 64.332 | 3.442  |
| ATOM | 2993 | HB   | VAL | 221 | 29.684 | 64.088 | 3.101  |
| ATOM | 2994 | CG1  | VAL | 221 | 31.473 | 64.962 | 2.301  |
| ATOM | 2995 | HG11 | VAL | 221 | 32.479 | 65.206 | 2.641  |
| ATOM | 2996 | HG12 | VAL | 221 | 31.531 | 64.260 | 1.469  |
| ATOM | 2997 | HG13 | VAL | 221 | 30.970 | 65.872 | 1.974  |
| ATOM | 2998 | CG2  | VAL | 221 | 31.332 | 63.023 | 3.875  |
| ATOM | 2999 | HG21 | VAL | 221 | 30.730 | 62.564 | 4.659  |
| ATOM | 3000 | HG22 | VAL | 221 | 31.392 | 62.348 | 3.022  |

|      |      |      |     |     |        |        |        |
|------|------|------|-----|-----|--------|--------|--------|
| ATOM | 3001 | HG23 | VAL | 221 | 32.335 | 63.218 | 4.255  |
| ATOM | 3002 | C    | VAL | 221 | 30.146 | 66.657 | 4.170  |
| ATOM | 3003 | O    | VAL | 221 | 30.961 | 67.566 | 4.013  |
| ATOM | 3004 | N    | SER | 222 | 28.831 | 66.823 | 3.937  |
| ATOM | 3005 | H    | SER | 222 | 28.277 | 66.133 | 4.101  |
| ATOM | 3006 | CA   | SER | 222 | 28.306 | 68.062 | 3.439  |
| ATOM | 3007 | HA   | SER | 222 | 28.846 | 68.357 | 2.539  |
| ATOM | 3008 | CB   | SER | 222 | 26.823 | 67.915 | 3.093  |
| ATOM | 3009 | HB2  | SER | 222 | 26.297 | 67.535 | 3.968  |
| ATOM | 3010 | HB3  | SER | 222 | 26.427 | 68.896 | 2.829  |
| ATOM | 3011 | OG   | SER | 222 | 26.638 | 67.024 | 2.007  |
| ATOM | 3012 | HG   | SER | 222 | 26.940 | 66.277 | 2.208  |
| ATOM | 3013 | C    | SER | 222 | 28.516 | 69.133 | 4.461  |
| ATOM | 3014 | O    | SER | 222 | 28.880 | 70.258 | 4.122  |
| ATOM | 3015 | N    | VAL | 223 | 28.298 | 68.804 | 5.748  |
| ATOM | 3016 | H    | VAL | 223 | 28.064 | 67.959 | 5.950  |
| ATOM | 3017 | CA   | VAL | 223 | 28.433 | 69.778 | 6.790  |
| ATOM | 3018 | HA   | VAL | 223 | 27.842 | 70.670 | 6.582  |
| ATOM | 3019 | CB   | VAL | 223 | 28.001 | 69.209 | 8.154  |
| ATOM | 3020 | HB   | VAL | 223 | 28.513 | 68.261 | 8.321  |
| ATOM | 3021 | CG1  | VAL | 223 | 28.353 | 70.178 | 9.272  |
| ATOM | 3022 | HG11 | VAL | 223 | 27.841 | 71.126 | 9.106  |
| ATOM | 3023 | HG12 | VAL | 223 | 28.040 | 69.759 | 10.228 |
| ATOM | 3024 | HG13 | VAL | 223 | 29.430 | 70.344 | 9.284  |
| ATOM | 3025 | CG2  | VAL | 223 | 26.510 | 68.907 | 8.157  |
| ATOM | 3026 | HG21 | VAL | 223 | 26.285 | 68.175 | 7.381  |
| ATOM | 3027 | HG22 | VAL | 223 | 26.222 | 68.506 | 9.129  |
| ATOM | 3028 | HG23 | VAL | 223 | 25.953 | 69.824 | 7.963  |
| ATOM | 3029 | C    | VAL | 223 | 29.852 | 70.246 | 6.828  |
| ATOM | 3030 | O    | VAL | 223 | 30.112 | 71.443 | 6.917  |
| ATOM | 3031 | N    | LYS | 224 | 30.810 | 69.304 | 6.755  |
| ATOM | 3032 | H    | LYS | 224 | 30.554 | 68.447 | 6.654  |
| ATOM | 3033 | CA   | LYS | 224 | 32.205 | 69.631 | 6.834  |
| ATOM | 3034 | HA   | LYS | 224 | 32.398 | 70.207 | 7.739  |
| ATOM | 3035 | CB   | LYS | 224 | 33.052 | 68.358 | 6.875  |
| ATOM | 3036 | HB2  | LYS | 224 | 32.722 | 67.781 | 7.739  |
| ATOM | 3037 | HB3  | LYS | 224 | 32.838 | 67.801 | 5.963  |
| ATOM | 3038 | CG   | LYS | 224 | 34.548 | 68.610 | 6.976  |
| ATOM | 3039 | HG2  | LYS | 224 | 34.867 | 69.165 | 6.094  |
| ATOM | 3040 | HG3  | LYS | 224 | 34.740 | 69.206 | 7.868  |
| ATOM | 3041 | CD   | LYS | 224 | 35.324 | 67.306 | 7.061  |
| ATOM | 3042 | HD2  | LYS | 224 | 35.006 | 66.770 | 7.956  |
| ATOM | 3043 | HD3  | LYS | 224 | 35.095 | 66.708 | 6.179  |
| ATOM | 3044 | CE   | LYS | 224 | 36.821 | 67.558 | 7.127  |
| ATOM | 3045 | HE2  | LYS | 224 | 37.026 | 68.166 | 8.008  |
| ATOM | 3046 | HE3  | LYS | 224 | 35.756 | 67.332 | 7.081  |
| ATOM | 3047 | NZ   | LYS | 224 | 37.594 | 66.288 | 7.211  |
| ATOM | 3048 | HZ1  | LYS | 224 | 38.464 | 66.472 | 7.249  |
| ATOM | 3049 | HZ2  | LYS | 224 | 37.427 | 65.790 | 6.492  |
| ATOM | 3050 | HZ3  | LYS | 224 | 37.354 | 65.841 | 7.943  |
| ATOM | 3051 | C    | LYS | 224 | 32.601 | 70.492 | 5.670  |
| ATOM | 3052 | O    | LYS | 224 | 33.277 | 71.504 | 5.849  |

|      |      |      |     |     |        |        |        |
|------|------|------|-----|-----|--------|--------|--------|
| ATOM | 3053 | N    | ARG | 225 | 32.181 | 70.130 | 4.441  |
| ATOM | 3054 | H    | ARG | 225 | 31.638 | 69.420 | 4.339  |
| ATOM | 3055 | CA   | ARG | 225 | 32.604 | 70.883 | 3.292  |
| ATOM | 3056 | HA   | ARG | 225 | 33.692 | 70.941 | 3.269  |
| ATOM | 3057 | CB   | ARG | 225 | 32.123 | 70.211 | 2.004  |
| ATOM | 3058 | HB2  | ARG | 225 | 32.522 | 69.196 | 2.003  |
| ATOM | 3059 | HB3  | ARG | 225 | 31.035 | 70.173 | 2.049  |
| ATOM | 3060 | CG   | ARG | 225 | 32.553 | 70.925 | 0.733  |
| ATOM | 3061 | HG2  | ARG | 225 | 32.224 | 71.963 | 0.790  |
| ATOM | 3062 | HG3  | ARG | 225 | 33.641 | 70.892 | 0.668  |
| ATOM | 3063 | CD   | ARG | 225 | 31.952 | 70.270 | -0.499 |
| ATOM | 3064 | HD2  | ARG | 225 | 32.340 | 70.767 | -1.388 |
| ATOM | 3065 | HD3  | ARG | 225 | 32.236 | 69.218 | -0.518 |
| ATOM | 3066 | NE   | ARG | 225 | 30.493 | 70.361 | -0.511 |
| ATOM | 3067 | HE   | ARG | 225 | 30.055 | 69.654 | -0.288 |
| ATOM | 3068 | CZ   | ARG | 225 | 29.816 | 71.456 | -0.839 |
| ATOM | 3069 | NH1  | ARG | 225 | 28.490 | 71.446 | -0.821 |
| ATOM | 3070 | HH11 | ARG | 225 | 28.069 | 70.731 | -0.597 |
| ATOM | 3071 | HH12 | ARG | 225 | 28.052 | 72.154 | -1.034 |
| ATOM | 3072 | NH2  | ARG | 225 | 30.466 | 72.559 | -1.186 |
| ATOM | 3073 | HH21 | ARG | 225 | 31.326 | 72.566 | -1.197 |
| ATOM | 3074 | HH22 | ARG | 225 | 30.027 | 73.268 | -1.398 |
| ATOM | 3075 | C    | ARG | 225 | 32.098 | 72.289 | 3.363  |
| ATOM | 3076 | O    | ARG | 225 | 32.855 | 73.235 | 3.155  |
| ATOM | 3077 | N    | VAL | 226 | 30.798 | 72.461 | 3.662  |
| ATOM | 3078 | H    | VAL | 226 | 30.307 | 71.727 | 3.836  |
| ATOM | 3079 | CA   | VAL | 226 | 30.187 | 73.762 | 3.709  |
| ATOM | 3080 | HA   | VAL | 226 | 30.400 | 74.337 | 2.808  |
| ATOM | 3081 | CB   | VAL | 226 | 28.660 | 73.662 | 3.880  |
| ATOM | 3082 | HB   | VAL | 226 | 28.440 | 73.026 | 4.737  |
| ATOM | 3083 | CG1  | VAL | 226 | 28.058 | 75.041 | 4.105  |
| ATOM | 3084 | HG11 | VAL | 226 | 28.277 | 75.678 | 3.248  |
| ATOM | 3085 | HG12 | VAL | 226 | 26.978 | 74.952 | 4.224  |
| ATOM | 3086 | HG13 | VAL | 226 | 28.487 | 75.483 | 5.005  |
| ATOM | 3087 | CG2  | VAL | 226 | 28.030 | 72.993 | 2.668  |
| ATOM | 3088 | HG21 | VAL | 226 | 28.439 | 71.989 | 2.553  |
| ATOM | 3089 | HG22 | VAL | 226 | 26.951 | 72.931 | 2.807  |
| ATOM | 3090 | HG23 | VAL | 226 | 28.248 | 73.579 | 1.775  |
| ATOM | 3091 | C    | VAL | 226 | 30.781 | 74.572 | 4.817  |
| ATOM | 3092 | O    | VAL | 226 | 31.043 | 75.764 | 4.651  |
| ATOM | 3093 | N    | SER | 227 | 31.009 | 73.937 | 5.981  |
| ATOM | 3094 | H    | SER | 227 | 30.830 | 73.056 | 6.029  |
| ATOM | 3095 | CA   | SER | 227 | 31.524 | 74.627 | 7.126  |
| ATOM | 3096 | HA   | SER | 227 | 30.882 | 75.474 | 7.366  |
| ATOM | 3097 | CB   | SER | 227 | 31.574 | 73.693 | 8.337  |
| ATOM | 3098 | HB2  | SER | 227 | 31.871 | 74.271 | 9.212  |
| ATOM | 3099 | HB3  | SER | 227 | 30.580 | 73.277 | 8.498  |
| ATOM | 3100 | OG   | SER | 227 | 32.499 | 72.640 | 8.131  |
| ATOM | 3101 | HG   | SER | 227 | 32.272 | 72.200 | 7.465  |
| ATOM | 3102 | C    | SER | 227 | 32.879 | 75.158 | 6.788  |
| ATOM | 3103 | O    | SER | 227 | 33.250 | 76.241 | 7.236  |
| ATOM | 3104 | N    | VAL | 228 | 33.652 | 74.403 | 5.983  |

|      |      |      |     |     |        |        |        |
|------|------|------|-----|-----|--------|--------|--------|
| ATOM | 3105 | H    | VAL | 228 | 33.316 | 73.628 | 5.673  |
| ATOM | 3106 | CA   | VAL | 228 | 34.979 | 74.807 | 5.618  |
| ATOM | 3107 | HA   | VAL | 228 | 35.579 | 75.048 | 6.495  |
| ATOM | 3108 | CB   | VAL | 228 | 35.702 | 73.711 | 4.813  |
| ATOM | 3109 | HB   | VAL | 228 | 35.061 | 73.395 | 3.990  |
| ATOM | 3110 | CG1  | VAL | 228 | 37.017 | 74.236 | 4.259  |
| ATOM | 3111 | HG11 | VAL | 228 | 37.658 | 74.551 | 5.082  |
| ATOM | 3112 | HG12 | VAL | 228 | 37.514 | 73.448 | 3.693  |
| ATOM | 3113 | HG13 | VAL | 228 | 36.823 | 75.085 | 3.604  |
| ATOM | 3114 | CG2  | VAL | 228 | 35.937 | 72.482 | 5.679  |
| ATOM | 3115 | HG21 | VAL | 228 | 34.980 | 72.093 | 6.026  |
| ATOM | 3116 | HG22 | VAL | 228 | 36.449 | 71.717 | 5.094  |
| ATOM | 3117 | HG23 | VAL | 228 | 36.551 | 72.754 | 6.538  |
| ATOM | 3118 | C    | VAL | 228 | 34.908 | 76.080 | 4.837  |
| ATOM | 3119 | O    | VAL | 228 | 35.705 | 76.986 | 5.066  |
| ATOM | 3120 | N    | LEU | 229 | 33.958 | 76.186 | 3.884  |
| ATOM | 3121 | H    | LEU | 229 | 33.390 | 75.503 | 3.739  |
| ATOM | 3122 | CA   | LEU | 229 | 33.852 | 77.388 | 3.100  |
| ATOM | 3123 | HA   | LEU | 229 | 34.814 | 77.615 | 2.640  |
| ATOM | 3124 | CB   | LEU | 229 | 32.809 | 77.216 | 1.994  |
| ATOM | 3125 | HB2  | LEU | 229 | 31.928 | 76.848 | 2.520  |
| ATOM | 3126 | HB3  | LEU | 229 | 32.597 | 78.199 | 1.575  |
| ATOM | 3127 | CG   | LEU | 229 | 33.170 | 76.248 | 0.866  |
| ATOM | 3128 | HG   | LEU | 229 | 33.467 | 75.294 | 1.302  |
| ATOM | 3129 | CD1  | LEU | 229 | 31.983 | 76.034 | -0.060 |
| ATOM | 3130 | HD11 | LEU | 229 | 31.686 | 76.987 | -0.496 |
| ATOM | 3131 | HD12 | LEU | 229 | 32.262 | 75.342 | -0.855 |
| ATOM | 3132 | HD13 | LEU | 229 | 31.150 | 75.619 | 0.507  |
| ATOM | 3133 | CD2  | LEU | 229 | 34.368 | 76.760 | 0.081  |
| ATOM | 3134 | HD21 | LEU | 229 | 35.225 | 76.859 | 0.748  |
| ATOM | 3135 | HD22 | LEU | 229 | 34.608 | 76.057 | -0.716 |
| ATOM | 3136 | HD23 | LEU | 229 | 34.131 | 77.732 | -0.352 |
| ATOM | 3137 | C    | LEU | 229 | 33.503 | 78.520 | 4.002  |
| ATOM | 3138 | O    | LEU | 229 | 34.068 | 79.606 | 3.894  |
| ATOM | 3139 | N    | ASN | 230 | 32.562 | 78.292 | 4.932  |
| ATOM | 3140 | H    | ASN | 230 | 32.181 | 77.481 | 5.016  |
| ATOM | 3141 | CA   | ASN | 230 | 32.167 | 79.360 | 5.796  |
| ATOM | 3142 | HA   | ASN | 230 | 31.876 | 80.227 | 5.202  |
| ATOM | 3143 | CB   | ASN | 230 | 30.977 | 78.938 | 6.660  |
| ATOM | 3144 | HB2  | ASN | 230 | 31.184 | 77.956 | 7.086  |
| ATOM | 3145 | HB3  | ASN | 230 | 30.854 | 79.664 | 7.464  |
| ATOM | 3146 | CG   | ASN | 230 | 29.684 | 78.862 | 5.874  |
| ATOM | 3147 | OD1  | ASN | 230 | 29.566 | 79.446 | 4.796  |
| ATOM | 3148 | ND2  | ASN | 230 | 28.707 | 78.139 | 6.411  |
| ATOM | 3149 | HD21 | ASN | 230 | 27.918 | 78.061 | 5.985  |
| ATOM | 3150 | HD22 | ASN | 230 | 28.835 | 77.728 | 7.201  |
| ATOM | 3151 | C    | ASN | 230 | 33.355 | 79.751 | 6.615  |
| ATOM | 3152 | O    | ASN | 230 | 33.633 | 80.934 | 6.812  |
| ATOM | 3153 | N    | PHE | 231 | 34.099 | 78.742 | 7.098  |
| ATOM | 3154 | H    | PHE | 231 | 33.865 | 77.907 | 6.857  |
| ATOM | 3155 | CA   | PHE | 231 | 35.222 | 78.949 | 7.961  |
| ATOM | 3156 | HA   | PHE | 231 | 34.919 | 79.540 | 8.826  |

|      |      |      |     |     |        |        |        |
|------|------|------|-----|-----|--------|--------|--------|
| ATOM | 3157 | CB   | PHE | 231 | 35.774 | 77.609 | 8.453  |
| ATOM | 3158 | HB2  | PHE | 231 | 35.022 | 77.089 | 9.047  |
| ATOM | 3159 | HB3  | PHE | 231 | 36.060 | 76.988 | 7.604  |
| ATOM | 3160 | CG   | PHE | 231 | 36.993 | 77.738 | 9.321  |
| ATOM | 3161 | CD1  | PHE | 231 | 36.876 | 78.087 | 10.655 |
| ATOM | 3162 | HD1  | PHE | 231 | 35.886 | 78.269 | 11.074 |
| ATOM | 3163 | CE1  | PHE | 231 | 37.998 | 78.206 | 11.454 |
| ATOM | 3164 | HE1  | PHE | 231 | 37.893 | 78.482 | 12.503 |
| ATOM | 3165 | CZ   | PHE | 231 | 39.252 | 77.975 | 10.923 |
| ATOM | 3166 | HZ   | PHE | 231 | 40.140 | 78.068 | 11.549 |
| ATOM | 3167 | CE2  | PHE | 231 | 39.377 | 77.628 | 9.603  |
| ATOM | 3168 | HE2  | PHE | 231 | 40.366 | 77.445 | 9.184  |
| ATOM | 3169 | CD2  | PHE | 231 | 38.255 | 77.510 | 8.804  |
| ATOM | 3170 | HD2  | PHE | 231 | 38.360 | 77.235 | 7.755  |
| ATOM | 3171 | C    | PHE | 231 | 36.279 | 79.725 | 7.244  |
| ATOM | 3172 | O    | PHE | 231 | 36.779 | 80.720 | 7.767  |
| ATOM | 3173 | N    | HIE | 232 | 36.642 | 79.301 | 6.018  |
| ATOM | 3174 | H    | HIE | 232 | 36.228 | 78.611 | 5.615  |
| ATOM | 3175 | CA   | HIE | 232 | 37.716 | 79.977 | 5.355  |
| ATOM | 3176 | HA   | HIE | 232 | 38.597 | 79.988 | 5.997  |
| ATOM | 3177 | CB   | HIE | 232 | 38.072 | 79.265 | 4.048  |
| ATOM | 3178 | HB2  | HIE | 232 | 38.384 | 78.241 | 4.252  |
| ATOM | 3179 | HB3  | HIE | 232 | 37.211 | 79.256 | 3.380  |
| ATOM | 3180 | CG   | HIE | 232 | 39.192 | 79.911 | 3.294  |
| ATOM | 3181 | ND1  | HIE | 232 | 40.506 | 79.832 | 3.700  |
| ATOM | 3182 | CE1  | HIE | 232 | 41.276 | 80.506 | 2.827  |
| ATOM | 3183 | HE1  | HIE | 232 | 42.348 | 80.530 | 3.021  |
| ATOM | 3184 | NE2  | HIE | 232 | 40.560 | 81.036 | 1.854  |
| ATOM | 3185 | HE2  | HIE | 232 | 40.881 | 81.542 | 1.143  |
| ATOM | 3186 | CD2  | HIE | 232 | 39.302 | 80.712 | 2.083  |
| ATOM | 3187 | HD2  | HIE | 232 | 38.520 | 81.045 | 1.400  |
| ATOM | 3188 | C    | HIE | 232 | 37.375 | 81.396 | 5.082  |
| ATOM | 3189 | O    | HIE | 232 | 38.130 | 82.290 | 5.458  |
| ATOM | 3190 | N    | LEU | 233 | 36.229 | 81.670 | 4.435  |
| ATOM | 3191 | H    | LEU | 233 | 35.612 | 81.074 | 4.164  |
| ATOM | 3192 | CA   | LEU | 233 | 36.035 | 83.058 | 4.186  |
| ATOM | 3193 | HA   | LEU | 233 | 36.950 | 83.493 | 3.784  |
| ATOM | 3194 | CB   | LEU | 233 | 34.908 | 83.268 | 3.172  |
| ATOM | 3195 | HB2  | LEU | 233 | 34.074 | 82.702 | 3.586  |
| ATOM | 3196 | HB3  | LEU | 233 | 34.657 | 84.329 | 3.162  |
| ATOM | 3197 | CG   | LEU | 233 | 35.185 | 82.796 | 1.744  |
| ATOM | 3198 | HG   | LEU | 233 | 35.501 | 81.753 | 1.772  |
| ATOM | 3199 | CD1  | LEU | 233 | 33.937 | 82.924 | 0.884  |
| ATOM | 3200 | HD11 | LEU | 233 | 33.620 | 83.967 | 0.855  |
| ATOM | 3201 | HD12 | LEU | 233 | 34.156 | 82.583 | -0.128 |
| ATOM | 3202 | HD13 | LEU | 233 | 33.139 | 82.314 | 1.308  |
| ATOM | 3203 | CD2  | LEU | 233 | 36.333 | 83.583 | 1.130  |
| ATOM | 3204 | HD21 | LEU | 233 | 37.233 | 83.440 | 1.728  |
| ATOM | 3205 | HD22 | LEU | 233 | 36.513 | 83.231 | 0.114  |
| ATOM | 3206 | HD23 | LEU | 233 | 36.077 | 84.642 | 1.107  |
| ATOM | 3207 | C    | LEU | 233 | 35.732 | 83.816 | 5.423  |
| ATOM | 3208 | O    | LEU | 233 | 36.005 | 85.011 | 5.501  |

|      |      |      |     |     |        |        |        |
|------|------|------|-----|-----|--------|--------|--------|
| ATOM | 3209 | N    | LEU | 234 | 35.132 | 83.166 | 6.427  |
| ATOM | 3210 | H    | LEU | 234 | 34.873 | 82.305 | 6.390  |
| ATOM | 3211 | CA   | LEU | 234 | 34.910 | 83.926 | 7.609  |
| ATOM | 3212 | HA   | LEU | 234 | 34.363 | 84.837 | 7.365  |
| ATOM | 3213 | CB   | LEU | 234 | 34.091 | 83.119 | 8.619  |
| ATOM | 3214 | HB2  | LEU | 234 | 33.236 | 82.766 | 8.042  |
| ATOM | 3215 | HB3  | LEU | 234 | 34.692 | 82.267 | 8.935  |
| ATOM | 3216 | CG   | LEU | 234 | 33.596 | 83.879 | 9.851  |
| ATOM | 3217 | HG   | LEU | 234 | 33.251 | 84.865 | 9.542  |
| ATOM | 3218 | CD1  | LEU | 234 | 32.455 | 83.130 | 10.522 |
| ATOM | 3219 | HD11 | LEU | 234 | 32.800 | 82.144 | 10.832 |
| ATOM | 3220 | HD12 | LEU | 234 | 32.118 | 83.688 | 11.396 |
| ATOM | 3221 | HD13 | LEU | 234 | 31.628 | 83.021 | 9.820  |
| ATOM | 3222 | CD2  | LEU | 234 | 34.733 | 84.103 | 10.837 |
| ATOM | 3223 | HD21 | LEU | 234 | 35.521 | 84.684 | 10.358 |
| ATOM | 3224 | HD22 | LEU | 234 | 34.360 | 84.645 | 11.706 |
| ATOM | 3225 | HD23 | LEU | 234 | 35.134 | 83.141 | 11.155 |
| ATOM | 3226 | C    | LEU | 234 | 36.250 | 84.306 | 8.145  |
| ATOM | 3227 | O    | LEU | 234 | 36.455 | 85.445 | 8.532  |
| ATOM | 3228 | N    | HIE | 235 | 37.239 | 83.401 | 8.116  |
| ATOM | 3229 | H    | HIE | 235 | 37.110 | 82.608 | 7.711  |
| ATOM | 3230 | CA   | HIE | 235 | 38.502 | 83.696 | 8.729  |
| ATOM | 3231 | HA   | HIE | 235 | 38.350 | 83.978 | 9.771  |
| ATOM | 3232 | CB   | HIE | 235 | 39.419 | 82.472 | 8.683  |
| ATOM | 3233 | HB2  | HIE | 235 | 38.948 | 81.632 | 9.194  |
| ATOM | 3234 | HB3  | HIE | 235 | 39.626 | 82.197 | 7.649  |
| ATOM | 3235 | CG   | HIE | 235 | 40.745 | 82.686 | 9.343  |
| ATOM | 3236 | ND1  | HIE | 235 | 40.889 | 82.788 | 10.710 |
| ATOM | 3237 | CE1  | HIE | 235 | 42.189 | 82.975 | 11.000 |
| ATOM | 3238 | HE1  | HIE | 235 | 42.457 | 83.074 | 12.052 |
| ATOM | 3239 | NE2  | HIE | 235 | 42.933 | 83.007 | 9.911  |
| ATOM | 3240 | HE2  | HIE | 235 | 43.854 | 83.125 | 9.874  |
| ATOM | 3241 | CD2  | HIE | 235 | 42.120 | 82.838 | 8.887  |
| ATOM | 3242 | HD2  | HIE | 235 | 42.517 | 82.829 | 7.872  |
| ATOM | 3243 | C    | HIE | 235 | 39.147 | 84.865 | 8.045  |
| ATOM | 3244 | O    | HIE | 235 | 39.712 | 85.743 | 8.698  |
| ATOM | 3245 | N    | GLN | 236 | 39.070 | 84.908 | 6.704  |
| ATOM | 3246 | H    | GLN | 236 | 38.604 | 84.262 | 6.285  |
| ATOM | 3247 | CA   | GLN | 236 | 39.705 | 85.944 | 5.942  |
| ATOM | 3248 | HA   | GLN | 236 | 40.754 | 86.022 | 6.227  |
| ATOM | 3249 | CB   | GLN | 236 | 39.627 | 85.633 | 4.446  |
| ATOM | 3250 | HB2  | GLN | 236 | 38.576 | 85.469 | 4.207  |
| ATOM | 3251 | HB3  | GLN | 236 | 39.986 | 86.515 | 3.916  |
| ATOM | 3252 | CG   | GLN | 236 | 40.438 | 84.421 | 4.020  |
| ATOM | 3253 | HG2  | GLN | 236 | 40.086 | 83.551 | 4.575  |
| ATOM | 3254 | HG3  | GLN | 236 | 40.287 | 84.256 | 2.953  |
| ATOM | 3255 | CD   | GLN | 236 | 41.922 | 84.593 | 4.279  |
| ATOM | 3256 | OE1  | GLN | 236 | 42.505 | 85.623 | 3.942  |
| ATOM | 3257 | NE2  | GLN | 236 | 42.538 | 83.582 | 4.880  |
| ATOM | 3258 | HE21 | GLN | 236 | 43.419 | 83.633 | 5.057  |
| ATOM | 3259 | HE22 | GLN | 236 | 42.075 | 82.846 | 5.111  |
| ATOM | 3260 | C    | GLN | 236 | 39.076 | 87.269 | 6.233  |

|      |      |      |     |     |        |        |        |
|------|------|------|-----|-----|--------|--------|--------|
| ATOM | 3261 | O    | GLN | 236 | 39.761 | 88.291 | 6.253  |
| ATOM | 3262 | N    | LEU | 237 | 37.752 | 87.283 | 6.472  |
| ATOM | 3263 | H    | LEU | 237 | 37.331 | 86.490 | 6.535  |
| ATOM | 3264 | CA   | LEU | 237 | 37.011 | 88.504 | 6.626  |
| ATOM | 3265 | HA   | LEU | 237 | 37.186 | 89.152 | 5.767  |
| ATOM | 3266 | CB   | LEU | 237 | 35.512 | 88.213 | 6.722  |
| ATOM | 3267 | HB2  | LEU | 237 | 35.463 | 87.253 | 7.236  |
| ATOM | 3268 | HB3  | LEU | 237 | 35.059 | 88.983 | 7.347  |
| ATOM | 3269 | CG   | LEU | 237 | 34.753 | 88.120 | 5.396  |
| ATOM | 3270 | HG   | LEU | 237 | 33.717 | 87.852 | 5.601  |
| ATOM | 3271 | CD1  | LEU | 237 | 34.796 | 89.449 | 4.658  |
| ATOM | 3272 | HD11 | LEU | 237 | 35.832 | 89.718 | 4.452  |
| ATOM | 3273 | HD12 | LEU | 237 | 34.251 | 89.361 | 3.718  |
| ATOM | 3274 | HD13 | LEU | 237 | 34.336 | 90.222 | 5.274  |
| ATOM | 3275 | CD2  | LEU | 237 | 35.327 | 87.012 | 4.525  |
| ATOM | 3276 | HD21 | LEU | 237 | 35.243 | 86.059 | 5.047  |
| ATOM | 3277 | HD22 | LEU | 237 | 34.773 | 86.963 | 3.587  |
| ATOM | 3278 | HD23 | LEU | 237 | 36.376 | 87.220 | 4.316  |
| ATOM | 3279 | C    | LEU | 237 | 37.380 | 89.353 | 7.809  |
| ATOM | 3280 | O    | LEU | 237 | 37.229 | 90.565 | 7.678  |
| ATOM | 3281 | N    | PRO | 238 | 37.829 | 88.922 | 8.957  |
| ATOM | 3282 | CD   | PRO | 238 | 37.756 | 87.543 | 9.593  |
| ATOM | 3283 | HD2  | PRO | 238 | 38.607 | 86.932 | 9.291  |
| ATOM | 3284 | HD3  | PRO | 238 | 36.830 | 87.038 | 9.316  |
| ATOM | 3285 | CG   | PRO | 238 | 37.796 | 87.908 | 11.050 |
| ATOM | 3286 | HG2  | PRO | 238 | 38.251 | 87.095 | 11.616 |
| ATOM | 3287 | HG3  | PRO | 238 | 36.781 | 88.077 | 11.410 |
| ATOM | 3288 | CB   | PRO | 238 | 38.608 | 89.157 | 11.141 |
| ATOM | 3289 | HB2  | PRO | 238 | 39.652 | 88.845 | 11.115 |
| ATOM | 3290 | HB3  | PRO | 238 | 38.439 | 89.786 | 12.015 |
| ATOM | 3291 | CA   | PRO | 238 | 38.265 | 89.931 | 9.867  |
| ATOM | 3292 | HA   | PRO | 238 | 37.468 | 90.657 | 10.030 |
| ATOM | 3293 | C    | PRO | 238 | 39.449 | 90.618 | 9.275  |
| ATOM | 3294 | O    | PRO | 238 | 39.820 | 91.676 | 9.777  |
| ATOM | 3295 | N    | GLY | 239 | 40.069 | 90.019 | 8.237  |
| ATOM | 3296 | H    | GLY | 239 | 39.812 | 89.197 | 7.974  |
| ATOM | 3297 | CA   | GLY | 239 | 41.131 | 90.687 | 7.556  |
| ATOM | 3298 | HA2  | GLY | 239 | 41.925 | 90.954 | 8.253  |
| ATOM | 3299 | HA3  | GLY | 239 | 41.539 | 90.054 | 6.768  |
| ATOM | 3300 | C    | GLY | 239 | 40.576 | 91.948 | 6.936  |
| ATOM | 3301 | O    | GLY | 239 | 41.196 | 93.000 | 7.090  |
| ATOM | 3302 | N    | CYS | 240 | 39.409 | 91.898 | 6.224  |
| ATOM | 3303 | H    | CYS | 240 | 38.968 | 91.123 | 6.102  |
| ATOM | 3304 | CA   | CYS | 240 | 38.883 | 93.131 | 5.659  |
| ATOM | 3305 | HA   | CYS | 240 | 38.598 | 93.812 | 6.461  |
| ATOM | 3306 | CB   | CYS | 240 | 39.939 | 93.815 | 4.789  |
| ATOM | 3307 | HB2  | CYS | 240 | 40.842 | 94.004 | 5.369  |
| ATOM | 3308 | HB3  | CYS | 240 | 40.184 | 93.190 | 3.930  |
| ATOM | 3309 | SG   | CYS | 240 | 39.431 | 95.415 | 4.116  |
| ATOM | 3310 | HG   | CYS | 240 | 40.563 | 95.656 | 3.462  |
| ATOM | 3311 | C    | CYS | 240 | 37.611 | 92.955 | 4.820  |
| ATOM | 3312 | O    | CYS | 240 | 37.501 | 92.018 | 4.032  |

|      |      |     |     |     |        |        |        |
|------|------|-----|-----|-----|--------|--------|--------|
| ATOM | 3313 | N   | ALA | 241 | 36.629 | 93.903 | 4.944  |
| ATOM | 3314 | H   | ALA | 241 | 36.850 | 94.559 | 5.519  |
| ATOM | 3315 | CA  | ALA | 241 | 35.346 | 93.933 | 4.268  |
| ATOM | 3316 | HA  | ALA | 241 | 35.428 | 93.733 | 3.200  |
| ATOM | 3317 | CB  | ALA | 241 | 34.399 | 92.914 | 4.882  |
| ATOM | 3318 | HB1 | ALA | 241 | 34.300 | 93.107 | 5.950  |
| ATOM | 3319 | HB2 | ALA | 241 | 33.421 | 92.993 | 4.407  |
| ATOM | 3320 | HB3 | ALA | 241 | 34.796 | 91.910 | 4.730  |
| ATOM | 3321 | C   | ALA | 241 | 34.847 | 95.342 | 4.394  |
| ATOM | 3322 | O   | ALA | 241 | 35.417 | 96.146 | 5.131  |
| ATOM | 3323 | N   | ALA | 242 | 33.791 | 95.695 | 3.634  |
| ATOM | 3324 | H   | ALA | 242 | 33.436 | 95.085 | 3.075  |
| ATOM | 3325 | CA  | ALA | 242 | 33.232 | 97.016 | 3.704  |
| ATOM | 3326 | HA  | ALA | 242 | 34.017 | 97.761 | 3.574  |
| ATOM | 3327 | CB  | ALA | 242 | 32.192 | 97.210 | 2.611  |
| ATOM | 3328 | HB1 | ALA | 242 | 31.395 | 96.477 | 2.733  |
| ATOM | 3329 | HB2 | ALA | 242 | 31.775 | 98.215 | 2.680  |
| ATOM | 3330 | HB3 | ALA | 242 | 32.660 | 97.078 | 1.636  |
| ATOM | 3331 | C   | ALA | 242 | 32.631 | 97.238 | 5.062  |
| ATOM | 3332 | O   | ALA | 242 | 32.794 | 98.302 | 5.656  |
| ATOM | 3333 | N   | ALA | 243 | 31.935 | 96.218 | 5.599  |
| ATOM | 3334 | H   | ALA | 243 | 31.921 | 95.438 | 5.150  |
| ATOM | 3335 | CA  | ALA | 243 | 31.229 | 96.342 | 6.846  |
| ATOM | 3336 | HA  | ALA | 243 | 30.636 | 97.256 | 6.829  |
| ATOM | 3337 | CB  | ALA | 243 | 30.294 | 95.159 | 7.046  |
| ATOM | 3338 | HB1 | ALA | 243 | 30.875 | 94.237 | 7.074  |
| ATOM | 3339 | HB2 | ALA | 243 | 29.754 | 95.277 | 7.986  |
| ATOM | 3340 | HB3 | ALA | 243 | 29.582 | 95.115 | 6.222  |
| ATOM | 3341 | C   | ALA | 243 | 32.182 | 96.446 | 7.991  |
| ATOM | 3342 | O   | ALA | 243 | 33.345 | 96.058 | 7.899  |
| ATOM | 3343 | N   | ALA | 244 | 31.685 | 97.003 | 9.113  |
| ATOM | 3344 | H   | ALA | 244 | 30.831 | 97.287 | 9.097  |
| ATOM | 3345 | CA  | ALA | 244 | 32.467 | 97.151 | 10.304 |
| ATOM | 3346 | HA  | ALA | 244 | 33.441 | 97.594 | 10.097 |
| ATOM | 3347 | CB  | ALA | 244 | 31.738 | 98.027 | 11.312 |
| ATOM | 3348 | HB1 | ALA | 244 | 30.764 | 97.591 | 11.536 |
| ATOM | 3349 | HB2 | ALA | 244 | 32.325 | 98.093 | 12.228 |
| ATOM | 3350 | HB3 | ALA | 244 | 31.602 | 99.025 | 10.895 |
| ATOM | 3351 | C   | ALA | 244 | 32.728 | 95.779 | 10.832 |
| ATOM | 3352 | O   | ALA | 244 | 31.967 | 94.850 | 10.584 |
| ATOM | 3353 | N   | ALA | 245 | 33.861 | 95.615 | 11.541 |
| ATOM | 3354 | H   | ALA | 245 | 34.389 | 96.333 | 11.664 |
| ATOM | 3355 | CA  | ALA | 245 | 34.237 | 94.345 | 12.093 |
| ATOM | 3356 | HA  | ALA | 245 | 34.219 | 93.580 | 11.316 |
| ATOM | 3357 | CB  | ALA | 245 | 35.641 | 94.414 | 12.675 |
| ATOM | 3358 | HB1 | ALA | 245 | 35.673 | 95.169 | 13.460 |
| ATOM | 3359 | HB2 | ALA | 245 | 35.910 | 93.444 | 13.093 |
| ATOM | 3360 | HB3 | ALA | 245 | 36.348 | 94.678 | 11.889 |
| ATOM | 3361 | C   | ALA | 245 | 33.245 | 93.938 | 13.136 |
| ATOM | 3362 | O   | ALA | 245 | 32.940 | 92.756 | 13.287 |
| ATOM | 3363 | N   | ALA | 246 | 32.741 | 94.911 | 13.915 |
| ATOM | 3364 | H   | ALA | 246 | 32.971 | 95.767 | 13.760 |



|      |      |     |     |     |        |        |        |
|------|------|-----|-----|-----|--------|--------|--------|
| ATOM | 3365 | CA  | ALA | 246 | 31.843 | 94.592 | 14.986 |
| ATOM | 3366 | HA  | ALA | 246 | 32.319 | 93.856 | 15.634 |
| ATOM | 3367 | CB  | ALA | 246 | 31.534 | 95.835 | 15.807 |
| ATOM | 3368 | HB1 | ALA | 246 | 31.049 | 96.578 | 15.174 |
| ATOM | 3369 | HB2 | ALA | 246 | 30.870 | 95.571 | 16.631 |
| ATOM | 3370 | HB3 | ALA | 246 | 32.461 | 96.247 | 16.206 |
| ATOM | 3371 | C   | ALA | 246 | 30.568 | 93.987 | 14.470 |
| ATOM | 3372 | O   | ALA | 246 | 30.118 | 92.965 | 14.988 |
| ATOM | 3373 | N   | PHE | 247 | 29.956 | 94.567 | 13.416 |
| ATOM | 3374 | H   | PHE | 247 | 30.316 | 95.260 | 12.968 |
| ATOM | 3375 | CA  | PHE | 247 | 28.680 | 94.036 | 13.016 |
| ATOM | 3376 | HA  | PHE | 247 | 28.540 | 93.046 | 13.449 |
| ATOM | 3377 | CB  | PHE | 247 | 27.547 | 94.945 | 13.497 |
| ATOM | 3378 | HB2 | PHE | 247 | 27.671 | 95.947 | 13.087 |
| ATOM | 3379 | HB3 | PHE | 247 | 26.585 | 94.541 | 13.183 |
| ATOM | 3380 | CG  | PHE | 247 | 27.483 | 95.096 | 14.990 |
| ATOM | 3381 | CD1 | PHE | 247 | 28.133 | 96.141 | 15.623 |
| ATOM | 3382 | HD1 | PHE | 247 | 28.696 | 96.859 | 15.026 |
| ATOM | 3383 | CE1 | PHE | 247 | 28.074 | 96.280 | 16.996 |
| ATOM | 3384 | HE1 | PHE | 247 | 28.590 | 97.108 | 17.483 |
| ATOM | 3385 | CZ  | PHE | 247 | 27.360 | 95.369 | 17.753 |
| ATOM | 3386 | HZ  | PHE | 247 | 27.311 | 95.474 | 18.837 |
| ATOM | 3387 | CE2 | PHE | 247 | 26.713 | 94.332 | 17.135 |
| ATOM | 3388 | HE2 | PHE | 247 | 26.150 | 93.614 | 17.732 |
| ATOM | 3389 | CD2 | PHE | 247 | 26.772 | 94.193 | 15.761 |
| ATOM | 3390 | HD2 | PHE | 247 | 26.255 | 93.366 | 15.274 |
| ATOM | 3391 | C   | PHE | 247 | 28.619 | 93.871 | 11.532 |
| ATOM | 3392 | O   | PHE | 247 | 29.504 | 94.301 | 10.802 |
| ATOM | 3393 | N   | PRO | 248 | 27.591 | 93.213 | 11.074 |
| ATOM | 3394 | CD  | PRO | 248 | 26.403 | 92.588 | 11.847 |
| ATOM | 3395 | HD2 | PRO | 248 | 25.920 | 93.345 | 12.465 |
| ATOM | 3396 | HD3 | PRO | 248 | 26.756 | 91.774 | 12.480 |
| ATOM | 3397 | CG  | PRO | 248 | 25.520 | 92.104 | 10.731 |
| ATOM | 3398 | HG2 | PRO | 248 | 24.777 | 92.867 | 10.499 |
| ATOM | 3399 | HG3 | PRO | 248 | 25.016 | 91.188 | 11.038 |
| ATOM | 3400 | CB  | PRO | 248 | 26.423 | 91.852 | 9.570  |
| ATOM | 3401 | HB2 | PRO | 248 | 25.896 | 91.924 | 8.619  |
| ATOM | 3402 | HB3 | PRO | 248 | 26.896 | 90.873 | 9.650  |
| ATOM | 3403 | CA  | PRO | 248 | 27.482 | 92.952 | 9.662  |
| ATOM | 3404 | HA  | PRO | 248 | 28.461 | 92.600 | 9.336  |
| ATOM | 3405 | C   | PRO | 248 | 27.068 | 94.121 | 8.825  |
| ATOM | 3406 | O   | PRO | 248 | 26.487 | 95.072 | 9.346  |
| ATOM | 3407 | N   | GLY | 249 | 27.382 | 94.051 | 7.515  |
| ATOM | 3408 | H   | GLY | 249 | 27.850 | 93.326 | 7.259  |
| ATOM | 3409 | CA  | GLY | 249 | 27.015 | 95.045 | 6.549  |
| ATOM | 3410 | HA2 | GLY | 249 | 25.934 | 95.122 | 6.434  |
| ATOM | 3411 | HA3 | GLY | 249 | 27.424 | 96.024 | 6.797  |
| ATOM | 3412 | C   | GLY | 249 | 27.609 | 94.582 | 5.259  |
| ATOM | 3413 | O   | GLY | 249 | 28.695 | 94.005 | 5.249  |
| ATOM | 3414 | N   | ALA | 250 | 26.927 | 94.807 | 4.119  |
| ATOM | 3415 | H   | ALA | 250 | 26.131 | 95.224 | 4.060  |
| ATOM | 3416 | CA  | ALA | 250 | 27.570 | 94.321 | 2.936  |

|      |      |      |     |     |        |         |        |
|------|------|------|-----|-----|--------|---------|--------|
| ATOM | 3417 | HA   | ALA | 250 | 28.647 | 94.471  | 3.017  |
| ATOM | 3418 | CB   | ALA | 250 | 27.298 | 92.835  | 2.757  |
| ATOM | 3419 | HB1  | ALA | 250 | 26.224 | 92.670  | 2.665  |
| ATOM | 3420 | HB2  | ALA | 250 | 27.798 | 92.479  | 1.856  |
| ATOM | 3421 | HB3  | ALA | 250 | 27.676 | 92.289  | 3.621  |
| ATOM | 3422 | C    | ALA | 250 | 27.104 | 95.088  | 1.744  |
| ATOM | 3423 | O    | ALA | 250 | 25.972 | 95.566  | 1.688  |
| ATOM | 3424 | N    | GLN | 251 | 28.013 | 95.237  | 0.761  |
| ATOM | 3425 | H    | GLN | 251 | 28.843 | 94.919  | 0.906  |
| ATOM | 3426 | CA   | GLN | 251 | 27.698 | 95.874  | -0.481 |
| ATOM | 3427 | HA   | GLN | 251 | 26.753 | 95.488  | -0.864 |
| ATOM | 3428 | CB   | GLN | 251 | 27.567 | 97.386  | -0.290 |
| ATOM | 3429 | HB2  | GLN | 251 | 26.854 | 97.547  | 0.519  |
| ATOM | 3430 | HB3  | GLN | 251 | 28.547 | 97.757  | 0.011  |
| ATOM | 3431 | CG   | GLN | 251 | 27.102 | 98.131  | -1.530 |
| ATOM | 3432 | HG2  | GLN | 251 | 27.848 | 98.005  | -2.315 |
| ATOM | 3433 | HG3  | GLN | 251 | 26.154 | 97.705  | -1.859 |
| ATOM | 3434 | CD   | GLN | 251 | 26.907 | 99.614  | -1.281 |
| ATOM | 3435 | OE1  | GLN | 251 | 27.472 | 100.174 | -0.342 |
| ATOM | 3436 | NE2  | GLN | 251 | 26.105 | 100.254 | -2.124 |
| ATOM | 3437 | HE21 | GLN | 251 | 25.956 | 101.136 | -2.021 |
| ATOM | 3438 | HE22 | GLN | 251 | 25.712 | 99.806  | -2.798 |
| ATOM | 3439 | C    | GLN | 251 | 28.795 | 95.503  | -1.423 |
| ATOM | 3440 | O    | GLN | 251 | 29.947 | 95.359  | -1.016 |
| ATOM | 3441 | N    | HIE | 252 | 28.472 | 95.320  | -2.716 |
| ATOM | 3442 | H    | HIE | 252 | 27.627 | 95.414  | -3.012 |
| ATOM | 3443 | CA   | HIE | 252 | 29.516 | 94.966  | -3.630 |
| ATOM | 3444 | HA   | HIE | 252 | 30.487 | 95.111  | -3.156 |
| ATOM | 3445 | CB   | HIE | 252 | 29.390 | 93.499  | -4.046 |
| ATOM | 3446 | HB2  | HIE | 252 | 28.417 | 93.322  | -4.504 |
| ATOM | 3447 | HB3  | HIE | 252 | 30.177 | 93.242  | -4.755 |
| ATOM | 3448 | CG   | HIE | 252 | 29.509 | 92.536  | -2.906 |
| ATOM | 3449 | ND1  | HIE | 252 | 30.723 | 92.082  | -2.438 |
| ATOM | 3450 | CE1  | HIE | 252 | 30.510 | 91.234  | -1.416 |
| ATOM | 3451 | HE1  | HIE | 252 | 31.386 | 90.792  | -0.942 |
| ATOM | 3452 | NE2  | HIE | 252 | 29.223 | 91.088  | -1.164 |
| ATOM | 3453 | HE2  | HIE | 252 | 28.846 | 90.552  | -0.504 |
| ATOM | 3454 | CD2  | HIE | 252 | 28.575 | 91.846  | -2.028 |
| ATOM | 3455 | HD2  | HIE | 252 | 27.486 | 91.886  | -2.008 |
| ATOM | 3456 | C    | HIE | 252 | 29.434 | 95.880  | -4.805 |
| ATOM | 3457 | O    | HIE | 252 | 28.354 | 96.149  | -5.326 |
| ATOM | 3458 | N    | ALA | 253 | 30.594 | 96.405  | -5.236 |
| ATOM | 3459 | H    | ALA | 253 | 31.359 | 96.237  | -4.793 |
| ATOM | 3460 | CA   | ALA | 253 | 30.610 | 97.232  | -6.402 |
| ATOM | 3461 | HA   | ALA | 253 | 29.690 | 97.159  | -6.982 |
| ATOM | 3462 | CB   | ALA | 253 | 30.828 | 98.687  | -6.017 |
| ATOM | 3463 | HB1  | ALA | 253 | 31.751 | 98.777  | -5.444 |
| ATOM | 3464 | HB2  | ALA | 253 | 30.900 | 99.295  | -6.919 |
| ATOM | 3465 | HB3  | ALA | 253 | 29.990 | 99.033  | -5.412 |
| ATOM | 3466 | C    | ALA | 253 | 31.695 | 96.696  | -7.272 |
| ATOM | 3467 | O    | ALA | 253 | 32.780 | 96.360  | -6.802 |
| ATOM | 3468 | N    | PRO | 254 | 31.410 | 96.583  | -8.534 |

|      |      |     |     |     |        |         |         |
|------|------|-----|-----|-----|--------|---------|---------|
| ATOM | 3469 | CD  | PRO | 254 | 30.053 | 96.786  | -9.259  |
| ATOM | 3470 | HD2 | PRO | 254 | 29.680 | 97.795  | -9.082  |
| ATOM | 3471 | HD3 | PRO | 254 | 29.323 | 96.060  | -8.900  |
| ATOM | 3472 | CG  | PRO | 254 | 30.432 | 96.555  | -10.695 |
| ATOM | 3473 | HG2 | PRO | 254 | 30.660 | 97.510  | -11.168 |
| ATOM | 3474 | HG3 | PRO | 254 | 29.602 | 96.080  | -11.218 |
| ATOM | 3475 | CB  | PRO | 254 | 31.626 | 95.661  | -10.669 |
| ATOM | 3476 | HB2 | PRO | 254 | 32.199 | 95.866  | -11.573 |
| ATOM | 3477 | HB3 | PRO | 254 | 31.418 | 94.593  | -10.606 |
| ATOM | 3478 | CA  | PRO | 254 | 32.416 | 96.112  | -9.439  |
| ATOM | 3479 | HA  | PRO | 254 | 32.964 | 95.289  | -8.980  |
| ATOM | 3480 | C   | PRO | 254 | 33.359 | 97.223  | -9.750  |
| ATOM | 3481 | O   | PRO | 254 | 32.985 | 98.385  | -9.598  |
| ATOM | 3482 | N   | GLY | 255 | 34.589 | 96.886  | -10.172 |
| ATOM | 3483 | H   | GLY | 255 | 34.805 | 96.015  | -10.246 |
| ATOM | 3484 | CA  | GLY | 255 | 35.550 | 97.891  | -10.502 |
| ATOM | 3485 | HA2 | GLY | 255 | 35.306 | 98.845  | -10.035 |
| ATOM | 3486 | HA3 | GLY | 255 | 36.556 | 97.591  | -10.210 |
| ATOM | 3487 | C   | GLY | 255 | 35.502 | 98.050  | -11.982 |
| ATOM | 3488 | O   | GLY | 255 | 34.444 | 97.985  | -12.607 |
| ATOM | 3489 | N   | PRO | 256 | 36.651 | 98.285  | -12.540 |
| ATOM | 3490 | CD  | PRO | 256 | 37.967 | 98.556  | -11.819 |
| ATOM | 3491 | HD2 | PRO | 256 | 38.176 | 97.760  | -11.104 |
| ATOM | 3492 | HD3 | PRO | 256 | 37.921 | 99.511  | -11.296 |
| ATOM | 3493 | CG  | PRO | 256 | 38.942 | 98.576  | -12.962 |
| ATOM | 3494 | HG2 | PRO | 256 | 39.359 | 97.579  | -13.101 |
| ATOM | 3495 | HG3 | PRO | 256 | 39.746 | 99.278  | -12.741 |
| ATOM | 3496 | CB  | PRO | 256 | 38.167 | 99.014  | -14.160 |
| ATOM | 3497 | HB2 | PRO | 256 | 38.664 | 98.539  | -15.005 |
| ATOM | 3498 | HB3 | PRO | 256 | 38.078 | 100.084 | -14.346 |
| ATOM | 3499 | CA  | PRO | 256 | 36.779 | 98.402  | -13.962 |
| ATOM | 3500 | HA  | PRO | 256 | 35.989 | 99.032  | -14.372 |
| ATOM | 3501 | C   | PRO | 256 | 36.656 | 97.026  | -14.520 |
| ATOM | 3502 | O   | PRO | 256 | 36.813 | 96.068  | -13.765 |
| ATOM | 3503 | N   | GLY | 257 | 36.370 | 96.895  | -15.828 |
| ATOM | 3504 | H   | GLY | 257 | 36.287 | 97.609  | -16.370 |
| ATOM | 3505 | CA  | GLY | 257 | 36.197 | 95.575  | -16.352 |
| ATOM | 3506 | HA2 | GLY | 257 | 36.035 | 95.585  | -17.430 |
| ATOM | 3507 | HA3 | GLY | 257 | 37.046 | 94.932  | -16.119 |
| ATOM | 3508 | C   | GLY | 257 | 34.980 | 95.033  | -15.683 |
| ATOM | 3509 | O   | GLY | 257 | 33.861 | 95.452  | -15.975 |
| ATOM | 3510 | N   | GLY | 258 | 35.172 | 94.073  | -14.762 |
| ATOM | 3511 | H   | GLY | 258 | 36.003 | 93.772  | -14.591 |
| ATOM | 3512 | CA  | GLY | 258 | 34.054 | 93.529  | -14.053 |
| ATOM | 3513 | HA2 | GLY | 258 | 34.301 | 93.385  | -13.001 |
| ATOM | 3514 | HA3 | GLY | 258 | 33.191 | 94.189  | -14.136 |
| ATOM | 3515 | C   | GLY | 258 | 33.715 | 92.209  | -14.656 |
| ATOM | 3516 | O   | GLY | 258 | 32.985 | 91.418  | -14.061 |
| ATOM | 3517 | N   | ALA | 259 | 34.233 | 91.931  | -15.865 |
| ATOM | 3518 | H   | ALA | 259 | 34.738 | 92.526  | -16.313 |
| ATOM | 3519 | CA  | ALA | 259 | 33.962 | 90.649  | -16.438 |
| ATOM | 3520 | HA  | ALA | 259 | 33.273 | 90.059  | -15.834 |

|      |      |     |     |     |        |        |         |
|------|------|-----|-----|-----|--------|--------|---------|
| ATOM | 3521 | CB  | ALA | 259 | 33.375 | 90.805 | -17.832 |
| ATOM | 3522 | HB1 | ALA | 259 | 34.058 | 91.386 | -18.452 |
| ATOM | 3523 | HB2 | ALA | 259 | 33.229 | 89.821 | -18.278 |
| ATOM | 3524 | HB3 | ALA | 259 | 32.416 | 91.320 | -17.768 |
| ATOM | 3525 | C   | ALA | 259 | 35.255 | 89.911 | -16.438 |
| ATOM | 3526 | O   | ALA | 259 | 36.269 | 90.419 | -16.913 |
| ATOM | 3527 | N   | ALA | 260 | 35.258 | 88.685 | -15.884 |
| ATOM | 3528 | H   | ALA | 260 | 34.519 | 88.320 | -15.522 |
| ATOM | 3529 | CA  | ALA | 260 | 36.488 | 87.958 | -15.882 |
| ATOM | 3530 | HA  | ALA | 260 | 37.337 | 88.576 | -15.591 |
| ATOM | 3531 | CB  | ALA | 260 | 36.402 | 86.772 | -14.933 |
| ATOM | 3532 | HB1 | ALA | 260 | 35.562 | 86.139 | -15.218 |
| ATOM | 3533 | HB2 | ALA | 260 | 37.326 | 86.195 | -14.986 |
| ATOM | 3534 | HB3 | ALA | 260 | 36.257 | 87.131 | -13.914 |
| ATOM | 3535 | C   | ALA | 260 | 36.733 | 87.548 | -17.292 |
| ATOM | 3536 | O   | ALA | 260 | 35.865 | 86.966 | -17.939 |
| ATOM | 3537 | N   | HIE | 261 | 37.930 | 87.862 | -17.814 |
| ATOM | 3538 | H   | HIE | 261 | 38.543 | 88.308 | -17.329 |
| ATOM | 3539 | CA  | HIE | 261 | 38.225 | 87.477 | -19.160 |
| ATOM | 3540 | HA  | HIE | 261 | 37.418 | 87.795 | -19.820 |
| ATOM | 3541 | CB  | HIE | 261 | 39.527 | 88.128 | -19.630 |
| ATOM | 3542 | HB2 | HIE | 261 | 40.313 | 87.966 | -18.893 |
| ATOM | 3543 | HB3 | HIE | 261 | 39.834 | 87.705 | -20.586 |
| ATOM | 3544 | CG  | HIE | 261 | 39.425 | 89.608 | -19.830 |
| ATOM | 3545 | ND1 | HIE | 261 | 38.601 | 90.176 | -20.778 |
| ATOM | 3546 | CE1 | HIE | 261 | 38.724 | 91.514 | -20.719 |
| ATOM | 3547 | HE1 | HIE | 261 | 38.126 | 92.102 | -21.416 |
| ATOM | 3548 | NE2 | HIE | 261 | 39.582 | 91.885 | -19.788 |
| ATOM | 3549 | HE2 | HIE | 261 | 39.822 | 92.757 | -19.573 |
| ATOM | 3550 | CD2 | HIE | 261 | 40.034 | 90.782 | -19.222 |
| ATOM | 3551 | HD2 | HIE | 261 | 40.764 | 90.843 | -18.415 |
| ATOM | 3552 | C   | HIE | 261 | 38.304 | 85.983 | -19.210 |
| ATOM | 3553 | O   | HIE | 261 | 37.757 | 85.365 | -20.122 |
| ATOM | 3554 | N   | PRO | 262 | 38.958 | 85.369 | -18.259 |
| ATOM | 3555 | CD  | PRO | 262 | 39.832 | 85.965 | -17.124 |
| ATOM | 3556 | HD2 | PRO | 262 | 39.233 | 86.625 | -16.496 |
| ATOM | 3557 | HD3 | PRO | 262 | 40.666 | 86.525 | -17.547 |
| ATOM | 3558 | CG  | PRO | 262 | 40.282 | 84.729 | -16.397 |
| ATOM | 3559 | HG2 | PRO | 262 | 39.603 | 84.528 | -15.569 |
| ATOM | 3560 | HG3 | PRO | 262 | 41.290 | 84.882 | -16.011 |
| ATOM | 3561 | CB  | PRO | 262 | 40.258 | 83.626 | -17.402 |
| ATOM | 3562 | HB2 | PRO | 262 | 40.099 | 82.688 | -16.871 |
| ATOM | 3563 | HB3 | PRO | 262 | 41.154 | 83.547 | -18.017 |
| ATOM | 3564 | CA  | PRO | 262 | 39.046 | 83.937 | -18.283 |
| ATOM | 3565 | HA  | PRO | 262 | 39.194 | 83.608 | -19.312 |
| ATOM | 3566 | C   | PRO | 262 | 37.800 | 83.329 | -17.743 |
| ATOM | 3567 | O   | PRO | 262 | 37.081 | 84.000 | -17.005 |
| ATOM | 3568 | N   | ALA | 263 | 37.517 | 82.066 | -18.108 |
| ATOM | 3569 | H   | ALA | 263 | 38.039 | 81.629 | -18.697 |
| ATOM | 3570 | CA  | ALA | 263 | 36.372 | 81.417 | -17.550 |
| ATOM | 3571 | HA  | ALA | 263 | 35.486 | 82.052 | -17.518 |
| ATOM | 3572 | CB  | ALA | 263 | 36.040 | 80.158 | -18.337 |

|      |      |      |     |     |        |        |         |
|------|------|------|-----|-----|--------|--------|---------|
| ATOM | 3573 | HB1  | ALA | 263 | 36.914 | 79.508 | -18.370 |
| ATOM | 3574 | HB2  | ALA | 263 | 35.216 | 79.633 | -17.853 |
| ATOM | 3575 | HB3  | ALA | 263 | 35.751 | 80.429 | -19.352 |
| ATOM | 3576 | C    | ALA | 263 | 36.735 | 81.147 | -16.130 |
| ATOM | 3577 | O    | ALA | 263 | 37.905 | 80.943 | -15.816 |
| ATOM | 3578 | N    | GLN | 264 | 35.743 | 81.174 | -15.221 |
| ATOM | 3579 | H    | GLN | 264 | 34.891 | 81.337 | -15.459 |
| ATOM | 3580 | CA   | GLN | 264 | 36.069 | 80.935 | -13.847 |
| ATOM | 3581 | HA   | GLN | 264 | 36.890 | 80.221 | -13.781 |
| ATOM | 3582 | CB   | GLN | 264 | 36.496 | 82.236 | -13.163 |
| ATOM | 3583 | HB2  | GLN | 264 | 36.806 | 81.980 | -12.150 |
| ATOM | 3584 | HB3  | GLN | 264 | 37.351 | 82.624 | -13.716 |
| ATOM | 3585 | CG   | GLN | 264 | 35.406 | 83.294 | -13.107 |
| ATOM | 3586 | HG2  | GLN | 264 | 35.066 | 83.501 | -14.122 |
| ATOM | 3587 | HG3  | GLN | 264 | 34.574 | 82.910 | -12.517 |
| ATOM | 3588 | CD   | GLN | 264 | 35.884 | 84.590 | -12.483 |
| ATOM | 3589 | OE1  | GLN | 264 | 37.061 | 84.937 | -12.575 |
| ATOM | 3590 | NE2  | GLN | 264 | 34.969 | 85.310 | -11.844 |
| ATOM | 3591 | HE21 | GLN | 264 | 35.200 | 86.088 | -11.455 |
| ATOM | 3592 | HE22 | GLN | 264 | 34.118 | 85.020 | -11.800 |
| ATOM | 3593 | C    | GLN | 264 | 34.876 | 80.331 | -13.188 |
| ATOM | 3594 | O    | GLN | 264 | 33.832 | 80.137 | -13.810 |
| ATOM | 3595 | N    | ALA | 265 | 35.027 | 80.001 | -11.891 |
| ATOM | 3596 | H    | ALA | 265 | 35.827 | 80.150 | -11.507 |
| ATOM | 3597 | CA   | ALA | 265 | 33.962 | 79.429 | -11.125 |
| ATOM | 3598 | HA   | ALA | 265 | 33.043 | 79.332 | -11.702 |
| ATOM | 3599 | CB   | ALA | 265 | 34.359 | 78.054 | -10.609 |
| ATOM | 3600 | HB1  | ALA | 265 | 35.273 | 78.136 | -10.021 |
| ATOM | 3601 | HB2  | ALA | 265 | 33.560 | 77.655 | -9.984  |
| ATOM | 3602 | HB3  | ALA | 265 | 34.529 | 77.384 | -11.452 |
| ATOM | 3603 | C    | ALA | 265 | 33.667 | 80.393 | -10.021 |
| ATOM | 3604 | O    | ALA | 265 | 34.484 | 81.254 | -9.701  |
| ATOM | 3605 | N    | GLN | 266 | 32.464 | 80.287 | -9.425  |
| ATOM | 3606 | H    | GLN | 266 | 31.899 | 79.634 | -9.679  |
| ATOM | 3607 | CA   | GLN | 266 | 32.081 | 81.205 | -8.392  |
| ATOM | 3608 | HA   | GLN | 266 | 32.225 | 82.229 | -8.736  |
| ATOM | 3609 | CB   | GLN | 266 | 30.608 | 81.015 | -8.025  |
| ATOM | 3610 | HB2  | GLN | 266 | 30.484 | 79.975 | -7.723  |
| ATOM | 3611 | HB3  | GLN | 266 | 30.402 | 81.666 | -7.176  |
| ATOM | 3612 | CG   | GLN | 266 | 29.641 | 81.334 | -9.154  |
| ATOM | 3613 | HG2  | GLN | 266 | 29.916 | 80.744 | -10.028 |
| ATOM | 3614 | HG3  | GLN | 266 | 28.633 | 81.066 | -8.838  |
| ATOM | 3615 | CD   | GLN | 266 | 29.655 | 82.801 | -9.536  |
| ATOM | 3616 | OE1  | GLN | 266 | 29.399 | 83.671 | -8.704  |
| ATOM | 3617 | NE2  | GLN | 266 | 29.955 | 83.079 | -10.799 |
| ATOM | 3618 | HE21 | GLN | 266 | 29.978 | 83.934 | -11.078 |
| ATOM | 3619 | HE22 | GLN | 266 | 30.136 | 82.413 | -11.376 |
| ATOM | 3620 | C    | GLN | 266 | 32.944 | 81.032 | -7.179  |
| ATOM | 3621 | O    | GLN | 266 | 33.277 | 79.934 | -6.736  |
| ATOM | 3622 | N    | PRO | 267 | 33.314 | 82.186 | -6.684  |
| ATOM | 3623 | CD   | PRO | 267 | 32.956 | 83.551 | -7.261  |
| ATOM | 3624 | HD2  | PRO | 267 | 31.875 | 83.635 | -7.374  |

|      |      |      |     |     |        |        |        |
|------|------|------|-----|-----|--------|--------|--------|
| ATOM | 3625 | HD3  | PRO | 267 | 33.433 | 83.681 | -8.232 |
| ATOM | 3626 | CG   | PRO | 267 | 33.503 | 84.490 | -6.224 |
| ATOM | 3627 | HG2  | PRO | 267 | 32.720 | 84.733 | -5.506 |
| ATOM | 3628 | HG3  | PRO | 267 | 33.848 | 85.404 | -6.708 |
| ATOM | 3629 | CB   | PRO | 267 | 34.637 | 83.771 | -5.572 |
| ATOM | 3630 | HB2  | PRO | 267 | 34.836 | 84.116 | -4.557 |
| ATOM | 3631 | HB3  | PRO | 267 | 35.539 | 83.878 | -6.175 |
| ATOM | 3632 | CA   | PRO | 267 | 34.197 | 82.306 | -5.546 |
| ATOM | 3633 | HA   | PRO | 267 | 35.029 | 81.630 | -5.743 |
| ATOM | 3634 | C    | PRO | 267 | 33.609 | 81.995 | -4.202 |
| ATOM | 3635 | O    | PRO | 267 | 32.389 | 81.891 | -4.077 |
| ATOM | 3636 | N    | LEU | 268 | 34.495 | 81.856 | -3.186 |
| ATOM | 3637 | H    | LEU | 268 | 35.356 | 81.992 | -3.412 |
| ATOM | 3638 | CA   | LEU | 268 | 34.152 | 81.519 | -1.831 |
| ATOM | 3639 | HA   | LEU | 268 | 33.504 | 80.643 | -1.821 |
| ATOM | 3640 | CB   | LEU | 268 | 35.412 | 81.204 | -1.022 |
| ATOM | 3641 | HB2  | LEU | 268 | 36.166 | 81.870 | -1.441 |
| ATOM | 3642 | HB3  | LEU | 268 | 35.223 | 81.478 | 0.016  |
| ATOM | 3643 | CG   | LEU | 268 | 35.915 | 79.760 | -1.085 |
| ATOM | 3644 | HG   | LEU | 268 | 35.145 | 79.100 | -0.685 |
| ATOM | 3645 | CD1  | LEU | 268 | 36.228 | 79.362 | -2.519 |
| ATOM | 3646 | HD11 | LEU | 268 | 36.998 | 80.021 | -2.920 |
| ATOM | 3647 | HD12 | LEU | 268 | 36.584 | 78.332 | -2.541 |
| ATOM | 3648 | HD13 | LEU | 268 | 35.326 | 79.447 | -3.125 |
| ATOM | 3649 | CD2  | LEU | 268 | 37.143 | 79.580 | -0.206 |
| ATOM | 3650 | HD21 | LEU | 268 | 36.890 | 79.820 | 0.827  |
| ATOM | 3651 | HD22 | LEU | 268 | 37.484 | 78.547 | -0.265 |
| ATOM | 3652 | HD23 | LEU | 268 | 37.936 | 80.244 | -0.549 |
| ATOM | 3653 | C    | LEU | 268 | 33.388 | 82.671 | -1.243 |
| ATOM | 3654 | O    | LEU | 268 | 33.644 | 83.839 | -1.531 |
| ATOM | 3655 | N    | PRO | 269 | 32.345 | 82.323 | -0.538 |
| ATOM | 3656 | CD   | PRO | 269 | 31.705 | 80.966 | -0.563 |
| ATOM | 3657 | HD2  | PRO | 269 | 32.415 | 80.211 | -0.226 |
| ATOM | 3658 | HD3  | PRO | 269 | 31.375 | 80.727 | -1.574 |
| ATOM | 3659 | CG   | PRO | 269 | 30.555 | 81.143 | 0.389  |
| ATOM | 3660 | HG2  | PRO | 269 | 30.870 | 80.865 | 1.395  |
| ATOM | 3661 | HG3  | PRO | 269 | 29.726 | 80.507 | 0.079  |
| ATOM | 3662 | CB   | PRO | 269 | 30.176 | 82.584 | 0.316  |
| ATOM | 3663 | HB2  | PRO | 269 | 29.638 | 83.044 | 1.145  |
| ATOM | 3664 | HB3  | PRO | 269 | 29.563 | 82.629 | -0.584 |
| ATOM | 3665 | CA   | PRO | 269 | 31.499 | 83.317 | 0.084  |
| ATOM | 3666 | HA   | PRO | 269 | 31.422 | 84.055 | -0.715 |
| ATOM | 3667 | C    | PRO | 269 | 31.788 | 84.022 | 1.397  |
| ATOM | 3668 | O    | PRO | 269 | 31.343 | 85.161 | 1.432  |
| ATOM | 3669 | N    | PRO | 270 | 32.478 | 83.554 | 2.423  |
| ATOM | 3670 | CD   | PRO | 270 | 33.242 | 82.310 | 2.487  |
| ATOM | 3671 | HD2  | PRO | 270 | 34.256 | 82.478 | 2.123  |
| ATOM | 3672 | HD3  | PRO | 270 | 32.759 | 81.546 | 1.877  |
| ATOM | 3673 | CG   | PRO | 270 | 33.202 | 81.982 | 3.953  |
| ATOM | 3674 | HG2  | PRO | 270 | 34.086 | 81.402 | 4.219  |
| ATOM | 3675 | HG3  | PRO | 270 | 32.307 | 81.399 | 4.170  |
| ATOM | 3676 | CB   | PRO | 270 | 33.172 | 83.290 | 4.670  |

|      |      |      |     |     |        |        |        |
|------|------|------|-----|-----|--------|--------|--------|
| ATOM | 3677 | HB2  | PRO | 270 | 34.106 | 83.761 | 4.975  |
| ATOM | 3678 | HB3  | PRO | 270 | 32.572 | 83.070 | 5.553  |
| ATOM | 3679 | CA   | PRO | 270 | 32.401 | 84.222 | 3.733  |
| ATOM | 3680 | HA   | PRO | 270 | 31.328 | 84.191 | 3.921  |
| ATOM | 3681 | C    | PRO | 270 | 32.930 | 85.614 | 4.045  |
| ATOM | 3682 | O    | PRO | 270 | 33.784 | 86.121 | 3.318  |
| ATOM | 3683 | N    | ALA | 271 | 32.363 | 86.228 | 5.144  |
| ATOM | 3684 | H    | ALA | 271 | 31.934 | 85.654 | 5.688  |
| ATOM | 3685 | CA   | ALA | 271 | 32.404 | 87.646 | 5.469  |
| ATOM | 3686 | HA   | ALA | 271 | 33.316 | 88.059 | 5.038  |
| ATOM | 3687 | CB   | ALA | 271 | 31.210 | 88.364 | 4.859  |
| ATOM | 3688 | HB1  | ALA | 271 | 30.289 | 87.968 | 5.288  |
| ATOM | 3689 | HB2  | ALA | 271 | 31.280 | 89.431 | 5.071  |
| ATOM | 3690 | HB3  | ALA | 271 | 31.204 | 88.209 | 3.780  |
| ATOM | 3691 | C    | ALA | 271 | 32.433 | 87.904 | 6.951  |
| ATOM | 3692 | O    | ALA | 271 | 32.823 | 87.029 | 7.724  |
| ATOM | 3693 | N    | LEU | 272 | 32.031 | 89.147 | 7.368  |
| ATOM | 3694 | H    | LEU | 272 | 31.600 | 89.699 | 6.802  |
| ATOM | 3695 | CA   | LEU | 272 | 32.302 | 89.569 | 8.722  |
| ATOM | 3696 | HA   | LEU | 272 | 33.377 | 89.571 | 8.900  |
| ATOM | 3697 | CB   | LEU | 272 | 31.764 | 90.981 | 8.961  |
| ATOM | 3698 | HB2  | LEU | 272 | 32.229 | 91.575 | 8.175  |
| ATOM | 3699 | HB3  | LEU | 272 | 30.685 | 90.960 | 8.810  |
| ATOM | 3700 | CG   | LEU | 272 | 32.076 | 91.604 | 10.323 |
| ATOM | 3701 | HG   | LEU | 272 | 31.879 | 92.675 | 10.275 |
| ATOM | 3702 | CD1  | LEU | 272 | 31.215 | 90.979 | 11.410 |
| ATOM | 3703 | HD11 | LEU | 272 | 31.412 | 89.908 | 11.459 |
| ATOM | 3704 | HD12 | LEU | 272 | 31.453 | 91.436 | 12.370 |
| ATOM | 3705 | HD13 | LEU | 272 | 30.162 | 91.144 | 11.180 |
| ATOM | 3706 | CD2  | LEU | 272 | 33.551 | 91.447 | 10.661 |
| ATOM | 3707 | HD21 | LEU | 272 | 34.153 | 91.944 | 9.900  |
| ATOM | 3708 | HD22 | LEU | 272 | 33.751 | 91.897 | 11.633 |
| ATOM | 3709 | HD23 | LEU | 272 | 33.807 | 90.388 | 10.692 |
| ATOM | 3710 | C    | LEU | 272 | 31.733 | 88.660 | 9.755  |
| ATOM | 3711 | O    | LEU | 272 | 32.409 | 87.706 | 10.126 |
| ATOM | 3712 | N    | HIE | 273 | 30.446 | 88.852 | 10.138 |
| ATOM | 3713 | H    | HIE | 273 | 29.965 | 89.485 | 9.716  |
| ATOM | 3714 | CA   | HIE | 273 | 29.845 | 88.073 | 11.192 |
| ATOM | 3715 | HA   | HIE | 273 | 29.152 | 87.348 | 10.766 |
| ATOM | 3716 | CB   | HIE | 273 | 30.918 | 87.319 | 11.980 |
| ATOM | 3717 | HB2  | HIE | 273 | 31.669 | 88.015 | 12.352 |
| ATOM | 3718 | HB3  | HIE | 273 | 30.465 | 86.792 | 12.819 |
| ATOM | 3719 | CG   | HIE | 273 | 31.649 | 86.291 | 11.173 |
| ATOM | 3720 | ND1  | HIE | 273 | 31.078 | 85.095 | 10.798 |
| ATOM | 3721 | CE1  | HIE | 273 | 31.972 | 84.386 | 10.087 |
| ATOM | 3722 | HE1  | HIE | 273 | 31.658 | 83.409 | 9.720  |
| ATOM | 3723 | NE2  | HIE | 273 | 33.115 | 85.032 | 9.959  |
| ATOM | 3724 | HE2  | HIE | 273 | 33.872 | 84.733 | 9.509  |
| ATOM | 3725 | CD2  | HIE | 273 | 32.979 | 86.181 | 10.591 |
| ATOM | 3726 | HD2  | HIE | 273 | 33.807 | 86.889 | 10.619 |
| ATOM | 3727 | C    | HIE | 273 | 29.064 | 88.951 | 12.083 |
| ATOM | 3728 | O    | HIE | 273 | 29.502 | 90.033 | 12.459 |

|      |      |      |     |     |        |        |        |
|------|------|------|-----|-----|--------|--------|--------|
| ATOM | 3729 | N    | PRO | 274 | 27.918 | 88.501 | 12.474 |
| ATOM | 3730 | CD   | PRO | 274 | 27.056 | 87.457 | 11.856 |
| ATOM | 3731 | HD2  | PRO | 274 | 27.631 | 86.549 | 11.674 |
| ATOM | 3732 | HD3  | PRO | 274 | 26.639 | 87.817 | 10.916 |
| ATOM | 3733 | CG   | PRO | 274 | 26.006 | 87.272 | 12.915 |
| ATOM | 3734 | HG2  | PRO | 274 | 26.315 | 86.481 | 13.599 |
| ATOM | 3735 | HG3  | PRO | 274 | 25.062 | 86.997 | 12.446 |
| ATOM | 3736 | CB   | PRO | 274 | 25.890 | 88.584 | 13.616 |
| ATOM | 3737 | HB2  | PRO | 274 | 25.668 | 88.224 | 14.620 |
| ATOM | 3738 | HB3  | PRO | 274 | 25.164 | 89.348 | 13.336 |
| ATOM | 3739 | CA   | PRO | 274 | 27.304 | 89.167 | 13.573 |
| ATOM | 3740 | HA   | PRO | 274 | 27.309 | 90.254 | 13.490 |
| ATOM | 3741 | C    | PRO | 274 | 28.210 | 88.751 | 14.675 |
| ATOM | 3742 | O    | PRO | 274 | 28.342 | 89.440 | 15.681 |
| ATOM | 3743 | N    | ARG | 275 | 28.824 | 87.574 | 14.517 |
| ATOM | 3744 | H    | ARG | 275 | 28.607 | 87.029 | 13.835 |
| ATOM | 3745 | CA   | ARG | 275 | 29.828 | 87.188 | 15.440 |
| ATOM | 3746 | HA   | ARG | 275 | 30.516 | 88.017 | 15.605 |
| ATOM | 3747 | CB   | ARG | 275 | 29.202 | 86.798 | 16.781 |
| ATOM | 3748 | HB2  | ARG | 275 | 28.493 | 85.995 | 16.583 |
| ATOM | 3749 | HB3  | ARG | 275 | 30.006 | 86.424 | 17.414 |
| ATOM | 3750 | CG   | ARG | 275 | 28.490 | 87.939 | 17.488 |
| ATOM | 3751 | HG2  | ARG | 275 | 27.805 | 88.411 | 16.783 |
| ATOM | 3752 | HG3  | ARG | 275 | 27.924 | 87.530 | 18.325 |
| ATOM | 3753 | CD   | ARG | 275 | 29.479 | 88.973 | 18.003 |
| ATOM | 3754 | HD2  | ARG | 275 | 30.203 | 88.480 | 18.652 |
| ATOM | 3755 | HD3  | ARG | 275 | 29.998 | 89.420 | 17.155 |
| ATOM | 3756 | NE   | ARG | 275 | 28.818 | 90.034 | 18.759 |
| ATOM | 3757 | HE   | ARG | 275 | 28.771 | 89.936 | 19.613 |
| ATOM | 3758 | CZ   | ARG | 275 | 28.292 | 91.125 | 18.212 |
| ATOM | 3759 | NH1  | ARG | 275 | 27.710 | 92.037 | 18.979 |
| ATOM | 3760 | HH11 | ARG | 275 | 27.673 | 91.922 | 19.830 |
| ATOM | 3761 | HH12 | ARG | 275 | 27.370 | 92.743 | 18.625 |
| ATOM | 3762 | NH2  | ARG | 275 | 28.349 | 91.301 | 16.899 |
| ATOM | 3763 | HH21 | ARG | 275 | 28.726 | 90.710 | 16.402 |
| ATOM | 3764 | HH22 | ARG | 275 | 28.009 | 92.007 | 16.545 |
| ATOM | 3765 | C    | ARG | 275 | 30.564 | 86.074 | 14.814 |
| ATOM | 3766 | O    | ARG | 275 | 29.980 | 85.076 | 14.394 |
| ATOM | 3767 | N    | ARG | 276 | 31.888 | 86.240 | 14.693 |
| ATOM | 3768 | H    | ARG | 276 | 32.298 | 87.021 | 14.873 |
| ATOM | 3769 | CA   | ARG | 276 | 32.649 | 85.122 | 14.261 |
| ATOM | 3770 | HA   | ARG | 276 | 32.207 | 84.701 | 13.358 |
| ATOM | 3771 | CB   | ARG | 276 | 34.088 | 85.540 | 13.952 |
| ATOM | 3772 | HB2  | ARG | 276 | 34.585 | 84.678 | 13.508 |
| ATOM | 3773 | HB3  | ARG | 276 | 34.038 | 86.347 | 13.221 |
| ATOM | 3774 | CG   | ARG | 276 | 34.873 | 86.006 | 15.168 |
| ATOM | 3775 | HG2  | ARG | 276 | 34.314 | 86.803 | 15.658 |
| ATOM | 3776 | HG3  | ARG | 276 | 34.983 | 85.166 | 15.854 |
| ATOM | 3777 | CD   | ARG | 276 | 36.248 | 86.520 | 14.773 |
| ATOM | 3778 | HD2  | ARG | 276 | 36.789 | 85.728 | 14.255 |
| ATOM | 3779 | HD3  | ARG | 276 | 36.129 | 87.374 | 14.106 |
| ATOM | 3780 | NE   | ARG | 276 | 37.030 | 86.939 | 15.934 |



|      |      |      |     |     |        |        |        |
|------|------|------|-----|-----|--------|--------|--------|
| ATOM | 3781 | HE   | ARG | 276 | 36.673 | 86.824 | 16.709 |
| ATOM | 3782 | CZ   | ARG | 276 | 38.242 | 87.480 | 15.863 |
| ATOM | 3783 | NH1  | ARG | 276 | 38.878 | 87.830 | 16.972 |
| ATOM | 3784 | HH11 | ARG | 276 | 38.506 | 87.707 | 17.738 |
| ATOM | 3785 | HH12 | ARG | 276 | 39.662 | 88.180 | 16.926 |
| ATOM | 3786 | NH2  | ARG | 276 | 38.815 | 87.669 | 14.682 |
| ATOM | 3787 | HH21 | ARG | 276 | 38.403 | 87.441 | 13.963 |
| ATOM | 3788 | HH22 | ARG | 276 | 39.599 | 88.019 | 14.636 |
| ATOM | 3789 | C    | ARG | 276 | 32.484 | 84.224 | 15.412 |
| ATOM | 3790 | O    | ARG | 276 | 32.450 | 83.005 | 15.278 |
| ATOM | 3791 | N    | ALA | 277 | 32.376 | 84.862 | 16.592 |
| ATOM | 3792 | H    | ALA | 277 | 32.387 | 85.762 | 16.599 |
| ATOM | 3793 | CA   | ALA | 277 | 32.246 | 84.143 | 17.812 |
| ATOM | 3794 | HA   | ALA | 277 | 33.079 | 83.452 | 17.943 |
| ATOM | 3795 | CB   | ALA | 277 | 32.220 | 85.102 | 18.992 |
| ATOM | 3796 | HB1  | ALA | 277 | 31.386 | 85.795 | 18.880 |
| ATOM | 3797 | HB2  | ALA | 277 | 32.101 | 84.538 | 19.917 |
| ATOM | 3798 | HB3  | ALA | 277 | 33.155 | 85.662 | 19.026 |
| ATOM | 3799 | C    | ALA | 277 | 31.005 | 83.320 | 17.751 |
| ATOM | 3800 | O    | ALA | 277 | 31.037 | 82.142 | 18.097 |
| ATOM | 3801 | N    | GLN | 278 | 29.876 | 83.883 | 17.281 |
| ATOM | 3802 | H    | GLN | 278 | 29.821 | 84.719 | 16.953 |
| ATOM | 3803 | CA   | GLN | 278 | 28.706 | 83.051 | 17.327 |
| ATOM | 3804 | HA   | GLN | 278 | 28.573 | 82.656 | 18.334 |
| ATOM | 3805 | CB   | GLN | 278 | 27.461 | 83.856 | 16.950 |
| ATOM | 3806 | HB2  | GLN | 278 | 27.435 | 84.730 | 17.601 |
| ATOM | 3807 | HB3  | GLN | 278 | 27.587 | 84.177 | 15.916 |
| ATOM | 3808 | CG   | GLN | 278 | 26.158 | 83.085 | 17.085 |
| ATOM | 3809 | HG2  | GLN | 278 | 25.340 | 83.711 | 16.728 |
| ATOM | 3810 | HG3  | GLN | 278 | 26.219 | 82.185 | 16.473 |
| ATOM | 3811 | CD   | GLN | 278 | 25.868 | 82.679 | 18.517 |
| ATOM | 3812 | OE1  | GLN | 278 | 25.845 | 83.517 | 19.417 |
| ATOM | 3813 | NE2  | GLN | 278 | 25.644 | 81.387 | 18.731 |
| ATOM | 3814 | HE21 | GLN | 278 | 25.467 | 81.093 | 19.562 |
| ATOM | 3815 | HE22 | GLN | 278 | 25.670 | 80.806 | 18.044 |
| ATOM | 3816 | C    | GLN | 278 | 28.889 | 81.883 | 16.407 |
| ATOM | 3817 | O    | GLN | 278 | 28.538 | 80.753 | 16.746 |
| ATOM | 3818 | N    | ARG | 279 | 29.468 | 82.126 | 15.218 |
| ATOM | 3819 | H    | ARG | 279 | 29.715 | 82.968 | 15.018 |
| ATOM | 3820 | CA   | ARG | 279 | 29.694 | 81.066 | 14.272 |
| ATOM | 3821 | HA   | ARG | 279 | 28.766 | 80.520 | 14.101 |
| ATOM | 3822 | CB   | ARG | 279 | 30.180 | 81.634 | 12.937 |
| ATOM | 3823 | HB2  | ARG | 279 | 29.421 | 82.336 | 12.591 |
| ATOM | 3824 | HB3  | ARG | 279 | 31.108 | 82.171 | 13.135 |
| ATOM | 3825 | CG   | ARG | 279 | 30.422 | 80.582 | 11.867 |
| ATOM | 3826 | HG2  | ARG | 279 | 30.834 | 81.072 | 10.985 |
| ATOM | 3827 | HG3  | ARG | 279 | 31.142 | 79.858 | 12.249 |
| ATOM | 3828 | CD   | ARG | 279 | 29.134 | 79.867 | 11.494 |
| ATOM | 3829 | HD2  | ARG | 279 | 28.740 | 79.363 | 12.376 |
| ATOM | 3830 | HD3  | ARG | 279 | 28.410 | 80.602 | 11.142 |
| ATOM | 3831 | NE   | ARG | 279 | 29.343 | 78.875 | 10.442 |
| ATOM | 3832 | HE   | ARG | 279 | 30.100 | 78.893 | 10.031 |

|      |      |      |     |     |        |        |        |
|------|------|------|-----|-----|--------|--------|--------|
| ATOM | 3833 | CZ   | ARG | 279 | 28.446 | 77.961 | 10.088 |
| ATOM | 3834 | NH1  | ARG | 279 | 28.725 | 77.099 | 9.120  |
| ATOM | 3835 | HH11 | ARG | 279 | 29.486 | 77.131 | 8.720  |
| ATOM | 3836 | HH12 | ARG | 279 | 28.144 | 76.507 | 8.891  |
| ATOM | 3837 | NH2  | ARG | 279 | 27.273 | 77.910 | 10.703 |
| ATOM | 3838 | HH21 | ARG | 279 | 27.092 | 78.469 | 11.331 |
| ATOM | 3839 | HH22 | ARG | 279 | 26.692 | 77.319 | 10.474 |
| ATOM | 3840 | C    | ARG | 279 | 30.688 | 80.083 | 14.819 |
| ATOM | 3841 | O    | ARG | 279 | 30.640 | 78.893 | 14.497 |
| ATOM | 3842 | N    | ARG | 280 | 31.617 | 80.560 | 15.666 |
| ATOM | 3843 | H    | ARG | 280 | 31.606 | 81.439 | 15.857 |
| ATOM | 3844 | CA   | ARG | 280 | 32.608 | 79.708 | 16.261 |
| ATOM | 3845 | HA   | ARG | 280 | 33.149 | 79.171 | 15.482 |
| ATOM | 3846 | CB   | ARG | 280 | 33.609 | 80.535 | 17.071 |
| ATOM | 3847 | HB2  | ARG | 280 | 34.038 | 81.274 | 16.394 |
| ATOM | 3848 | HB3  | ARG | 280 | 33.047 | 81.043 | 17.854 |
| ATOM | 3849 | CG   | ARG | 280 | 34.725 | 79.716 | 17.699 |
| ATOM | 3850 | HG2  | ARG | 280 | 34.288 | 79.034 | 18.429 |
| ATOM | 3851 | HG3  | ARG | 280 | 35.218 | 79.141 | 16.915 |
| ATOM | 3852 | CD   | ARG | 280 | 35.744 | 80.610 | 18.388 |
| ATOM | 3853 | HD2  | ARG | 280 | 36.206 | 81.261 | 17.646 |
| ATOM | 3854 | HD3  | ARG | 280 | 35.233 | 81.217 | 19.136 |
| ATOM | 3855 | NE   | ARG | 280 | 36.792 | 79.836 | 19.049 |
| ATOM | 3856 | HE   | ARG | 280 | 36.741 | 78.978 | 18.993 |
| ATOM | 3857 | CZ   | ARG | 280 | 37.804 | 80.372 | 19.724 |
| ATOM | 3858 | NH1  | ARG | 280 | 38.710 | 79.589 | 20.293 |
| ATOM | 3859 | HH11 | ARG | 280 | 38.643 | 78.734 | 20.225 |
| ATOM | 3860 | HH12 | ARG | 280 | 39.365 | 79.936 | 20.729 |
| ATOM | 3861 | NH2  | ARG | 280 | 37.907 | 81.690 | 19.827 |
| ATOM | 3862 | HH21 | ARG | 280 | 37.319 | 82.197 | 19.458 |
| ATOM | 3863 | HH22 | ARG | 280 | 38.562 | 82.037 | 20.264 |
| ATOM | 3864 | C    | ARG | 280 | 31.930 | 78.685 | 17.125 |
| ATOM | 3865 | O    | ARG | 280 | 32.365 | 77.536 | 17.180 |
| ATOM | 3866 | N    | LEU | 281 | 30.852 | 79.067 | 17.841 |
| ATOM | 3867 | H    | LEU | 281 | 30.534 | 79.908 | 17.801 |
| ATOM | 3868 | CA   | LEU | 281 | 30.209 | 78.094 | 18.682 |
| ATOM | 3869 | HA   | LEU | 281 | 30.932 | 77.675 | 19.382 |
| ATOM | 3870 | CB   | LEU | 281 | 29.075 | 78.741 | 19.480 |
| ATOM | 3871 | HB2  | LEU | 281 | 29.578 | 79.494 | 20.086 |
| ATOM | 3872 | HB3  | LEU | 281 | 28.404 | 79.231 | 18.775 |
| ATOM | 3873 | CG   | LEU | 281 | 28.269 | 77.811 | 20.389 |
| ATOM | 3874 | HG   | LEU | 281 | 27.825 | 77.022 | 19.782 |
| ATOM | 3875 | CD1  | LEU | 281 | 29.163 | 77.190 | 21.452 |
| ATOM | 3876 | HD11 | LEU | 281 | 29.607 | 77.978 | 22.060 |
| ATOM | 3877 | HD12 | LEU | 281 | 28.570 | 76.532 | 22.087 |
| ATOM | 3878 | HD13 | LEU | 281 | 29.954 | 76.614 | 20.971 |
| ATOM | 3879 | CD2  | LEU | 281 | 27.116 | 78.561 | 21.039 |
| ATOM | 3880 | HD21 | LEU | 281 | 26.457 | 78.956 | 20.266 |
| ATOM | 3881 | HD22 | LEU | 281 | 26.556 | 77.881 | 21.681 |
| ATOM | 3882 | HD23 | LEU | 281 | 27.508 | 79.384 | 21.636 |
| ATOM | 3883 | C    | LEU | 281 | 29.697 | 76.969 | 17.838 |
| ATOM | 3884 | O    | LEU | 281 | 29.882 | 75.803 | 18.183 |

|      |      |      |     |     |        |        |        |
|------|------|------|-----|-----|--------|--------|--------|
| ATOM | 3885 | N    | SER | 282 | 29.044 | 77.273 | 16.700 |
| ATOM | 3886 | H    | SER | 282 | 28.860 | 78.123 | 16.468 |
| ATOM | 3887 | CA   | SER | 282 | 28.638 | 76.191 | 15.845 |
| ATOM | 3888 | HA   | SER | 282 | 28.143 | 75.420 | 16.435 |
| ATOM | 3889 | CB   | SER | 282 | 27.663 | 76.689 | 14.776 |
| ATOM | 3890 | HB2  | SER | 282 | 27.251 | 75.828 | 14.250 |
| ATOM | 3891 | HB3  | SER | 282 | 26.856 | 77.235 | 15.266 |
| ATOM | 3892 | OG   | SER | 282 | 28.315 | 77.541 | 13.849 |
| ATOM | 3893 | HG   | SER | 282 | 28.628 | 78.196 | 14.250 |
| ATOM | 3894 | C    | SER | 282 | 29.933 | 75.690 | 15.311 |
| ATOM | 3895 | O    | SER | 282 | 30.954 | 76.298 | 15.495 |
| ATOM | 3896 | N    | GLY | 283 | 30.081 | 74.544 | 14.694 |
| ATOM | 3897 | H    | GLY | 283 | 29.486 | 73.891 | 14.520 |
| ATOM | 3898 | CA   | GLY | 283 | 31.450 | 74.404 | 14.265 |
| ATOM | 3899 | HA2  | GLY | 283 | 31.505 | 73.796 | 13.362 |
| ATOM | 3900 | HA3  | GLY | 283 | 31.890 | 75.382 | 14.072 |
| ATOM | 3901 | C    | GLY | 283 | 32.226 | 73.727 | 15.357 |
| ATOM | 3902 | O    | GLY | 283 | 32.885 | 72.716 | 15.128 |
| ATOM | 3903 | N    | LEU | 284 | 32.222 | 74.304 | 16.576 |
| ATOM | 3904 | H    | LEU | 284 | 31.841 | 75.111 | 16.692 |
| ATOM | 3905 | CA   | LEU | 284 | 32.822 | 73.634 | 17.682 |
| ATOM | 3906 | HA   | LEU | 284 | 33.791 | 73.231 | 17.388 |
| ATOM | 3907 | CB   | LEU | 284 | 33.029 | 74.603 | 18.847 |
| ATOM | 3908 | HB2  | LEU | 284 | 32.048 | 75.056 | 18.987 |
| ATOM | 3909 | HB3  | LEU | 284 | 33.288 | 74.019 | 19.730 |
| ATOM | 3910 | CG   | LEU | 284 | 34.073 | 75.702 | 18.638 |
| ATOM | 3911 | HG   | LEU | 284 | 33.852 | 76.226 | 17.708 |
| ATOM | 3912 | CD1  | LEU | 284 | 34.053 | 76.691 | 19.793 |
| ATOM | 3913 | HD11 | LEU | 284 | 34.274 | 76.168 | 20.723 |
| ATOM | 3914 | HD12 | LEU | 284 | 34.803 | 77.464 | 19.624 |
| ATOM | 3915 | HD13 | LEU | 284 | 33.067 | 77.151 | 19.861 |
| ATOM | 3916 | CD2  | LEU | 284 | 35.462 | 75.101 | 18.479 |
| ATOM | 3917 | HD21 | LEU | 284 | 35.474 | 74.435 | 17.616 |
| ATOM | 3918 | HD22 | LEU | 284 | 36.189 | 75.899 | 18.332 |
| ATOM | 3919 | HD23 | LEU | 284 | 35.719 | 74.537 | 19.376 |
| ATOM | 3920 | C    | LEU | 284 | 31.866 | 72.531 | 17.968 |
| ATOM | 3921 | O    | LEU | 284 | 32.251 | 71.389 | 18.215 |
| ATOM | 3922 | N    | SER | 285 | 30.561 | 72.868 | 17.904 |
| ATOM | 3923 | H    | SER | 285 | 30.328 | 73.719 | 17.729 |
| ATOM | 3924 | CA   | SER | 285 | 29.549 | 71.877 | 18.113 |
| ATOM | 3925 | HA   | SER | 285 | 29.739 | 71.346 | 19.046 |
| ATOM | 3926 | CB   | SER | 285 | 28.168 | 72.530 | 18.195 |
| ATOM | 3927 | HB2  | SER | 285 | 28.167 | 73.240 | 19.022 |
| ATOM | 3928 | HB3  | SER | 285 | 27.977 | 73.059 | 17.262 |
| ATOM | 3929 | OG   | SER | 285 | 27.156 | 71.561 | 18.404 |
| ATOM | 3930 | HG   | SER | 285 | 27.303 | 71.158 | 19.115 |
| ATOM | 3931 | C    | SER | 285 | 29.664 | 70.917 | 16.977 |
| ATOM | 3932 | O    | SER | 285 | 29.515 | 69.709 | 17.168 |
| ATOM | 3933 | N    | VAL | 286 | 29.939 | 71.427 | 15.753 |
| ATOM | 3934 | H    | VAL | 286 | 30.081 | 72.302 | 15.597 |
| ATOM | 3935 | CA   | VAL | 286 | 29.998 | 70.483 | 14.667 |
| ATOM | 3936 | HA   | VAL | 286 | 29.140 | 69.811 | 14.675 |

|      |      |      |     |     |        |        |        |
|------|------|------|-----|-----|--------|--------|--------|
| ATOM | 3937 | CB   | VAL | 286 | 30.053 | 71.195 | 13.303 |
| ATOM | 3938 | HB   | VAL | 286 | 30.863 | 71.924 | 13.316 |
| ATOM | 3939 | CG1  | VAL | 286 | 30.293 | 70.190 | 12.186 |
| ATOM | 3940 | HG11 | VAL | 286 | 29.483 | 69.461 | 12.172 |
| ATOM | 3941 | HG12 | VAL | 286 | 30.329 | 70.711 | 11.229 |
| ATOM | 3942 | HG13 | VAL | 286 | 31.240 | 69.677 | 12.355 |
| ATOM | 3943 | CG2  | VAL | 286 | 28.770 | 71.974 | 13.056 |
| ATOM | 3944 | HG21 | VAL | 286 | 28.641 | 72.721 | 13.840 |
| ATOM | 3945 | HG22 | VAL | 286 | 28.827 | 72.471 | 12.087 |
| ATOM | 3946 | HG23 | VAL | 286 | 27.922 | 71.290 | 13.064 |
| ATOM | 3947 | C    | VAL | 286 | 31.187 | 69.588 | 14.843 |
| ATOM | 3948 | O    | VAL | 286 | 31.113 | 68.386 | 14.591 |
| ATOM | 3949 | N    | LEU | 287 | 32.324 | 70.159 | 15.283 |
| ATOM | 3950 | H    | LEU | 287 | 32.313 | 71.034 | 15.492 |
| ATOM | 3951 | CA   | LEU | 287 | 33.538 | 69.402 | 15.422 |
| ATOM | 3952 | HA   | LEU | 287 | 33.765 | 68.893 | 14.485 |
| ATOM | 3953 | CB   | LEU | 287 | 34.707 | 70.324 | 15.774 |
| ATOM | 3954 | HB2  | LEU | 287 | 34.745 | 71.028 | 14.943 |
| ATOM | 3955 | HB3  | LEU | 287 | 34.452 | 70.857 | 16.690 |
| ATOM | 3956 | CG   | LEU | 287 | 36.073 | 69.655 | 15.938 |
| ATOM | 3957 | HG   | LEU | 287 | 36.011 | 68.918 | 16.738 |
| ATOM | 3958 | CD1  | LEU | 287 | 36.493 | 68.968 | 14.647 |
| ATOM | 3959 | HD11 | LEU | 287 | 36.556 | 69.705 | 13.846 |
| ATOM | 3960 | HD12 | LEU | 287 | 37.467 | 68.499 | 14.785 |
| ATOM | 3961 | HD13 | LEU | 287 | 35.758 | 68.208 | 14.384 |
| ATOM | 3962 | CD2  | LEU | 287 | 37.122 | 70.670 | 16.362 |
| ATOM | 3963 | HD21 | LEU | 287 | 36.833 | 71.116 | 17.313 |
| ATOM | 3964 | HD22 | LEU | 287 | 38.086 | 70.173 | 16.473 |
| ATOM | 3965 | HD23 | LEU | 287 | 37.201 | 71.450 | 15.604 |
| ATOM | 3966 | C    | LEU | 287 | 33.360 | 68.343 | 16.471 |
| ATOM | 3967 | O    | LEU | 287 | 33.767 | 67.198 | 16.278 |
| ATOM | 3968 | N    | LEU | 288 | 32.736 | 68.698 | 17.611 |
| ATOM | 3969 | H    | LEU | 288 | 32.402 | 69.531 | 17.675 |
| ATOM | 3970 | CA   | LEU | 288 | 32.598 | 67.781 | 18.710 |
| ATOM | 3971 | HA   | LEU | 288 | 33.572 | 67.365 | 18.968 |
| ATOM | 3972 | CB   | LEU | 288 | 32.032 | 68.497 | 19.938 |
| ATOM | 3973 | HB2  | LEU | 288 | 31.136 | 68.991 | 19.563 |
| ATOM | 3974 | HB3  | LEU | 288 | 31.750 | 67.740 | 20.669 |
| ATOM | 3975 | CG   | LEU | 288 | 32.944 | 69.531 | 20.601 |
| ATOM | 3976 | HG   | LEU | 288 | 33.288 | 70.235 | 19.843 |
| ATOM | 3977 | CD1  | LEU | 288 | 32.199 | 70.285 | 21.691 |
| ATOM | 3978 | HD11 | LEU | 288 | 31.855 | 69.582 | 22.449 |
| ATOM | 3979 | HD12 | LEU | 288 | 32.866 | 71.015 | 22.149 |
| ATOM | 3980 | HD13 | LEU | 288 | 31.342 | 70.799 | 21.257 |
| ATOM | 3981 | CD2  | LEU | 288 | 34.186 | 68.863 | 21.173 |
| ATOM | 3982 | HD21 | LEU | 288 | 34.736 | 68.370 | 20.371 |
| ATOM | 3983 | HD22 | LEU | 288 | 34.821 | 69.615 | 21.640 |
| ATOM | 3984 | HD23 | LEU | 288 | 33.891 | 68.124 | 21.918 |
| ATOM | 3985 | C    | LEU | 288 | 31.716 | 66.647 | 18.288 |
| ATOM | 3986 | O    | LEU | 288 | 31.953 | 65.497 | 18.657 |
| ATOM | 3987 | N    | LEU | 289 | 30.666 | 66.945 | 17.502 |
| ATOM | 3988 | H    | LEU | 289 | 30.545 | 67.796 | 17.235 |

|      |      |      |     |     |        |        |        |
|------|------|------|-----|-----|--------|--------|--------|
| ATOM | 3989 | CA   | LEU | 289 | 29.743 | 65.925 | 17.088 |
| ATOM | 3990 | HA   | LEU | 289 | 29.346 | 65.409 | 17.963 |
| ATOM | 3991 | CB   | LEU | 289 | 28.577 | 66.540 | 16.312 |
| ATOM | 3992 | HB2  | LEU | 289 | 28.135 | 67.244 | 17.017 |
| ATOM | 3993 | HB3  | LEU | 289 | 28.988 | 67.087 | 15.463 |
| ATOM | 3994 | CG   | LEU | 289 | 27.502 | 65.569 | 15.820 |
| ATOM | 3995 | HG   | LEU | 289 | 27.963 | 64.839 | 15.155 |
| ATOM | 3996 | CD1  | LEU | 289 | 26.853 | 64.848 | 16.992 |
| ATOM | 3997 | HD11 | LEU | 289 | 26.391 | 65.577 | 17.657 |
| ATOM | 3998 | HD12 | LEU | 289 | 26.091 | 64.162 | 16.621 |
| ATOM | 3999 | HD13 | LEU | 289 | 27.611 | 64.287 | 17.539 |
| ATOM | 4000 | CD2  | LEU | 289 | 26.450 | 66.301 | 15.001 |
| ATOM | 4001 | HD21 | LEU | 289 | 26.922 | 66.770 | 14.138 |
| ATOM | 4002 | HD22 | LEU | 289 | 25.695 | 65.592 | 14.661 |
| ATOM | 4003 | HD23 | LEU | 289 | 25.978 | 67.067 | 15.616 |
| ATOM | 4004 | C    | LEU | 289 | 30.495 | 64.929 | 16.262 |
| ATOM | 4005 | O    | LEU | 289 | 30.238 | 63.728 | 16.332 |
| ATOM | 4006 | N    | CYS | 290 | 31.437 | 65.402 | 15.430 |
| ATOM | 4007 | H    | CYS | 290 | 31.609 | 66.284 | 15.388 |
| ATOM | 4008 | CA   | CYS | 290 | 32.171 | 64.488 | 14.604 |
| ATOM | 4009 | HA   | CYS | 290 | 31.479 | 63.879 | 14.022 |
| ATOM | 4010 | CB   | CYS | 290 | 33.082 | 65.250 | 13.640 |
| ATOM | 4011 | HB2  | CYS | 290 | 33.665 | 65.995 | 14.181 |
| ATOM | 4012 | HB3  | CYS | 290 | 33.756 | 64.560 | 13.132 |
| ATOM | 4013 | SG   | CYS | 290 | 32.207 | 66.147 | 12.336 |
| ATOM | 4014 | HG   | CYS | 290 | 33.295 | 66.642 | 11.753 |
| ATOM | 4015 | C    | CYS | 290 | 32.965 | 63.559 | 15.470 |
| ATOM | 4016 | O    | CYS | 290 | 32.967 | 62.348 | 15.255 |
| ATOM | 4017 | N    | CYS | 291 | 33.645 | 64.103 | 16.494 |
| ATOM | 4018 | H    | CYS | 291 | 33.561 | 64.984 | 16.657 |
| ATOM | 4019 | CA   | CYS | 291 | 34.497 | 63.298 | 17.322 |
| ATOM | 4020 | HA   | CYS | 291 | 35.224 | 62.772 | 16.703 |
| ATOM | 4021 | CB   | CYS | 291 | 35.251 | 64.173 | 18.325 |
| ATOM | 4022 | HB2  | CYS | 291 | 34.560 | 64.843 | 18.836 |
| ATOM | 4023 | HB3  | CYS | 291 | 35.763 | 63.551 | 19.059 |
| ATOM | 4024 | SG   | CYS | 291 | 36.521 | 65.229 | 17.589 |
| ATOM | 4025 | HG   | CYS | 291 | 36.913 | 65.790 | 18.729 |
| ATOM | 4026 | C    | CYS | 291 | 33.684 | 62.260 | 18.029 |
| ATOM | 4027 | O    | CYS | 291 | 34.083 | 61.102 | 18.115 |
| ATOM | 4028 | N    | VAL | 292 | 32.519 | 62.654 | 18.568 |
| ATOM | 4029 | H    | VAL | 292 | 32.250 | 63.504 | 18.446 |
| ATOM | 4030 | CA   | VAL | 292 | 31.708 | 61.748 | 19.326 |
| ATOM | 4031 | HA   | VAL | 292 | 32.290 | 61.236 | 20.092 |
| ATOM | 4032 | CB   | VAL | 292 | 30.533 | 62.476 | 20.005 |
| ATOM | 4033 | HB   | VAL | 292 | 29.994 | 63.056 | 19.255 |
| ATOM | 4034 | CG1  | VAL | 292 | 29.586 | 61.474 | 20.648 |
| ATOM | 4035 | HG11 | VAL | 292 | 30.124 | 60.894 | 21.398 |
| ATOM | 4036 | HG12 | VAL | 292 | 28.762 | 62.006 | 21.123 |
| ATOM | 4037 | HG13 | VAL | 292 | 29.193 | 60.803 | 19.884 |
| ATOM | 4038 | CG2  | VAL | 292 | 31.046 | 63.468 | 21.038 |
| ATOM | 4039 | HG21 | VAL | 292 | 31.684 | 64.205 | 20.550 |
| ATOM | 4040 | HG22 | VAL | 292 | 30.202 | 63.973 | 21.508 |

|      |      |      |     |     |        |        |        |
|------|------|------|-----|-----|--------|--------|--------|
| ATOM | 4041 | HG23 | VAL | 292 | 31.620 | 62.938 | 21.798 |
| ATOM | 4042 | C    | VAL | 292 | 31.158 | 60.611 | 18.502 |
| ATOM | 4043 | O    | VAL | 292 | 31.231 | 59.457 | 18.922 |
| ATOM | 4044 | N    | PHE | 293 | 30.546 | 60.930 | 17.344 |
| ATOM | 4045 | H    | PHE | 293 | 30.592 | 61.808 | 17.154 |
| ATOM | 4046 | CA   | PHE | 293 | 29.865 | 60.030 | 16.441 |
| ATOM | 4047 | HA   | PHE | 293 | 29.310 | 59.285 | 17.011 |
| ATOM | 4048 | CB   | PHE | 293 | 28.883 | 60.800 | 15.556 |
| ATOM | 4049 | HB2  | PHE | 293 | 29.371 | 61.679 | 15.134 |
| ATOM | 4050 | HB3  | PHE | 293 | 28.524 | 60.161 | 14.749 |
| ATOM | 4051 | CG   | PHE | 293 | 27.666 | 61.293 | 16.287 |
| ATOM | 4052 | CD1  | PHE | 293 | 27.287 | 60.724 | 17.490 |
| ATOM | 4053 | HD1  | PHE | 293 | 27.881 | 59.910 | 17.906 |
| ATOM | 4054 | CE1  | PHE | 293 | 26.168 | 61.177 | 18.163 |
| ATOM | 4055 | HE1  | PHE | 293 | 25.880 | 60.722 | 19.111 |
| ATOM | 4056 | CZ   | PHE | 293 | 25.414 | 62.208 | 17.634 |
| ATOM | 4057 | HZ   | PHE | 293 | 24.530 | 62.569 | 18.160 |
| ATOM | 4058 | CE2  | PHE | 293 | 25.782 | 62.776 | 16.443 |
| ATOM | 4059 | HE2  | PHE | 293 | 25.188 | 63.589 | 16.026 |
| ATOM | 4060 | CD2  | PHE | 293 | 26.901 | 62.323 | 15.771 |
| ATOM | 4061 | HD2  | PHE | 293 | 27.189 | 62.778 | 14.823 |
| ATOM | 4062 | C    | PHE | 293 | 30.746 | 59.211 | 15.527 |
| ATOM | 4063 | O    | PHE | 293 | 30.468 | 58.037 | 15.280 |
| ATOM | 4064 | N    | LEU | 294 | 31.835 | 59.804 | 15.002 |
| ATOM | 4065 | H    | LEU | 294 | 32.069 | 60.605 | 15.338 |
| ATOM | 4066 | CA   | LEU | 294 | 32.616 | 59.209 | 13.946 |
| ATOM | 4067 | HA   | LEU | 294 | 31.983 | 59.025 | 13.078 |
| ATOM | 4068 | CB   | LEU | 294 | 33.756 | 60.142 | 13.532 |
| ATOM | 4069 | HB2  | LEU | 294 | 33.249 | 61.053 | 13.216 |
| ATOM | 4070 | HB3  | LEU | 294 | 34.359 | 60.350 | 14.416 |
| ATOM | 4071 | CG   | LEU | 294 | 34.662 | 59.645 | 12.403 |
| ATOM | 4072 | HG   | LEU | 294 | 35.126 | 58.708 | 12.710 |
| ATOM | 4073 | CD1  | LEU | 294 | 33.860 | 59.420 | 11.130 |
| ATOM | 4074 | HD11 | LEU | 294 | 33.396 | 60.357 | 10.822 |
| ATOM | 4075 | HD12 | LEU | 294 | 34.523 | 59.067 | 10.340 |
| ATOM | 4076 | HD13 | LEU | 294 | 33.086 | 58.675 | 11.314 |
| ATOM | 4077 | CD2  | LEU | 294 | 35.792 | 60.631 | 12.149 |
| ATOM | 4078 | HD21 | LEU | 294 | 36.387 | 60.743 | 13.055 |
| ATOM | 4079 | HD22 | LEU | 294 | 36.425 | 60.259 | 11.343 |
| ATOM | 4080 | HD23 | LEU | 294 | 35.375 | 61.598 | 11.867 |
| ATOM | 4081 | C    | LEU | 294 | 33.156 | 57.884 | 14.382 |
| ATOM | 4082 | O    | LEU | 294 | 33.172 | 56.934 | 13.600 |
| ATOM | 4083 | N    | LEU | 295 | 33.622 | 57.768 | 15.634 |
| ATOM | 4084 | H    | LEU | 295 | 33.577 | 58.456 | 16.213 |
| ATOM | 4085 | CA   | LEU | 295 | 34.199 | 56.524 | 16.045 |
| ATOM | 4086 | HA   | LEU | 295 | 35.015 | 56.256 | 15.374 |
| ATOM | 4087 | CB   | LEU | 295 | 34.751 | 56.633 | 17.468 |
| ATOM | 4088 | HB2  | LEU | 295 | 33.920 | 57.044 | 18.042 |
| ATOM | 4089 | HB3  | LEU | 295 | 34.973 | 55.626 | 17.821 |
| ATOM | 4090 | CG   | LEU | 295 | 35.984 | 57.520 | 17.650 |
| ATOM | 4091 | HG   | LEU | 295 | 35.783 | 58.498 | 17.212 |
| ATOM | 4092 | CD1  | LEU | 295 | 36.315 | 57.684 | 19.126 |

|      |      |      |     |     |        |        |        |
|------|------|------|-----|-----|--------|--------|--------|
| ATOM | 4093 | HD11 | LEU | 295 | 36.517 | 56.707 | 19.564 |
| ATOM | 4094 | HD12 | LEU | 295 | 37.195 | 58.318 | 19.233 |
| ATOM | 4095 | HD13 | LEU | 295 | 35.471 | 58.145 | 19.639 |
| ATOM | 4096 | CD2  | LEU | 295 | 37.176 | 56.943 | 16.902 |
| ATOM | 4097 | HD21 | LEU | 295 | 36.942 | 56.879 | 15.839 |
| ATOM | 4098 | HD22 | LEU | 295 | 38.042 | 57.589 | 17.044 |
| ATOM | 4099 | HD23 | LEU | 295 | 37.399 | 55.947 | 17.285 |
| ATOM | 4100 | C    | LEU | 295 | 33.169 | 55.444 | 15.951 |
| ATOM | 4101 | O    | LEU | 295 | 33.450 | 54.374 | 15.435 |
| ATOM | 4102 | N    | ALA | 296 | 31.930 | 55.670 | 16.406 |
| ATOM | 4103 | H    | ALA | 296 | 31.677 | 56.472 | 16.726 |
| ATOM | 4104 | CA   | ALA | 296 | 30.993 | 54.582 | 16.372 |
| ATOM | 4105 | HA   | ALA | 296 | 31.404 | 53.727 | 16.908 |
| ATOM | 4106 | CB   | ALA | 296 | 29.685 | 54.988 | 17.034 |
| ATOM | 4107 | HB1  | ALA | 296 | 29.257 | 55.838 | 16.503 |
| ATOM | 4108 | HB2  | ALA | 296 | 28.987 | 54.152 | 17.003 |
| ATOM | 4109 | HB3  | ALA | 296 | 29.873 | 55.266 | 18.071 |
| ATOM | 4110 | C    | ALA | 296 | 30.758 | 54.149 | 14.956 |
| ATOM | 4111 | O    | ALA | 296 | 30.703 | 52.955 | 14.664 |
| ATOM | 4112 | N    | THR | 297 | 30.633 | 55.115 | 14.031 |
| ATOM | 4113 | H    | THR | 297 | 30.758 | 55.970 | 14.283 |
| ATOM | 4114 | CA   | THR | 297 | 30.309 | 54.810 | 12.668 |
| ATOM | 4115 | HA   | THR | 297 | 29.391 | 54.223 | 12.643 |
| ATOM | 4116 | CB   | THR | 297 | 30.097 | 56.090 | 11.838 |
| ATOM | 4117 | HB   | THR | 297 | 31.000 | 56.698 | 11.887 |
| ATOM | 4118 | CG2  | THR | 297 | 29.799 | 55.741 | 10.388 |
| ATOM | 4119 | HG21 | THR | 297 | 28.895 | 55.133 | 10.338 |
| ATOM | 4120 | HG22 | THR | 297 | 29.652 | 56.657 | 9.816  |
| ATOM | 4121 | HG23 | THR | 297 | 30.636 | 55.182 | 9.969  |
| ATOM | 4122 | OG1  | THR | 297 | 28.990 | 56.829 | 12.369 |
| ATOM | 4123 | HG1  | THR | 297 | 29.148 | 57.034 | 13.158 |
| ATOM | 4124 | C    | THR | 297 | 31.373 | 53.979 | 12.027 |
| ATOM | 4125 | O    | THR | 297 | 31.050 | 53.031 | 11.313 |
| ATOM | 4126 | N    | GLN | 298 | 32.664 | 54.325 | 12.212 |
| ATOM | 4127 | H    | GLN | 298 | 32.898 | 55.026 | 12.726 |
| ATOM | 4128 | CA   | GLN | 298 | 33.676 | 53.541 | 11.563 |
| ATOM | 4129 | HA   | GLN | 298 | 33.435 | 53.429 | 10.506 |
| ATOM | 4130 | CB   | GLN | 298 | 35.041 | 54.222 | 11.683 |
| ATOM | 4131 | HB2  | GLN | 298 | 34.930 | 55.234 | 11.294 |
| ATOM | 4132 | HB3  | GLN | 298 | 35.286 | 54.266 | 12.744 |
| ATOM | 4133 | CG   | GLN | 298 | 36.157 | 53.512 | 10.935 |
| ATOM | 4134 | HG2  | GLN | 298 | 37.100 | 54.011 | 11.156 |
| ATOM | 4135 | HG3  | GLN | 298 | 36.205 | 52.478 | 11.277 |
| ATOM | 4136 | CD   | GLN | 298 | 35.946 | 53.517 | 9.433  |
| ATOM | 4137 | OE1  | GLN | 298 | 35.784 | 54.573 | 8.823  |
| ATOM | 4138 | NE2  | GLN | 298 | 35.948 | 52.332 | 8.833  |
| ATOM | 4139 | HE21 | GLN | 298 | 35.827 | 52.279 | 7.943  |
| ATOM | 4140 | HE22 | GLN | 298 | 36.071 | 51.583 | 9.317  |
| ATOM | 4141 | C    | GLN | 298 | 33.760 | 52.138 | 12.125 |
| ATOM | 4142 | O    | GLN | 298 | 33.754 | 51.201 | 11.329 |
| ATOM | 4143 | N    | PRO | 299 | 33.820 | 51.882 | 13.411 |
| ATOM | 4144 | CD   | PRO | 299 | 34.191 | 52.778 | 14.557 |

|      |      |      |     |     |        |        |        |
|------|------|------|-----|-----|--------|--------|--------|
| ATOM | 4145 | HD2  | PRO | 299 | 33.315 | 53.312 | 14.926 |
| ATOM | 4146 | HD3  | PRO | 299 | 34.952 | 53.496 | 14.252 |
| ATOM | 4147 | CG   | PRO | 299 | 34.714 | 51.775 | 15.546 |
| ATOM | 4148 | HG2  | PRO | 299 | 34.555 | 52.147 | 16.558 |
| ATOM | 4149 | HG3  | PRO | 299 | 35.780 | 51.622 | 15.379 |
| ATOM | 4150 | CB   | PRO | 299 | 33.951 | 50.516 | 15.302 |
| ATOM | 4151 | HB2  | PRO | 299 | 33.000 | 50.483 | 15.834 |
| ATOM | 4152 | HB3  | PRO | 299 | 34.556 | 49.655 | 15.586 |
| ATOM | 4153 | CA   | PRO | 299 | 33.703 | 50.505 | 13.792 |
| ATOM | 4154 | HA   | PRO | 299 | 34.493 | 49.980 | 13.256 |
| ATOM | 4155 | C    | PRO | 299 | 32.393 | 49.844 | 13.518 |
| ATOM | 4156 | O    | PRO | 299 | 32.351 | 48.616 | 13.518 |
| ATOM | 4157 | N    | LEU | 300 | 31.309 | 50.601 | 13.298 |
| ATOM | 4158 | H    | LEU | 300 | 31.355 | 51.499 | 13.331 |
| ATOM | 4159 | CA   | LEU | 300 | 30.062 | 49.957 | 13.007 |
| ATOM | 4160 | HA   | LEU | 300 | 29.819 | 49.249 | 13.799 |
| ATOM | 4161 | CB   | LEU | 300 | 28.936 | 50.988 | 12.910 |
| ATOM | 4162 | HB2  | LEU | 300 | 29.320 | 51.732 | 12.212 |
| ATOM | 4163 | HB3  | LEU | 300 | 28.067 | 50.497 | 12.473 |
| ATOM | 4164 | CG   | LEU | 300 | 28.531 | 51.675 | 14.216 |
| ATOM | 4165 | HG   | LEU | 300 | 29.423 | 52.085 | 14.690 |
| ATOM | 4166 | CD1  | LEU | 300 | 27.538 | 52.796 | 13.949 |
| ATOM | 4167 | HD11 | LEU | 300 | 26.646 | 52.387 | 13.476 |
| ATOM | 4168 | HD12 | LEU | 300 | 27.263 | 53.271 | 14.891 |
| ATOM | 4169 | HD13 | LEU | 300 | 27.992 | 53.535 | 13.289 |
| ATOM | 4170 | CD2  | LEU | 300 | 27.941 | 50.668 | 15.192 |
| ATOM | 4171 | HD21 | LEU | 300 | 28.681 | 49.899 | 15.413 |
| ATOM | 4172 | HD22 | LEU | 300 | 27.660 | 51.177 | 16.114 |
| ATOM | 4173 | HD23 | LEU | 300 | 27.059 | 50.206 | 14.749 |
| ATOM | 4174 | C    | LEU | 300 | 30.241 | 49.195 | 11.728 |
| ATOM | 4175 | O    | LEU | 300 | 29.756 | 48.073 | 11.592 |
| ATOM | 4176 | N    | VAL | 301 | 30.933 | 49.803 | 10.741 |
| ATOM | 4177 | H    | VAL | 301 | 31.263 | 50.629 | 10.881 |
| ATOM | 4178 | CA   | VAL | 301 | 31.145 | 49.149 | 9.481  |
| ATOM | 4179 | HA   | VAL | 301 | 30.222 | 48.718 | 9.093  |
| ATOM | 4180 | CB   | VAL | 301 | 31.714 | 50.120 | 8.430  |
| ATOM | 4181 | HB   | VAL | 301 | 32.596 | 50.611 | 8.841  |
| ATOM | 4182 | CG1  | VAL | 301 | 32.096 | 49.370 | 7.163  |
| ATOM | 4183 | HG11 | VAL | 301 | 31.214 | 48.880 | 6.751  |
| ATOM | 4184 | HG12 | VAL | 301 | 32.496 | 50.072 | 6.431  |
| ATOM | 4185 | HG13 | VAL | 301 | 32.852 | 48.620 | 7.398  |
| ATOM | 4186 | CG2  | VAL | 301 | 30.709 | 51.219 | 8.120  |
| ATOM | 4187 | HG21 | VAL | 301 | 30.485 | 51.775 | 9.031  |
| ATOM | 4188 | HG22 | VAL | 301 | 31.128 | 51.896 | 7.375  |
| ATOM | 4189 | HG23 | VAL | 301 | 29.792 | 50.775 | 7.732  |
| ATOM | 4190 | C    | VAL | 301 | 32.062 | 47.976 | 9.657  |
| ATOM | 4191 | O    | VAL | 301 | 31.837 | 46.911 | 9.087  |
| ATOM | 4192 | N    | TRP | 302 | 33.123 | 48.132 | 10.471 |
| ATOM | 4193 | H    | TRP | 302 | 33.218 | 48.904 | 10.924 |
| ATOM | 4194 | CA   | TRP | 302 | 34.095 | 47.087 | 10.621 |
| ATOM | 4195 | HA   | TRP | 302 | 34.473 | 46.791 | 9.642  |
| ATOM | 4196 | CB   | TRP | 302 | 35.270 | 47.567 | 11.475 |



|      |      |      |     |     |        |        |        |
|------|------|------|-----|-----|--------|--------|--------|
| ATOM | 4197 | HB2  | TRP | 302 | 34.904 | 48.086 | 12.361 |
| ATOM | 4198 | HB3  | TRP | 302 | 35.885 | 46.720 | 11.779 |
| ATOM | 4199 | CG   | TRP | 302 | 36.178 | 48.522 | 10.763 |
| ATOM | 4200 | CD1  | TRP | 302 | 36.376 | 49.840 | 11.059 |
| ATOM | 4201 | HD1  | TRP | 302 | 35.816 | 50.244 | 11.902 |
| ATOM | 4202 | NE1  | TRP | 302 | 37.282 | 50.392 | 10.185 |
| ATOM | 4203 | HE1  | TRP | 302 | 37.569 | 51.284 | 10.199 |
| ATOM | 4204 | CE2  | TRP | 302 | 37.687 | 49.423 | 9.301  |
| ATOM | 4205 | CZ2  | TRP | 302 | 38.588 | 49.498 | 8.240  |
| ATOM | 4206 | HZ2  | TRP | 302 | 39.074 | 50.452 | 8.039  |
| ATOM | 4207 | CH2  | TRP | 302 | 38.806 | 48.361 | 7.514  |
| ATOM | 4208 | HH2  | TRP | 302 | 39.504 | 48.380 | 6.677  |
| ATOM | 4209 | CZ3  | TRP | 302 | 38.150 | 47.165 | 7.823  |
| ATOM | 4210 | HZ3  | TRP | 302 | 38.332 | 46.264 | 7.237  |
| ATOM | 4211 | CE3  | TRP | 302 | 37.256 | 47.086 | 8.874  |
| ATOM | 4212 | HE3  | TRP | 302 | 36.773 | 46.129 | 9.073  |
| ATOM | 4213 | CD2  | TRP | 302 | 37.013 | 48.234 | 9.634  |
| ATOM | 4214 | C    | TRP | 302 | 33.428 | 45.893 | 11.233 |
| ATOM | 4215 | O    | TRP | 302 | 33.695 | 44.755 | 10.849 |
| ATOM | 4216 | N    | VAL | 303 | 32.537 | 46.130 | 12.211 |
| ATOM | 4217 | H    | VAL | 303 | 32.364 | 46.987 | 12.422 |
| ATOM | 4218 | CA   | VAL | 303 | 31.870 | 45.069 | 12.911 |
| ATOM | 4219 | HA   | VAL | 303 | 32.580 | 44.347 | 13.314 |
| ATOM | 4220 | CB   | VAL | 303 | 31.008 | 45.610 | 14.067 |
| ATOM | 4221 | HB   | VAL | 303 | 30.365 | 46.404 | 13.688 |
| ATOM | 4222 | CG1  | VAL | 303 | 30.150 | 44.500 | 14.656 |
| ATOM | 4223 | HG11 | VAL | 303 | 30.793 | 43.706 | 15.035 |
| ATOM | 4224 | HG12 | VAL | 303 | 29.547 | 44.900 | 15.472 |
| ATOM | 4225 | HG13 | VAL | 303 | 29.494 | 44.098 | 13.884 |
| ATOM | 4226 | CG2  | VAL | 303 | 31.886 | 46.236 | 15.139 |
| ATOM | 4227 | HG21 | VAL | 303 | 32.456 | 47.059 | 14.708 |
| ATOM | 4228 | HG22 | VAL | 303 | 31.260 | 46.613 | 15.948 |
| ATOM | 4229 | HG23 | VAL | 303 | 32.572 | 45.486 | 15.531 |
| ATOM | 4230 | C    | VAL | 303 | 31.025 | 44.270 | 11.967 |
| ATOM | 4231 | O    | VAL | 303 | 30.987 | 43.044 | 12.053 |
| ATOM | 4232 | N    | SER | 304 | 30.314 | 44.940 | 11.042 |
| ATOM | 4233 | H    | SER | 304 | 30.388 | 45.836 | 10.997 |
| ATOM | 4234 | CA   | SER | 304 | 29.446 | 44.245 | 10.134 |
| ATOM | 4235 | HA   | SER | 304 | 28.746 | 43.625 | 10.694 |
| ATOM | 4236 | CB   | SER | 304 | 28.649 | 45.240 | 9.287  |
| ATOM | 4237 | HB2  | SER | 304 | 28.064 | 45.875 | 9.952  |
| ATOM | 4238 | HB3  | SER | 304 | 29.348 | 45.855 | 8.721  |
| ATOM | 4239 | OG   | SER | 304 | 27.781 | 44.567 | 8.392  |
| ATOM | 4240 | HG   | SER | 304 | 27.249 | 44.099 | 8.824  |
| ATOM | 4241 | C    | SER | 304 | 30.264 | 43.337 | 9.273  |
| ATOM | 4242 | O    | SER | 304 | 29.838 | 42.223 | 8.970  |
| ATOM | 4243 | N    | LEU | 305 | 31.462 | 43.790 | 8.848  |
| ATOM | 4244 | H    | LEU | 305 | 31.746 | 44.607 | 9.096  |
| ATOM | 4245 | CA   | LEU | 305 | 32.283 | 42.972 | 8.002  |
| ATOM | 4246 | HA   | LEU | 305 | 31.719 | 42.672 | 7.119  |
| ATOM | 4247 | CB   | LEU | 305 | 33.524 | 43.745 | 7.550  |
| ATOM | 4248 | HB2  | LEU | 305 | 33.119 | 44.587 | 6.988  |

|      |      |      |     |     |        |        |        |
|------|------|------|-----|-----|--------|--------|--------|
| ATOM | 4249 | HB3  | LEU | 305 | 34.033 | 44.115 | 8.440  |
| ATOM | 4250 | CG   | LEU | 305 | 34.518 | 42.979 | 6.675  |
| ATOM | 4251 | HG   | LEU | 305 | 34.866 | 42.102 | 7.221  |
| ATOM | 4252 | CD1  | LEU | 305 | 33.862 | 42.539 | 5.375  |
| ATOM | 4253 | HD11 | LEU | 305 | 33.514 | 43.415 | 4.828  |
| ATOM | 4254 | HD12 | LEU | 305 | 34.586 | 41.996 | 4.768  |
| ATOM | 4255 | HD13 | LEU | 305 | 33.015 | 41.890 | 5.596  |
| ATOM | 4256 | CD2  | LEU | 305 | 35.746 | 43.829 | 6.386  |
| ATOM | 4257 | HD21 | LEU | 305 | 36.234 | 44.094 | 7.324  |
| ATOM | 4258 | HD22 | LEU | 305 | 36.440 | 43.265 | 5.762  |
| ATOM | 4259 | HD23 | LEU | 305 | 35.445 | 44.738 | 5.864  |
| ATOM | 4260 | C    | LEU | 305 | 32.639 | 41.746 | 8.771  |
| ATOM | 4261 | O    | LEU | 305 | 32.471 | 40.627 | 8.290  |
| ATOM | 4262 | N    | ALA | 306 | 33.139 | 41.921 | 10.007 |
| ATOM | 4263 | H    | ALA | 306 | 33.301 | 42.741 | 10.341 |
| ATOM | 4264 | CA   | ALA | 306 | 33.413 | 40.762 | 10.794 |
| ATOM | 4265 | HA   | ALA | 306 | 32.647 | 39.997 | 10.667 |
| ATOM | 4266 | CB   | ALA | 306 | 34.760 | 40.168 | 10.412 |
| ATOM | 4267 | HB1  | ALA | 306 | 35.539 | 40.919 | 10.543 |
| ATOM | 4268 | HB2  | ALA | 306 | 34.973 | 39.310 | 11.049 |
| ATOM | 4269 | HB3  | ALA | 306 | 34.735 | 39.849 | 9.370  |
| ATOM | 4270 | C    | ALA | 306 | 33.367 | 41.176 | 12.223 |
| ATOM | 4271 | O    | ALA | 306 | 33.873 | 42.234 | 12.597 |
| ATOM | 4272 | N    | SER | 307 | 32.734 | 40.343 | 13.065 |
| ATOM | 4273 | H    | SER | 307 | 32.327 | 39.604 | 12.752 |
| ATOM | 4274 | CA   | SER | 307 | 32.709 | 40.634 | 14.463 |
| ATOM | 4275 | HA   | SER | 307 | 32.711 | 41.713 | 14.616 |
| ATOM | 4276 | CB   | SER | 307 | 31.451 | 40.051 | 15.109 |
| ATOM | 4277 | HB2  | SER | 307 | 31.377 | 40.426 | 16.130 |
| ATOM | 4278 | HB3  | SER | 307 | 30.582 | 40.378 | 14.539 |
| ATOM | 4279 | OG   | SER | 307 | 31.497 | 38.635 | 15.128 |
| ATOM | 4280 | HG   | SER | 307 | 32.159 | 38.386 | 15.562 |
| ATOM | 4281 | C    | SER | 307 | 33.978 | 40.045 | 14.980 |
| ATOM | 4282 | O    | SER | 307 | 34.742 | 39.466 | 14.217 |
| ATOM | 4283 | N    | GLY | 308 | 34.289 | 40.227 | 16.271 |
| ATOM | 4284 | H    | GLY | 308 | 33.782 | 40.751 | 16.799 |
| ATOM | 4285 | CA   | GLY | 308 | 35.444 | 39.575 | 16.807 |
| ATOM | 4286 | HA2  | GLY | 308 | 35.396 | 39.603 | 17.896 |
| ATOM | 4287 | HA3  | GLY | 308 | 35.455 | 38.538 | 16.471 |
| ATOM | 4288 | C    | GLY | 308 | 36.705 | 40.247 | 16.357 |
| ATOM | 4289 | O    | GLY | 308 | 37.793 | 39.749 | 16.639 |
| ATOM | 4290 | N    | PHE | 309 | 36.629 | 41.394 | 15.655 |
| ATOM | 4291 | H    | PHE | 309 | 35.856 | 41.786 | 15.413 |
| ATOM | 4292 | CA   | PHE | 309 | 37.882 | 41.994 | 15.292 |
| ATOM | 4293 | HA   | PHE | 309 | 38.620 | 41.217 | 15.093 |
| ATOM | 4294 | CB   | PHE | 309 | 37.722 | 42.850 | 14.034 |
| ATOM | 4295 | HB2  | PHE | 309 | 36.865 | 43.515 | 14.139 |
| ATOM | 4296 | HB3  | PHE | 309 | 38.622 | 43.442 | 13.867 |
| ATOM | 4297 | CG   | PHE | 309 | 37.495 | 42.051 | 12.782 |
| ATOM | 4298 | CD1  | PHE | 309 | 37.238 | 40.693 | 12.848 |
| ATOM | 4299 | HD1  | PHE | 309 | 37.200 | 40.203 | 13.821 |
| ATOM | 4300 | CE1  | PHE | 309 | 37.030 | 39.958 | 11.696 |

|      |      |      |     |     |        |        |        |
|------|------|------|-----|-----|--------|--------|--------|
| ATOM | 4301 | HE1  | PHE | 309 | 36.830 | 38.889 | 11.761 |
| ATOM | 4302 | CZ   | PHE | 309 | 37.076 | 40.578 | 10.462 |
| ATOM | 4303 | HZ   | PHE | 309 | 36.912 | 40.003 | 9.550  |
| ATOM | 4304 | CE2  | PHE | 309 | 37.329 | 41.923 | 10.388 |
| ATOM | 4305 | HE2  | PHE | 309 | 37.365 | 42.413 | 9.415  |
| ATOM | 4306 | CD2  | PHE | 309 | 37.538 | 42.658 | 11.540 |
| ATOM | 4307 | HD2  | PHE | 309 | 37.739 | 43.727 | 11.475 |
| ATOM | 4308 | C    | PHE | 309 | 38.371 | 42.801 | 16.437 |
| ATOM | 4309 | O    | PHE | 309 | 37.595 | 43.514 | 17.066 |
| ATOM | 4310 | N    | SER | 310 | 39.684 | 42.677 | 16.743 |
| ATOM | 4311 | H    | SER | 310 | 40.202 | 42.143 | 16.237 |
| ATOM | 4312 | CA   | SER | 310 | 40.251 | 43.381 | 17.855 |
| ATOM | 4313 | HA   | SER | 310 | 39.616 | 43.258 | 18.732 |
| ATOM | 4314 | CB   | SER | 310 | 41.644 | 42.837 | 18.180 |
| ATOM | 4315 | HB2  | SER | 310 | 42.259 | 42.894 | 17.282 |
| ATOM | 4316 | HB3  | SER | 310 | 42.086 | 43.454 | 18.963 |
| ATOM | 4317 | OG   | SER | 310 | 41.576 | 41.492 | 18.621 |
| ATOM | 4318 | HG   | SER | 310 | 41.239 | 41.023 | 18.025 |
| ATOM | 4319 | C    | SER | 310 | 40.276 | 44.819 | 17.479 |
| ATOM | 4320 | O    | SER | 310 | 41.254 | 45.338 | 16.942 |
| ATOM | 4321 | N    | LEU | 311 | 39.151 | 45.480 | 17.775 |
| ATOM | 4322 | H    | LEU | 311 | 38.542 | 44.963 | 18.191 |
| ATOM | 4323 | CA   | LEU | 311 | 38.858 | 46.847 | 17.503 |
| ATOM | 4324 | HA   | LEU | 311 | 39.699 | 47.472 | 17.804 |
| ATOM | 4325 | CB   | LEU | 311 | 38.606 | 47.054 | 16.008 |
| ATOM | 4326 | HB2  | LEU | 311 | 37.782 | 46.377 | 15.784 |
| ATOM | 4327 | HB3  | LEU | 311 | 38.280 | 48.084 | 15.861 |
| ATOM | 4328 | CG   | LEU | 311 | 39.780 | 46.753 | 15.075 |
| ATOM | 4329 | HG   | LEU | 311 | 40.135 | 45.741 | 15.270 |
| ATOM | 4330 | CD1  | LEU | 311 | 39.353 | 46.869 | 13.619 |
| ATOM | 4331 | HD11 | LEU | 311 | 38.998 | 47.881 | 13.423 |
| ATOM | 4332 | HD12 | LEU | 311 | 40.203 | 46.651 | 12.972 |
| ATOM | 4333 | HD13 | LEU | 311 | 38.552 | 46.158 | 13.417 |
| ATOM | 4334 | CD2  | LEU | 311 | 40.946 | 47.687 | 15.360 |
| ATOM | 4335 | HD21 | LEU | 311 | 41.273 | 47.556 | 16.391 |
| ATOM | 4336 | HD22 | LEU | 311 | 41.770 | 47.456 | 14.685 |
| ATOM | 4337 | HD23 | LEU | 311 | 40.631 | 48.719 | 15.208 |
| ATOM | 4338 | C    | LEU | 311 | 37.673 | 47.081 | 18.381 |
| ATOM | 4339 | O    | LEU | 311 | 37.510 | 46.388 | 19.384 |
| ATOM | 4340 | N    | PRO | 312 | 36.835 | 48.026 | 18.069 |
| ATOM | 4341 | CD   | PRO | 312 | 37.085 | 49.221 | 17.196 |
| ATOM | 4342 | HD2  | PRO | 312 | 36.811 | 49.008 | 16.163 |
| ATOM | 4343 | HD3  | PRO | 312 | 38.133 | 49.519 | 17.240 |
| ATOM | 4344 | CG   | PRO | 312 | 36.175 | 50.230 | 17.838 |
| ATOM | 4345 | HG2  | PRO | 312 | 35.859 | 50.960 | 17.092 |
| ATOM | 4346 | HG3  | PRO | 312 | 36.707 | 50.739 | 18.641 |
| ATOM | 4347 | CB   | PRO | 312 | 35.014 | 49.460 | 18.373 |
| ATOM | 4348 | HB2  | PRO | 312 | 34.316 | 49.299 | 17.551 |
| ATOM | 4349 | HB3  | PRO | 312 | 34.491 | 49.928 | 19.207 |
| ATOM | 4350 | CA   | PRO | 312 | 35.613 | 48.124 | 18.816 |
| ATOM | 4351 | HA   | PRO | 312 | 35.842 | 48.112 | 19.882 |
| ATOM | 4352 | C    | PRO | 312 | 34.715 | 46.970 | 18.486 |

|      |      |      |     |     |        |        |        |
|------|------|------|-----|-----|--------|--------|--------|
| ATOM | 4353 | O    | PRO | 312 | 33.608 | 46.909 | 19.019 |
| ATOM | 4354 | N    | VAL | 313 | 35.174 | 46.038 | 17.626 |
| ATOM | 4355 | H    | VAL | 313 | 36.026 | 46.113 | 17.345 |
| ATOM | 4356 | CA   | VAL | 313 | 34.362 | 44.962 | 17.162 |
| ATOM | 4357 | HA   | VAL | 313 | 33.452 | 45.324 | 16.684 |
| ATOM | 4358 | CB   | VAL | 313 | 35.122 | 44.072 | 16.162 |
| ATOM | 4359 | HB   | VAL | 313 | 36.076 | 43.781 | 16.601 |
| ATOM | 4360 | CG1  | VAL | 313 | 34.313 | 42.826 | 15.835 |
| ATOM | 4361 | HG11 | VAL | 313 | 33.359 | 43.117 | 15.395 |
| ATOM | 4362 | HG12 | VAL | 313 | 34.866 | 42.209 | 15.127 |
| ATOM | 4363 | HG13 | VAL | 313 | 34.134 | 42.258 | 16.748 |
| ATOM | 4364 | CG2  | VAL | 313 | 35.446 | 44.849 | 14.895 |
| ATOM | 4365 | HG21 | VAL | 313 | 36.067 | 45.710 | 15.145 |
| ATOM | 4366 | HG22 | VAL | 313 | 35.983 | 44.204 | 14.200 |
| ATOM | 4367 | HG23 | VAL | 313 | 34.521 | 45.191 | 14.431 |
| ATOM | 4368 | C    | VAL | 313 | 33.879 | 44.148 | 18.325 |
| ATOM | 4369 | O    | VAL | 313 | 32.779 | 43.603 | 18.243 |
| ATOM | 4370 | N    | PRO | 314 | 34.603 | 44.009 | 19.406 |
| ATOM | 4371 | CD   | PRO | 314 | 36.052 | 44.382 | 19.635 |
| ATOM | 4372 | HD2  | PRO | 314 | 36.140 | 45.431 | 19.919 |
| ATOM | 4373 | HD3  | PRO | 314 | 36.644 | 44.198 | 18.738 |
| ATOM | 4374 | CG   | PRO | 314 | 36.407 | 43.448 | 20.757 |
| ATOM | 4375 | HG2  | PRO | 314 | 37.193 | 43.895 | 21.366 |
| ATOM | 4376 | HG3  | PRO | 314 | 36.761 | 42.503 | 20.344 |
| ATOM | 4377 | CB   | PRO | 314 | 35.155 | 43.250 | 21.544 |
| ATOM | 4378 | HB2  | PRO | 314 | 35.080 | 44.126 | 22.189 |
| ATOM | 4379 | HB3  | PRO | 314 | 35.077 | 42.346 | 22.148 |
| ATOM | 4380 | CA   | PRO | 314 | 34.038 | 43.277 | 20.499 |
| ATOM | 4381 | HA   | PRO | 314 | 33.748 | 42.275 | 20.182 |
| ATOM | 4382 | C    | PRO | 314 | 32.828 | 44.025 | 20.952 |
| ATOM | 4383 | O    | PRO | 314 | 32.802 | 45.248 | 20.827 |
| ATOM | 4384 | N    | TRP | 315 | 31.818 | 43.309 | 21.473 |
| ATOM | 4385 | H    | TRP | 315 | 31.946 | 42.429 | 21.611 |
| ATOM | 4386 | CA   | TRP | 315 | 30.561 | 43.912 | 21.807 |
| ATOM | 4387 | HA   | TRP | 315 | 30.140 | 44.399 | 20.928 |
| ATOM | 4388 | CB   | TRP | 315 | 29.573 | 42.853 | 22.299 |
| ATOM | 4389 | HB2  | TRP | 315 | 29.411 | 42.102 | 21.526 |
| ATOM | 4390 | HB3  | TRP | 315 | 29.955 | 42.371 | 23.199 |
| ATOM | 4391 | CG   | TRP | 315 | 28.225 | 43.406 | 22.648 |
| ATOM | 4392 | CD1  | TRP | 315 | 27.167 | 43.580 | 21.804 |
| ATOM | 4393 | HD1  | TRP | 315 | 27.314 | 43.286 | 20.765 |
| ATOM | 4394 | NE1  | TRP | 315 | 26.099 | 44.113 | 22.485 |
| ATOM | 4395 | HE1  | TRP | 315 | 25.266 | 44.317 | 22.107 |
| ATOM | 4396 | CE2  | TRP | 315 | 26.459 | 44.293 | 23.798 |
| ATOM | 4397 | CZ2  | TRP | 315 | 25.724 | 44.800 | 24.868 |
| ATOM | 4398 | HZ2  | TRP | 315 | 24.697 | 45.118 | 24.687 |
| ATOM | 4399 | CH2  | TRP | 315 | 26.341 | 44.867 | 26.085 |
| ATOM | 4400 | HH2  | TRP | 315 | 25.799 | 45.257 | 26.947 |
| ATOM | 4401 | CZ3  | TRP | 315 | 27.664 | 44.442 | 26.251 |
| ATOM | 4402 | HZ3  | TRP | 315 | 28.147 | 44.500 | 27.226 |
| ATOM | 4403 | CE3  | TRP | 315 | 28.397 | 43.939 | 25.193 |
| ATOM | 4404 | HE3  | TRP | 315 | 29.424 | 43.622 | 25.377 |

|      |      |      |     |     |        |        |        |
|------|------|------|-----|-----|--------|--------|--------|
| ATOM | 4405 | CD2  | TRP | 315 | 27.790 | 43.859 | 23.937 |
| ATOM | 4406 | C    | TRP | 315 | 30.755 | 44.968 | 22.841 |
| ATOM | 4407 | O    | TRP | 315 | 30.206 | 46.063 | 22.723 |
| ATOM | 4408 | N    | GLY | 316 | 31.555 | 44.682 | 23.881 |
| ATOM | 4409 | H    | GLY | 316 | 32.001 | 43.901 | 23.925 |
| ATOM | 4410 | CA   | GLY | 316 | 31.692 | 45.645 | 24.931 |
| ATOM | 4411 | HA2  | GLY | 316 | 30.717 | 45.863 | 25.367 |
| ATOM | 4412 | HA3  | GLY | 316 | 32.358 | 45.262 | 25.704 |
| ATOM | 4413 | C    | GLY | 316 | 32.268 | 46.905 | 24.373 |
| ATOM | 4414 | O    | GLY | 316 | 31.827 | 48.000 | 24.719 |
| ATOM | 4415 | N    | VAL | 317 | 33.283 | 46.785 | 23.498 |
| ATOM | 4416 | H    | VAL | 317 | 33.562 | 45.969 | 23.241 |
| ATOM | 4417 | CA   | VAL | 317 | 33.920 | 47.958 | 22.975 |
| ATOM | 4418 | HA   | VAL | 317 | 34.183 | 48.658 | 23.768 |
| ATOM | 4419 | CB   | VAL | 317 | 35.195 | 47.604 | 22.188 |
| ATOM | 4420 | HB   | VAL | 317 | 34.952 | 46.848 | 21.442 |
| ATOM | 4421 | CG1  | VAL | 317 | 35.754 | 48.838 | 21.496 |
| ATOM | 4422 | HG11 | VAL | 317 | 35.997 | 49.595 | 22.242 |
| ATOM | 4423 | HG12 | VAL | 317 | 36.655 | 48.569 | 20.945 |
| ATOM | 4424 | HG13 | VAL | 317 | 35.011 | 49.236 | 20.805 |
| ATOM | 4425 | CG2  | VAL | 317 | 36.237 | 46.988 | 23.110 |
| ATOM | 4426 | HG21 | VAL | 317 | 35.835 | 46.080 | 23.558 |
| ATOM | 4427 | HG22 | VAL | 317 | 37.131 | 46.744 | 22.537 |
| ATOM | 4428 | HG23 | VAL | 317 | 36.493 | 47.698 | 23.896 |
| ATOM | 4429 | C    | VAL | 317 | 32.952 | 48.704 | 22.109 |
| ATOM | 4430 | O    | VAL | 317 | 32.911 | 49.932 | 22.133 |
| ATOM | 4431 | N    | GLN | 318 | 32.137 | 47.977 | 21.323 |
| ATOM | 4432 | H    | GLN | 318 | 32.169 | 47.078 | 21.349 |
| ATOM | 4433 | CA   | GLN | 318 | 31.218 | 48.636 | 20.445 |
| ATOM | 4434 | HA   | GLN | 318 | 31.760 | 49.310 | 19.781 |
| ATOM | 4435 | CB   | GLN | 318 | 30.463 | 47.613 | 19.593 |
| ATOM | 4436 | HB2  | GLN | 318 | 31.211 | 46.996 | 19.095 |
| ATOM | 4437 | HB3  | GLN | 318 | 29.879 | 46.995 | 20.275 |
| ATOM | 4438 | CG   | GLN | 318 | 29.542 | 48.230 | 18.554 |
| ATOM | 4439 | HG2  | GLN | 318 | 28.981 | 47.433 | 18.066 |
| ATOM | 4440 | HG3  | GLN | 318 | 28.850 | 48.906 | 19.056 |
| ATOM | 4441 | CD   | GLN | 318 | 30.297 | 49.009 | 17.495 |
| ATOM | 4442 | OE1  | GLN | 318 | 31.208 | 48.484 | 16.856 |
| ATOM | 4443 | NE2  | GLN | 318 | 29.919 | 50.268 | 17.307 |
| ATOM | 4444 | HE21 | GLN | 318 | 30.334 | 50.775 | 16.690 |
| ATOM | 4445 | HE22 | GLN | 318 | 29.247 | 50.614 | 17.795 |
| ATOM | 4446 | C    | GLN | 318 | 30.288 | 49.455 | 21.281 |
| ATOM | 4447 | O    | GLN | 318 | 29.939 | 50.579 | 20.921 |
| ATOM | 4448 | N    | ALA | 319 | 29.870 | 48.907 | 22.435 |
| ATOM | 4449 | H    | ALA | 319 | 30.154 | 48.082 | 22.655 |
| ATOM | 4450 | CA   | ALA | 319 | 28.984 | 49.618 | 23.311 |
| ATOM | 4451 | HA   | ALA | 319 | 28.086 | 49.938 | 22.783 |
| ATOM | 4452 | CB   | ALA | 319 | 28.572 | 48.735 | 24.479 |
| ATOM | 4453 | HB1  | ALA | 319 | 29.460 | 48.414 | 25.023 |
| ATOM | 4454 | HB2  | ALA | 319 | 27.920 | 49.297 | 25.148 |
| ATOM | 4455 | HB3  | ALA | 319 | 28.040 | 47.861 | 24.104 |
| ATOM | 4456 | C    | ALA | 319 | 29.679 | 50.859 | 23.776 |

|      |      |     |     |     |        |        |        |
|------|------|-----|-----|-----|--------|--------|--------|
| ATOM | 4457 | O   | ALA | 319 | 29.067 | 51.923 | 23.863 |
| ATOM | 4458 | N   | ALA | 320 | 30.992 | 50.757 | 24.064 |
| ATOM | 4459 | H   | ALA | 320 | 31.405 | 49.970 | 23.921 |
| ATOM | 4460 | CA  | ALA | 320 | 31.730 | 51.870 | 24.589 |
| ATOM | 4461 | HA  | ALA | 320 | 31.271 | 52.226 | 25.511 |
| ATOM | 4462 | CB  | ALA | 320 | 33.165 | 51.462 | 24.886 |
| ATOM | 4463 | HB1 | ALA | 320 | 33.641 | 51.112 | 23.970 |
| ATOM | 4464 | HB2 | ALA | 320 | 33.714 | 52.320 | 25.275 |
| ATOM | 4465 | HB3 | ALA | 320 | 33.170 | 50.662 | 25.626 |
| ATOM | 4466 | C   | ALA | 320 | 31.683 | 52.999 | 23.611 |
| ATOM | 4467 | O   | ALA | 320 | 31.449 | 54.148 | 23.985 |
| ATOM | 4468 | N   | SER | 321 | 31.882 | 52.697 | 22.318 |
| ATOM | 4469 | H   | SER | 321 | 32.017 | 51.840 | 22.078 |
| ATOM | 4470 | CA  | SER | 321 | 31.881 | 53.728 | 21.324 |
| ATOM | 4471 | HA  | SER | 321 | 32.570 | 54.521 | 21.614 |
| ATOM | 4472 | CB  | SER | 321 | 32.323 | 53.168 | 19.970 |
| ATOM | 4473 | HB2 | SER | 321 | 32.420 | 53.994 | 19.265 |
| ATOM | 4474 | HB3 | SER | 321 | 33.290 | 52.680 | 20.093 |
| ATOM | 4475 | OG  | SER | 321 | 31.382 | 52.232 | 19.474 |
| ATOM | 4476 | HG  | SER | 321 | 31.309 | 51.603 | 20.011 |
| ATOM | 4477 | C   | SER | 321 | 30.506 | 54.308 | 21.260 |
| ATOM | 4478 | O   | SER | 321 | 30.332 | 55.495 | 20.991 |
| ATOM | 4479 | N   | TRP | 322 | 29.489 | 53.466 | 21.512 |
| ATOM | 4480 | H   | TRP | 322 | 29.699 | 52.623 | 21.746 |
| ATOM | 4481 | CA  | TRP | 322 | 28.115 | 53.863 | 21.421 |
| ATOM | 4482 | HA  | TRP | 322 | 27.924 | 54.311 | 20.446 |
| ATOM | 4483 | CB  | TRP | 322 | 27.195 | 52.652 | 21.591 |
| ATOM | 4484 | HB2 | TRP | 322 | 27.531 | 52.039 | 22.427 |
| ATOM | 4485 | HB3 | TRP | 322 | 26.171 | 52.979 | 21.770 |
| ATOM | 4486 | CG  | TRP | 322 | 27.155 | 51.756 | 20.391 |
| ATOM | 4487 | CD1 | TRP | 322 | 27.425 | 52.104 | 19.099 |
| ATOM | 4488 | HD1 | TRP | 322 | 27.698 | 53.143 | 18.917 |
| ATOM | 4489 | NE1 | TRP | 322 | 27.284 | 51.014 | 18.275 |
| ATOM | 4490 | HE1 | TRP | 322 | 27.420 | 51.018 | 17.348 |
| ATOM | 4491 | CE2 | TRP | 322 | 26.916 | 49.932 | 19.035 |
| ATOM | 4492 | CZ2 | TRP | 322 | 26.656 | 48.616 | 18.655 |
| ATOM | 4493 | HZ2 | TRP | 322 | 26.745 | 48.353 | 17.601 |
| ATOM | 4494 | CH2 | TRP | 322 | 26.303 | 47.732 | 19.636 |
| ATOM | 4495 | HH2 | TRP | 322 | 26.093 | 46.694 | 19.379 |
| ATOM | 4496 | CZ3 | TRP | 322 | 26.205 | 48.133 | 20.972 |
| ATOM | 4497 | HZ3 | TRP | 322 | 25.922 | 47.419 | 21.746 |
| ATOM | 4498 | CE3 | TRP | 322 | 26.461 | 49.436 | 21.354 |
| ATOM | 4499 | HE3 | TRP | 322 | 26.369 | 49.695 | 22.409 |
| ATOM | 4500 | CD2 | TRP | 322 | 26.825 | 50.362 | 20.372 |
| ATOM | 4501 | C   | TRP | 322 | 27.829 | 54.907 | 22.461 |
| ATOM | 4502 | O   | TRP | 322 | 27.210 | 55.928 | 22.162 |
| ATOM | 4503 | N   | LEU | 323 | 28.275 | 54.688 | 23.717 |
| ATOM | 4504 | H   | LEU | 323 | 28.750 | 53.951 | 23.919 |
| ATOM | 4505 | CA  | LEU | 323 | 27.980 | 55.655 | 24.739 |
| ATOM | 4506 | HA  | LEU | 323 | 26.916 | 55.892 | 24.727 |
| ATOM | 4507 | CB  | LEU | 323 | 28.343 | 55.103 | 26.119 |
| ATOM | 4508 | HB2 | LEU | 323 | 29.377 | 54.776 | 26.007 |

|      |      |      |     |     |        |        |        |
|------|------|------|-----|-----|--------|--------|--------|
| ATOM | 4509 | HB3  | LEU | 323 | 28.298 | 55.925 | 26.834 |
| ATOM | 4510 | CG   | LEU | 323 | 27.493 | 53.938 | 26.628 |
| ATOM | 4511 | HG   | LEU | 323 | 27.490 | 53.149 | 25.876 |
| ATOM | 4512 | CD1  | LEU | 323 | 28.054 | 53.392 | 27.933 |
| ATOM | 4513 | HD11 | LEU | 323 | 28.057 | 54.180 | 28.686 |
| ATOM | 4514 | HD12 | LEU | 323 | 27.434 | 52.564 | 28.277 |
| ATOM | 4515 | HD13 | LEU | 323 | 29.073 | 53.040 | 27.772 |
| ATOM | 4516 | CD2  | LEU | 323 | 26.046 | 54.368 | 26.814 |
| ATOM | 4517 | HD21 | LEU | 323 | 25.642 | 54.708 | 25.860 |
| ATOM | 4518 | HD22 | LEU | 323 | 25.459 | 53.524 | 27.177 |
| ATOM | 4519 | HD23 | LEU | 323 | 25.998 | 55.181 | 27.539 |
| ATOM | 4520 | C    | LEU | 323 | 28.711 | 56.925 | 24.477 |
| ATOM | 4521 | O    | LEU | 323 | 28.274 | 57.992 | 24.905 |
| ATOM | 4522 | N    | LEU | 324 | 29.864 | 56.845 | 23.792 |
| ATOM | 4523 | H    | LEU | 324 | 30.168 | 56.044 | 23.515 |
| ATOM | 4524 | CA   | LEU | 324 | 30.609 | 58.032 | 23.503 |
| ATOM | 4525 | HA   | LEU | 324 | 30.868 | 58.541 | 24.432 |
| ATOM | 4526 | CB   | LEU | 324 | 31.900 | 57.686 | 22.758 |
| ATOM | 4527 | HB2  | LEU | 324 | 31.566 | 57.057 | 21.933 |
| ATOM | 4528 | HB3  | LEU | 324 | 32.320 | 58.611 | 22.362 |
| ATOM | 4529 | CG   | LEU | 324 | 32.969 | 56.945 | 23.564 |
| ATOM | 4530 | HG   | LEU | 324 | 32.517 | 56.069 | 24.029 |
| ATOM | 4531 | CD1  | LEU | 324 | 34.113 | 56.506 | 22.662 |
| ATOM | 4532 | HD11 | LEU | 324 | 34.566 | 57.381 | 22.197 |
| ATOM | 4533 | HD12 | LEU | 324 | 34.862 | 55.981 | 23.254 |
| ATOM | 4534 | HD13 | LEU | 324 | 33.731 | 55.841 | 21.888 |
| ATOM | 4535 | CD2  | LEU | 324 | 33.492 | 57.817 | 24.695 |
| ATOM | 4536 | HD21 | LEU | 324 | 32.670 | 58.081 | 25.361 |
| ATOM | 4537 | HD22 | LEU | 324 | 34.251 | 57.270 | 25.255 |
| ATOM | 4538 | HD23 | LEU | 324 | 33.930 | 58.725 | 24.281 |
| ATOM | 4539 | C    | LEU | 324 | 29.693 | 58.905 | 22.704 |
| ATOM | 4540 | O    | LEU | 324 | 29.658 | 60.116 | 22.911 |
| ATOM | 4541 | N    | CYS | 325 | 28.920 | 58.295 | 21.777 |
| ATOM | 4542 | H    | CYS | 325 | 29.010 | 57.402 | 21.706 |
| ATOM | 4543 | CA   | CYS | 325 | 27.991 | 58.994 | 20.929 |
| ATOM | 4544 | HA   | CYS | 325 | 28.507 | 59.794 | 20.397 |
| ATOM | 4545 | CB   | CYS | 325 | 27.379 | 58.039 | 19.902 |
| ATOM | 4546 | HB2  | CYS | 325 | 27.011 | 57.139 | 20.395 |
| ATOM | 4547 | HB3  | CYS | 325 | 26.558 | 58.526 | 19.375 |
| ATOM | 4548 | SG   | CYS | 325 | 28.530 | 57.477 | 18.626 |
| ATOM | 4549 | HG   | CYS | 325 | 27.656 | 56.714 | 17.976 |
| ATOM | 4550 | C    | CYS | 325 | 26.917 | 59.637 | 21.758 |
| ATOM | 4551 | O    | CYS | 325 | 26.567 | 60.797 | 21.544 |
| ATOM | 4552 | N    | CYS | 326 | 26.381 | 58.899 | 22.746 |
| ATOM | 4553 | H    | CYS | 326 | 26.716 | 58.072 | 22.865 |
| ATOM | 4554 | CA   | CYS | 326 | 25.321 | 59.374 | 23.594 |
| ATOM | 4555 | HA   | CYS | 326 | 24.486 | 59.718 | 22.984 |
| ATOM | 4556 | CB   | CYS | 326 | 24.827 | 58.254 | 24.512 |
| ATOM | 4557 | HB2  | CYS | 326 | 25.668 | 57.786 | 25.023 |
| ATOM | 4558 | HB3  | CYS | 326 | 24.129 | 58.650 | 25.250 |
| ATOM | 4559 | SG   | CYS | 326 | 23.953 | 56.921 | 23.660 |
| ATOM | 4560 | HG   | CYS | 326 | 23.707 | 56.198 | 24.749 |

|      |      |      |     |     |        |        |        |
|------|------|------|-----|-----|--------|--------|--------|
| ATOM | 4561 | C    | CYS | 326 | 25.824 | 60.545 | 24.383 |
| ATOM | 4562 | O    | CYS | 326 | 25.071 | 61.464 | 24.702 |
| ATOM | 4563 | N    | ALA | 327 | 27.131 | 60.533 | 24.702 |
| ATOM | 4564 | H    | ALA | 327 | 27.594 | 59.834 | 24.374 |
| ATOM | 4565 | CA   | ALA | 327 | 27.798 | 61.526 | 25.500 |
| ATOM | 4566 | HA   | ALA | 327 | 27.326 | 61.597 | 26.480 |
| ATOM | 4567 | CB   | ALA | 327 | 29.261 | 61.158 | 25.691 |
| ATOM | 4568 | HB1  | ALA | 327 | 29.750 | 61.092 | 24.719 |
| ATOM | 4569 | HB2  | ALA | 327 | 29.753 | 61.922 | 26.293 |
| ATOM | 4570 | HB3  | ALA | 327 | 29.331 | 60.196 | 26.198 |
| ATOM | 4571 | C    | ALA | 327 | 27.664 | 62.868 | 24.847 |
| ATOM | 4572 | O    | ALA | 327 | 27.632 | 63.891 | 25.529 |
| ATOM | 4573 | N    | LEU | 328 | 27.586 | 62.901 | 23.504 |
| ATOM | 4574 | H    | LEU | 328 | 27.588 | 62.114 | 23.067 |
| ATOM | 4575 | CA   | LEU | 328 | 27.502 | 64.131 | 22.767 |
| ATOM | 4576 | HA   | LEU | 328 | 28.394 | 64.731 | 22.947 |
| ATOM | 4577 | CB   | LEU | 328 | 27.396 | 63.850 | 21.267 |
| ATOM | 4578 | HB2  | LEU | 328 | 28.302 | 63.287 | 21.042 |
| ATOM | 4579 | HB3  | LEU | 328 | 26.525 | 63.216 | 21.103 |
| ATOM | 4580 | CG   | LEU | 328 | 27.316 | 65.074 | 20.352 |
| ATOM | 4581 | HG   | LEU | 328 | 26.434 | 65.656 | 20.619 |
| ATOM | 4582 | CD1  | LEU | 328 | 28.558 | 65.939 | 20.500 |
| ATOM | 4583 | HD11 | LEU | 328 | 29.440 | 65.357 | 20.233 |
| ATOM | 4584 | HD12 | LEU | 328 | 28.480 | 66.803 | 19.841 |
| ATOM | 4585 | HD13 | LEU | 328 | 28.645 | 66.277 | 21.533 |
| ATOM | 4586 | CD2  | LEU | 328 | 27.135 | 64.652 | 18.902 |
| ATOM | 4587 | HD21 | LEU | 328 | 26.214 | 64.078 | 18.802 |
| ATOM | 4588 | HD22 | LEU | 328 | 27.081 | 65.538 | 18.269 |
| ATOM | 4589 | HD23 | LEU | 328 | 27.981 | 64.037 | 18.594 |
| ATOM | 4590 | C    | LEU | 328 | 26.321 | 64.907 | 23.262 |
| ATOM | 4591 | O    | LEU | 328 | 26.360 | 66.135 | 23.310 |
| ATOM | 4592 | N    | SER | 329 | 25.233 | 64.213 | 23.638 |
| ATOM | 4593 | H    | SER | 329 | 25.257 | 63.314 | 23.605 |
| ATOM | 4594 | CA   | SER | 329 | 24.045 | 64.883 | 24.087 |
| ATOM | 4595 | HA   | SER | 329 | 23.686 | 65.559 | 23.311 |
| ATOM | 4596 | CB   | SER | 329 | 22.943 | 63.868 | 24.399 |
| ATOM | 4597 | HB2  | SER | 329 | 23.330 | 63.141 | 25.113 |
| ATOM | 4598 | HB3  | SER | 329 | 22.097 | 64.395 | 24.840 |
| ATOM | 4599 | OG   | SER | 329 | 22.521 | 63.197 | 23.225 |
| ATOM | 4600 | HG   | SER | 329 | 22.226 | 63.751 | 22.681 |
| ATOM | 4601 | C    | SER | 329 | 24.357 | 65.720 | 25.297 |
| ATOM | 4602 | O    | SER | 329 | 23.732 | 66.757 | 25.512 |
| ATOM | 4603 | N    | ALA | 330 | 25.283 | 65.255 | 26.156 |
| ATOM | 4604 | H    | ALA | 330 | 25.645 | 64.455 | 25.960 |
| ATOM | 4605 | CA   | ALA | 330 | 25.703 | 65.966 | 27.339 |
| ATOM | 4606 | HA   | ALA | 330 | 24.808 | 66.291 | 27.870 |
| ATOM | 4607 | CB   | ALA | 330 | 26.504 | 65.050 | 28.251 |
| ATOM | 4608 | HB1  | ALA | 330 | 27.408 | 64.724 | 27.736 |
| ATOM | 4609 | HB2  | ALA | 330 | 26.778 | 65.589 | 29.158 |
| ATOM | 4610 | HB3  | ALA | 330 | 25.902 | 64.180 | 28.513 |
| ATOM | 4611 | C    | ALA | 330 | 26.522 | 67.193 | 27.016 |
| ATOM | 4612 | O    | ALA | 330 | 26.415 | 68.211 | 27.696 |



|      |      |      |     |     |        |        |        |
|------|------|------|-----|-----|--------|--------|--------|
| ATOM | 4613 | N    | LEU | 331 | 27.393 | 67.107 | 25.989 |
| ATOM | 4614 | H    | LEU | 331 | 27.330 | 66.361 | 25.490 |
| ATOM | 4615 | CA   | LEU | 331 | 28.379 | 68.111 | 25.666 |
| ATOM | 4616 | HA   | LEU | 331 | 28.946 | 68.373 | 26.560 |
| ATOM | 4617 | CB   | LEU | 331 | 29.351 | 67.586 | 24.607 |
| ATOM | 4618 | HB2  | LEU | 331 | 28.701 | 67.225 | 23.810 |
| ATOM | 4619 | HB3  | LEU | 331 | 29.939 | 68.428 | 24.242 |
| ATOM | 4620 | CG   | LEU | 331 | 30.290 | 66.461 | 25.047 |
| ATOM | 4621 | HG   | LEU | 331 | 29.698 | 65.659 | 25.487 |
| ATOM | 4622 | CD1  | LEU | 331 | 31.073 | 65.920 | 23.861 |
| ATOM | 4623 | HD11 | LEU | 331 | 31.666 | 66.721 | 23.420 |
| ATOM | 4624 | HD12 | LEU | 331 | 31.735 | 65.121 | 24.196 |
| ATOM | 4625 | HD13 | LEU | 331 | 30.380 | 65.529 | 23.116 |
| ATOM | 4626 | CD2  | LEU | 331 | 31.240 | 66.947 | 26.131 |
| ATOM | 4627 | HD21 | LEU | 331 | 30.666 | 67.284 | 26.994 |
| ATOM | 4628 | HD22 | LEU | 331 | 31.899 | 66.132 | 26.430 |
| ATOM | 4629 | HD23 | LEU | 331 | 31.837 | 67.774 | 25.747 |
| ATOM | 4630 | C    | LEU | 331 | 27.841 | 69.428 | 25.171 |
| ATOM | 4631 | O    | LEU | 331 | 28.371 | 70.477 | 25.535 |
| ATOM | 4632 | N    | ASN | 332 | 26.786 | 69.433 | 24.336 |
| ATOM | 4633 | H    | ASN | 332 | 26.342 | 68.665 | 24.182 |
| ATOM | 4634 | CA   | ASN | 332 | 26.365 | 70.648 | 23.692 |
| ATOM | 4635 | HA   | ASN | 332 | 27.185 | 71.057 | 23.102 |
| ATOM | 4636 | CB   | ASN | 332 | 25.181 | 70.378 | 22.761 |
| ATOM | 4637 | HB2  | ASN | 332 | 24.446 | 69.776 | 23.295 |
| ATOM | 4638 | HB3  | ASN | 332 | 24.733 | 71.330 | 22.477 |
| ATOM | 4639 | CG   | ASN | 332 | 25.588 | 69.639 | 21.501 |
| ATOM | 4640 | OD1  | ASN | 332 | 26.764 | 69.610 | 21.139 |
| ATOM | 4641 | ND2  | ASN | 332 | 24.613 | 69.039 | 20.828 |
| ATOM | 4642 | HD21 | ASN | 332 | 24.800 | 68.586 | 20.073 |
| ATOM | 4643 | HD22 | ASN | 332 | 23.766 | 69.085 | 21.127 |
| ATOM | 4644 | C    | ASN | 332 | 26.006 | 71.724 | 24.670 |
| ATOM | 4645 | O    | ASN | 332 | 26.457 | 72.855 | 24.503 |
| ATOM | 4646 | N    | PRO | 333 | 25.237 | 71.462 | 25.685 |
| ATOM | 4647 | CD   | PRO | 333 | 24.433 | 70.190 | 25.937 |
| ATOM | 4648 | HD2  | PRO | 333 | 25.046 | 69.442 | 26.440 |
| ATOM | 4649 | HD3  | PRO | 333 | 24.058 | 69.781 | 24.999 |
| ATOM | 4650 | CG   | PRO | 333 | 23.331 | 70.717 | 26.813 |
| ATOM | 4651 | HG2  | PRO | 333 | 22.989 | 69.927 | 27.481 |
| ATOM | 4652 | HG3  | PRO | 333 | 22.501 | 71.051 | 26.191 |
| ATOM | 4653 | CB   | PRO | 333 | 23.919 | 71.858 | 27.574 |
| ATOM | 4654 | HB2  | PRO | 333 | 24.471 | 71.475 | 28.432 |
| ATOM | 4655 | HB3  | PRO | 333 | 23.178 | 72.582 | 27.913 |
| ATOM | 4656 | CA   | PRO | 333 | 24.884 | 72.520 | 26.589 |
| ATOM | 4657 | HA   | PRO | 333 | 24.401 | 73.310 | 26.015 |
| ATOM | 4658 | C    | PRO | 333 | 26.078 | 73.078 | 27.298 |
| ATOM | 4659 | O    | PRO | 333 | 26.067 | 74.260 | 27.639 |
| ATOM | 4660 | N    | LEU | 334 | 27.112 | 72.251 | 27.539 |
| ATOM | 4661 | H    | LEU | 334 | 27.045 | 71.388 | 27.292 |
| ATOM | 4662 | CA   | LEU | 334 | 28.306 | 72.723 | 28.177 |
| ATOM | 4663 | HA   | LEU | 334 | 28.050 | 73.250 | 29.096 |
| ATOM | 4664 | CB   | LEU | 334 | 29.226 | 71.551 | 28.525 |

|      |      |      |     |     |        |        |        |
|------|------|------|-----|-----|--------|--------|--------|
| ATOM | 4665 | HB2  | LEU | 334 | 29.322 | 71.006 | 27.586 |
| ATOM | 4666 | HB3  | LEU | 334 | 30.197 | 71.957 | 28.809 |
| ATOM | 4667 | CG   | LEU | 334 | 28.731 | 70.601 | 29.617 |
| ATOM | 4668 | HG   | LEU | 334 | 27.725 | 70.266 | 29.364 |
| ATOM | 4669 | CD1  | LEU | 334 | 29.651 | 69.396 | 29.739 |
| ATOM | 4670 | HD11 | LEU | 334 | 30.657 | 69.730 | 29.993 |
| ATOM | 4671 | HD12 | LEU | 334 | 29.281 | 68.733 | 30.521 |
| ATOM | 4672 | HD13 | LEU | 334 | 29.676 | 68.860 | 28.790 |
| ATOM | 4673 | CD2  | LEU | 334 | 28.625 | 71.324 | 30.951 |
| ATOM | 4674 | HD21 | LEU | 334 | 27.923 | 72.153 | 30.861 |
| ATOM | 4675 | HD22 | LEU | 334 | 28.271 | 70.630 | 31.714 |
| ATOM | 4676 | HD23 | LEU | 334 | 29.605 | 71.708 | 31.236 |
| ATOM | 4677 | C    | LEU | 334 | 28.947 | 73.691 | 27.230 |
| ATOM | 4678 | O    | LEU | 334 | 29.424 | 74.750 | 27.634 |
| ATOM | 4679 | N    | LEU | 335 | 28.958 | 73.342 | 25.930 |
| ATOM | 4680 | H    | LEU | 335 | 28.554 | 72.568 | 25.710 |
| ATOM | 4681 | CA   | LEU | 335 | 29.577 | 74.143 | 24.912 |
| ATOM | 4682 | HA   | LEU | 335 | 30.612 | 74.351 | 25.184 |
| ATOM | 4683 | CB   | LEU | 335 | 29.562 | 73.409 | 23.570 |
| ATOM | 4684 | HB2  | LEU | 335 | 30.110 | 72.488 | 23.769 |
| ATOM | 4685 | HB3  | LEU | 335 | 28.526 | 73.170 | 23.328 |
| ATOM | 4686 | CG   | LEU | 335 | 30.206 | 74.140 | 22.390 |
| ATOM | 4687 | HG   | LEU | 335 | 29.683 | 75.083 | 22.231 |
| ATOM | 4688 | CD1  | LEU | 335 | 31.676 | 74.416 | 22.667 |
| ATOM | 4689 | HD11 | LEU | 335 | 32.200 | 73.473 | 22.826 |
| ATOM | 4690 | HD12 | LEU | 335 | 32.115 | 74.936 | 21.816 |
| ATOM | 4691 | HD13 | LEU | 335 | 31.768 | 75.037 | 23.558 |
| ATOM | 4692 | CD2  | LEU | 335 | 30.051 | 73.335 | 21.109 |
| ATOM | 4693 | HD21 | LEU | 335 | 28.992 | 73.189 | 20.897 |
| ATOM | 4694 | HD22 | LEU | 335 | 30.516 | 73.873 | 20.283 |
| ATOM | 4695 | HD23 | LEU | 335 | 30.534 | 72.365 | 21.228 |
| ATOM | 4696 | C    | LEU | 335 | 28.863 | 75.455 | 24.818 |
| ATOM | 4697 | O    | LEU | 335 | 29.493 | 76.504 | 24.699 |
| ATOM | 4698 | N    | TYR | 336 | 27.519 | 75.428 | 24.882 |
| ATOM | 4699 | H    | TYR | 336 | 27.106 | 74.637 | 24.996 |
| ATOM | 4700 | CA   | TYR | 336 | 26.745 | 76.633 | 24.772 |
| ATOM | 4701 | HA   | TYR | 336 | 27.002 | 77.154 | 23.850 |
| ATOM | 4702 | CB   | TYR | 336 | 25.250 | 76.309 | 24.750 |
| ATOM | 4703 | HB2  | TYR | 336 | 25.058 | 75.621 | 25.573 |
| ATOM | 4704 | HB3  | TYR | 336 | 24.714 | 77.242 | 24.925 |
| ATOM | 4705 | CG   | TYR | 336 | 24.775 | 75.691 | 23.455 |
| ATOM | 4706 | CD1  | TYR | 336 | 23.723 | 74.784 | 23.443 |
| ATOM | 4707 | HD1  | TYR | 336 | 23.243 | 74.524 | 24.386 |
| ATOM | 4708 | CE1  | TYR | 336 | 23.283 | 74.214 | 22.264 |
| ATOM | 4709 | HE1  | TYR | 336 | 22.455 | 73.505 | 22.270 |
| ATOM | 4710 | CZ   | TYR | 336 | 23.896 | 74.548 | 21.075 |
| ATOM | 4711 | OH   | TYR | 336 | 23.460 | 73.981 | 19.900 |
| ATOM | 4712 | HH   | TYR | 336 | 22.829 | 73.466 | 20.060 |
| ATOM | 4713 | CE2  | TYR | 336 | 24.955 | 75.455 | 21.059 |
| ATOM | 4714 | HE2  | TYR | 336 | 25.446 | 75.723 | 20.123 |
| ATOM | 4715 | CD2  | TYR | 336 | 25.381 | 76.016 | 22.248 |
| ATOM | 4716 | HD2  | TYR | 336 | 26.207 | 76.728 | 22.250 |

|      |      |      |     |     |        |        |        |
|------|------|------|-----|-----|--------|--------|--------|
| ATOM | 4717 | C    | TYR | 336 | 27.082 | 77.542 | 25.911 |
| ATOM | 4718 | O    | TYR | 336 | 27.116 | 78.760 | 25.749 |
| ATOM | 4719 | N    | THR | 337 | 27.329 | 76.971 | 27.102 |
| ATOM | 4720 | H    | THR | 337 | 27.313 | 76.073 | 27.165 |
| ATOM | 4721 | CA   | THR | 337 | 27.615 | 77.766 | 28.262 |
| ATOM | 4722 | HA   | THR | 337 | 26.780 | 78.442 | 28.446 |
| ATOM | 4723 | CB   | THR | 337 | 27.822 | 76.889 | 29.510 |
| ATOM | 4724 | HB   | THR | 337 | 28.638 | 76.192 | 29.322 |
| ATOM | 4725 | CG2  | THR | 337 | 28.160 | 77.751 | 30.717 |
| ATOM | 4726 | HG21 | THR | 337 | 27.344 | 78.448 | 30.906 |
| ATOM | 4727 | HG22 | THR | 337 | 28.303 | 77.114 | 31.590 |
| ATOM | 4728 | HG23 | THR | 337 | 29.076 | 78.309 | 30.521 |
| ATOM | 4729 | OG1  | THR | 337 | 26.621 | 76.159 | 29.790 |
| ATOM | 4730 | HG1  | THR | 337 | 26.434 | 75.676 | 29.141 |
| ATOM | 4731 | C    | THR | 337 | 28.834 | 78.591 | 27.981 |
| ATOM | 4732 | O    | THR | 337 | 28.917 | 79.750 | 28.383 |
| ATOM | 4733 | N    | TRP | 338 | 29.802 | 78.008 | 27.253 |
| ATOM | 4734 | H    | TRP | 338 | 29.634 | 77.173 | 26.961 |
| ATOM | 4735 | CA   | TRP | 338 | 31.048 | 78.642 | 26.935 |
| ATOM | 4736 | HA   | TRP | 338 | 31.548 | 78.954 | 27.852 |
| ATOM | 4737 | CB   | TRP | 338 | 31.965 | 77.675 | 26.183 |
| ATOM | 4738 | HB2  | TRP | 338 | 31.421 | 77.197 | 25.368 |
| ATOM | 4739 | HB3  | TRP | 338 | 32.826 | 78.209 | 25.781 |
| ATOM | 4740 | CG   | TRP | 338 | 32.507 | 76.573 | 27.041 |
| ATOM | 4741 | CD1  | TRP | 338 | 32.159 | 75.254 | 26.997 |
| ATOM | 4742 | HD1  | TRP | 338 | 31.407 | 74.968 | 26.262 |
| ATOM | 4743 | NE1  | TRP | 338 | 32.868 | 74.545 | 27.936 |
| ATOM | 4744 | HE1  | TRP | 338 | 32.793 | 73.623 | 28.085 |
| ATOM | 4745 | CE2  | TRP | 338 | 33.696 | 75.410 | 28.609 |
| ATOM | 4746 | CZ2  | TRP | 338 | 34.599 | 75.165 | 29.641 |
| ATOM | 4747 | HZ2  | TRP | 338 | 34.703 | 74.144 | 30.009 |
| ATOM | 4748 | CH2  | TRP | 338 | 35.303 | 76.229 | 30.131 |
| ATOM | 4749 | HH2  | TRP | 338 | 36.020 | 76.078 | 30.938 |
| ATOM | 4750 | CZ3  | TRP | 338 | 35.123 | 77.517 | 29.616 |
| ATOM | 4751 | HZ3  | TRP | 338 | 35.690 | 78.358 | 30.015 |
| ATOM | 4752 | CE3  | TRP | 338 | 34.228 | 77.765 | 28.593 |
| ATOM | 4753 | HE3  | TRP | 338 | 34.125 | 78.787 | 28.230 |
| ATOM | 4754 | CD2  | TRP | 338 | 33.495 | 76.694 | 28.072 |
| ATOM | 4755 | C    | TRP | 338 | 30.771 | 79.868 | 26.127 |
| ATOM | 4756 | O    | TRP | 338 | 31.546 | 80.823 | 26.168 |
| ATOM | 4757 | N    | ARG | 339 | 29.653 | 79.872 | 25.372 |
| ATOM | 4758 | H    | ARG | 339 | 29.135 | 79.136 | 25.394 |
| ATOM | 4759 | CA   | ARG | 339 | 29.276 | 80.991 | 24.555 |
| ATOM | 4760 | HA   | ARG | 339 | 29.991 | 81.111 | 23.741 |
| ATOM | 4761 | CB   | ARG | 339 | 27.885 | 80.772 | 23.956 |
| ATOM | 4762 | HB2  | ARG | 339 | 27.920 | 79.839 | 23.394 |
| ATOM | 4763 | HB3  | ARG | 339 | 27.189 | 80.668 | 24.788 |
| ATOM | 4764 | CG   | ARG | 339 | 27.419 | 81.896 | 23.044 |
| ATOM | 4765 | HG2  | ARG | 339 | 26.360 | 81.753 | 22.831 |
| ATOM | 4766 | HG3  | ARG | 339 | 27.560 | 82.844 | 23.562 |
| ATOM | 4767 | CD   | ARG | 339 | 28.200 | 81.910 | 21.741 |
| ATOM | 4768 | HD2  | ARG | 339 | 29.216 | 82.250 | 21.940 |

|      |      |      |     |     |        |        |        |
|------|------|------|-----|-----|--------|--------|--------|
| ATOM | 4769 | HD3  | ARG | 339 | 28.229 | 80.899 | 21.334 |
| ATOM | 4770 | NE   | ARG | 339 | 27.596 | 82.797 | 20.750 |
| ATOM | 4771 | HE   | ARG | 339 | 27.005 | 82.455 | 20.225 |
| ATOM | 4772 | CZ   | ARG | 339 | 27.902 | 84.084 | 20.614 |
| ATOM | 4773 | NH1  | ARG | 339 | 27.300 | 84.814 | 19.685 |
| ATOM | 4774 | HH11 | ARG | 339 | 26.713 | 84.454 | 19.169 |
| ATOM | 4775 | HH12 | ARG | 339 | 27.498 | 85.646 | 19.597 |
| ATOM | 4776 | NH2  | ARG | 339 | 28.808 | 84.637 | 21.409 |
| ATOM | 4777 | HH21 | ARG | 339 | 29.197 | 84.164 | 22.012 |
| ATOM | 4778 | HH22 | ARG | 339 | 29.005 | 85.470 | 21.321 |
| ATOM | 4779 | C    | ARG | 339 | 29.325 | 82.220 | 25.399 |
| ATOM | 4780 | O    | ARG | 339 | 29.359 | 82.154 | 26.627 |
| ATOM | 4781 | N    | ASN | 340 | 29.343 | 83.385 | 24.729 |
| ATOM | 4782 | H    | ASN | 340 | 29.236 | 83.352 | 23.836 |
| ATOM | 4783 | CA   | ASN | 340 | 29.523 | 84.643 | 25.380 |
| ATOM | 4784 | HA   | ASN | 340 | 30.452 | 84.634 | 25.950 |
| ATOM | 4785 | CB   | ASN | 340 | 29.592 | 85.774 | 24.351 |
| ATOM | 4786 | HB2  | ASN | 340 | 30.249 | 85.468 | 23.537 |
| ATOM | 4787 | HB3  | ASN | 340 | 28.590 | 85.954 | 23.960 |
| ATOM | 4788 | CG   | ASN | 340 | 30.121 | 87.066 | 24.941 |
| ATOM | 4789 | OD1  | ASN | 340 | 31.147 | 87.075 | 25.622 |
| ATOM | 4790 | ND2  | ASN | 340 | 29.421 | 88.164 | 24.681 |
| ATOM | 4791 | HD21 | ASN | 340 | 29.691 | 88.958 | 25.007 |
| ATOM | 4792 | HD22 | ASN | 340 | 28.676 | 88.114 | 24.178 |
| ATOM | 4793 | C    | ASN | 340 | 28.433 | 84.884 | 26.361 |
| ATOM | 4794 | O    | ASN | 340 | 27.647 | 84.003 | 26.705 |
| ATOM | 4795 | N    | GLU | 341 | 28.363 | 86.142 | 26.814 |
| ATOM | 4796 | H    | GLU | 341 | 28.906 | 86.749 | 26.431 |
| ATOM | 4797 | CA   | GLU | 341 | 27.477 | 86.536 | 27.857 |
| ATOM | 4798 | HA   | GLU | 341 | 27.730 | 86.008 | 28.776 |
| ATOM | 4799 | CB   | GLU | 341 | 27.586 | 88.041 | 28.112 |
| ATOM | 4800 | HB2  | GLU | 341 | 27.460 | 88.539 | 27.151 |
| ATOM | 4801 | HB3  | GLU | 341 | 26.764 | 88.315 | 28.774 |
| ATOM | 4802 | CG   | GLU | 341 | 28.903 | 88.471 | 28.736 |
| ATOM | 4803 | HG2  | GLU | 341 | 29.708 | 88.141 | 28.079 |
| ATOM | 4804 | HG3  | GLU | 341 | 28.907 | 89.559 | 28.795 |
| ATOM | 4805 | CD   | GLU | 341 | 29.110 | 87.889 | 30.121 |
| ATOM | 4806 | OE1  | GLU | 341 | 28.193 | 88.013 | 30.960 |
| ATOM | 4807 | OE2  | GLU | 341 | 30.189 | 87.310 | 30.367 |
| ATOM | 4808 | C    | GLU | 341 | 26.106 | 86.140 | 27.455 |
| ATOM | 4809 | O    | GLU | 341 | 25.247 | 85.949 | 28.314 |
| ATOM | 4810 | N    | GLU | 342 | 25.852 | 86.024 | 26.139 |
| ATOM | 4811 | H    | GLU | 342 | 26.489 | 86.136 | 25.514 |
| ATOM | 4812 | CA   | GLU | 342 | 24.513 | 85.711 | 25.747 |
| ATOM | 4813 | HA   | GLU | 342 | 23.835 | 86.492 | 26.091 |
| ATOM | 4814 | CB   | GLU | 342 | 24.410 | 85.611 | 24.224 |
| ATOM | 4815 | HB2  | GLU | 342 | 25.165 | 84.895 | 23.898 |
| ATOM | 4816 | HB3  | GLU | 342 | 23.418 | 85.222 | 23.994 |
| ATOM | 4817 | CG   | GLU | 342 | 24.617 | 86.931 | 23.499 |
| ATOM | 4818 | HG2  | GLU | 342 | 24.153 | 86.851 | 22.516 |
| ATOM | 4819 | HG3  | GLU | 342 | 24.116 | 87.710 | 24.073 |
| ATOM | 4820 | CD   | GLU | 342 | 26.083 | 87.284 | 23.339 |

|      |      |      |     |     |        |        |        |
|------|------|------|-----|-----|--------|--------|--------|
| ATOM | 4821 | OE1  | GLU | 342 | 26.938 | 86.483 | 23.773 |
| ATOM | 4822 | OE2  | GLU | 342 | 26.376 | 88.361 | 22.779 |
| ATOM | 4823 | C    | GLU | 342 | 24.058 | 84.427 | 26.387 |
| ATOM | 4824 | O    | GLU | 342 | 23.161 | 84.445 | 27.226 |
| ATOM | 4825 | N    | PHE | 343 | 24.690 | 83.283 | 26.061 |
| ATOM | 4826 | H    | PHE | 343 | 25.376 | 83.296 | 25.478 |
| ATOM | 4827 | CA   | PHE | 343 | 24.267 | 82.038 | 26.647 |
| ATOM | 4828 | HA   | PHE | 343 | 23.181 | 81.958 | 26.601 |
| ATOM | 4829 | CB   | PHE | 343 | 24.876 | 80.856 | 25.891 |
| ATOM | 4830 | HB2  | PHE | 343 | 25.939 | 81.029 | 25.720 |
| ATOM | 4831 | HB3  | PHE | 343 | 24.745 | 79.938 | 26.463 |
| ATOM | 4832 | CG   | PHE | 343 | 24.258 | 80.614 | 24.544 |
| ATOM | 4833 | CD1  | PHE | 343 | 24.601 | 81.400 | 23.457 |
| ATOM | 4834 | HD1  | PHE | 343 | 25.328 | 82.202 | 23.586 |
| ATOM | 4835 | CE1  | PHE | 343 | 24.032 | 81.177 | 22.218 |
| ATOM | 4836 | HE1  | PHE | 343 | 24.312 | 81.802 | 21.370 |
| ATOM | 4837 | CZ   | PHE | 343 | 23.109 | 80.162 | 22.053 |
| ATOM | 4838 | HZ   | PHE | 343 | 22.657 | 79.983 | 21.078 |
| ATOM | 4839 | CE2  | PHE | 343 | 22.763 | 79.379 | 23.123 |
| ATOM | 4840 | HE2  | PHE | 343 | 22.035 | 78.578 | 22.993 |
| ATOM | 4841 | CD2  | PHE | 343 | 23.333 | 79.601 | 24.363 |
| ATOM | 4842 | HD2  | PHE | 343 | 23.055 | 78.975 | 25.211 |
| ATOM | 4843 | C    | PHE | 343 | 24.641 | 81.972 | 28.094 |
| ATOM | 4844 | O    | PHE | 343 | 23.848 | 81.538 | 28.929 |
| ATOM | 4845 | N    | ARG | 344 | 25.870 | 82.408 | 28.424 |
| ATOM | 4846 | H    | ARG | 344 | 26.383 | 82.785 | 27.788 |
| ATOM | 4847 | CA   | ARG | 344 | 26.366 | 82.280 | 29.764 |
| ATOM | 4848 | HA   | ARG | 344 | 26.311 | 81.238 | 30.080 |
| ATOM | 4849 | CB   | ARG | 344 | 27.824 | 82.738 | 29.842 |
| ATOM | 4850 | HB2  | ARG | 344 | 28.391 | 82.126 | 29.140 |
| ATOM | 4851 | HB3  | ARG | 344 | 27.851 | 83.779 | 29.520 |
| ATOM | 4852 | CG   | ARG | 344 | 28.438 | 82.620 | 31.227 |
| ATOM | 4853 | HG2  | ARG | 344 | 27.805 | 83.156 | 31.934 |
| ATOM | 4854 | HG3  | ARG | 344 | 28.477 | 81.566 | 31.501 |
| ATOM | 4855 | CD   | ARG | 344 | 29.841 | 83.204 | 31.260 |
| ATOM | 4856 | HD2  | ARG | 344 | 30.281 | 83.016 | 32.240 |
| ATOM | 4857 | HD3  | ARG | 344 | 30.445 | 82.719 | 30.493 |
| ATOM | 4858 | NE   | ARG | 344 | 29.841 | 84.644 | 31.015 |
| ATOM | 4859 | HE   | ARG | 344 | 29.089 | 85.055 | 31.093 |
| ATOM | 4860 | CZ   | ARG | 344 | 30.920 | 85.345 | 30.683 |
| ATOM | 4861 | NH1  | ARG | 344 | 30.825 | 86.652 | 30.480 |
| ATOM | 4862 | HH11 | ARG | 344 | 30.065 | 87.046 | 30.562 |
| ATOM | 4863 | HH12 | ARG | 344 | 31.523 | 87.106 | 30.265 |
| ATOM | 4864 | NH2  | ARG | 344 | 32.092 | 84.738 | 30.555 |
| ATOM | 4865 | HH21 | ARG | 344 | 32.154 | 83.891 | 30.687 |
| ATOM | 4866 | HH22 | ARG | 344 | 32.791 | 85.192 | 30.341 |
| ATOM | 4867 | C    | ARG | 344 | 25.519 | 83.069 | 30.712 |
| ATOM | 4868 | O    | ARG | 344 | 25.088 | 82.554 | 31.743 |
| ATOM | 4869 | N    | ARG | 345 | 25.240 | 84.343 | 30.382 |
| ATOM | 4870 | H    | ARG | 345 | 25.534 | 84.672 | 29.597 |
| ATOM | 4871 | CA   | ARG | 345 | 24.480 | 85.177 | 31.270 |
| ATOM | 4872 | HA   | ARG | 345 | 24.927 | 85.162 | 32.264 |

|      |      |      |     |     |        |        |        |
|------|------|------|-----|-----|--------|--------|--------|
| ATOM | 4873 | CB   | ARG | 345 | 24.461 | 86.621 | 30.764 |
| ATOM | 4874 | HB2  | ARG | 345 | 25.498 | 86.927 | 30.627 |
| ATOM | 4875 | HB3  | ARG | 345 | 23.954 | 86.617 | 29.799 |
| ATOM | 4876 | CG   | ARG | 345 | 23.764 | 87.597 | 31.698 |
| ATOM | 4877 | HG2  | ARG | 345 | 22.723 | 87.293 | 31.804 |
| ATOM | 4878 | HG3  | ARG | 345 | 24.255 | 87.558 | 32.671 |
| ATOM | 4879 | CD   | ARG | 345 | 23.824 | 89.016 | 31.158 |
| ATOM | 4880 | HD2  | ARG | 345 | 23.399 | 89.031 | 30.154 |
| ATOM | 4881 | HD3  | ARG | 345 | 23.242 | 89.669 | 31.809 |
| ATOM | 4882 | NE   | ARG | 345 | 25.194 | 89.520 | 31.094 |
| ATOM | 4883 | HE   | ARG | 345 | 25.771 | 89.156 | 31.621 |
| ATOM | 4884 | CZ   | ARG | 345 | 25.596 | 90.492 | 30.282 |
| ATOM | 4885 | NH1  | ARG | 345 | 26.862 | 90.884 | 30.293 |
| ATOM | 4886 | HH11 | ARG | 345 | 27.424 | 90.509 | 30.826 |
| ATOM | 4887 | HH12 | ARG | 345 | 27.122 | 91.513 | 29.767 |
| ATOM | 4888 | NH2  | ARG | 345 | 24.730 | 91.069 | 29.460 |
| ATOM | 4889 | HH21 | ARG | 345 | 23.908 | 90.815 | 29.453 |
| ATOM | 4890 | HH22 | ARG | 345 | 24.990 | 91.698 | 28.935 |
| ATOM | 4891 | C    | ARG | 345 | 23.092 | 84.655 | 31.410 |
| ATOM | 4892 | O    | ARG | 345 | 22.547 | 84.624 | 32.513 |
| ATOM | 4893 | N    | SER | 346 | 22.482 | 84.207 | 30.301 |
| ATOM | 4894 | H    | SER | 346 | 22.908 | 84.189 | 29.509 |
| ATOM | 4895 | CA   | SER | 346 | 21.130 | 83.754 | 30.396 |
| ATOM | 4896 | HA   | SER | 346 | 20.503 | 84.545 | 30.808 |
| ATOM | 4897 | CB   | SER | 346 | 20.594 | 83.375 | 29.014 |
| ATOM | 4898 | HB2  | SER | 346 | 19.535 | 83.134 | 29.104 |
| ATOM | 4899 | HB3  | SER | 346 | 20.716 | 84.228 | 28.346 |
| ATOM | 4900 | OG   | SER | 346 | 21.289 | 82.259 | 28.486 |
| ATOM | 4901 | HG   | SER | 346 | 22.095 | 82.443 | 28.417 |
| ATOM | 4902 | C    | SER | 346 | 21.112 | 82.596 | 31.343 |
| ATOM | 4903 | O    | SER | 346 | 20.163 | 82.419 | 32.105 |
| ATOM | 4904 | N    | VAL | 347 | 22.176 | 81.773 | 31.319 |
| ATOM | 4905 | H    | VAL | 347 | 22.836 | 81.930 | 30.728 |
| ATOM | 4906 | CA   | VAL | 347 | 22.268 | 80.660 | 32.217 |
| ATOM | 4907 | HA   | VAL | 347 | 21.368 | 80.045 | 32.186 |
| ATOM | 4908 | CB   | VAL | 347 | 23.483 | 79.771 | 31.892 |
| ATOM | 4909 | HB   | VAL | 347 | 24.372 | 80.397 | 31.823 |
| ATOM | 4910 | CG1  | VAL | 347 | 23.683 | 78.725 | 32.977 |
| ATOM | 4911 | HG11 | VAL | 347 | 22.794 | 78.098 | 33.046 |
| ATOM | 4912 | HG12 | VAL | 347 | 24.546 | 78.106 | 32.731 |
| ATOM | 4913 | HG13 | VAL | 347 | 23.853 | 79.220 | 33.933 |
| ATOM | 4914 | CG2  | VAL | 347 | 23.310 | 79.109 | 30.533 |
| ATOM | 4915 | HG21 | VAL | 347 | 23.217 | 79.876 | 29.764 |
| ATOM | 4916 | HG22 | VAL | 347 | 24.178 | 78.485 | 30.319 |
| ATOM | 4917 | HG23 | VAL | 347 | 22.412 | 78.492 | 30.541 |
| ATOM | 4918 | C    | VAL | 347 | 22.339 | 81.200 | 33.609 |
| ATOM | 4919 | O    | VAL | 347 | 21.684 | 80.693 | 34.518 |
| ATOM | 4920 | N    | ARG | 348 | 23.138 | 82.265 | 33.811 |
| ATOM | 4921 | H    | ARG | 348 | 23.588 | 82.632 | 33.124 |
| ATOM | 4922 | CA   | ARG | 348 | 23.269 | 82.813 | 35.128 |
| ATOM | 4923 | HA   | ARG | 348 | 23.664 | 82.056 | 35.805 |
| ATOM | 4924 | CB   | ARG | 348 | 24.225 | 84.007 | 35.119 |

|      |      |      |     |     |        |        |        |
|------|------|------|-----|-----|--------|--------|--------|
| ATOM | 4925 | HB2  | ARG | 348 | 23.868 | 84.698 | 34.356 |
| ATOM | 4926 | HB3  | ARG | 348 | 24.156 | 84.481 | 36.098 |
| ATOM | 4927 | CG   | ARG | 348 | 25.673 | 83.642 | 34.834 |
| ATOM | 4928 | HG2  | ARG | 348 | 25.963 | 82.828 | 35.498 |
| ATOM | 4929 | HG3  | ARG | 348 | 25.750 | 83.310 | 33.799 |
| ATOM | 4930 | CD   | ARG | 348 | 26.596 | 84.829 | 35.055 |
| ATOM | 4931 | HD2  | ARG | 348 | 26.466 | 85.193 | 36.074 |
| ATOM | 4932 | HD3  | ARG | 348 | 27.628 | 84.509 | 34.913 |
| ATOM | 4933 | NE   | ARG | 348 | 26.313 | 85.922 | 34.128 |
| ATOM | 4934 | HE   | ARG | 348 | 25.774 | 86.536 | 34.399 |
| ATOM | 4935 | CZ   | ARG | 348 | 26.834 | 86.021 | 32.909 |
| ATOM | 4936 | NH1  | ARG | 348 | 26.519 | 87.052 | 32.136 |
| ATOM | 4937 | HH11 | ARG | 348 | 25.979 | 87.656 | 32.423 |
| ATOM | 4938 | HH12 | ARG | 348 | 26.856 | 87.116 | 31.347 |
| ATOM | 4939 | NH2  | ARG | 348 | 27.667 | 85.090 | 32.466 |
| ATOM | 4940 | HH21 | ARG | 348 | 27.871 | 84.422 | 32.968 |
| ATOM | 4941 | HH22 | ARG | 348 | 28.003 | 85.154 | 31.677 |
| ATOM | 4942 | C    | ARG | 348 | 21.878 | 83.204 | 35.610 |
| ATOM | 4943 | O    | ARG | 348 | 21.297 | 84.165 | 35.039 |
| ATOM | 4944 | OXT  | ARG | 348 | 21.369 | 82.549 | 36.559 |
